# Supplementary material
Source: HighWire-hosted journal article supplement (doi:10.1101/gr.281150.125)
Supplement: Supplemental_Tables.xlsx [file Supplemental_Tables.xlsx]

## Sheet: README
Supplemental Tables
Dynamics and consequences of differential RNA isoform production during cardiomyocyte fate determination and early-stage maturation
Joanna Delimata-Raczek1, Natalia Koralewska1, Bart Krist1, Magdalena Rakoczy1, Marek Figlerowicz1, Ireneusz Stolarek1*
1 Institute of Bioorganic Chemistry Polish Academy of Sciences, Noskowskiego 12/14, 61-704 Poznan, Poland
* Correspondence and requests for materials should be addressed to:
Dr. Ireneusz Stolarek
email: istolarek@ibch.poznan.pl

## Sheet: Supplemental Table S1
Supplemental Table S1. Transcript isoforms regulated by DTA during cardiac differentiation identified in this study
Isoform ID	Gene ID	Condition 1 (C1)	Condition 2 (C2)	Gene Biotype	Isoform Biotype	Gene Mean Abundance	Gene Abundance C1	Gene Abundance C2	Isoform Mean Abundance	PTC	Intron Retention	Coding Potential Score	Coding Potential Status	Protein Domain Identified	Signal Peptide	idr_identified	switchConsequencesGene
ENST00000474746.1	ZZZ3	D0	D2	protein_coding	processed_transcript	47.1409768851851	53.5702246739772	43.9391013117541	3.07026747434809	NA	0	NA	NA	NA	NA	NA	NA
ENST00000476496.5	ZSWIM7	D0	D2	protein_coding	nonsense_mediated_decay	43.2115266422896	54.0028406653135	53.2270682459785	5.00474042063255	NA	0	0.0077879	FALSE	NA	NA	NA	NA
ENST00000396827.3	ZSCAN12	D0	D2	protein_coding	protein_coding	11.5219749582706	9.70260843283069	14.3119124578942	4.90548711089419	TRUE	0	NA	NA	no	no	no	NA
ENST00000684592.1	ZSCAN12	D0	D2	protein_coding	protein_coding	11.5219749582706	9.70260843283069	14.3119124578942	4.85825322406887	FALSE	0	NA	NA	no	no	no	NA
ENST00000309328.8	ZNRD2	D0	D2	protein_coding	protein_coding	12.6365838029138	33.0304463464839	7.96268755830719	8.10735881332741	FALSE	0	0.999425	TRUE	yes	no	yes	TRUE
ENST00000527413.1	ZNRD2	D0	D2	protein_coding	retained_intron	12.6365838029138	33.0304463464839	7.96268755830719	3.7127236567462	NA	0	0.29811	FALSE	NA	NA	NA	TRUE
ENST00000469078.5	ZNF90	D0	D2	protein_coding	nonsense_mediated_decay	83.3147093176045	95.4662173491905	135.296242190123	11.6427666868534	TRUE	0	0.688674	TRUE	yes	no	no	NA
ENST00000541777.6	ZNF83	D0	D2	protein_coding	processed_transcript	60.4811285855294	25.2130849705564	34.0207748471597	12.6798954551986	NA	1	1	TRUE	NA	NA	NA	NA
ENST00000379724.3	ZNF789	D0	D2	protein_coding	protein_coding	7.70482805340677	5.57994329155363	9.01183890842705	0.322380089912675	NA	0	0.155929	FALSE	NA	NA	NA	FALSE
ENST00000481108.1	ZNF789	D0	D2	protein_coding	retained_intron	7.70482805340677	5.57994329155363	9.01183890842705	1.82718446298041	NA	0	0.234627	FALSE	NA	NA	NA	FALSE
ENST00000356584.8	ZNF772	D0	D2	protein_coding	protein_coding	12.1506366561302	11.7896778092232	10.024380560164	2.42001203944713	FALSE	0	0.999986	TRUE	yes	no	no	TRUE
ENST00000425074.3	ZNF772	D0	D2	protein_coding	protein_coding	12.1506366561302	11.7896778092232	10.024380560164	1.78972664179834	FALSE	0	1	TRUE	no	no	no	TRUE
ENST00000373165.7	ZNF711	D0	D2	protein_coding	protein_coding	30.0549165142169	22.3808292548999	37.8308822435512	9.94676194643414	FALSE	0	1	TRUE	yes	no	yes	TRUE
ENST00000674551.1	ZNF711	D0	D2	protein_coding	protein_coding	30.0549165142169	22.3808292548999	37.8308822435512	4.98324811255811	FALSE	0	1	TRUE	yes	no	yes	TRUE
ENST00000252713.9	ZNF655	D0	D2	protein_coding	protein_coding	52.1937242945835	40.169242564302	58.0054682785377	8.3477989263913	FALSE	0	1	TRUE	yes	no	yes	TRUE
ENST00000422164.5	ZNF655	D0	D2	protein_coding	protein_coding	52.1937242945835	40.169242564302	58.0054682785377	3.55042954644516	NA	0	0.219402	FALSE	NA	NA	NA	TRUE
ENST00000306315.9	ZNF608	D0	D2	protein_coding	protein_coding	53.1195096947187	39.6930466128532	37.7162367764215	6.54216583489721	FALSE	1	1	TRUE	no	no	yes	TRUE
ENST00000504926.5	ZNF608	D0	D2	protein_coding	protein_coding	53.1195096947187	39.6930466128532	37.7162367764215	7.3640212058923	FALSE	0	1	TRUE	no	no	yes	TRUE
ENST00000513986.2	ZNF608	D0	D2	protein_coding	protein_coding	53.1195096947187	39.6930466128532	37.7162367764215	22.639719815506	FALSE	1	1	TRUE	no	no	yes	TRUE
ENST00000328550.6	ZNF571	D0	D2	protein_coding	protein_coding	7.78199052722939	4.50864898363607	10.3648113598855	0.945752150236784	TRUE	0	1	TRUE	yes	no	no	TRUE
ENST00000590751.5	ZNF571	D0	D2	protein_coding	protein_coding	7.78199052722939	4.50864898363607	10.3648113598855	4.20817307589596	FALSE	0	0.764095	TRUE	yes	no	no	TRUE
ENST00000355467.6	ZNF512	D0	D2	protein_coding	protein_coding	36.6872193028848	53.4092318257143	34.4487362677401	6.3473226784998	FALSE	0	1	TRUE	yes	no	yes	TRUE
ENST00000461705.1	ZNF512	D0	D2	protein_coding	retained_intron	36.6872193028848	53.4092318257143	34.4487362677401	2.28843308063784	NA	0	0.0120959	FALSE	NA	NA	NA	TRUE
ENST00000494548.1	ZNF512	D0	D2	protein_coding	processed_transcript	36.6872193028848	53.4092318257143	34.4487362677401	15.5394908101244	NA	0	0.128928	FALSE	NA	NA	NA	TRUE
ENST00000597273.1	ZNF432	D0	D2	protein_coding	protein_coding	21.6355189129395	10.8166130790907	25.1666127108574	6.85444928710209	NA	0	0.275165	FALSE	NA	NA	NA	TRUE
ENST00000436535.5	ZNF385C	D0	D2	protein_coding	protein_coding	3.73221434895478	1.5578998445883	10.2846885544579	0.383470413033511	FALSE	0	0.99999	TRUE	yes	no	yes	TRUE
ENST00000381253.5	ZNF343	D0	D2	protein_coding	protein_coding	7.69210930896437	6.10651134332745	7.37977767146841	0.714079899766445	FALSE	0	0.746243	TRUE	yes	no	no	TRUE
ENST00000432900.7	ZNF33A	D0	D2	protein_coding	protein_coding	33.0827999723984	42.4987707144226	33.7677595230846	14.4384923673846	FALSE	0	NA	NA	no	no	no	NA
ENST00000469037.2	ZNF33A	D0	D2	protein_coding	protein_coding	33.0827999723984	42.4987707144226	33.7677595230846	2.59995145943592	FALSE	0	NA	NA	no	no	no	NA
ENST00000423823.6	ZNF302	D0	D2	protein_coding	protein_coding	37.6781194198527	28.4348252905072	36.5896839309184	8.92779616954369	FALSE	1	1	TRUE	yes	no	no	TRUE
ENST00000691327.1	ZNF286A-TBC1D26	D0	D2	protein_coding	nonsense_mediated_decay	4.67495923258771	2.18490150398059	4.87088468408739	0.374553817494588	TRUE	1	1	TRUE	yes	no	yes	TRUE
ENST00000650832.1	ZNF283	D0	D2	protein_coding	protein_coding	14.3601834223193	10.9881329811665	12.7884858792161	1.59133706494134	FALSE	0	1	TRUE	yes	no	no	TRUE
ENST00000374446.7	ZNF239	D0	D2	protein_coding	protein_coding	8.52547123382323	6.05169019017954	10.57724580353	0.368432249931633	FALSE	0	1	TRUE	yes	no	yes	TRUE
ENST00000535642.5	ZNF239	D0	D2	protein_coding	protein_coding	8.52547123382323	6.05169019017954	10.57724580353	2.55156148524174	FALSE	0	1	TRUE	yes	no	yes	TRUE
ENST00000592780.5	ZNF225	D0	D2	protein_coding	protein_coding	5.37383017847102	5.59600879242871	5.54555151720433	0.254192091433198	FALSE	0	NA	NA	no	no	no	TRUE
ENST00000307355.12	ZNF138	D0	D2	protein_coding	protein_coding	31.4321641968497	58.5622655168207	27.046920985288	1.25222959600267	FALSE	0	0.999955	TRUE	yes	no	no	TRUE
ENST00000430838.2	ZNF138	D0	D2	protein_coding	processed_transcript	31.4321641968497	58.5622655168207	27.046920985288	16.1295277572624	NA	0	0.960945	TRUE	NA	NA	NA	TRUE
ENST00000440598.2	ZNF138	D0	D2	protein_coding	protein_coding	31.4321641968497	58.5622655168207	27.046920985288	4.57086946338698	FALSE	0	0.999244	TRUE	yes	no	no	TRUE
ENST00000263805.8	ZNF106	D0	D2	protein_coding	protein_coding	43.0639959521759	62.7537304881015	37.3161902143347	5.19342444012046	FALSE	2	1	TRUE	yes	no	yes	TRUE
ENST00000565948.1	ZNF106	D0	D2	protein_coding	protein_coding	43.0639959521759	62.7537304881015	37.3161902143347	10.7121382186142	FALSE	0	0.999873	TRUE	no	no	yes	TRUE
ENST00000458360.6	ZMYND8	D0	D2	protein_coding	protein_coding	40.941685554654	81.3509863578057	51.2526251645099	0.907886269986107	FALSE	0	1	TRUE	yes	no	yes	TRUE
ENST00000471951.7	ZMYND8	D0	D2	protein_coding	protein_coding	40.941685554654	81.3509863578057	51.2526251645099	5.39552693441718	FALSE	0	1	TRUE	yes	no	yes	TRUE
ENST00000611941.4	ZMYND8	D0	D2	protein_coding	protein_coding	40.941685554654	81.3509863578057	51.2526251645099	3.30684294700786	FALSE	0	1	TRUE	yes	no	yes	TRUE
ENST00000441627.5	ZMIZ2	D0	D2	protein_coding	protein_coding	7.81311682266053	8.81857767202755	4.72976215822797	0.487659039773331	FALSE	0	NA	NA	no	no	no	TRUE
ENST00000463931.1	ZMIZ2	D0	D2	protein_coding	processed_transcript	7.81311682266053	8.81857767202755	4.72976215822797	0.654215658425339	NA	0	NA	NA	NA	NA	NA	TRUE
ENST00000536878.6	ZIK1	D0	D2	protein_coding	protein_coding	11.4218282770274	15.2707513731539	12.7302297349785	0.461754459062751	FALSE	0	0.999998	TRUE	yes	no	no	TRUE
ENST00000597850.2	ZIK1	D0	D2	protein_coding	protein_coding	11.4218282770274	15.2707513731539	12.7302297349785	5.07008580339141	FALSE	0	0.999999	TRUE	yes	no	no	TRUE
ENST00000599456.1	ZIK1	D0	D2	protein_coding	protein_coding	11.4218282770274	15.2707513731539	12.7302297349785	4.16579483289116	FALSE	0	0.999999	TRUE	yes	no	no	TRUE
ENST00000600053.5	ZIK1	D0	D2	protein_coding	protein_coding	11.4218282770274	15.2707513731539	12.7302297349785	0.290820535951682	NA	0	0.0497575	FALSE	NA	NA	NA	TRUE
ENST00000502805.1	ZGRF1	D0	D2	protein_coding	nonsense_mediated_decay	42.0598203488704	65.1714487476311	39.8126251642904	4.04483547709559	NA	0	0.0449719	FALSE	NA	NA	NA	NA
ENST00000361584.5	ZFP69B	D0	D2	protein_coding	protein_coding	10.0829470237699	8.11258049461929	15.6082374145957	2.45641512005437	FALSE	0	1	TRUE	yes	no	yes	FALSE
ENST00000361387.6	ZFP64	D0	D2	protein_coding	protein_coding	17.873133857084	21.0880202480053	28.1891822170698	5.20512238160882	FALSE	0	1	TRUE	yes	no	yes	TRUE
ENST00000461898.1	ZFP64	D0	D2	protein_coding	processed_transcript	17.873133857084	21.0880202480053	28.1891822170698	3.44755445151108	NA	0	0.151613	FALSE	NA	NA	NA	TRUE
ENST00000439696.3	ZFP36L1	D0	D2	protein_coding	protein_coding	57.5759058771741	49.8353156719626	35.2555531071503	40.1913939178346	FALSE	1	0.999971	TRUE	yes	no	yes	TRUE
ENST00000555997.1	ZFP36L1	D0	D2	protein_coding	processed_transcript	57.5759058771741	49.8353156719626	35.2555531071503	16.0695087361957	NA	1	0.998939	TRUE	NA	NA	NA	TRUE
ENST00000672018.1	ZCCHC8	D0	D2	protein_coding	protein_coding	23.1849629074654	23.7997733965252	26.2257411198698	1.76502623768536	FALSE	0	NA	NA	no	no	no	FALSE
ENST00000441582.2	ZBTB38	D0	D2	protein_coding	protein_coding	19.4344980177556	9.66576729381618	35.081379567583	4.64750129552971	FALSE	0	NA	NA	no	no	no	TRUE
ENST00000512276.5	ZBTB38	D0	D2	protein_coding	processed_transcript	19.4344980177556	9.66576729381618	35.081379567583	1.52010769773401	NA	0	NA	NA	NA	NA	NA	TRUE
ENST00000337387.4	WTAP	D0	D2	protein_coding	protein_coding	64.6982595189727	80.9146446615328	73.0604515573505	16.2637428729613	FALSE	1	0.981855	TRUE	yes	no	no	TRUE
ENST00000621533.5	WTAP	D0	D2	protein_coding	protein_coding	64.6982595189727	80.9146446615328	73.0604515573505	31.1445255956196	FALSE	0	1	TRUE	yes	no	yes	TRUE
ENST00000471076.1	WNK2	D0	D2	protein_coding	retained_intron	13.292021234055	21.0632098522697	6.17482091655195	0.915633865175524	NA	0	0.0761509	FALSE	NA	NA	NA	FALSE
ENST00000561434.1	WDR73	D0	D2	protein_coding	retained_intron	15.5189540714616	9.78871764562439	19.5369779205787	0.850320254102277	NA	0	0.0284638	FALSE	NA	NA	NA	FALSE
ENST00000560036.1	WDR72	D0	D2	protein_coding	protein_coding	6.06624663438487	4.80289128193992	7.83333903400607	0.345228578578156	FALSE	0	0.999832	TRUE	yes	no	no	TRUE
ENST00000567224.1	WDR72	D0	D2	protein_coding	processed_transcript	6.06624663438487	4.80289128193992	7.83333903400607	0.909158026539037	NA	0	0.112661	FALSE	NA	NA	NA	TRUE
ENST00000393077.3	VTI1A	D0	D2	protein_coding	protein_coding	25.381506230106	18.9477725616055	34.3689527884663	5.57485924318327	FALSE	0	NA	NA	no	no	no	NA
ENST00000472892.1	VTI1A	D0	D2	protein_coding	processed_transcript	25.381506230106	18.9477725616055	34.3689527884663	0.531622395398342	NA	0	NA	NA	NA	NA	NA	NA
ENST00000483122.1	VTI1A	D0	D2	protein_coding	processed_transcript	25.381506230106	18.9477725616055	34.3689527884663	2.44783294875321	NA	0	NA	NA	NA	NA	NA	NA
ENST00000359236.10	VSIG10	D0	D2	protein_coding	protein_coding	15.7537283176322	28.5848216604198	24.116557628091	9.04840346202379	FALSE	1	1	TRUE	yes	yes	yes	NA
ENST00000680043.1	VLDLR	D0	D2	protein_coding	nonsense_mediated_decay	48.6100756300587	40.7028883835402	57.5726534262558	4.71497455385368	NA	0	1	TRUE	NA	NA	NA	NA
ENST00000598270.1	VAV1	D0	D2	protein_coding	retained_intron	1.54708938199166	2.39094775332029	1.43179156245755	1.03615225284395	NA	0	0.0204186	FALSE	NA	NA	NA	TRUE
ENST00000366965.6	VASH2	D0	D2	protein_coding	protein_coding	38.8705561674282	102.525418260757	30.9184929298097	5.32392821805741	FALSE	1	0.999331	TRUE	yes	no	yes	FALSE
ENST00000493155.1	VASH2	D0	D2	protein_coding	processed_transcript	38.8705561674282	102.525418260757	30.9184929298097	5.0546036776778	NA	0	0.302358	FALSE	NA	NA	NA	FALSE
ENST00000519906.1	VASH2	D0	D2	protein_coding	processed_transcript	38.8705561674282	102.525418260757	30.9184929298097	5.25270269556703	NA	0	0.00553953	FALSE	NA	NA	NA	FALSE
ENST00000367545.8	UTRN	D0	D2	protein_coding	protein_coding	106.558655052582	159.351111905644	49.2768211678493	48.510140929697	FALSE	0	1	TRUE	yes	no	yes	TRUE
ENST00000255304.9	USPL1	D0	D2	protein_coding	protein_coding	14.1791754255767	14.7415206273583	13.2901578093588	6.68250093213122	FALSE	0	1	TRUE	yes	no	yes	TRUE
ENST00000465952.5	USPL1	D0	D2	protein_coding	processed_transcript	14.1791754255767	14.7415206273583	13.2901578093588	7.4543087352705	NA	0	0.0592809	FALSE	NA	NA	NA	TRUE
ENST00000242576.7	UNG	D0	D2	protein_coding	protein_coding	46.8038341407943	98.7026200892466	40.1704482153542	33.9158744209955	FALSE	0	0.999373	TRUE	yes	no	yes	NA
ENST00000658188.1	UBAC2-AS1	D0	D2	lncRNA	lncRNA	2.71323172088347	1.59560180620993	3.76829258493839	0.179127713383912	NA	0	0.0401654	FALSE	NA	NA	NA	FALSE
ENST00000662755.1	UBAC2-AS1	D0	D2	lncRNA	lncRNA	2.71323172088347	1.59560180620993	3.76829258493839	1.19173878555035	NA	0	0.0243548	FALSE	NA	NA	NA	FALSE
ENST00000335972.11	UBA1	D0	D2	protein_coding	protein_coding	43.8149292919784	77.6946898718531	49.7866488693315	25.7404981659378	FALSE	0	1	TRUE	yes	no	yes	FALSE
ENST00000377351.8	UBA1	D0	D2	protein_coding	protein_coding	43.8149292919784	77.6946898718531	49.7866488693315	10.5799532810286	FALSE	0	1	TRUE	yes	no	yes	FALSE
ENST00000334363.14	TXNRD2	D0	D2	protein_coding	protein_coding	3.6579429030469	3.90422370274916	2.70034505582949	0.354678120863749	FALSE	0	0.999988	TRUE	yes	no	no	TRUE
ENST00000495655.2	TXNRD2	D0	D2	protein_coding	retained_intron	3.6579429030469	3.90422370274916	2.70034505582949	0.245041718943085	NA	3	0.916856	TRUE	NA	NA	NA	TRUE
ENST00000503506.6	TXNRD1	D0	D2	protein_coding	protein_coding	69.506804435858	144.655827289573	55.1767076244294	21.3976509326777	NA	0	1	TRUE	NA	NA	NA	NA
ENST00000375669.7	TUBGCP3	D0	D2	protein_coding	protein_coding	16.7602803447348	18.7190722178722	18.9210665952043	2.70738547123564	FALSE	0	1	TRUE	yes	no	yes	FALSE
ENST00000340993.10	TUBD1	D0	D2	protein_coding	protein_coding	12.6060466233138	14.833351308185	11.2716321649526	0.98726849120645	FALSE	0	1	TRUE	yes	no	no	TRUE
ENST00000587476.1	TUBD1	D0	D2	protein_coding	retained_intron	12.6060466233138	14.833351308185	11.2716321649526	1.2897777979081	NA	0	0.05026	FALSE	NA	NA	NA	TRUE
ENST00000588009.1	TUBD1	D0	D2	protein_coding	retained_intron	12.6060466233138	14.833351308185	11.2716321649526	0.621829282821531	NA	0	0.420994	FALSE	NA	NA	NA	TRUE
ENST00000409245.5	TTC7A	D0	D2	protein_coding	protein_coding	3.36166642742066	4.96217859378363	3.40046996935589	1.21781610237854	FALSE	0	1	TRUE	yes	no	no	TRUE
ENST00000651101.1	TTC7A	D0	D2	protein_coding	processed_transcript	3.36166642742066	4.96217859378363	3.40046996935589	0.0913862726234925	NA	0	0.964643	TRUE	NA	NA	NA	TRUE
ENST00000507285.5	TTC39B	D0	D2	protein_coding	protein_coding	19.3153195749108	11.97363614816	37.7157703070617	1.12779573986442	FALSE	0	1	TRUE	yes	no	no	NA
ENST00000507993.5	TTC39B	D0	D2	protein_coding	protein_coding	19.3153195749108	11.97363614816	37.7157703070617	2.47307065544031	FALSE	0	1	TRUE	yes	no	no	NA
ENST00000530366.5	TSSC2	D0	D2	transcribed_unprocessed_pseudogene	processed_transcript	36.4343932034573	59.5492030976287	50.1168745397914	3.50317796173185	NA	0	0.0381219	FALSE	NA	NA	NA	NA
ENST00000478090.5	TSGA10	D0	D2	protein_coding	processed_transcript	13.9487555161299	10.4647219264127	21.2040618551509	1.99160635723738	NA	1	0.999892	TRUE	NA	NA	NA	TRUE
ENST00000489348.1	TSGA10	D0	D2	protein_coding	processed_transcript	13.9487555161299	10.4647219264127	21.2040618551509	0.381930752438894	NA	0	0.00889574	FALSE	NA	NA	NA	TRUE
ENST00000489546.5	TSGA10	D0	D2	protein_coding	processed_transcript	13.9487555161299	10.4647219264127	21.2040618551509	1.51472012630593	NA	0	0.999758	TRUE	NA	NA	NA	TRUE
ENST00000261489.6	TSC22D1	D0	D2	protein_coding	protein_coding	96.5162052378014	61.2700193194434	79.9254180356009	23.0705774643889	FALSE	0	0.935188	TRUE	yes	no	yes	NA
ENST00000458659.3	TSC22D1	D0	D2	protein_coding	protein_coding	96.5162052378014	61.2700193194434	79.9254180356009	13.7388084741657	FALSE	0	1	TRUE	yes	no	yes	NA
ENST00000252826.10	TRPM4	D0	D2	protein_coding	protein_coding	6.43335346540869	4.14480220496125	2.83151136508093	0.339783435251903	FALSE	0	1	TRUE	yes	no	no	TRUE
ENST00000396285.5	TRPM3	D0	D2	protein_coding	protein_coding	10.4295799986744	2.72850347540006	13.0899690275769	0.361996605124611	FALSE	0	1	TRUE	yes	no	yes	NA
ENST00000351937.9	TRIM41	D0	D2	protein_coding	protein_coding	7.27828829394519	7.23521801040417	8.06558786330685	0.279344974164465	FALSE	0	1	TRUE	yes	no	yes	TRUE
ENST00000515223.1	TRIM41	D0	D2	protein_coding	retained_intron	7.27828829394519	7.23521801040417	8.06558786330685	1.67756001900567	NA	6	0.998738	TRUE	NA	NA	NA	TRUE
ENST00000379965.8	TRIM22	D0	D2	protein_coding	protein_coding	33.5722841394338	46.6549767353654	36.1168295858208	3.1726930690957	FALSE	1	1	TRUE	yes	no	no	TRUE
ENST00000414897.5	TRIM22	D0	D2	protein_coding	nonsense_mediated_decay	33.5722841394338	46.6549767353654	36.1168295858208	2.19001917628957	NA	0	0.166154	FALSE	NA	NA	NA	TRUE
ENST00000425490.5	TRIM22	D0	D2	protein_coding	protein_coding	33.5722841394338	46.6549767353654	36.1168295858208	1.8590600150904	NA	0	0.242878	FALSE	NA	NA	NA	TRUE
ENST00000450670.5	TRIM22	D0	D2	protein_coding	protein_coding	33.5722841394338	46.6549767353654	36.1168295858208	22.1316853496435	NA	0	0.068359	FALSE	NA	NA	NA	TRUE
ENST00000493494.1	TRIM22	D0	D2	protein_coding	retained_intron	33.5722841394338	46.6549767353654	36.1168295858208	1.02762921162727	NA	0	0.167185	FALSE	NA	NA	NA	TRUE
ENST00000629576.2	TRG-AS1	D0	D2	lncRNA	lncRNA	10.9413036900785	1.91939715036664	17.5765841127399	2.47580504675058	NA	0	0.162217	FALSE	NA	NA	NA	FALSE
ENST00000668633.1	TRG-AS1	D0	D2	lncRNA	lncRNA	10.9413036900785	1.91939715036664	17.5765841127399	3.16087108556812	NA	0	0.0453194	FALSE	NA	NA	NA	FALSE
ENST00000346249.9	TPD52L2	D0	D2	protein_coding	protein_coding	25.7118369614282	31.7015347800951	24.4488707448344	11.6848812495497	FALSE	0	NA	NA	no	no	no	TRUE
ENST00000348257.9	TPD52L2	D0	D2	protein_coding	protein_coding	25.7118369614282	31.7015347800951	24.4488707448344	10.4366173879481	FALSE	0	NA	NA	no	no	no	TRUE
ENST00000474176.2	TPD52L2	D0	D2	protein_coding	retained_intron	25.7118369614282	31.7015347800951	24.4488707448344	1.80570714527794	NA	0	NA	NA	NA	NA	NA	TRUE
ENST00000372102.3	TP53RK	D0	D2	protein_coding	protein_coding	7.40420133814104	8.88001313746761	8.05935279398825	1.93583469645384	FALSE	0	0.797308	TRUE	no	no	no	TRUE
ENST00000372114.4	TP53RK	D0	D2	protein_coding	protein_coding	7.40420133814104	8.88001313746761	8.05935279398825	5.4683666416872	FALSE	0	0.992084	TRUE	yes	no	no	TRUE
ENST00000402203.5	TNRC6B	D0	D2	protein_coding	protein_coding	30.9032095514251	31.3844193261495	24.7582170360114	3.255471353787	FALSE	0	1	TRUE	yes	no	yes	NA
ENST00000593046.5	TNNT1	D0	D2	protein_coding	protein_coding	128.49425589968	100.596706013753	138.417184626077	14.0041070981545	NA	0	0.316172	FALSE	NA	NA	NA	NA
ENST00000620307.4	TMSB15B	D0	D2	protein_coding	protein_coding	10.3304891262265	10.2494586879733	9.77579914611298	3.11817057829496	NA	0	0.0580265	FALSE	NA	NA	NA	FALSE
ENST00000309134.9	TMEM9B	D0	D2	protein_coding	protein_coding	7.5706629082102	7.42314283202105	5.40013738274473	0.424743176959316	FALSE	0	NA	NA	no	no	no	FALSE
ENST00000482378.6	TMEM198B	D0	D2	transcribed_unitary_pseudogene	processed_transcript	3.95355072149681	3.19015604669911	2.64171477498508	0.525278561161801	NA	2	0.474997	FALSE	NA	NA	NA	TRUE
ENST00000692833.1	TMEM198B	D0	D2	transcribed_unitary_pseudogene	processed_transcript	3.95355072149681	3.19015604669911	2.64171477498508	0.136936510861323	NA	0	0.0106908	FALSE	NA	NA	NA	TRUE
ENST00000534945.2	TMEM132B	D0	D2	protein_coding	retained_intron	16.8105901254774	35.1138528054809	3.64663585386525	1.7088779745693	NA	0	1	TRUE	NA	NA	NA	TRUE
ENST00000534983.5	TMEM132A	D0	D2	protein_coding	retained_intron	25.7806484305774	21.8933781578778	22.4643580449313	0.333719432186592	NA	0	1	TRUE	NA	NA	NA	NA
ENST00000437139.7	TMEM107	D0	D2	protein_coding	protein_coding	9.75471616396804	7.49489806567843	5.16979613367466	6.11467346079266	FALSE	0	0.728447	TRUE	yes	no	no	TRUE
ENST00000449985.6	TMEM107	D0	D2	protein_coding	protein_coding	9.75471616396804	7.49489806567843	5.16979613367466	1.55271044363344	NA	0	0.025651	FALSE	NA	NA	NA	TRUE
ENST00000442878.6	TJAP1	D0	D2	protein_coding	protein_coding	16.3723441983607	20.6718190201001	21.749186719493	1.10104443274459	NA	0	0.198243	FALSE	NA	NA	NA	NA
ENST00000489410.1	THEM4	D0	D2	protein_coding	protein_coding	13.0080004231526	8.91114765584381	12.400297124036	1.61161179038904	FALSE	0	NA	NA	no	no	no	TRUE
ENST00000469769.1	THBS3	D0	D2	protein_coding	retained_intron	6.40409650433492	2.52197390109058	3.91315150924505	0.839961272200882	NA	1	0.33076	FALSE	NA	NA	NA	TRUE
ENST00000498500.1	THBS3	D0	D2	protein_coding	retained_intron	6.40409650433492	2.52197390109058	3.91315150924505	2.42089857978666	NA	0	0.462921	FALSE	NA	NA	NA	TRUE
ENST00000486111.5	TFDP2	D0	D2	protein_coding	protein_coding	85.8615650841044	174.316739686478	52.4935367151776	7.05529163270072	FALSE	0	NA	NA	no	no	no	NA
ENST00000489671.6	TFDP2	D0	D2	protein_coding	protein_coding	85.8615650841044	174.316739686478	52.4935367151776	4.93294718596764	FALSE	0	NA	NA	no	no	no	NA
ENST00000376019.5	TEX30	D0	D2	protein_coding	protein_coding	9.09448374683412	11.8546451854609	9.80718593136696	1.76410649659627	FALSE	1	0.848193	TRUE	yes	no	no	TRUE
ENST00000518961.1	TERF1	D0	D2	protein_coding	retained_intron	122.826780331196	414.971506232556	45.5049071714095	6.42684528971131	NA	1	0.0368229	FALSE	NA	NA	NA	NA
ENST00000648252.1	TDRD3	D0	D2	protein_coding	protein_coding	23.0544418358008	23.9573793463379	17.810075332622	2.10623220909747	FALSE	0	1	TRUE	yes	no	yes	NA
ENST00000549550.1	TCHP	D0	D2	protein_coding	retained_intron	36.3318969691512	9.20231700278306	104.977552863531	4.62063927203365	NA	0	0.0356139	FALSE	NA	NA	NA	TRUE
ENST00000475236.1	TCEA2	D0	D2	protein_coding	processed_transcript	13.4278515910536	13.0804062742098	11.9031690970519	0.751758196224426	NA	1	0.416847	FALSE	NA	NA	NA	TRUE
ENST00000476113.1	TCEA2	D0	D2	protein_coding	processed_transcript	13.4278515910536	13.0804062742098	11.9031690970519	4.3034027286361	NA	1	0.022534	FALSE	NA	NA	NA	TRUE
ENST00000395224.7	TBX6	D0	D2	protein_coding	protein_coding	21.757547800565	1.16045616020379	49.6592624385801	3.90859996896916	FALSE	0	1	TRUE	yes	no	yes	TRUE
ENST00000553607.1	TBX6	D0	D2	protein_coding	protein_coding	21.757547800565	1.16045616020379	49.6592624385801	5.61109837806006	FALSE	1	0.999471	TRUE	yes	no	no	TRUE
ENST00000482419.1	TASOR2	D0	D2	protein_coding	protein_coding	47.6756101753913	51.6185612324182	44.7925328773061	14.7102234679268	NA	0	0.037349	FALSE	NA	NA	NA	TRUE
ENST00000527124.1	TASOR2	D0	D2	protein_coding	retained_intron	47.6756101753913	51.6185612324182	44.7925328773061	3.44044315762633	NA	0	0.0146635	FALSE	NA	NA	NA	TRUE
ENST00000645567.1	TASOR2	D0	D2	protein_coding	protein_coding	47.6756101753913	51.6185612324182	44.7925328773061	12.7760559255922	FALSE	0	1	TRUE	yes	no	yes	TRUE
ENST00000485156.1	TASOR	D0	D2	protein_coding	processed_transcript	45.6165114974284	56.4947809782693	41.23196328888	16.7049204872761	NA	0	0.0997624	FALSE	NA	NA	NA	TRUE
ENST00000493960.6	TASOR	D0	D2	protein_coding	protein_coding	45.6165114974284	56.4947809782693	41.23196328888	11.1280790206855	FALSE	0	1	TRUE	yes	no	yes	TRUE
ENST00000683822.1	TASOR	D0	D2	protein_coding	protein_coding	45.6165114974284	56.4947809782693	41.23196328888	9.49835520435657	FALSE	0	1	TRUE	yes	no	yes	TRUE
ENST00000683782.1	TAF1	D0	D2	protein_coding	protein_coding	31.3140193211352	25.8774674809314	36.9041963513245	5.87234673732866	FALSE	1	1	TRUE	yes	no	yes	NA
ENST00000618829.4	SYNRG	D0	D2	protein_coding	retained_intron	17.2869948177093	14.7794602899639	14.4788326338705	1.50035177062394	NA	0	1	TRUE	NA	NA	NA	NA
ENST00000621136.4	SYNRG	D0	D2	protein_coding	protein_coding	17.2869948177093	14.7794602899639	14.4788326338705	2.0704051606816	FALSE	0	1	TRUE	no	no	yes	NA
ENST00000234668.6	SYDE2	D0	D2	protein_coding	retained_intron	10.4907381994667	8.25854283218205	3.93035684783777	5.40769316498676	NA	0	1	TRUE	NA	NA	NA	TRUE
ENST00000341460.6	SYDE2	D0	D2	protein_coding	protein_coding	10.4907381994667	8.25854283218205	3.93035684783777	5.08304503447991	FALSE	0	1	TRUE	yes	no	yes	TRUE
ENST00000594729.5	SUPT5H	D0	D2	protein_coding	protein_coding	60.890240880919	93.2442850914543	60.2393103095643	17.7978341231677	NA	0	0.0551421	FALSE	NA	NA	NA	TRUE
ENST00000598725.5	SUPT5H	D0	D2	protein_coding	protein_coding	60.890240880919	93.2442850914543	60.2393103095643	9.54394077972727	FALSE	0	1	TRUE	yes	no	yes	TRUE
ENST00000601515.5	SUPT5H	D0	D2	protein_coding	protein_coding	60.890240880919	93.2442850914543	60.2393103095643	6.67514636076382	NA	0	0.0619803	FALSE	NA	NA	NA	TRUE
ENST00000656446.1	SUCLG2-AS1	D0	D2	lncRNA	lncRNA	7.26660385414125	5.28187905610725	9.25982271760555	2.37132725471268	NA	0	0.108793	FALSE	NA	NA	NA	FALSE
ENST00000659899.1	SUCLG2-AS1	D0	D2	lncRNA	lncRNA	7.26660385414125	5.28187905610725	9.25982271760555	2.00193653252167	NA	0	0.101237	FALSE	NA	NA	NA	FALSE
ENST00000312283.12	STX16	D0	D2	protein_coding	protein_coding	45.2322695997247	45.7684272751128	65.4821533983561	7.36965369237235	NA	0	0.300571	FALSE	NA	NA	NA	TRUE
ENST00000467096.5	STX16	D0	D2	protein_coding	nonsense_mediated_decay	45.2322695997247	45.7684272751128	65.4821533983561	15.7034386172906	TRUE	0	0.958371	TRUE	no	no	no	TRUE
ENST00000553821.3	STON2	D0	D2	protein_coding	protein_coding	13.8517159998803	14.3600650270584	23.714663616181	2.50247200595558	FALSE	0	1	TRUE	yes	no	yes	FALSE
ENST00000556280.1	STON2	D0	D2	protein_coding	processed_transcript	13.8517159998803	14.3600650270584	23.714663616181	1.27812369442447	NA	0	0.0681336	FALSE	NA	NA	NA	FALSE
ENST00000614646.5	STON2	D0	D2	protein_coding	protein_coding	13.8517159998803	14.3600650270584	23.714663616181	9.37265941373753	FALSE	0	1	TRUE	yes	no	yes	FALSE
ENST00000396672.5	STK33	D0	D2	protein_coding	protein_coding	22.0622404229797	31.3818258796916	22.5694015956261	0.949617664838372	FALSE	1	1	TRUE	yes	no	yes	TRUE
ENST00000447869.5	STK33	D0	D2	protein_coding	protein_coding	22.0622404229797	31.3818258796916	22.5694015956261	1.1598298192214	FALSE	1	1	TRUE	yes	no	yes	TRUE
ENST00000486305.6	STK33	D0	D2	protein_coding	retained_intron	22.0622404229797	31.3818258796916	22.5694015956261	3.12006209984755	NA	0	0.999999	TRUE	NA	NA	NA	TRUE
ENST00000394629.2	STEAP2	D0	D2	protein_coding	protein_coding	5.36302033658899	13.7663338305815	2.98067016834765	0.415818050773926	FALSE	0	1	TRUE	yes	no	no	NA
ENST00000414116.1	STEAP1B	D0	D2	protein_coding	processed_transcript	18.9398921348794	4.81359586914763	22.4692556741577	1.86957651234354	NA	2	0.0616376	FALSE	NA	NA	NA	TRUE
ENST00000678116.1	STEAP1B	D0	D2	protein_coding	protein_coding	18.9398921348794	4.81359586914763	22.4692556741577	4.60317025069493	FALSE	0	0.999922	TRUE	yes	no	no	TRUE
ENST00000422690.5	STAG3	D0	D2	protein_coding	protein_coding	6.05863803765427	4.7868696846953	4.64248490094196	0.384798214641316	NA	0	0.138893	FALSE	NA	NA	NA	TRUE
ENST00000451963.1	STAG3	D0	D2	protein_coding	nonsense_mediated_decay	6.05863803765427	4.7868696846953	4.64248490094196	3.698056877608	TRUE	0	0.990409	TRUE	no	no	yes	TRUE
ENST00000361686.8	ST6GAL2	D0	D2	protein_coding	protein_coding	5.51211657434338	7.96950445833833	3.46143010479519	0.926129162744691	FALSE	0	NA	NA	no	no	no	FALSE
ENST00000371319.8	SSBP3	D0	D2	protein_coding	protein_coding	24.434521442885	33.6136060975442	19.6108145980529	2.49611973468396	FALSE	0	0.999996	TRUE	yes	no	yes	TRUE
ENST00000426150.5	SSBP3	D0	D2	protein_coding	processed_transcript	24.434521442885	33.6136060975442	19.6108145980529	2.997179662362	NA	0	0.452515	FALSE	NA	NA	NA	TRUE
ENST00000409276.5	SRSF7	D0	D2	protein_coding	protein_coding	152.35750078713	199.555104694478	172.726023427301	57.476839566487	FALSE	0	0.999315	TRUE	yes	no	yes	NA
ENST00000443213.5	SRSF7	D0	D2	protein_coding	nonsense_mediated_decay	152.35750078713	199.555104694478	172.726023427301	28.3547346173885	TRUE	2	0.940477	TRUE	yes	no	no	NA
ENST00000477635.5	SRSF7	D0	D2	protein_coding	retained_intron	152.35750078713	199.555104694478	172.726023427301	17.1658147019354	NA	0	0.0110959	FALSE	NA	NA	NA	NA
ENST00000490889.2	SRGAP3	D0	D2	protein_coding	processed_transcript	5.48265465565664	5.32573245301623	3.41227644210545	1.08123123191692	NA	0	0.00761938	FALSE	NA	NA	NA	FALSE
ENST00000630804.2	SPTAN1	D0	D2	protein_coding	protein_coding	96.4977600743031	97.9947394037965	77.0637205236116	13.3201011319055	FALSE	0	1	TRUE	yes	no	yes	NA
ENST00000675360.1	SPRY3	D0	D2	protein_coding	protein_coding	1.74740054277134	1.64479184745352	2.58966886833489	0.451310629274159	FALSE	0	0.998815	TRUE	yes	no	no	TRUE
ENST00000676089.1	SPRY3	D0	D2	protein_coding	processed_transcript	1.74740054277134	1.64479184745352	2.58966886833489	0.608733760297907	NA	0	0.00865849	FALSE	NA	NA	NA	TRUE
ENST00000374906.4	SPIN2A	D0	D2	protein_coding	protein_coding	3.58351685978455	4.54677130195929	3.76490119777768	0.772767374436364	FALSE	1	0.999951	TRUE	yes	no	yes	TRUE
ENST00000374908.1	SPIN2A	D0	D2	protein_coding	protein_coding	3.58351685978455	4.54677130195929	3.76490119777768	2.41216837156559	FALSE	1	0.99881	TRUE	yes	no	yes	TRUE
ENST00000426431.2	SP1	D0	D2	protein_coding	protein_coding	51.503849516351	46.4122492830593	61.8980632552101	24.1286146659266	FALSE	0	1	TRUE	yes	no	yes	TRUE
ENST00000548560.1	SP1	D0	D2	protein_coding	protein_coding	51.503849516351	46.4122492830593	61.8980632552101	17.710965450267	NA	0	0.437434	FALSE	NA	NA	NA	TRUE
ENST00000368843.8	SNX27	D0	D2	protein_coding	protein_coding	32.4771766467992	47.29913759596	33.1038946976498	5.71584666929572	FALSE	1	1	TRUE	yes	no	yes	TRUE
ENST00000647454.1	SNX27	D0	D2	protein_coding	retained_intron	32.4771766467992	47.29913759596	33.1038946976498	7.45468226762679	NA	0	0.621784	TRUE	NA	NA	NA	TRUE
ENST00000221448.9	SNRNP70	D0	D2	protein_coding	protein_coding	142.129306634439	216.735831223639	111.267648005566	23.9782887746865	FALSE	0	0.999963	TRUE	yes	no	yes	TRUE
ENST00000544278.2	SNRNP70	D0	D2	protein_coding	retained_intron	142.129306634439	216.735831223639	111.267648005566	7.44473669329596	NA	0	0.866574	TRUE	NA	NA	NA	TRUE
ENST00000598441.6	SNRNP70	D0	D2	protein_coding	protein_coding	142.129306634439	216.735831223639	111.267648005566	42.8007463427161	FALSE	0	0.999971	TRUE	yes	no	yes	TRUE
ENST00000668354.1	SNHG7	D0	D2	lncRNA	lncRNA	32.7873079956389	21.6618812727441	52.1743489210925	1.43466803958094	NA	2	0.200867	FALSE	NA	NA	NA	TRUE
ENST00000520944.6	SNHG6	D0	D2	lncRNA	lncRNA	244.499688772181	234.682926011145	269.821021186642	177.829688825801	NA	0	0.00926526	FALSE	NA	NA	NA	NA
ENST00000521399.6	SNHG6	D0	D2	lncRNA	lncRNA	244.499688772181	234.682926011145	269.821021186642	32.2627653699756	NA	0	0.00772034	FALSE	NA	NA	NA	NA
ENST00000497774.6	SNHG29	D0	D2	lncRNA	retained_intron	389.482717410987	364.617946597099	409.804958999542	21.1926056628683	NA	3	0.0545443	FALSE	NA	NA	NA	NA
ENST00000667979.2	SNHG29	D0	D2	lncRNA	lncRNA	389.482717410987	364.617946597099	409.804958999542	48.3018516207077	NA	1	0.0534289	FALSE	NA	NA	NA	NA
ENST00000380821.8	SNAPC3	D0	D2	protein_coding	protein_coding	65.0183002875955	53.4809431486878	79.0396038361025	19.7543766731404	FALSE	0	1	TRUE	yes	no	no	TRUE
ENST00000490969.5	SNAPC3	D0	D2	protein_coding	nonsense_mediated_decay	65.0183002875955	53.4809431486878	79.0396038361025	20.3732937763523	TRUE	0	1	TRUE	yes	no	no	TRUE
ENST00000369570.4	SMIM8	D0	D2	protein_coding	retained_intron	11.4548244203412	10.7047468801962	8.79492370911181	0.892431365214257	NA	0	0.0629993	FALSE	NA	NA	NA	FALSE
ENST00000369572.3	SMIM8	D0	D2	protein_coding	processed_transcript	11.4548244203412	10.7047468801962	8.79492370911181	0.495447718235309	NA	0	0.333813	FALSE	NA	NA	NA	FALSE
ENST00000448282.6	SMIM8	D0	D2	protein_coding	nonsense_mediated_decay	11.4548244203412	10.7047468801962	8.79492370911181	1.34423486043414	NA	0	0.132223	FALSE	NA	NA	NA	FALSE
ENST00000608535.1	SMIM8	D0	D2	protein_coding	retained_intron	11.4548244203412	10.7047468801962	8.79492370911181	0.817989892276363	NA	0	0.0275598	FALSE	NA	NA	NA	FALSE
ENST00000524758.1	SLC7A8	D0	D2	protein_coding	protein_coding	26.1521694057729	56.9961052997318	13.0418559803652	2.52672610825574	NA	0	0.0469602	FALSE	NA	NA	NA	TRUE
ENST00000525062.1	SLC7A8	D0	D2	protein_coding	protein_coding	26.1521694057729	56.9961052997318	13.0418559803652	4.44775636832404	NA	0	0.0376025	FALSE	NA	NA	NA	TRUE
ENST00000397778.7	SLC66A2	D0	D2	protein_coding	protein_coding	2.8423742637938	2.4982622702252	2.58501172987913	0.354000881077786	FALSE	0	0.999456	TRUE	yes	no	no	NA
ENST00000590895.1	SLC66A2	D0	D2	protein_coding	processed_transcript	2.8423742637938	2.4982622702252	2.58501172987913	0.293411635773223	NA	0	0.5	TRUE	NA	NA	NA	NA
ENST00000634937.1	SLC44A3-AS1	D0	D2	transcribed_processed_pseudogene	processed_transcript	3.74179288012653	3.60825026463562	3.65028281542255	0.229322921157669	NA	0	0.109712	FALSE	NA	NA	NA	FALSE
ENST00000407327.8	SLC44A2	D0	D2	protein_coding	protein_coding	34.1222739729314	44.8162700123769	32.1410819035447	8.60504487291622	FALSE	2	NA	NA	no	no	no	FALSE
ENST00000535296.5	SLC3A2	D0	D2	protein_coding	protein_coding	151.285242580645	194.924855226611	255.517479868243	7.12400273080983	FALSE	2	1	TRUE	yes	no	yes	NA
ENST00000458054.1	SLC39A10	D0	D2	protein_coding	protein_coding	128.077257954011	215.411793563457	129.187936228121	11.246164993554	NA	0	0.0697494	FALSE	NA	NA	NA	TRUE
ENST00000644224.2	SLC19A3	D0	D2	protein_coding	protein_coding	1.71930254751262	4.09403288807067	1.64949269102788	0.431077218045319	FALSE	1	1	TRUE	yes	no	no	TRUE
ENST00000416193.5	SLC16A1-AS1	D0	D2	lncRNA	lncRNA	13.3234873507475	9.08155612083587	13.9838243682912	0.700198026941527	NA	0	0.105653	FALSE	NA	NA	NA	NA
ENST00000664314.1	SLC16A1-AS1	D0	D2	lncRNA	lncRNA	13.3234873507475	9.08155612083587	13.9838243682912	0.527782645414134	NA	0	0.0692203	FALSE	NA	NA	NA	NA
ENST00000559664.5	SLC12A6	D0	D2	protein_coding	nonsense_mediated_decay	8.99899185353537	6.71063249374206	6.31858306619796	1.23460544455344	TRUE	1	NA	NA	no	no	no	TRUE
ENST00000651600.1	SLC10A3	D0	D2	protein_coding	protein_coding	2.08762544925427	2.41631629853246	1.49251507640869	0.929162662666239	FALSE	2	NA	NA	no	no	no	TRUE
ENST00000375300.6	SIK3	D0	D2	protein_coding	protein_coding	17.7533203325499	12.3003796822467	21.2064400167489	2.12472858163003	FALSE	0	1	TRUE	yes	no	yes	FALSE
ENST00000445177.6	SIK3	D0	D2	protein_coding	protein_coding	17.7533203325499	12.3003796822467	21.2064400167489	3.43338771279431	FALSE	0	1	TRUE	yes	no	yes	FALSE
ENST00000328923.8	SHMT2	D0	D2	protein_coding	protein_coding	112.102971382066	102.856454907984	196.672058963895	62.6501802190082	FALSE	0	1	TRUE	yes	no	no	TRUE
ENST00000449049.7	SHMT2	D0	D2	protein_coding	protein_coding	112.102971382066	102.856454907984	196.672058963895	10.4980675179628	FALSE	0	1	TRUE	yes	no	yes	TRUE
ENST00000553474.5	SHMT2	D0	D2	protein_coding	protein_coding	112.102971382066	102.856454907984	196.672058963895	10.0469379173834	FALSE	0	1	TRUE	yes	no	yes	TRUE
ENST00000687380.1	SH3PXD2A	D0	D2	protein_coding	protein_coding	11.7690428101585	5.69267414350702	9.25235015919996	2.11484409431946	NA	0	0.183537	FALSE	NA	NA	NA	TRUE
ENST00000692756.1	SH3PXD2A	D0	D2	protein_coding	processed_transcript	11.7690428101585	5.69267414350702	9.25235015919996	1.14109350323383	NA	0	1	TRUE	NA	NA	NA	TRUE
ENST00000437425.7	SGCE	D0	D2	protein_coding	protein_coding	30.1230462410626	23.8382937873125	20.9771652361937	1.18486776568023	FALSE	0	1	TRUE	yes	no	no	TRUE
ENST00000645665.1	SGCE	D0	D2	protein_coding	retained_intron	30.1230462410626	23.8382937873125	20.9771652361937	2.91238031031112	NA	0	0.178089	FALSE	NA	NA	NA	TRUE
ENST00000646559.1	SGCE	D0	D2	protein_coding	nonsense_mediated_decay	30.1230462410626	23.8382937873125	20.9771652361937	0.276401749621931	TRUE	0	1	TRUE	no	no	no	TRUE
ENST00000475630.5	SFXN5	D0	D2	protein_coding	processed_transcript	7.63574532968529	13.3258793129996	7.27951443087915	0.700014855158541	NA	0	0.0365495	FALSE	NA	NA	NA	FALSE
ENST00000484123.1	SFXN5	D0	D2	protein_coding	processed_transcript	7.63574532968529	13.3258793129996	7.27951443087915	2.04907729012602	NA	0	0.0417235	FALSE	NA	NA	NA	FALSE
ENST00000409915.8	SF3B1	D0	D2	protein_coding	nonsense_mediated_decay	266.26403205077	352.496597626002	238.693658073894	15.5938000973065	TRUE	0	NA	NA	no	no	no	NA
ENST00000358065.5	SETMAR	D0	D2	protein_coding	protein_coding	10.8888039711128	11.3930342126917	12.0269690593552	3.05546654032301	FALSE	1	1	TRUE	yes	no	no	TRUE
ENST00000479538.1	SETD5	D0	D2	protein_coding	processed_transcript	209.806341121983	212.038319137194	104.104108292421	84.4193261916286	NA	0	0.315101	FALSE	NA	NA	NA	NA
ENST00000686840.1	SET	D0	D2	protein_coding	protein_coding	1554.13894960467	2639.92749141499	1804.41272288066	289.958295133247	FALSE	0	0.999999	TRUE	yes	no	yes	NA
ENST00000254722.9	SERPINF1	D0	D2	protein_coding	protein_coding	19.186801623487	27.1254532745515	11.3473804160024	7.5773413198885	FALSE	0	1	TRUE	yes	yes	no	TRUE
ENST00000570820.1	SERPINF1	D0	D2	protein_coding	retained_intron	19.186801623487	27.1254532745515	11.3473804160024	1.03110476477613	NA	0	0.032963	FALSE	NA	NA	NA	TRUE
ENST00000577053.1	SERPINF1	D0	D2	protein_coding	protein_coding	19.186801623487	27.1254532745515	11.3473804160024	1.41154960170609	NA	0	0.0791794	FALSE	NA	NA	NA	TRUE
ENST00000530613.5	SERGEF	D0	D2	protein_coding	protein_coding	16.2554188356318	19.5295895395816	15.5731641915478	1.69946160391481	NA	0	0.150924	FALSE	NA	NA	NA	FALSE
ENST00000589889.1	SEMA6B	D0	D2	protein_coding	retained_intron	15.1312914562193	17.36737956701	16.7131747423771	12.2682525774103	NA	0	0.0631143	FALSE	NA	NA	NA	TRUE
ENST00000264454.8	SEC22C	D0	D2	protein_coding	protein_coding	21.1454163579033	26.1303343522698	22.5451466788908	6.27780249480409	FALSE	0	0.999908	TRUE	yes	no	no	TRUE
ENST00000273156.11	SEC22C	D0	D2	protein_coding	protein_coding	21.1454163579033	26.1303343522698	22.5451466788908	2.57513437782175	FALSE	0	0.999908	TRUE	yes	no	no	TRUE
ENST00000487701.1	SEC22C	D0	D2	protein_coding	retained_intron	21.1454163579033	26.1303343522698	22.5451466788908	5.48736713478297	NA	0	0.00661717	FALSE	NA	NA	NA	TRUE
ENST00000290037.10	SEC16A	D0	D2	protein_coding	protein_coding	8.85637239426446	11.0903440491895	7.9907168964201	1.8491031979991	FALSE	1	NA	NA	no	no	no	FALSE
ENST00000684972.1	SDHAP3	D0	D2	transcribed_unprocessed_pseudogene	processed_transcript	15.9343867114623	6.4026329446398	12.4296774117818	0.235091905476461	NA	0	0.189948	FALSE	NA	NA	NA	FALSE
ENST00000689786.1	SDHAP3	D0	D2	transcribed_unprocessed_pseudogene	processed_transcript	15.9343867114623	6.4026329446398	12.4296774117818	5.16849899019437	NA	0	0.391006	FALSE	NA	NA	NA	FALSE
ENST00000264932.11	SDHA	D0	D2	protein_coding	protein_coding	76.4417596002221	71.8908671990592	38.7814740076202	22.884601138991	FALSE	1	1	TRUE	yes	no	no	TRUE
ENST00000503674.5	SDHA	D0	D2	protein_coding	retained_intron	76.4417596002221	71.8908671990592	38.7814740076202	7.36844902755803	NA	0	0.979998	TRUE	NA	NA	NA	TRUE
ENST00000507266.1	SDHA	D0	D2	protein_coding	retained_intron	76.4417596002221	71.8908671990592	38.7814740076202	4.75428407869328	NA	1	0.0920684	FALSE	NA	NA	NA	TRUE
ENST00000509420.5	SDHA	D0	D2	protein_coding	retained_intron	76.4417596002221	71.8908671990592	38.7814740076202	10.5228918015265	NA	0	0.0960367	FALSE	NA	NA	NA	TRUE
ENST00000476722.6	SDCCAG8	D0	D2	protein_coding	protein_coding	21.618445853419	17.9760273246615	13.5371608467093	1.22109438749589	NA	0	0.463741	FALSE	NA	NA	NA	TRUE
ENST00000497459.1	SDCCAG8	D0	D2	protein_coding	processed_transcript	21.618445853419	17.9760273246615	13.5371608467093	3.02494993361742	NA	0	0.0295796	FALSE	NA	NA	NA	TRUE
ENST00000536176.1	SCNN1A	D0	D2	protein_coding	processed_transcript	15.8441628632852	47.1655418094269	8.55581652537635	5.33253207746405	NA	0	0.141806	FALSE	NA	NA	NA	TRUE
ENST00000538979.5	SCNN1A	D0	D2	protein_coding	processed_transcript	15.8441628632852	47.1655418094269	8.55581652537635	0.90783153215866	NA	0	0.117121	FALSE	NA	NA	NA	TRUE
ENST00000454569.6	SCN9A	D0	D2	protein_coding	protein_coding	4.67115470872191	7.72094078695694	2.93471311962195	1.6763338966382	FALSE	0	1	TRUE	yes	no	yes	TRUE
ENST00000646694.1	SCN9A	D0	D2	protein_coding	retained_intron	4.67115470872191	7.72094078695694	2.93471311962195	1.33361764570615	NA	0	1	TRUE	NA	NA	NA	TRUE
ENST00000273908.4	SCD5	D0	D2	protein_coding	protein_coding	6.64963923441766	2.40567727456326	3.79557364075433	1.99399632630849	FALSE	0	0.995325	TRUE	no	no	no	TRUE
ENST00000319540.9	SCD5	D0	D2	protein_coding	protein_coding	6.64963923441766	2.40567727456326	3.79557364075433	4.65564290810918	FALSE	0	0.999771	TRUE	yes	no	no	TRUE
ENST00000585335.1	SCAMP4	D0	D2	protein_coding	processed_transcript	6.31944535700198	8.11302415995604	7.11225002810177	1.31909944250996	NA	0	0.193723	FALSE	NA	NA	NA	TRUE
ENST00000588555.1	SCAMP4	D0	D2	protein_coding	retained_intron	6.31944535700198	8.11302415995604	7.11225002810177	0.568690646858596	NA	0	0.106613	FALSE	NA	NA	NA	TRUE
ENST00000504242.1	SAR1B	D0	D2	protein_coding	processed_transcript	26.4976724214586	34.8823833704263	18.3271001497967	1.1283001145117	NA	0	0.0134267	FALSE	NA	NA	NA	TRUE
ENST00000508363.5	SAR1B	D0	D2	protein_coding	retained_intron	26.4976724214586	34.8823833704263	18.3271001497967	5.95400513897692	NA	1	0.654388	TRUE	NA	NA	NA	TRUE
ENST00000509937.5	SAR1B	D0	D2	protein_coding	protein_coding	26.4976724214586	34.8823833704263	18.3271001497967	7.60040559863034	FALSE	0	0.923323	TRUE	yes	no	no	TRUE
ENST00000483130.1	SALL4	D0	D2	protein_coding	processed_transcript	45.0942276345499	53.7634452256016	67.601718389139	4.19068553925543	NA	0	0.0265579	FALSE	NA	NA	NA	NA
ENST00000537592.7	SALL3	D0	D2	protein_coding	protein_coding	15.3743320980861	29.2756923139828	18.0249434472763	6.0811260335303	FALSE	1	NA	NA	no	no	no	TRUE
ENST00000573324.1	SALL3	D0	D2	protein_coding	protein_coding	15.3743320980861	29.2756923139828	18.0249434472763	8.87104681692468	NA	0	NA	NA	NA	NA	NA	TRUE
ENST00000537235.2	SALL2	D0	D2	protein_coding	protein_coding	44.6196165350567	111.304782180063	30.05857874969	34.2909216513402	FALSE	2	1	TRUE	yes	no	yes	FALSE
ENST00000614342.1	SALL2	D0	D2	protein_coding	protein_coding	44.6196165350567	111.304782180063	30.05857874969	5.87219537367637	FALSE	2	1	TRUE	yes	no	yes	FALSE
ENST00000683367.1	SACS	D0	D2	protein_coding	protein_coding	27.3941254770008	35.7424827614763	29.6093315750924	1.34967077627139	FALSE	0	1	TRUE	yes	no	no	TRUE
ENST00000368352.10	RUSC1	D0	D2	protein_coding	protein_coding	4.50292521726331	6.29832338311346	4.72737320699041	1.01903139184946	FALSE	1	1	TRUE	yes	no	yes	TRUE
ENST00000344591.8	RSRC2	D0	D2	protein_coding	protein_coding	220.539588569356	395.643932738421	192.392564377394	5.68590142667595	NA	0	0.289444	FALSE	NA	NA	NA	FALSE
ENST00000525335.6	RSRC2	D0	D2	protein_coding	retained_intron	220.539588569356	395.643932738421	192.392564377394	16.2971009366457	NA	1	0.819589	TRUE	NA	NA	NA	FALSE
ENST00000531639.5	RSRC2	D0	D2	protein_coding	retained_intron	220.539588569356	395.643932738421	192.392564377394	13.2901957696785	NA	0	0.0170898	FALSE	NA	NA	NA	FALSE
ENST00000357802.7	RRP7BP	D0	D2	transcribed_unprocessed_pseudogene	processed_transcript	15.2834248815628	16.3208386146982	13.7332052454532	5.30713755625234	NA	0	0.416857	FALSE	NA	NA	NA	TRUE
ENST00000458605.6	RRP7BP	D0	D2	transcribed_unprocessed_pseudogene	processed_transcript	15.2834248815628	16.3208386146982	13.7332052454532	4.53300100470659	NA	0	0.314419	FALSE	NA	NA	NA	TRUE
ENST00000377813.6	RRBP1	D0	D2	protein_coding	protein_coding	84.3195528093945	105.463460546828	84.6809388315833	21.2103150365693	FALSE	1	1	TRUE	yes	no	yes	FALSE
ENST00000272317.11	RPS27A	D0	D2	protein_coding	protein_coding	1385.26092977407	1892.24083366068	1322.59924171	1225.77519449061	FALSE	0	0.98362	TRUE	yes	no	no	NA
ENST00000404735.1	RPS27A	D0	D2	protein_coding	protein_coding	1385.26092977407	1892.24083366068	1322.59924171	128.947241896478	FALSE	1	0.920957	TRUE	yes	no	no	NA
ENST00000372360.9	RPS24	D0	D2	protein_coding	protein_coding	3658.19544984369	4605.68579578923	3174.27581056961	2739.99595164572	FALSE	0	0.857642	TRUE	yes	no	yes	NA
ENST00000482069.5	RPS24	D0	D2	protein_coding	processed_transcript	3658.19544984369	4605.68579578923	3174.27581056961	242.587544999281	NA	0	0.46386	FALSE	NA	NA	NA	NA
ENST00000355731.8	RPL23A	D0	D2	protein_coding	protein_coding	1586.99080051379	1809.420441361	1537.73812743504	651.896041717231	NA	0	0.15719	FALSE	NA	NA	NA	TRUE
ENST00000422514.7	RPL23A	D0	D2	protein_coding	protein_coding	1586.99080051379	1809.420441361	1537.73812743504	633.212070246439	FALSE	0	0.964748	TRUE	yes	no	yes	TRUE
ENST00000463836.1	RPL22L1	D0	D2	protein_coding	protein_coding	113.143544948851	268.85060016869	100.604947182854	62.8819927117176	FALSE	0	0.84901	TRUE	yes	no	no	TRUE
ENST00000475836.5	RPL22L1	D0	D2	protein_coding	nonsense_mediated_decay	113.143544948851	268.85060016869	100.604947182854	44.921108125545	NA	0	0.0683759	FALSE	NA	NA	NA	TRUE
ENST00000358395.11	RNF24	D0	D2	protein_coding	protein_coding	12.2500391610245	5.15341056850947	26.1936374966357	5.35580523210737	NA	0	0.308015	FALSE	NA	NA	NA	TRUE
ENST00000470498.1	RNF220	D0	D2	protein_coding	processed_transcript	41.6116258888124	60.8260993123661	52.3221259219665	1.68998808833007	NA	0	0.00818778	FALSE	NA	NA	NA	NA
ENST00000471494.5	RNF220	D0	D2	protein_coding	processed_transcript	41.6116258888124	60.8260993123661	52.3221259219665	4.10515037730321	NA	0	0.0802661	FALSE	NA	NA	NA	NA
ENST00000356143.5	RNF14	D0	D2	protein_coding	protein_coding	25.1059751980906	22.4313138124466	19.8945429822618	1.28249287279561	FALSE	0	1	TRUE	yes	no	no	TRUE
ENST00000394520.7	RNF14	D0	D2	protein_coding	protein_coding	25.1059751980906	22.4313138124466	19.8945429822618	2.83116422892444	FALSE	0	1	TRUE	yes	no	no	TRUE
ENST00000263895.9	RND3	D0	D2	protein_coding	protein_coding	97.6654085756401	133.209494579402	59.6348518970324	32.8671418417243	FALSE	0	0.998458	TRUE	yes	no	no	TRUE
ENST00000333942.10	RHOT1	D0	D2	protein_coding	protein_coding	53.9173939907468	79.8720809123772	35.1715812862153	3.71600021671384	FALSE	0	NA	NA	no	no	no	TRUE
ENST00000354266.7	RHOT1	D0	D2	protein_coding	protein_coding	53.9173939907468	79.8720809123772	35.1715812862153	4.29535830874519	FALSE	0	NA	NA	no	no	no	TRUE
ENST00000394692.6	RHOT1	D0	D2	protein_coding	protein_coding	53.9173939907468	79.8720809123772	35.1715812862153	6.53142481177963	FALSE	0	NA	NA	no	no	no	TRUE
ENST00000578205.5	RHOT1	D0	D2	protein_coding	nonsense_mediated_decay	53.9173939907468	79.8720809123772	35.1715812862153	11.8051517620799	TRUE	0	NA	NA	no	no	no	TRUE
ENST00000303088.9	RFXANK	D0	D2	protein_coding	protein_coding	12.8155788630016	11.5464160358957	14.1837005214651	1.54379769606018	FALSE	0	0.999995	TRUE	yes	no	yes	FALSE
ENST00000392324.8	RFXANK	D0	D2	protein_coding	protein_coding	12.8155788630016	11.5464160358957	14.1837005214651	1.39307102881732	FALSE	0	0.999978	TRUE	yes	no	yes	FALSE
ENST00000452621.6	RCOR3	D0	D2	protein_coding	protein_coding	32.5763816222697	21.6014570669356	31.1136893603495	3.0507289805541	FALSE	0	1	TRUE	yes	no	yes	NA
ENST00000485186.1	RCOR3	D0	D2	protein_coding	nonsense_mediated_decay	32.5763816222697	21.6014570669356	31.1136893603495	2.06524693826785	NA	0	0.0262821	FALSE	NA	NA	NA	NA
ENST00000528066.1	RCOR3	D0	D2	protein_coding	retained_intron	32.5763816222697	21.6014570669356	31.1136893603495	4.82644206612579	NA	0	0.0112487	FALSE	NA	NA	NA	NA
ENST00000373832.5	RCC1	D0	D2	protein_coding	protein_coding	38.5197169355469	57.5541264930484	46.1774473779631	3.84356262091456	FALSE	0	1	TRUE	yes	no	yes	NA
ENST00000588161.5	RBM42	D0	D2	protein_coding	protein_coding	12.9903909645523	22.4731626853454	12.3033787078063	4.22353348756914	FALSE	0	1	TRUE	yes	no	yes	FALSE
ENST00000403687.8	RASGRP3	D0	D2	protein_coding	protein_coding	29.1183124518778	2.14888500784593	29.526566530954	9.8882756780774	FALSE	0	1	TRUE	yes	no	yes	TRUE
ENST00000407811.5	RASGRP3	D0	D2	protein_coding	protein_coding	29.1183124518778	2.14888500784593	29.526566530954	2.23571189779393	FALSE	0	1	TRUE	yes	no	yes	TRUE
ENST00000482857.5	RASGRP3	D0	D2	protein_coding	retained_intron	29.1183124518778	2.14888500784593	29.526566530954	4.21558094053134	NA	0	0.221404	FALSE	NA	NA	NA	TRUE
ENST00000484909.5	RASGRP3	D0	D2	protein_coding	retained_intron	29.1183124518778	2.14888500784593	29.526566530954	1.86046410883755	NA	0	0.0961054	FALSE	NA	NA	NA	TRUE
ENST00000494927.1	RASGRP3	D0	D2	protein_coding	retained_intron	29.1183124518778	2.14888500784593	29.526566530954	2.1664791998855	NA	0	0.0445398	FALSE	NA	NA	NA	TRUE
ENST00000461209.5	RASA4	D0	D2	protein_coding	protein_coding	3.32399048247755	1.83223853031833	3.33631781032171	0.663911252559472	FALSE	0	1	TRUE	yes	no	no	TRUE
ENST00000521822.1	RASA4	D0	D2	protein_coding	processed_transcript	3.32399048247755	1.83223853031833	3.33631781032171	0.491718839152667	NA	0	0.237091	FALSE	NA	NA	NA	TRUE
ENST00000502485.1	RAPGEF2	D0	D2	protein_coding	processed_transcript	90.0258923045439	80.9378998365823	55.5942215185922	3.27395569213035	NA	0	0.252144	FALSE	NA	NA	NA	NA
ENST00000505478.5	RAPGEF2	D0	D2	protein_coding	processed_transcript	90.0258923045439	80.9378998365823	55.5942215185922	15.9583524270907	NA	0	0.682364	TRUE	NA	NA	NA	NA
ENST00000319107.8	RALGPS1	D0	D2	protein_coding	protein_coding	7.16592447103826	14.1881601777264	5.46366091408619	0.677105502034554	NA	0	0.195488	FALSE	NA	NA	NA	TRUE
ENST00000316856.7	RAD23A	D0	D2	protein_coding	protein_coding	26.6544229664986	40.5246833217784	24.5548386963662	11.115019406178	FALSE	0	NA	NA	no	no	no	FALSE
ENST00000586534.6	RAD23A	D0	D2	protein_coding	protein_coding	26.6544229664986	40.5246833217784	24.5548386963662	10.1380581312405	FALSE	0	NA	NA	no	no	no	FALSE
ENST00000591467.1	RAD23A	D0	D2	protein_coding	retained_intron	26.6544229664986	40.5246833217784	24.5548386963662	1.36877639243248	NA	0	NA	NA	NA	NA	NA	FALSE
ENST00000319942.8	RABGGTB	D0	D2	protein_coding	protein_coding	216.62825555456	242.576143289668	280.793136856939	49.6195890969684	FALSE	0	NA	NA	no	no	no	NA
ENST00000467748.1	RABGGTB	D0	D2	protein_coding	processed_transcript	216.62825555456	242.576143289668	280.793136856939	15.3698186476631	NA	0	NA	NA	NA	NA	NA	NA
ENST00000496055.5	RABGGTB	D0	D2	protein_coding	processed_transcript	216.62825555456	242.576143289668	280.793136856939	26.2616632729282	NA	4	NA	NA	NA	NA	NA	NA
ENST00000251507.8	RABGAP1L	D0	D2	protein_coding	protein_coding	91.7040982861562	223.943451000635	35.0448613964598	7.5679077292654	FALSE	0	1	TRUE	yes	no	yes	TRUE
ENST00000367688.3	RABGAP1L	D0	D2	protein_coding	protein_coding	91.7040982861562	223.943451000635	35.0448613964598	5.30012777716988	FALSE	0	0.999983	TRUE	no	no	no	TRUE
ENST00000392064.6	RABGAP1L	D0	D2	protein_coding	protein_coding	91.7040982861562	223.943451000635	35.0448613964598	4.75815487781462	FALSE	1	0.999995	TRUE	no	no	yes	TRUE
ENST00000461613.1	RABGAP1L	D0	D2	protein_coding	retained_intron	91.7040982861562	223.943451000635	35.0448613964598	19.148827785243	NA	0	0.103321	FALSE	NA	NA	NA	TRUE
ENST00000465412.5	RABGAP1L	D0	D2	protein_coding	protein_coding	91.7040982861562	223.943451000635	35.0448613964598	23.8838979603977	NA	0	0.232283	FALSE	NA	NA	NA	TRUE
ENST00000478442.5	RABGAP1L	D0	D2	protein_coding	protein_coding	91.7040982861562	223.943451000635	35.0448613964598	8.91421929892764	NA	0	0.197134	FALSE	NA	NA	NA	TRUE
ENST00000529474.2	RABGAP1L	D0	D2	protein_coding	processed_transcript	91.7040982861562	223.943451000635	35.0448613964598	4.77675415520189	NA	0	0.169809	FALSE	NA	NA	NA	TRUE
ENST00000635248.1	RABGAP1L	D0	D2	protein_coding	nonsense_mediated_decay	91.7040982861562	223.943451000635	35.0448613964598	2.25304654625638	TRUE	0	0.999894	TRUE	no	no	yes	TRUE
ENST00000681986.1	RABGAP1L	D0	D2	protein_coding	protein_coding	91.7040982861562	223.943451000635	35.0448613964598	4.9862421960393	FALSE	1	1	TRUE	yes	no	yes	TRUE
ENST00000655468.1	RAB30-DT	D0	D2	lncRNA	lncRNA	30.2569410923838	22.403190855053	24.6490245727983	1.28926947952598	NA	1	0.00953334	FALSE	NA	NA	NA	TRUE
ENST00000663168.1	RAB30-DT	D0	D2	lncRNA	lncRNA	30.2569410923838	22.403190855053	24.6490245727983	4.70593901585243	NA	2	0.0289675	FALSE	NA	NA	NA	TRUE
ENST00000669005.1	RAB30-DT	D0	D2	lncRNA	lncRNA	30.2569410923838	22.403190855053	24.6490245727983	3.42571902414566	NA	0	0.0301245	FALSE	NA	NA	NA	TRUE
ENST00000507439.5	QDPR	D0	D2	protein_coding	nonsense_mediated_decay	8.34310369177458	10.0486064879486	12.3312643185747	1.30507248843913	TRUE	0	0.802842	TRUE	no	no	no	TRUE
ENST00000543331.1	PXN	D0	D2	protein_coding	protein_coding	19.1740019031221	29.9684278741983	13.8069495979704	0.535459903277131	NA	0	0.156791	FALSE	NA	NA	NA	TRUE
ENST00000547772.1	PXN	D0	D2	protein_coding	processed_transcript	19.1740019031221	29.9684278741983	13.8069495979704	1.92075529273966	NA	0	0.0242503	FALSE	NA	NA	NA	TRUE
ENST00000658429.1	PVT1	D0	D2	lncRNA	lncRNA	16.7617726391101	24.4131622337675	16.5674432541168	1.11310520701054	NA	0	NA	NA	NA	NA	NA	NA
ENST00000662766.1	PVT1	D0	D2	lncRNA	lncRNA	16.7617726391101	24.4131622337675	16.5674432541168	0.786797071030683	NA	0	NA	NA	NA	NA	NA	NA
ENST00000349157.10	PUF60	D0	D2	protein_coding	protein_coding	31.0715342559356	48.5852062856964	28.888195433302	14.9170082427075	FALSE	0	1	TRUE	yes	no	yes	TRUE
ENST00000526683.6	PUF60	D0	D2	protein_coding	protein_coding	31.0715342559356	48.5852062856964	28.888195433302	7.84137612964882	FALSE	0	1	TRUE	yes	no	yes	TRUE
ENST00000288976.3	PTPDC1	D0	D2	protein_coding	protein_coding	9.13087843479558	5.73247382729801	17.3890567368392	1.44701929732829	FALSE	0	1	TRUE	yes	no	yes	FALSE
ENST00000375360.7	PTPDC1	D0	D2	protein_coding	protein_coding	9.13087843479558	5.73247382729801	17.3890567368392	3.65681670040875	FALSE	0	1	TRUE	yes	no	yes	FALSE
ENST00000393370.7	PTPA	D0	D2	protein_coding	protein_coding	26.0247253559905	36.7649130222978	17.1706830644032	9.61728962069092	FALSE	0	0.999999	TRUE	yes	no	no	NA
ENST00000360221.8	PTGES3L-AARSD1	D0	D2	protein_coding	protein_coding	6.54198710678376	1.11587641958821	3.80412943899136	1.2910193828268	FALSE	0	1	TRUE	yes	no	no	TRUE
ENST00000389286.9	PRTG	D0	D2	protein_coding	protein_coding	113.323822850496	3.80614135332701	130.493578611631	98.0522166855216	FALSE	0	1	TRUE	yes	yes	yes	NA
ENST00000561292.1	PRTG	D0	D2	protein_coding	protein_coding	113.323822850496	3.80614135332701	130.493578611631	0.735712209455549	FALSE	0	0.5	TRUE	yes	yes	no	NA
ENST00000603544.5	PRORP	D0	D2	protein_coding	protein_coding	22.8728121802769	39.8165621648028	18.4830588988913	5.80887142491827	FALSE	0	1	TRUE	yes	no	no	TRUE
ENST00000452247.7	PRKG1-AS1	D0	D2	lncRNA	lncRNA	20.516893334748	6.439700844383	31.2669046888368	0.935128639079562	NA	0	NA	NA	NA	NA	NA	FALSE
ENST00000658196.1	PRKG1-AS1	D0	D2	lncRNA	lncRNA	20.516893334748	6.439700844383	31.2669046888368	18.106990806892	NA	0	NA	NA	NA	NA	NA	FALSE
ENST00000445427.1	PRKCQ-AS1	D0	D2	lncRNA	lncRNA	12.5575664382529	20.7217276332172	15.8870591645351	1.04853937525201	NA	1	0.0245684	FALSE	NA	NA	NA	NA
ENST00000345127.9	PRICKLE1	D0	D2	protein_coding	protein_coding	35.0828210157643	17.6096936356023	23.4303925030836	3.2219714593871	FALSE	0	1	TRUE	yes	no	yes	FALSE
ENST00000455697.6	PRICKLE1	D0	D2	protein_coding	protein_coding	35.0828210157643	17.6096936356023	23.4303925030836	0.584296386198436	FALSE	0	1	TRUE	yes	no	yes	FALSE
ENST00000409957.5	PREPL	D0	D2	protein_coding	protein_coding	28.4887557568881	35.6068722757611	23.9069800754593	6.40829555800641	FALSE	1	1	TRUE	yes	no	no	TRUE
ENST00000361568.6	PPT2	D0	D2	protein_coding	protein_coding	7.31565268324501	4.85999088352984	6.05171064951024	0.764207320782584	FALSE	0	NA	NA	no	no	no	TRUE
ENST00000292539.8	PPP1R16A	D0	D2	protein_coding	protein_coding	9.76673825946596	4.01120718406087	17.8900650907071	1.63010921817433	FALSE	0	1	TRUE	yes	no	yes	TRUE
ENST00000528430.2	PPP1R16A	D0	D2	protein_coding	retained_intron	9.76673825946596	4.01120718406087	17.8900650907071	3.63833641556171	NA	0	0.0771405	FALSE	NA	NA	NA	TRUE
ENST00000533088.1	PPP1R16A	D0	D2	protein_coding	processed_transcript	9.76673825946596	4.01120718406087	17.8900650907071	1.27667835182661	NA	0	0.0182997	FALSE	NA	NA	NA	TRUE
ENST00000372556.3	PPCS	D0	D2	protein_coding	protein_coding	41.7166416762174	44.2192738718369	38.8850616020208	26.6487160864057	FALSE	0	0.951242	TRUE	no	no	no	TRUE
ENST00000482168.1	PPCS	D0	D2	protein_coding	processed_transcript	41.7166416762174	44.2192738718369	38.8850616020208	8.36448324743127	NA	0	0.648281	TRUE	NA	NA	NA	TRUE
ENST00000264220.6	PPAT	D0	D2	protein_coding	protein_coding	51.9796733792647	87.6932753726564	62.3253345139043	45.42887296837	FALSE	0	NA	NA	no	no	no	TRUE
ENST00000263331.10	POLR1B	D0	D2	protein_coding	protein_coding	22.1502193689267	40.2048096085952	27.4494026177553	2.21527266642942	FALSE	0	1	TRUE	yes	no	no	NA
ENST00000438748.5	POLR1B	D0	D2	protein_coding	protein_coding	22.1502193689267	40.2048096085952	27.4494026177553	1.70332814490387	NA	0	0.123779	FALSE	NA	NA	NA	NA
ENST00000539111.7	POLG2	D0	D2	protein_coding	protein_coding	20.6459116529053	25.4084737079407	25.768043049044	7.59747965509653	FALSE	0	1	TRUE	yes	no	yes	TRUE
ENST00000580893.5	POLG2	D0	D2	protein_coding	processed_transcript	20.6459116529053	25.4084737079407	25.768043049044	3.59873913491396	NA	0	0.0729354	FALSE	NA	NA	NA	TRUE
ENST00000582501.5	POLG2	D0	D2	protein_coding	processed_transcript	20.6459116529053	25.4084737079407	25.768043049044	1.87561248106266	NA	0	0.0707424	FALSE	NA	NA	NA	TRUE
ENST00000532363.2	POLG	D0	D2	protein_coding	retained_intron	14.0348979813754	21.1165116242393	11.6806133681169	1.86383596122644	NA	1	0.612412	TRUE	NA	NA	NA	TRUE
ENST00000637264.1	POLG	D0	D2	protein_coding	protein_coding	14.0348979813754	21.1165116242393	11.6806133681169	1.32957514518609	NA	0	1	TRUE	NA	NA	NA	TRUE
ENST00000672923.2	POLG	D0	D2	protein_coding	retained_intron	14.0348979813754	21.1165116242393	11.6806133681169	1.2219847512219	NA	1	0.999981	TRUE	NA	NA	NA	TRUE
ENST00000348657.6	POLDIP3	D0	D2	protein_coding	protein_coding	24.3978449433305	36.8877188498155	24.8035662600473	4.66413901565619	FALSE	0	0.999988	TRUE	yes	no	yes	TRUE
ENST00000601668.5	PNPLA6	D0	D2	protein_coding	protein_coding	12.606108938734	20.7200972546443	10.6938801523523	1.14664881058552	NA	0	0.239948	FALSE	NA	NA	NA	TRUE
ENST00000438806.5	PNISR	D0	D2	protein_coding	protein_coding	283.154678388111	273.599721513152	235.835384351888	114.068647625078	FALSE	1	NA	NA	no	no	no	NA
ENST00000476159.1	PNISR	D0	D2	protein_coding	processed_transcript	283.154678388111	273.599721513152	235.835384351888	38.3600861393382	NA	0	NA	NA	NA	NA	NA	NA
ENST00000566068.1	PML	D0	D2	protein_coding	protein_coding	3.60192542236045	5.62318163381662	4.02805034756845	0.287057136137835	NA	0	0.930733	TRUE	NA	NA	NA	TRUE
ENST00000469266.1	PLSCR1	D0	D2	protein_coding	retained_intron	31.7847192763057	42.3698765848401	46.966568466896	3.33896683313081	NA	0	0.589832	TRUE	NA	NA	NA	NA
ENST00000487389.5	PLSCR1	D0	D2	protein_coding	protein_coding	31.7847192763057	42.3698765848401	46.966568466896	3.15438143301423	FALSE	0	1	TRUE	yes	no	yes	NA
ENST00000434483.5	PLP1	D0	D2	protein_coding	protein_coding	23.5244683216078	50.8759609827165	34.2300825362651	1.68844456138322	NA	0	0.0673896	FALSE	NA	NA	NA	TRUE
ENST00000619236.1	PLP1	D0	D2	protein_coding	protein_coding	23.5244683216078	50.8759609827165	34.2300825362651	19.0997644820877	FALSE	0	0.997099	TRUE	yes	no	no	TRUE
ENST00000636090.1	PLEKHA7	D0	D2	protein_coding	protein_coding	24.9806624024825	7.72099801608143	3.94405480246372	1.41065460780083	NA	0	0.999991	TRUE	NA	NA	NA	FALSE
ENST00000564627.2	PLEKHA6	D0	D2	protein_coding	protein_coding	8.68791822375511	4.95956301478189	1.80983851768988	0.48012727208895	NA	0	0.0967482	FALSE	NA	NA	NA	TRUE
ENST00000672625.1	PLEKHA6	D0	D2	protein_coding	protein_coding	8.68791822375511	4.95956301478189	1.80983851768988	0.46449429378218	NA	0	0.43015	FALSE	NA	NA	NA	TRUE
ENST00000409735.9	PLD3	D0	D2	protein_coding	protein_coding	29.766975254768	31.8662910715223	18.3088425414373	9.61454978571845	FALSE	0	NA	NA	no	no	no	FALSE
ENST00000488311.1	PLD3	D0	D2	protein_coding	retained_intron	29.766975254768	31.8662910715223	18.3088425414373	1.17284078075651	NA	0	NA	NA	NA	NA	NA	FALSE
ENST00000264380.9	PIKFYVE	D0	D2	protein_coding	protein_coding	35.3630489549214	36.0061933311139	41.5673454022823	15.0110682058663	FALSE	0	1	TRUE	yes	no	yes	TRUE
ENST00000360525.9	PIGP	D0	D2	protein_coding	protein_coding	16.4899316784956	9.08293288774841	17.0149034759593	10.5145745298152	FALSE	0	0.927462	TRUE	yes	no	no	TRUE
ENST00000399098.5	PIGP	D0	D2	protein_coding	protein_coding	16.4899316784956	9.08293288774841	17.0149034759593	3.34275143842943	FALSE	0	0.55806	TRUE	yes	no	no	TRUE
ENST00000344529.5	PIGC	D0	D2	protein_coding	protein_coding	15.8605019626444	16.8808886268086	16.2110716572102	10.3264291699646	FALSE	0	0.99997	TRUE	yes	no	no	TRUE
ENST00000465374.1	PIGC	D0	D2	protein_coding	processed_transcript	15.8605019626444	16.8808886268086	16.2110716572102	0.614344807653415	NA	0	0.0497995	FALSE	NA	NA	NA	TRUE
ENST00000484368.1	PIGC	D0	D2	protein_coding	processed_transcript	15.8605019626444	16.8808886268086	16.2110716572102	2.21456113193867	NA	0	0.0141266	FALSE	NA	NA	NA	TRUE
ENST00000560504.1	PIF1	D0	D2	protein_coding	retained_intron	18.972311781969	45.0870354031924	10.9881144268936	3.61801765048263	NA	0	0.971427	TRUE	NA	NA	NA	TRUE
ENST00000579899.1	PIEZO2	D0	D2	protein_coding	processed_transcript	9.98047672930673	19.6581627850883	13.1072985027121	1.66960570730581	NA	0	0.0473516	FALSE	NA	NA	NA	TRUE
ENST00000691469.1	PIEZO2	D0	D2	protein_coding	retained_intron	9.98047672930673	19.6581627850883	13.1072985027121	2.29782490329242	NA	0	0.942778	TRUE	NA	NA	NA	TRUE
ENST00000366780.8	PHF10	D0	D2	protein_coding	protein_coding	28.5513074235405	20.0751711049032	36.8751587059983	6.38148233885087	FALSE	0	1	TRUE	yes	no	yes	TRUE
ENST00000612128.1	PHF10	D0	D2	protein_coding	protein_coding	28.5513074235405	20.0751711049032	36.8751587059983	18.8789847917844	FALSE	0	1	TRUE	no	no	yes	TRUE
ENST00000274311.3	PELO	D0	D2	protein_coding	protein_coding	6.67712597589971	10.9938452932115	5.69185693937749	5.27716472500171	FALSE	0	1	TRUE	yes	no	no	TRUE
ENST00000506949.1	PELO	D0	D2	protein_coding	processed_transcript	6.67712597589971	10.9938452932115	5.69185693937749	1.399961250898	NA	0	0.0450327	FALSE	NA	NA	NA	TRUE
ENST00000355841.7	PDLIM7	D0	D2	protein_coding	protein_coding	27.9399061558668	25.5427660956281	13.6105523159052	5.30235991397557	FALSE	0	NA	NA	no	no	no	TRUE
ENST00000291539.11	PDE9A	D0	D2	protein_coding	protein_coding	20.4554317293237	28.4685147193766	29.4567074337608	4.74547751080145	FALSE	0	1	TRUE	yes	no	yes	TRUE
ENST00000335512.8	PDE9A	D0	D2	protein_coding	protein_coding	20.4554317293237	28.4685147193766	29.4567074337608	5.4585325959749	FALSE	0	1	TRUE	yes	no	no	TRUE
ENST00000398232.7	PDE9A	D0	D2	protein_coding	protein_coding	20.4554317293237	28.4685147193766	29.4567074337608	1.61745024977409	FALSE	0	1	TRUE	yes	no	yes	TRUE
ENST00000405755.6	PDE4D	D0	D2	protein_coding	protein_coding	22.1986535653223	2.79228043929479	7.68571175979621	6.06651998477654	FALSE	0	1	TRUE	yes	no	yes	TRUE
ENST00000483454.1	PCOLCE2	D0	D2	protein_coding	retained_intron	12.9586131546878	12.4327793488764	23.3656373863888	1.22302140316272	NA	0	NA	NA	NA	NA	NA	NA
ENST00000495732.5	PCOLCE2	D0	D2	protein_coding	processed_transcript	12.9586131546878	12.4327793488764	23.3656373863888	0.963209458744646	NA	0	NA	NA	NA	NA	NA	NA
ENST00000336126.6	PCGF5	D0	D2	protein_coding	protein_coding	11.6844632451345	6.86463786888118	4.76067583873365	1.05386662544568	FALSE	0	0.992483	TRUE	yes	no	yes	FALSE
ENST00000398640.7	PCDHA11	D0	D2	protein_coding	protein_coding	3.37937054190319	4.7301253488457	4.23081594349985	1.53936631042554	FALSE	1	1	TRUE	yes	yes	yes	TRUE
ENST00000616325.1	PCDHA11	D0	D2	protein_coding	protein_coding	3.37937054190319	4.7301253488457	4.23081594349985	1.73722591179055	FALSE	0	1	TRUE	yes	yes	no	TRUE
ENST00000298274.12	PCDH11X	D0	D2	protein_coding	processed_transcript	10.2630386739044	18.14333330628	24.5205732044087	4.220891444192	NA	0	1	TRUE	NA	NA	NA	TRUE
ENST00000682573.1	PCDH11X	D0	D2	protein_coding	protein_coding	10.2630386739044	18.14333330628	24.5205732044087	2.50510594975526	FALSE	0	1	TRUE	yes	yes	yes	TRUE
ENST00000373482.6	PBX3	D0	D2	protein_coding	nonsense_mediated_decay	95.997183239241	57.1598116586013	58.0860265750786	1.61977645761384	TRUE	0	0.990712	TRUE	yes	no	yes	NA
ENST00000343004.10	PABIR2	D0	D2	protein_coding	protein_coding	12.6812855959161	18.9504133177757	21.8140527401477	1.61050606023011	FALSE	2	0.995116	TRUE	no	no	yes	TRUE
ENST00000394890.7	P4HA1	D0	D2	protein_coding	protein_coding	124.920696912296	96.1738452692583	139.42737940174	27.9570483697294	FALSE	0	1	TRUE	yes	yes	no	NA
ENST00000285083.10	OXNAD1	D0	D2	protein_coding	protein_coding	19.3095276695366	22.4235482787238	18.9510895017657	4.20450914301156	FALSE	0	0.999289	TRUE	yes	no	no	FALSE
ENST00000660003.1	OSER1-DT	D0	D2	lncRNA	lncRNA	4.17431277269056	4.8164849900213	2.53173621241447	0.293435698939338	NA	0	0.0611365	FALSE	NA	NA	NA	FALSE
ENST00000392857.10	ORC4	D0	D2	protein_coding	protein_coding	81.6886591070764	132.938156911592	76.9709359987209	17.3046905570863	FALSE	0	1	TRUE	yes	no	no	TRUE
ENST00000257789.4	ORC3	D0	D2	protein_coding	protein_coding	41.3846838116696	79.8392192425968	44.9231477378068	11.1868881410165	FALSE	0	1	TRUE	yes	no	no	NA
ENST00000392844.8	ORC3	D0	D2	protein_coding	protein_coding	41.3846838116696	79.8392192425968	44.9231477378068	16.847474988984	FALSE	0	1	TRUE	yes	no	no	NA
ENST00000524381.6	OPCML	D0	D2	protein_coding	protein_coding	1.13866036353002	1.04521601126874	1.21331517332844	0.263989289087836	FALSE	0	0.999989	TRUE	yes	yes	no	TRUE
ENST00000601369.6	NUTM2B-AS1	D0	D2	lncRNA	lncRNA	22.5006010738295	15.6063331157562	28.5051780372703	3.58820826806359	NA	0	0.0214868	FALSE	NA	NA	NA	NA
ENST00000659471.1	NUTM2B-AS1	D0	D2	lncRNA	lncRNA	22.5006010738295	15.6063331157562	28.5051780372703	2.31739954588073	NA	0	0.0437062	FALSE	NA	NA	NA	NA
ENST00000549838.5	NUBPL	D0	D2	protein_coding	nonsense_mediated_decay	18.975739531139	15.9709402904864	20.2674402148426	0.608589750056272	NA	0	0.29955	FALSE	NA	NA	NA	NA
ENST00000223190.8	NRF1	D0	D2	protein_coding	protein_coding	6.92941030836753	6.37107744535896	7.43652566733028	3.01019686476179	FALSE	0	1	TRUE	yes	no	yes	TRUE
ENST00000606165.5	NR2F1-AS1	D0	D2	lncRNA	lncRNA	5.20140951394175	4.06084466994219	6.33497193361082	0.75704991450333	NA	0	0.0181627	FALSE	NA	NA	NA	TRUE
ENST00000670693.1	NR2F1-AS1	D0	D2	lncRNA	lncRNA	5.20140951394175	4.06084466994219	6.33497193361082	2.31238286439065	NA	0	0.783337	TRUE	NA	NA	NA	TRUE
ENST00000547415.1	NOVA1	D0	D2	protein_coding	retained_intron	7.91339721044768	5.55368346151428	10.2134225218775	2.0868910141244	NA	0	0.0055545	FALSE	NA	NA	NA	NA
ENST00000652986.1	NNT	D0	D2	protein_coding	nonsense_mediated_decay	51.2315662660509	25.1947430473436	15.6574939638722	2.71642825515646	TRUE	0	1	TRUE	yes	no	no	NA
ENST00000378150.1	NMT2	D0	D2	protein_coding	protein_coding	16.025744292089	16.1891403757433	14.6700998441869	8.07949855416865	FALSE	0	1	TRUE	yes	no	yes	TRUE
ENST00000466201.1	NMT2	D0	D2	protein_coding	processed_transcript	16.025744292089	16.1891403757433	14.6700998441869	3.07714493234145	NA	0	0.119019	FALSE	NA	NA	NA	TRUE
ENST00000336097.7	NME1	D0	D2	protein_coding	protein_coding	79.3305119174309	177.241871168885	66.860849613904	13.0184449767735	FALSE	0	0.994866	TRUE	yes	no	no	TRUE
ENST00000393196.8	NME1	D0	D2	protein_coding	protein_coding	79.3305119174309	177.241871168885	66.860849613904	62.2846631359284	FALSE	0	0.926742	TRUE	yes	no	no	TRUE
ENST00000381095.8	NLGN4X	D0	D2	protein_coding	protein_coding	19.6862786559113	66.9667262953062	40.9879756504358	12.9661478788753	FALSE	0	1	TRUE	yes	no	yes	FALSE
ENST00000566396.1	NKD1	D0	D2	protein_coding	retained_intron	18.6925650980351	1.39061411727119	53.1119503050221	3.87932657632589	NA	0	0.138669	FALSE	NA	NA	NA	TRUE
ENST00000342260.9	NHSL1	D0	D2	protein_coding	protein_coding	14.7054860395465	11.6054696217344	16.4856032658856	2.92837188337872	NA	0	0.354455	FALSE	NA	NA	NA	FALSE
ENST00000369301.3	NHLRC2	D0	D2	protein_coding	protein_coding	14.7148614238646	12.1046995599775	15.5060192783387	12.9305609483738	FALSE	0	NA	NA	no	no	no	TRUE
ENST00000468890.1	NHLRC2	D0	D2	protein_coding	retained_intron	14.7148614238646	12.1046995599775	15.5060192783387	1.78430047549083	NA	0	NA	NA	NA	NA	NA	TRUE
ENST00000397789.3	NF2	D0	D2	protein_coding	protein_coding	32.0765117132947	56.8199300855646	26.2711575527141	13.0135986307137	FALSE	0	1	TRUE	yes	no	yes	TRUE
ENST00000470735.1	NEXN	D0	D2	protein_coding	retained_intron	58.5038775472479	9.08562629424149	5.75682179096831	3.47383430394264	NA	0	0.0986731	FALSE	NA	NA	NA	TRUE
ENST00000417816.2	NEBL	D0	D2	protein_coding	protein_coding	325.70512327411	5.91938115045734	14.3186364863033	0.48065031408069	FALSE	0	0.99793	TRUE	yes	no	no	TRUE
ENST00000675747.1	NEBL	D0	D2	protein_coding	retained_intron	325.70512327411	5.91938115045734	14.3186364863033	7.70474068157469	NA	0	1	TRUE	NA	NA	NA	TRUE
ENST00000218652.12	NDFIP2	D0	D2	protein_coding	protein_coding	14.6431074204063	14.539144925782	14.2827304910984	3.27876397513464	FALSE	0	0.999988	TRUE	no	no	yes	TRUE
ENST00000318220.10	NBPF3	D0	D2	protein_coding	nonsense_mediated_decay	12.3333070671758	15.0347301528594	11.597393397827	3.23998579829897	TRUE	0	1	TRUE	no	no	yes	TRUE
ENST00000318249.10	NBPF3	D0	D2	protein_coding	protein_coding	12.3333070671758	15.0347301528594	11.597393397827	1.14734422420244	FALSE	0	1	TRUE	yes	no	yes	TRUE
ENST00000454000.6	NBPF3	D0	D2	protein_coding	protein_coding	12.3333070671758	15.0347301528594	11.597393397827	0.825637155076052	FALSE	0	1	TRUE	yes	no	yes	TRUE
ENST00000430580.6	NBPF1	D0	D2	protein_coding	protein_coding	32.7934278908979	18.4471114524823	39.2812246701472	7.13888504688318	FALSE	0	NA	NA	no	no	no	TRUE
ENST00000599908.1	NBPF1	D0	D2	protein_coding	processed_transcript	32.7934278908979	18.4471114524823	39.2812246701472	6.42201122305832	NA	0	NA	NA	NA	NA	NA	TRUE
ENST00000486870.1	NBEAL2	D0	D2	protein_coding	retained_intron	5.81584592384326	10.2862810250608	3.83278601054302	0.610814285595842	NA	0	0.232811	FALSE	NA	NA	NA	TRUE
ENST00000682630.1	NBEAL1	D0	D2	protein_coding	retained_intron	15.0943925014088	10.1516253559983	12.3831891325614	3.35308365598229	NA	0	0.0509189	FALSE	NA	NA	NA	FALSE
ENST00000683001.1	NBEAL1	D0	D2	protein_coding	nonsense_mediated_decay	15.0943925014088	10.1516253559983	12.3831891325614	0.658691062349638	TRUE	0	1	TRUE	yes	no	no	FALSE
ENST00000397909.7	NAV3	D0	D2	protein_coding	protein_coding	10.6892001852057	4.3747474667276	10.2353621406964	0.401560373202396	FALSE	0	1	TRUE	yes	no	yes	TRUE
ENST00000550042.2	NAV3	D0	D2	protein_coding	protein_coding	10.6892001852057	4.3747474667276	10.2353621406964	0.79060828075199	FALSE	0	0.650704	TRUE	yes	no	yes	TRUE
ENST00000534229.1	NAV2	D0	D2	protein_coding	processed_transcript	17.7199469382796	17.8144555225562	9.74729641976598	2.06344224313046	NA	0	0.205261	FALSE	NA	NA	NA	TRUE
ENST00000534299.5	NAV2	D0	D2	protein_coding	processed_transcript	17.7199469382796	17.8144555225562	9.74729641976598	0.930688622220345	NA	0	0.164115	FALSE	NA	NA	NA	TRUE
ENST00000464190.6	NASP	D0	D2	protein_coding	retained_intron	793.383120266327	1612.08087559661	702.344322472093	73.1570704294161	NA	0	0.986399	TRUE	NA	NA	NA	NA
ENST00000427257.5	NAPEPLD	D0	D2	protein_coding	protein_coding	4.73226140993151	3.43751384582628	5.81204168559498	0.529160185331035	FALSE	2	1	TRUE	yes	no	yes	TRUE
ENST00000465647.6	NAPEPLD	D0	D2	protein_coding	protein_coding	4.73226140993151	3.43751384582628	5.81204168559498	0.699757793852534	FALSE	5	1	TRUE	yes	no	yes	TRUE
ENST00000479761.1	NAPEPLD	D0	D2	protein_coding	retained_intron	4.73226140993151	3.43751384582628	5.81204168559498	0.938179379280408	NA	0	0.128648	FALSE	NA	NA	NA	TRUE
ENST00000541267.5	NANOG	D0	D2	protein_coding	protein_coding	66.7032316670412	154.115555719786	40.3899337832397	9.33162176562061	NA	0	0.244008	FALSE	NA	NA	NA	TRUE
ENST00000261839.12	MYO5C	D0	D2	protein_coding	protein_coding	10.5669166353578	15.347402276705	12.6867800231489	7.14262453535662	FALSE	0	1	TRUE	yes	no	yes	NA
ENST00000560809.5	MYO5C	D0	D2	protein_coding	nonsense_mediated_decay	10.5669166353578	15.347402276705	12.6867800231489	0.569594886747391	TRUE	0	1	TRUE	yes	no	no	NA
ENST00000594977.6	MYO1F	D0	D2	protein_coding	retained_intron	2.89592550368181	2.16248345906838	9.19327029241678	0.652547941394341	NA	0	0.999999	TRUE	NA	NA	NA	TRUE
ENST00000530254.6	MYO18A	D0	D2	protein_coding	nonsense_mediated_decay	110.423299186074	64.8638896958698	72.7669201421492	9.10324778744855	NA	0	1	TRUE	NA	NA	NA	NA
ENST00000505695.5	MYO10	D0	D2	protein_coding	protein_coding	45.2756974499413	60.5070437830666	70.4262326515591	6.3545134403736	FALSE	0	1	TRUE	yes	no	yes	TRUE
ENST00000513882.5	MYO10	D0	D2	protein_coding	protein_coding	45.2756974499413	60.5070437830666	70.4262326515591	8.85921188695629	FALSE	0	0.998888	TRUE	yes	no	no	TRUE
ENST00000535889.6	MTR	D0	D2	protein_coding	protein_coding	36.3807060395108	27.3501968635133	29.7839617941094	1.36259553462319	FALSE	0	NA	NA	no	no	no	NA
ENST00000380692.7	MSL3	D0	D2	protein_coding	protein_coding	22.0918290020569	23.9203637382354	22.708363609672	1.49286854936274	NA	1	0.0486604	FALSE	NA	NA	NA	TRUE
ENST00000339569.9	MSL1	D0	D2	protein_coding	retained_intron	67.7696644192829	59.9145807150254	54.0408542954772	15.9093362155446	NA	1	NA	NA	NA	NA	NA	TRUE
ENST00000577454.5	MSL1	D0	D2	protein_coding	protein_coding	67.7696644192829	59.9145807150254	54.0408542954772	14.3641541614324	FALSE	1	NA	NA	no	no	no	TRUE
ENST00000579565.5	MSL1	D0	D2	protein_coding	protein_coding	67.7696644192829	59.9145807150254	54.0408542954772	22.868455421269	FALSE	0	NA	NA	no	no	no	TRUE
ENST00000295491.9	MRPS18C	D0	D2	protein_coding	protein_coding	36.3734124556062	52.4473188588593	40.2928581824909	17.4705751265644	FALSE	0	0.558507	TRUE	yes	no	no	TRUE
ENST00000505525.1	MRPS18C	D0	D2	protein_coding	retained_intron	36.3734124556062	52.4473188588593	40.2928581824909	2.31954068489147	NA	1	0.0153227	FALSE	NA	NA	NA	TRUE
ENST00000507019.5	MRPS18C	D0	D2	protein_coding	protein_coding	36.3734124556062	52.4473188588593	40.2928581824909	10.967560972149	FALSE	0	0.520871	TRUE	yes	no	no	TRUE
ENST00000537007.5	MRPL48	D0	D2	protein_coding	protein_coding	26.2201684144971	50.1951066338908	20.940608249906	4.85137596011769	NA	0	0.0118257	FALSE	NA	NA	NA	TRUE
ENST00000403379.3	MPZL1	D0	D2	protein_coding	processed_transcript	67.3276242599159	75.3197806005935	75.1035357141929	8.51618386098518	NA	0	0.119117	FALSE	NA	NA	NA	NA
ENST00000262244.6	MOB3B	D0	D2	protein_coding	protein_coding	5.15793362335698	11.4120738684217	3.29531420484982	4.15156396187879	FALSE	0	0.957706	TRUE	yes	no	no	TRUE
ENST00000603061.1	MOB3B	D0	D2	protein_coding	processed_transcript	5.15793362335698	11.4120738684217	3.29531420484982	1.00636966147819	NA	0	0.0198433	FALSE	NA	NA	NA	TRUE
ENST00000409107.1	MITD1	D0	D2	protein_coding	protein_coding	92.7169376816714	111.338268716694	126.082181922046	32.3190560160812	NA	0	0.20301	FALSE	NA	NA	NA	TRUE
ENST00000487588.5	MITD1	D0	D2	protein_coding	processed_transcript	92.7169376816714	111.338268716694	126.082181922046	21.7029250905308	NA	0	0.682878	TRUE	NA	NA	NA	TRUE
ENST00000464203.1	MIR9-1HG	D0	D2	lncRNA	lncRNA	4.21183561319389	4.61717035044705	2.25959959895466	0.0601528386992358	NA	0	NA	NA	NA	NA	NA	NA
ENST00000509938.2	MIR302CHG	D0	D2	lncRNA	lncRNA	263.633338559484	780.361018472187	86.6087902176086	115.224111950595	NA	0	0.00894705	FALSE	NA	NA	NA	FALSE
ENST00000317552.9	MID1	D0	D2	protein_coding	protein_coding	32.8956622191202	33.8968103450087	19.6098477719041	6.89833685729019	FALSE	0	1	TRUE	yes	no	no	FALSE
ENST00000380787.5	MID1	D0	D2	protein_coding	protein_coding	32.8956622191202	33.8968103450087	19.6098477719041	5.37938232360983	FALSE	0	1	TRUE	yes	no	no	FALSE
ENST00000453318.6	MID1	D0	D2	protein_coding	protein_coding	32.8956622191202	33.8968103450087	19.6098477719041	2.43671015307044	FALSE	0	1	TRUE	yes	no	no	FALSE
ENST00000674917.1	MID1	D0	D2	protein_coding	protein_coding	32.8956622191202	33.8968103450087	19.6098477719041	0.675505095875855	FALSE	0	0.821932	TRUE	yes	no	no	FALSE
ENST00000687008.1	MID1	D0	D2	protein_coding	protein_coding	32.8956622191202	33.8968103450087	19.6098477719041	4.43702787990761	FALSE	0	1	TRUE	yes	no	no	FALSE
ENST00000409391.1	MGAT4A	D0	D2	protein_coding	protein_coding	2.91121600759448	4.01005410000956	1.29157358711473	0.619706567066042	FALSE	0	1	TRUE	yes	no	no	TRUE
ENST00000492163.5	MGAT4A	D0	D2	protein_coding	processed_transcript	2.91121600759448	4.01005410000956	1.29157358711473	0.360102910616155	NA	0	0.120131	FALSE	NA	NA	NA	TRUE
ENST00000358154.8	METTL9	D0	D2	protein_coding	protein_coding	108.833364087589	113.502880399788	109.666396053783	26.060520873619	FALSE	0	0.999987	TRUE	yes	yes	no	TRUE
ENST00000411432.5	METTL21A	D0	D2	protein_coding	protein_coding	28.6732814004301	52.7214922229369	24.6274081964585	6.23520787368985	FALSE	1	0.993751	TRUE	yes	no	no	TRUE
ENST00000442521.1	METTL21A	D0	D2	protein_coding	protein_coding	28.6732814004301	52.7214922229369	24.6274081964585	1.22535291090642	FALSE	0	0.999699	TRUE	yes	no	no	TRUE
ENST00000312865.10	MED25	D0	D2	protein_coding	protein_coding	6.29952590555883	7.29310210052877	5.66902549722569	0.489995563766151	FALSE	0	NA	NA	no	no	no	NA
ENST00000328913.8	MCF2L2	D0	D2	protein_coding	protein_coding	7.81300503409457	5.64946572729617	4.28483988541223	0.995008107756042	FALSE	0	1	TRUE	yes	no	yes	TRUE
ENST00000414362.6	MCF2L2	D0	D2	protein_coding	protein_coding	7.81300503409457	5.64946572729617	4.28483988541223	1.89923418120001	FALSE	0	1	TRUE	yes	no	yes	TRUE
ENST00000461074.1	MCF2L2	D0	D2	protein_coding	retained_intron	7.81300503409457	5.64946572729617	4.28483988541223	0.681747891815491	NA	0	0.578398	TRUE	NA	NA	NA	TRUE
ENST00000394311.6	MBNL3	D0	D2	protein_coding	protein_coding	4.59744402513175	1.6775258718935	9.07329432670205	0.357283498406238	FALSE	0	0.987125	TRUE	yes	no	no	TRUE
ENST00000457839.6	MBD1	D0	D2	protein_coding	protein_coding	18.4878552902662	18.0139402633959	15.3320153852331	1.06175949967184	FALSE	1	1	TRUE	yes	no	yes	NA
ENST00000592060.5	MBD1	D0	D2	protein_coding	protein_coding	18.4878552902662	18.0139402633959	15.3320153852331	1.9080542451861	NA	1	0.99988	TRUE	NA	NA	NA	NA
ENST00000280969.9	MAT2B	D0	D2	protein_coding	protein_coding	52.4286459662463	95.7954913734871	39.1013470441874	20.1551471367982	FALSE	0	1	TRUE	yes	no	no	FALSE
ENST00000325631.10	MARVELD2	D0	D2	protein_coding	protein_coding	9.80584514236326	20.6003723120201	10.416929784768	3.35633274639171	FALSE	0	1	TRUE	yes	no	yes	FALSE
ENST00000454295.6	MARVELD2	D0	D2	protein_coding	protein_coding	9.80584514236326	20.6003723120201	10.416929784768	2.86620954607785	FALSE	0	1	TRUE	yes	no	yes	FALSE
ENST00000590479.6	MAPKAPK5-AS1	D0	D2	lncRNA	lncRNA	39.5935594330533	83.3806570701402	34.8444001009197	3.86649564443448	NA	0	0.0917144	FALSE	NA	NA	NA	TRUE
ENST00000656209.1	MAPKAPK5-AS1	D0	D2	lncRNA	lncRNA	39.5935594330533	83.3806570701402	34.8444001009197	3.81179222948896	NA	2	0.103696	FALSE	NA	NA	NA	TRUE
ENST00000656227.2	MAPKAPK5-AS1	D0	D2	lncRNA	lncRNA	39.5935594330533	83.3806570701402	34.8444001009197	13.3075160333112	NA	1	0.218953	FALSE	NA	NA	NA	TRUE
ENST00000692189.1	MAPKAPK5-AS1	D0	D2	lncRNA	lncRNA	39.5935594330533	83.3806570701402	34.8444001009197	10.0983180500812	NA	1	0.0825441	FALSE	NA	NA	NA	TRUE
ENST00000438100.6	MAP7	D0	D2	protein_coding	protein_coding	29.5863946790632	86.9536893893741	21.1935567045642	5.77613859715859	FALSE	0	1	TRUE	yes	no	yes	TRUE
ENST00000544465.5	MAP7	D0	D2	protein_coding	protein_coding	29.5863946790632	86.9536893893741	21.1935567045642	12.9798976702694	FALSE	0	1	TRUE	yes	no	yes	TRUE
ENST00000347699.8	MAP4K4	D0	D2	protein_coding	protein_coding	109.478449209571	107.33020112032	114.691030401527	7.51517549261153	FALSE	0	1	TRUE	yes	no	yes	NA
ENST00000445520.7	MAP4K3-DT	D0	D2	lncRNA	lncRNA	9.02846842313349	10.6551384113141	5.65514745800019	2.29009697498041	NA	0	0.0337708	FALSE	NA	NA	NA	FALSE
ENST00000449569.6	MAP4K3-DT	D0	D2	lncRNA	lncRNA	9.02846842313349	10.6551384113141	5.65514745800019	0.463645058354205	NA	0	0.0430641	FALSE	NA	NA	NA	FALSE
ENST00000658057.1	MAP4K3-DT	D0	D2	lncRNA	lncRNA	9.02846842313349	10.6551384113141	5.65514745800019	0.503912731967824	NA	0	0.0348917	FALSE	NA	NA	NA	FALSE
ENST00000667600.1	MAP4K3-DT	D0	D2	lncRNA	lncRNA	9.02846842313349	10.6551384113141	5.65514745800019	1.09131897073737	NA	0	0.165883	FALSE	NA	NA	NA	FALSE
ENST00000671403.1	MAP4K3-DT	D0	D2	lncRNA	lncRNA	9.02846842313349	10.6551384113141	5.65514745800019	1.49901448446819	NA	0	0.172227	FALSE	NA	NA	NA	FALSE
ENST00000369332.7	MAP3K7	D0	D2	protein_coding	protein_coding	31.7012967726222	41.4348221945729	32.6253672093147	15.0209384840718	FALSE	0	1	TRUE	yes	no	yes	TRUE
ENST00000479630.1	MAP3K7	D0	D2	protein_coding	processed_transcript	31.7012967726222	41.4348221945729	32.6253672093147	11.4539712268815	NA	0	0.760003	TRUE	NA	NA	NA	TRUE
ENST00000375213.8	MAP3K20	D0	D2	protein_coding	protein_coding	32.5906170038651	22.3519903760067	10.128788979003	1.31905968159807	FALSE	0	1	TRUE	yes	no	yes	NA
ENST00000539448.5	MAP3K20	D0	D2	protein_coding	protein_coding	32.5906170038651	22.3519903760067	10.128788979003	3.08028336716177	FALSE	0	1	TRUE	yes	no	yes	NA
ENST00000475600.5	MAP2	D0	D2	protein_coding	processed_transcript	10.1758463665226	7.1907553805898	8.87040687321139	0.4073678175287	NA	0	0.564802	TRUE	NA	NA	NA	TRUE
ENST00000628781.1	MAGI2	D0	D2	protein_coding	protein_coding	22.071677976618	13.7680333685126	19.4657465109491	6.5360498935107	FALSE	1	1	TRUE	yes	no	yes	NA
ENST00000637249.1	MAGI2	D0	D2	protein_coding	processed_transcript	22.071677976618	13.7680333685126	19.4657465109491	1.39487451700242	NA	0	0.0583778	FALSE	NA	NA	NA	NA
ENST00000676103.1	MAGI2	D0	D2	protein_coding	retained_intron	22.071677976618	13.7680333685126	19.4657465109491	1.74279043036337	NA	0	0.048455	FALSE	NA	NA	NA	NA
ENST00000330909.12	MAGI1	D0	D2	protein_coding	protein_coding	47.6160380573671	79.3219967696427	43.6236116492713	1.85597013532826	FALSE	0	1	TRUE	yes	no	yes	NA
ENST00000479287.1	MAGI1	D0	D2	protein_coding	protein_coding	47.6160380573671	79.3219967696427	43.6236116492713	14.5315821450084	NA	0	0.23242	FALSE	NA	NA	NA	NA
ENST00000492055.5	MACROD2	D0	D2	protein_coding	processed_transcript	7.07209473645598	3.40536286004881	7.93309578090225	1.38976522213918	NA	0	0.0388524	FALSE	NA	NA	NA	FALSE
ENST00000332878.8	MACC1	D0	D2	protein_coding	protein_coding	12.1122351932574	27.3988913166792	18.2359831470305	3.32597520483116	FALSE	0	1	TRUE	no	no	no	FALSE
ENST00000409381.5	LYPD6	D0	D2	protein_coding	protein_coding	6.13418578177656	6.01859869737573	3.18276496025888	1.27637235196977	FALSE	0	0.916294	TRUE	yes	yes	no	FALSE
ENST00000240304.5	LUC7L3	D0	D2	protein_coding	protein_coding	240.472710372381	246.088037065602	202.547955979354	37.5293846400003	FALSE	0	1	TRUE	yes	no	yes	NA
ENST00000397780.5	LUC7L	D0	D2	protein_coding	protein_coding	66.2990873480502	71.4523695851728	60.4152690686458	3.20283524545465	FALSE	0	0.996656	TRUE	yes	no	yes	NA
ENST00000409088.3	LRRTM4	D0	D2	protein_coding	protein_coding	10.748368082473	7.7176303119656	13.0511308809258	2.08202304598026	FALSE	0	0.999999	TRUE	yes	yes	no	TRUE
ENST00000244815.9	LRRFIP1	D0	D2	protein_coding	protein_coding	149.415159753434	202.613559713728	96.0674503496139	8.65407765349633	FALSE	0	1	TRUE	yes	no	yes	NA
ENST00000392000.4	LRRFIP1	D0	D2	protein_coding	protein_coding	149.415159753434	202.613559713728	96.0674503496139	14.3252876950193	FALSE	0	1	TRUE	yes	no	yes	NA
ENST00000306052.12	LRP8	D0	D2	protein_coding	protein_coding	28.3714093575851	51.7199350974564	46.2182556364102	5.19512204331518	FALSE	1	1	TRUE	yes	yes	yes	TRUE
ENST00000424843.6	LRP12	D0	D2	protein_coding	protein_coding	9.9540521117839	6.66379259539178	10.1730917217724	6.3532319895591	FALSE	0	NA	NA	no	no	no	FALSE
ENST00000519675.1	LRP12	D0	D2	protein_coding	retained_intron	9.9540521117839	6.66379259539178	10.1730917217724	0.650697700813618	NA	0	NA	NA	NA	NA	NA	FALSE
ENST00000564084.1	LPCAT2	D0	D2	protein_coding	protein_coding	6.92290895229785	5.09297146578959	4.55290545065416	0.819651448676553	NA	0	0.911046	TRUE	NA	NA	NA	TRUE
ENST00000566911.1	LPCAT2	D0	D2	protein_coding	retained_intron	6.92290895229785	5.09297146578959	4.55290545065416	1.88343746297379	NA	0	0.585948	TRUE	NA	NA	NA	TRUE
ENST00000537304.6	LMO3	D0	D2	protein_coding	protein_coding	8.20151455698434	21.7453013572922	2.00959628419938	1.25226399557941	FALSE	0	NA	NA	no	no	no	TRUE
ENST00000538020.1	LMO3	D0	D2	protein_coding	protein_coding	8.20151455698434	21.7453013572922	2.00959628419938	0.417388405279411	FALSE	0	NA	NA	no	no	no	TRUE
ENST00000541589.5	LMO3	D0	D2	protein_coding	nonsense_mediated_decay	8.20151455698434	21.7453013572922	2.00959628419938	1.38273038029924	TRUE	0	NA	NA	no	no	no	TRUE
ENST00000676385.2	LMNA	D0	D2	protein_coding	protein_coding	30.6061913331086	24.9840303393754	5.59916308370933	0.421418994330256	FALSE	0	1	TRUE	yes	no	yes	NA
ENST00000668238.1	LINC02175	D0	D2	lncRNA	lncRNA	3.10193143131618	2.68316592505943	2.33097546455115	0.568817712084153	NA	0	0.12627	FALSE	NA	NA	NA	FALSE
ENST00000655530.1	LINC01572	D0	D2	lncRNA	lncRNA	14.2152501739237	10.761697918511	17.7402898253218	2.21058580862032	NA	0	0.076411	FALSE	NA	NA	NA	NA
ENST00000598922.1	LINC01224	D0	D2	lncRNA	lncRNA	14.6847673818824	27.4257302391506	16.4325443916948	0.581353009913381	NA	0	0.00926445	FALSE	NA	NA	NA	NA
ENST00000536539.1	LINC00937	D0	D2	lncRNA	lncRNA	20.4501725972596	10.6393597079142	35.9483986764434	2.02743293626427	NA	0	0.00415656	FALSE	NA	NA	NA	FALSE
ENST00000536560.1	LINC00937	D0	D2	lncRNA	lncRNA	20.4501725972596	10.6393597079142	35.9483986764434	11.8690809019211	NA	0	0.0457472	FALSE	NA	NA	NA	FALSE
ENST00000539348.5	LINC00937	D0	D2	lncRNA	lncRNA	20.4501725972596	10.6393597079142	35.9483986764434	0.871273289759744	NA	0	0.0255155	FALSE	NA	NA	NA	FALSE
ENST00000665891.1	LINC00884	D0	D2	lncRNA	lncRNA	7.13593470480721	3.15252509075065	6.23445932502021	0.27826316317297	NA	1	NA	NA	NA	NA	NA	TRUE
ENST00000669924.1	LINC00882	D0	D2	lncRNA	lncRNA	16.8706319222405	14.6415575848528	21.7951539960042	7.33759045733297	NA	0	0.00859911	FALSE	NA	NA	NA	TRUE
ENST00000657539.1	LINC00467	D0	D2	lncRNA	lncRNA	43.2069738558977	12.4739002581575	109.509648493927	1.84947328984145	NA	0	0.262699	FALSE	NA	NA	NA	FALSE
ENST00000429901.2	LINC-PINT	D0	D2	lncRNA	retained_intron	6.10673907345154	4.63200158430298	7.3411776040485	2.0219261532425	NA	0	0.0129158	FALSE	NA	NA	NA	TRUE
ENST00000410093.5	LIMS1	D0	D2	protein_coding	protein_coding	25.8276240956745	25.1894658982754	40.6080913565529	0.98476353832196	FALSE	0	0.99998	TRUE	yes	no	no	TRUE
ENST00000449684.6	LIMS1	D0	D2	protein_coding	processed_transcript	25.8276240956745	25.1894658982754	40.6080913565529	1.94303522998778	NA	0	0.283848	FALSE	NA	NA	NA	TRUE
ENST00000326877.8	LCORL	D0	D2	protein_coding	protein_coding	21.9664082694264	31.1487406776496	17.7977441813978	2.50373324014628	FALSE	0	0.999982	TRUE	no	no	yes	TRUE
ENST00000510451.5	LCORL	D0	D2	protein_coding	nonsense_mediated_decay	21.9664082694264	31.1487406776496	17.7977441813978	3.58363253382401	TRUE	0	0.979652	TRUE	no	no	no	TRUE
ENST00000674942.1	LCORL	D0	D2	protein_coding	protein_coding	21.9664082694264	31.1487406776496	17.7977441813978	2.55002750845247	FALSE	0	0.999986	TRUE	no	no	yes	TRUE
ENST00000676061.1	LCORL	D0	D2	protein_coding	nonsense_mediated_decay	21.9664082694264	31.1487406776496	17.7977441813978	1.44080155869473	TRUE	0	0.999966	TRUE	no	no	no	TRUE
ENST00000509622.5	LARP7	D0	D2	protein_coding	nonsense_mediated_decay	125.940856954598	142.412731231456	131.833642267123	12.5889855428006	TRUE	0	1	TRUE	no	no	no	TRUE
ENST00000256078.10	KRAS	D0	D2	protein_coding	protein_coding	27.8974558772724	50.9066275807203	26.6149097008215	4.53998953957693	FALSE	0	0.974519	TRUE	yes	no	no	FALSE
ENST00000344337.11	KPNA1	D0	D2	protein_coding	protein_coding	33.2329040017892	55.8484299918954	26.8742457195091	6.91714976179254	FALSE	0	1	TRUE	yes	no	yes	NA
ENST00000304363.9	KMT5B	D0	D2	protein_coding	protein_coding	39.7457583296713	47.2818751450832	39.8006664382859	4.42902946661983	FALSE	0	1	TRUE	yes	no	yes	NA
ENST00000401547.6	KMT5B	D0	D2	protein_coding	protein_coding	39.7457583296713	47.2818751450832	39.8006664382859	15.0365936113376	FALSE	1	0.999998	TRUE	yes	no	yes	NA
ENST00000291726.11	KLK8	D0	D2	protein_coding	protein_coding	3.36853436272714	9.0266485997031	2.44715296013491	0.313986261219545	FALSE	0	0.923792	TRUE	yes	no	no	TRUE
ENST00000391946.7	KLC3	D0	D2	protein_coding	protein_coding	2.07409038516499	1.93748277107917	2.44153802442416	0.660023273180092	FALSE	0	1	TRUE	yes	no	yes	TRUE
ENST00000506857.5	KIF2A	D0	D2	protein_coding	protein_coding	55.2259159984054	102.300067227836	62.167311498607	3.46993311044682	FALSE	0	1	TRUE	yes	no	yes	TRUE
ENST00000352331.8	KIF23	D0	D2	protein_coding	protein_coding	62.9242472079722	126.979072871149	50.7313725042965	7.13071379836184	FALSE	0	1	TRUE	yes	no	yes	TRUE
ENST00000647715.1	KIF23	D0	D2	protein_coding	protein_coding	62.9242472079722	126.979072871149	50.7313725042965	22.0502253377726	FALSE	0	1	TRUE	yes	no	yes	TRUE
ENST00000691169.1	KIF22	D0	D2	protein_coding	retained_intron	36.9692841683439	65.0833443003036	33.3221803326948	15.4672385946518	NA	1	1	TRUE	NA	NA	NA	TRUE
ENST00000635504.1	KIAA1217	D0	D2	protein_coding	protein_coding	13.2202073598698	12.47015944055	5.94423838152516	1.66974523405601	NA	0	0.22477	FALSE	NA	NA	NA	TRUE
ENST00000377967.9	KDM6A	D0	D2	protein_coding	protein_coding	40.4956828679648	63.3825054133555	24.6023299711312	0.678045081793287	FALSE	1	1	TRUE	yes	no	yes	NA
ENST00000675546.1	KDM6A	D0	D2	protein_coding	retained_intron	40.4956828679648	63.3825054133555	24.6023299711312	3.87853490883111	NA	4	0.999802	TRUE	NA	NA	NA	NA
ENST00000686215.1	KATNAL2	D0	D2	protein_coding	nonsense_mediated_decay	10.3233566188972	24.5239262361408	6.37012341699966	0.517660685139704	TRUE	0	0.999955	TRUE	yes	no	yes	TRUE
ENST00000688659.1	KATNAL2	D0	D2	protein_coding	processed_transcript	10.3233566188972	24.5239262361408	6.37012341699966	0.857239404122578	NA	1	0.894814	TRUE	NA	NA	NA	TRUE
ENST00000649463.1	KAT6B	D0	D2	protein_coding	protein_coding	14.1330817850153	12.0826438581469	13.246304346785	0.855928369245985	FALSE	0	NA	NA	no	no	no	NA
ENST00000399262.7	JMJD1C	D0	D2	protein_coding	protein_coding	105.754949949428	179.614092748568	80.0983245230771	11.099886894637	FALSE	0	1	TRUE	yes	no	yes	TRUE
ENST00000467356.5	JMJD1C	D0	D2	protein_coding	retained_intron	105.754949949428	179.614092748568	80.0983245230771	3.45166363374301	NA	0	0.0921445	FALSE	NA	NA	NA	TRUE
ENST00000489372.4	JMJD1C	D0	D2	protein_coding	processed_transcript	105.754949949428	179.614092748568	80.0983245230771	11.8399695429276	NA	0	0.0188977	FALSE	NA	NA	NA	TRUE
ENST00000497922.1	JMJD1C	D0	D2	protein_coding	processed_transcript	105.754949949428	179.614092748568	80.0983245230771	6.06896384440348	NA	0	0.244625	FALSE	NA	NA	NA	TRUE
ENST00000542921.5	JMJD1C	D0	D2	protein_coding	protein_coding	105.754949949428	179.614092748568	80.0983245230771	52.247522564143	FALSE	0	1	TRUE	yes	no	yes	TRUE
ENST00000633035.1	JMJD1C	D0	D2	protein_coding	processed_transcript	105.754949949428	179.614092748568	80.0983245230771	9.50964011025283	NA	0	0.0163845	FALSE	NA	NA	NA	TRUE
ENST00000610919.4	JADE1	D0	D2	protein_coding	protein_coding	38.8848572689415	93.6073303573854	25.4311309940375	9.20471607855974	FALSE	0	1	TRUE	yes	no	yes	FALSE
ENST00000367498.8	IVNS1ABP	D0	D2	protein_coding	protein_coding	191.16997437656	178.217570829576	293.44049401202	59.5014976428082	FALSE	0	1	TRUE	yes	no	no	NA
ENST00000459929.5	IVNS1ABP	D0	D2	protein_coding	processed_transcript	191.16997437656	178.217570829576	293.44049401202	35.4802430799268	NA	0	1	TRUE	NA	NA	NA	NA
ENST00000475046.5	IVNS1ABP	D0	D2	protein_coding	retained_intron	191.16997437656	178.217570829576	293.44049401202	19.4694399681204	NA	1	0.999999	TRUE	NA	NA	NA	NA
ENST00000480769.5	IVNS1ABP	D0	D2	protein_coding	retained_intron	191.16997437656	178.217570829576	293.44049401202	31.4512644347875	NA	1	0.999995	TRUE	NA	NA	NA	NA
ENST00000613909.4	ITIH5	D0	D2	protein_coding	protein_coding	3.25234653051336	3.41730044292475	1.89455388460234	0.404039404032598	FALSE	1	1	TRUE	yes	no	yes	TRUE
ENST00000554543.1	ITGA7	D0	D2	protein_coding	retained_intron	37.400893825886	22.5371966849516	39.5193760434423	3.30552296907067	NA	0	0.0940331	FALSE	NA	NA	NA	TRUE
ENST00000557058.2	ITGA7	D0	D2	protein_coding	retained_intron	37.400893825886	22.5371966849516	39.5193760434423	1.05745985563334	NA	1	1	TRUE	NA	NA	NA	TRUE
ENST00000688413.1	ITGA7	D0	D2	protein_coding	retained_intron	37.400893825886	22.5371966849516	39.5193760434423	23.1370199930567	NA	0	0.608471	TRUE	NA	NA	NA	TRUE
ENST00000416789.1	ITGA6	D0	D2	protein_coding	protein_coding	89.7159226547165	166.217449761633	77.7580140407595	9.52785740634784	FALSE	0	0.999157	TRUE	yes	no	no	NA
ENST00000497107.1	ITGA6	D0	D2	protein_coding	retained_intron	89.7159226547165	166.217449761633	77.7580140407595	8.89407220588145	NA	0	0.0846763	FALSE	NA	NA	NA	NA
ENST00000496487.5	IMPDH1	D0	D2	protein_coding	retained_intron	12.4903641831785	21.4682530612397	10.7063035428789	4.59713507018242	NA	0	0.0974315	FALSE	NA	NA	NA	NA
ENST00000497868.5	IMPDH1	D0	D2	protein_coding	protein_coding	12.4903641831785	21.4682530612397	10.7063035428789	0.613489022703743	FALSE	0	0.641118	TRUE	yes	no	yes	NA
ENST00000510524.5	IFT122	D0	D2	protein_coding	nonsense_mediated_decay	17.8137833655317	15.9572640387978	17.4335146494011	1.25447768890867	NA	0	0.109607	FALSE	NA	NA	NA	TRUE
ENST00000462967.5	IDH3B	D0	D2	protein_coding	retained_intron	48.5500544096329	61.5163798267636	43.8066167783427	6.68914781298197	NA	2	0.999213	TRUE	NA	NA	NA	NA
ENST00000549442.5	HVCN1	D0	D2	protein_coding	protein_coding	18.7654521039016	9.86684196300592	35.4605288872088	2.52519208601539	NA	0	0.266817	FALSE	NA	NA	NA	FALSE
ENST00000247207.7	HSPA2	D0	D2	protein_coding	protein_coding	11.3696810747944	23.482077482516	2.94255799414117	10.4779447576713	FALSE	0	1	TRUE	yes	no	yes	FALSE
ENST00000394709.2	HSPA2	D0	D2	protein_coding	protein_coding	11.3696810747944	23.482077482516	2.94255799414117	0.891736317123075	FALSE	0	1	TRUE	yes	no	yes	FALSE
ENST00000325103.10	HPS1	D0	D2	protein_coding	protein_coding	16.4531827684097	16.9935646226646	17.9526313015906	0.714895705131778	FALSE	0	1	TRUE	yes	no	yes	NA
ENST00000465957.1	HPS1	D0	D2	protein_coding	processed_transcript	16.4531827684097	16.9935646226646	17.9526313015906	7.91718847563531	NA	0	0.0632308	FALSE	NA	NA	NA	NA
ENST00000558278.1	HOMEZ	D0	D2	protein_coding	processed_transcript	10.3857168178233	9.11428431374013	12.2324502524909	2.34071541663554	NA	0	0.0175919	FALSE	NA	NA	NA	TRUE
ENST00000435711.5	HNRNPA3	D0	D2	protein_coding	protein_coding	196.317641412965	335.087614390646	239.358509589371	45.7325048019086	FALSE	1	1	TRUE	yes	no	yes	NA
ENST00000480829.1	HMCN2	D0	D2	protein_coding	retained_intron	1.16877565880108	1.60782413085785	1.18993273147259	0.906681604393774	NA	0	0.999993	TRUE	NA	NA	NA	TRUE
ENST00000683500.2	HMCN2	D0	D2	protein_coding	protein_coding	1.16877565880108	1.60782413085785	1.18993273147259	0.116379851082048	FALSE	0	1	TRUE	yes	yes	yes	TRUE
ENST00000232424.4	HES1	D0	D2	protein_coding	protein_coding	30.9203939144285	18.3611130207308	25.1441702906551	27.5179554511937	FALSE	0	0.999934	TRUE	yes	no	yes	TRUE
ENST00000476918.1	HES1	D0	D2	protein_coding	retained_intron	30.9203939144285	18.3611130207308	25.1441702906551	3.40243846323478	NA	1	0.57812	TRUE	NA	NA	NA	TRUE
ENST00000373700.9	HERC4	D0	D2	protein_coding	protein_coding	56.3513049244633	52.0858050652984	49.7681632555732	14.1268845379959	FALSE	1	1	TRUE	yes	no	no	TRUE
ENST00000395198.7	HERC4	D0	D2	protein_coding	protein_coding	56.3513049244633	52.0858050652984	49.7681632555732	0.879141532720806	FALSE	1	1	TRUE	yes	no	no	TRUE
ENST00000515753.1	HERC4	D0	D2	protein_coding	processed_transcript	56.3513049244633	52.0858050652984	49.7681632555732	20.4898790699772	NA	0	0.0121532	FALSE	NA	NA	NA	TRUE
ENST00000371681.8	HECTD2	D0	D2	protein_coding	protein_coding	8.65570071266803	4.76976756042229	8.24647110556842	1.1997808354031	FALSE	0	0.999156	TRUE	no	no	yes	TRUE
ENST00000498446.1	HECTD2	D0	D2	protein_coding	processed_transcript	8.65570071266803	4.76976756042229	8.24647110556842	1.20382611427327	NA	2	0.286056	FALSE	NA	NA	NA	TRUE
ENST00000405010.7	HDAC9	D0	D2	protein_coding	protein_coding	24.6627875930965	18.6305782604577	4.17466922871337	3.52223856044784	FALSE	0	NA	NA	no	no	no	TRUE
ENST00000411993.1	HDAC9	D0	D2	protein_coding	processed_transcript	24.6627875930965	18.6305782604577	4.17466922871337	1.60430461177689	NA	0	NA	NA	NA	NA	NA	TRUE
ENST00000413380.5	HDAC9	D0	D2	protein_coding	protein_coding	24.6627875930965	18.6305782604577	4.17466922871337	4.86524710965417	FALSE	0	NA	NA	no	no	no	TRUE
ENST00000686413.1	HDAC9	D0	D2	protein_coding	protein_coding	24.6627875930965	18.6305782604577	4.17466922871337	0.348363036147573	FALSE	0	NA	NA	no	no	no	TRUE
ENST00000080059.12	HDAC7	D0	D2	protein_coding	protein_coding	19.6799823797729	36.3140810226053	14.0157371453071	0.98399843033941	FALSE	0	NA	NA	no	no	no	NA
ENST00000548938.5	HDAC7	D0	D2	protein_coding	nonsense_mediated_decay	19.6799823797729	36.3140810226053	14.0157371453071	2.82517987585404	TRUE	0	NA	NA	no	no	no	NA
ENST00000614064.4	GTF2IRD2B	D0	D2	protein_coding	protein_coding	12.6550640800824	6.39190027285761	9.70257840809976	5.52177109594516	NA	0	0.334488	FALSE	NA	NA	NA	TRUE
ENST00000619142.4	GTF2IRD2B	D0	D2	protein_coding	protein_coding	12.6550640800824	6.39190027285761	9.70257840809976	1.73853871972071	FALSE	0	1	TRUE	yes	no	yes	TRUE
ENST00000536375.5	GTF2H3	D0	D2	protein_coding	protein_coding	21.033960368485	24.668426725712	27.7823872658455	0.693067701837048	NA	0	0.476236	FALSE	NA	NA	NA	NA
ENST00000537368.5	GTF2H3	D0	D2	protein_coding	retained_intron	21.033960368485	24.668426725712	27.7823872658455	1.27547147171611	NA	0	0.979558	TRUE	NA	NA	NA	NA
ENST00000467579.7	GSTM2	D0	D2	protein_coding	protein_coding	34.2787379336013	15.932547295752	23.2704669331376	12.0884472094923	NA	0	0.117049	FALSE	NA	NA	NA	TRUE
ENST00000624726.1	GSTM2	D0	D2	protein_coding	TEC	34.2787379336013	15.932547295752	23.2704669331376	5.24774463690621	NA	0	0.971901	TRUE	NA	NA	NA	TRUE
ENST00000505687.5	GRID2	D0	D2	protein_coding	processed_transcript	19.9530322414256	40.2800019297518	25.0964805176202	1.46476703153157	NA	0	NA	NA	NA	NA	NA	NA
ENST00000525757.1	GRAMD1B	D0	D2	protein_coding	processed_transcript	6.44889541472342	6.57272524812547	4.53769652858643	0.378562030193429	NA	0	0.0475279	FALSE	NA	NA	NA	TRUE
ENST00000633646.1	GRAMD1B	D0	D2	protein_coding	protein_coding	6.44889541472342	6.57272524812547	4.53769652858643	0.777164049375929	NA	0	0.172923	FALSE	NA	NA	NA	TRUE
ENST00000643094.1	GPSM2	D0	D2	protein_coding	protein_coding	20.3239695814724	30.064604837818	12.4725168589432	0.677465342536337	NA	0	0.0402288	FALSE	NA	NA	NA	TRUE
ENST00000643921.1	GPSM2	D0	D2	protein_coding	processed_transcript	20.3239695814724	30.064604837818	12.4725168589432	1.55882698014037	NA	0	0.745504	TRUE	NA	NA	NA	TRUE
ENST00000674731.1	GPSM2	D0	D2	protein_coding	nonsense_mediated_decay	20.3239695814724	30.064604837818	12.4725168589432	1.40173634860113	TRUE	0	1	TRUE	yes	no	no	TRUE
ENST00000675086.1	GPSM2	D0	D2	protein_coding	protein_coding	20.3239695814724	30.064604837818	12.4725168589432	2.59356634066204	FALSE	0	1	TRUE	yes	no	yes	TRUE
ENST00000264080.12	GPR108	D0	D2	protein_coding	protein_coding	15.8701458427438	13.8225061727609	16.5697724972999	3.5005068115381	FALSE	1	NA	NA	no	no	no	TRUE
ENST00000598626.5	GPR108	D0	D2	protein_coding	processed_transcript	15.8701458427438	13.8225061727609	16.5697724972999	0.279331800565807	NA	0	NA	NA	NA	NA	NA	TRUE
ENST00000600773.1	GPR108	D0	D2	protein_coding	retained_intron	15.8701458427438	13.8225061727609	16.5697724972999	4.1846275160344	NA	0	NA	NA	NA	NA	NA	TRUE
ENST00000409458.3	GPNMB	D0	D2	protein_coding	protein_coding	4.07843756821484	3.13901360216948	1.7734679812668	1.04695698841947	FALSE	0	0.979013	TRUE	no	yes	no	TRUE
ENST00000468723.1	GPNMB	D0	D2	protein_coding	retained_intron	4.07843756821484	3.13901360216948	1.7734679812668	0.819945402466203	NA	0	0.118474	FALSE	NA	NA	NA	TRUE
ENST00000470994.1	GPNMB	D0	D2	protein_coding	processed_transcript	4.07843756821484	3.13901360216948	1.7734679812668	0.108361900830312	NA	0	0.105131	FALSE	NA	NA	NA	TRUE
ENST00000573224.2	GOSR2	D0	D2	protein_coding	protein_coding	26.5859274108899	27.1512581383702	21.9011916917427	5.39323593081728	FALSE	0	0.999971	TRUE	yes	no	yes	TRUE
ENST00000640051.2	GOSR2	D0	D2	protein_coding	protein_coding	26.5859274108899	27.1512581383702	21.9011916917427	6.33488186157776	FALSE	0	0.980807	TRUE	yes	no	yes	TRUE
ENST00000450791.8	GOLGA3	D0	D2	protein_coding	protein_coding	20.3890893424911	22.9038651559674	16.5033568034047	6.70847062388175	FALSE	0	1	TRUE	no	no	yes	TRUE
ENST00000688114.1	GOLGA3	D0	D2	protein_coding	protein_coding	20.3890893424911	22.9038651559674	16.5033568034047	2.61401659552616	FALSE	0	1	TRUE	no	no	yes	TRUE
ENST00000334049.11	GNAL	D0	D2	protein_coding	protein_coding	47.715624149394	45.4236889137822	119.224235320476	7.86484060884679	FALSE	0	1	TRUE	yes	no	yes	TRUE
ENST00000423027.8	GNAL	D0	D2	protein_coding	protein_coding	47.715624149394	45.4236889137822	119.224235320476	4.15728243165029	FALSE	0	0.999999	TRUE	yes	no	no	TRUE
ENST00000320063.10	GIT2	D0	D2	protein_coding	protein_coding	20.5365259045661	15.8087790997638	26.8421565039075	2.07620890505744	FALSE	0	1	TRUE	yes	no	yes	TRUE
ENST00000548000.5	GIT2	D0	D2	protein_coding	processed_transcript	20.5365259045661	15.8087790997638	26.8421565039075	0.908564538236601	NA	0	0.0996211	FALSE	NA	NA	NA	TRUE
ENST00000550480.1	GIT2	D0	D2	protein_coding	retained_intron	20.5365259045661	15.8087790997638	26.8421565039075	2.38477336511525	NA	0	0.186188	FALSE	NA	NA	NA	TRUE
ENST00000265012.5	GCNT2	D0	D2	protein_coding	protein_coding	43.4597545219114	60.2299102743895	10.6918196666183	15.0498894275146	FALSE	0	0.999996	TRUE	yes	no	no	FALSE
ENST00000316170.9	GCNT2	D0	D2	protein_coding	protein_coding	43.4597545219114	60.2299102743895	10.6918196666183	14.0718776060555	FALSE	0	0.999995	TRUE	yes	no	no	FALSE
ENST00000422207.5	GAS5	D0	D2	lncRNA	retained_intron	379.998115619444	437.734222441757	477.059616436179	30.2441166419665	NA	1	0.0499587	FALSE	NA	NA	NA	NA
ENST00000554916.5	GALC	D0	D2	protein_coding	processed_transcript	21.7014366022548	13.9046693888761	18.4659088891491	0.546540184943872	NA	0	0.0996349	FALSE	NA	NA	NA	FALSE
ENST00000265294.9	GABRP	D0	D2	protein_coding	protein_coding	34.2474833866237	12.6679854368206	30.8157109498359	11.1576737912945	FALSE	0	1	TRUE	yes	yes	no	TRUE
ENST00000519385.5	GABRP	D0	D2	protein_coding	protein_coding	34.2474833866237	12.6679854368206	30.8157109498359	3.82653275871186	FALSE	0	0.999978	TRUE	yes	yes	no	TRUE
ENST00000359707.9	G3BP2	D0	D2	protein_coding	protein_coding	241.824992725232	435.674307871992	177.042466711724	7.42348848463419	FALSE	1	1	TRUE	yes	no	yes	NA
ENST00000395719.7	G3BP2	D0	D2	protein_coding	protein_coding	241.824992725232	435.674307871992	177.042466711724	18.459037940214	FALSE	0	1	TRUE	yes	no	yes	NA
ENST00000425340.3	FUT2	D0	D2	protein_coding	protein_coding	1.28644510897201	1.80443590094085	1.26610944668418	0.961038480209924	FALSE	0	0.999991	TRUE	yes	no	no	TRUE
ENST00000522283.1	FUT2	D0	D2	protein_coding	processed_transcript	1.28644510897201	1.80443590094085	1.26610944668418	0.270228346489917	NA	0	0.0397342	FALSE	NA	NA	NA	TRUE
ENST00000459638.5	FRMD4B	D0	D2	protein_coding	protein_coding	26.5478045695046	7.83180685290528	14.2216492061273	3.01636421496668	NA	0	0.059511	FALSE	NA	NA	NA	FALSE
ENST00000483668.5	FRMD4B	D0	D2	protein_coding	retained_intron	26.5478045695046	7.83180685290528	14.2216492061273	7.33348214460195	NA	0	0.182912	FALSE	NA	NA	NA	FALSE
ENST00000342409.3	FRMD4A	D0	D2	protein_coding	retained_intron	20.3477458733577	33.4992075475165	20.3335873726537	0.808365655796604	NA	0	1	TRUE	NA	NA	NA	TRUE
ENST00000357447.7	FRMD4A	D0	D2	protein_coding	protein_coding	20.3477458733577	33.4992075475165	20.3335873726537	3.34020558739363	FALSE	0	1	TRUE	yes	no	yes	TRUE
ENST00000492155.5	FRMD4A	D0	D2	protein_coding	retained_intron	20.3477458733577	33.4992075475165	20.3335873726537	1.09367223273614	NA	2	0.245074	FALSE	NA	NA	NA	TRUE
ENST00000504715.1	FNIP2	D0	D2	protein_coding	protein_coding	20.0079598001342	5.81481901364251	6.51791321207682	7.74209084763663	NA	0	0.393505	FALSE	NA	NA	NA	TRUE
ENST00000512986.5	FNIP2	D0	D2	protein_coding	protein_coding	20.0079598001342	5.81481901364251	6.51791321207682	3.00004094892526	FALSE	0	0.981908	TRUE	yes	no	yes	TRUE
ENST00000378383.5	FNDC3A	D0	D2	protein_coding	protein_coding	37.4300977403433	25.6443846366726	64.8987794773814	3.33909854836965	FALSE	0	1	TRUE	no	no	yes	NA
ENST00000398316.7	FNDC3A	D0	D2	protein_coding	protein_coding	37.4300977403433	25.6443846366726	64.8987794773814	19.2905915786111	FALSE	0	1	TRUE	yes	no	yes	NA
ENST00000295956.9	FLNB	D0	D2	protein_coding	protein_coding	31.1465669451675	50.1372671614	26.5460117415109	11.8078766706532	FALSE	0	1	TRUE	yes	no	yes	FALSE
ENST00000358537.7	FLNB	D0	D2	protein_coding	protein_coding	31.1465669451675	50.1372671614	26.5460117415109	2.51968357095011	FALSE	0	1	TRUE	yes	no	yes	FALSE
ENST00000493452.5	FLNB	D0	D2	protein_coding	protein_coding	31.1465669451675	50.1372671614	26.5460117415109	0.530661281246069	FALSE	0	1	TRUE	yes	no	yes	FALSE
ENST00000686727.1	FKBP15	D0	D2	protein_coding	nonsense_mediated_decay	9.67631569542289	8.14020892812133	10.0016872524844	0.72623674793796	TRUE	1	1	TRUE	yes	no	yes	NA
ENST00000321562.9	FKBP10	D0	D2	protein_coding	protein_coding	66.4841702630985	65.4538560282889	52.5371985270947	33.3039861847113	FALSE	0	1	TRUE	yes	yes	yes	TRUE
ENST00000223136.5	FIS1	D0	D2	protein_coding	protein_coding	25.6291801180122	38.7284963281498	16.928397279015	18.6104277799168	FALSE	0	0.939651	TRUE	yes	no	no	TRUE
ENST00000474120.5	FIS1	D0	D2	protein_coding	protein_coding	25.6291801180122	38.7284963281498	16.928397279015	2.88091950082086	NA	0	0.320596	FALSE	NA	NA	NA	TRUE
ENST00000473513.5	FGD4	D0	D2	protein_coding	processed_transcript	17.7311153342834	37.5100880671007	12.5007130679903	0.736130653823147	NA	0	0.118932	FALSE	NA	NA	NA	NA
ENST00000550091.5	FGD4	D0	D2	protein_coding	processed_transcript	17.7311153342834	37.5100880671007	12.5007130679903	0.991885892564277	NA	0	0.0171926	FALSE	NA	NA	NA	NA
ENST00000311172.11	FCHSD2	D0	D2	protein_coding	protein_coding	8.20836914376111	5.85003708747124	7.67432100366402	0.813791540101785	FALSE	0	1	TRUE	yes	no	yes	TRUE
ENST00000229758.8	FBXO5	D0	D2	protein_coding	protein_coding	39.6729960572113	79.1602084186151	38.0208002552579	31.422220165626	FALSE	0	1	TRUE	yes	no	no	TRUE
ENST00000367241.3	FBXO5	D0	D2	protein_coding	protein_coding	39.6729960572113	79.1602084186151	38.0208002552579	6.82375994613145	FALSE	0	1	TRUE	yes	no	no	TRUE
ENST00000251547.10	FBXO44	D0	D2	protein_coding	protein_coding	5.27772372803111	6.68070266365543	3.73044830193522	0.463609763952926	FALSE	3	0.999913	TRUE	yes	no	no	TRUE
ENST00000308275.8	FBXO22	D0	D2	protein_coding	protein_coding	43.3458037806727	91.0389494969758	30.0010839280508	6.07994865433831	FALSE	1	0.999997	TRUE	yes	no	no	TRUE
ENST00000569054.5	FBXO22	D0	D2	protein_coding	protein_coding	43.3458037806727	91.0389494969758	30.0010839280508	3.03958382308486	NA	0	0.12136	FALSE	NA	NA	NA	TRUE
ENST00000569749.5	FBXO22	D0	D2	protein_coding	nonsense_mediated_decay	43.3458037806727	91.0389494969758	30.0010839280508	2.24310625257378	TRUE	0	0.904735	TRUE	yes	no	no	TRUE
ENST00000470899.1	FBXO11	D0	D2	protein_coding	retained_intron	51.1523876663822	48.494261935618	51.2651888738016	5.10278485854883	NA	0	0.083618	FALSE	NA	NA	NA	NA
ENST00000493962.6	FBXO11	D0	D2	protein_coding	protein_coding	51.1523876663822	48.494261935618	51.2651888738016	8.64105122944933	NA	0	1	TRUE	NA	NA	NA	NA
ENST00000468509.1	FAM72A	D0	D2	protein_coding	protein_coding	16.2894621535196	43.1150012517738	10.7205957223685	0.695349160867844	NA	0	0.107219	FALSE	NA	NA	NA	FALSE
ENST00000653230.1	FAM66C	D0	D2	lncRNA	lncRNA	4.53391874688011	2.50245797433072	5.07616136201348	1.18664643712533	NA	0	0.172711	FALSE	NA	NA	NA	NA
ENST00000569524.5	FAM219B	D0	D2	protein_coding	nonsense_mediated_decay	18.5956218537516	15.9762705097681	17.3191081848065	3.63333430631916	NA	4	0.0512129	FALSE	NA	NA	NA	NA
ENST00000510163.5	FAM193B	D0	D2	protein_coding	nonsense_mediated_decay	18.4759016145522	22.016950430773	14.5752964118468	0.634725236257963	NA	1	1	TRUE	NA	NA	NA	NA
ENST00000510429.1	FAM193B	D0	D2	protein_coding	protein_coding	18.4759016145522	22.016950430773	14.5752964118468	1.41359571623997	NA	2	0.0618012	FALSE	NA	NA	NA	NA
ENST00000514747.6	FAM193B	D0	D2	protein_coding	protein_coding	18.4759016145522	22.016950430773	14.5752964118468	1.11883863306745	FALSE	2	1	TRUE	yes	no	yes	NA
ENST00000524677.5	FAM193B	D0	D2	protein_coding	protein_coding	18.4759016145522	22.016950430773	14.5752964118468	1.38338062222292	NA	1	1	TRUE	NA	NA	NA	NA
ENST00000389156.9	FAM169A	D0	D2	protein_coding	protein_coding	39.6377664864963	75.5373956388256	50.6457365302112	4.06948004280188	FALSE	0	1	TRUE	no	no	yes	TRUE
ENST00000513277.5	FAM169A	D0	D2	protein_coding	protein_coding	39.6377664864963	75.5373956388256	50.6457365302112	12.5549491998093	NA	0	0.453033	FALSE	NA	NA	NA	TRUE
ENST00000687041.1	FAM169A	D0	D2	protein_coding	protein_coding	39.6377664864963	75.5373956388256	50.6457365302112	8.48188594668418	FALSE	0	1	TRUE	no	no	yes	TRUE
ENST00000373713.7	FABP3	D0	D2	protein_coding	protein_coding	163.665946022656	18.0385389382094	5.38136174922934	82.4725570703421	FALSE	0	0.887237	TRUE	yes	no	no	TRUE
ENST00000682317.1	EZH2	D0	D2	protein_coding	nonsense_mediated_decay	54.4433881123686	55.5107666333799	73.9443729736951	2.86165342171022	TRUE	0	NA	NA	no	no	no	TRUE
ENST00000373863.3	EYA3	D0	D2	protein_coding	protein_coding	23.0716104458343	37.0443379145254	23.2095028524325	8.0055920664092	FALSE	0	1	TRUE	no	no	yes	FALSE
ENST00000265843.9	EXPH5	D0	D2	protein_coding	protein_coding	3.07541206171173	6.40020386307169	1.08949069577329	2.16477151015943	FALSE	1	1	TRUE	no	no	yes	TRUE
ENST00000525344.5	EXPH5	D0	D2	protein_coding	protein_coding	3.07541206171173	6.40020386307169	1.08949069577329	0.718284437708812	FALSE	0	1	TRUE	no	no	yes	TRUE
ENST00000360091.3	EWSR1	D0	D2	protein_coding	protein_coding	232.904054063398	323.457933486767	253.187591041425	25.8780506721946	NA	0	0.999934	TRUE	NA	NA	NA	NA
ENST00000397938.7	EWSR1	D0	D2	protein_coding	protein_coding	232.904054063398	323.457933486767	253.187591041425	27.5762751133766	FALSE	0	1	TRUE	yes	no	yes	NA
ENST00000469669.5	EWSR1	D0	D2	protein_coding	retained_intron	232.904054063398	323.457933486767	253.187591041425	44.7595219501217	NA	1	0.999977	TRUE	NA	NA	NA	NA
ENST00000319397.6	ETS1	D0	D2	protein_coding	protein_coding	12.0434818181245	19.7711493723339	7.66952762300585	0.273002753413607	FALSE	0	1	TRUE	yes	no	no	TRUE
ENST00000392668.8	ETS1	D0	D2	protein_coding	protein_coding	12.0434818181245	19.7711493723339	7.66952762300585	5.0552146795446	FALSE	0	1	TRUE	yes	no	no	TRUE
ENST00000526145.6	ETS1	D0	D2	protein_coding	protein_coding	12.0434818181245	19.7711493723339	7.66952762300585	3.08971974786917	FALSE	0	1	TRUE	yes	no	no	TRUE
ENST00000527676.2	ETS1	D0	D2	protein_coding	processed_transcript	12.0434818181245	19.7711493723339	7.66952762300585	2.00464552372789	NA	0	0.0322665	FALSE	NA	NA	NA	TRUE
ENST00000459955.5	ESRRG	D0	D2	protein_coding	protein_coding	14.7464240269138	2.95566353630803	3.67555866837407	1.88196495389388	NA	0	0.0561975	FALSE	NA	NA	NA	TRUE
ENST00000477799.5	ESRRG	D0	D2	protein_coding	processed_transcript	14.7464240269138	2.95566353630803	3.67555866837407	0.382024877099655	NA	0	0.0111121	FALSE	NA	NA	NA	TRUE
ENST00000394323.3	ERV3-1	D0	D2	protein_coding	protein_coding	24.4780642010402	13.7244845833795	25.3577650833937	13.0520801059353	FALSE	0	1	TRUE	no	yes	no	TRUE
ENST00000535538.1	ERV3-1	D0	D2	protein_coding	processed_transcript	24.4780642010402	13.7244845833795	25.3577650833937	7.022822399546	NA	0	0.0182569	FALSE	NA	NA	NA	TRUE
ENST00000688464.1	ERLEC1	D0	D2	protein_coding	protein_coding	31.5405279816099	44.8440189703275	22.2058241240705	1.75109625107422	FALSE	0	NA	NA	no	no	no	NA
ENST00000611340.5	EPM2A	D0	D2	protein_coding	protein_coding	8.2694744947145	3.48428378773563	7.45266101736315	1.25018834205591	FALSE	1	NA	NA	no	no	no	NA
ENST00000638597.1	EPM2A	D0	D2	protein_coding	processed_transcript	8.2694744947145	3.48428378773563	7.45266101736315	0.426624529621279	NA	0	NA	NA	NA	NA	NA	NA
ENST00000680473.1	EPHA7	D0	D2	protein_coding	processed_transcript	18.4063481718266	12.1372894266602	5.53455309452056	1.42981371529696	NA	0	1	TRUE	NA	NA	NA	TRUE
ENST00000681287.1	EPHA7	D0	D2	protein_coding	retained_intron	18.4063481718266	12.1372894266602	5.53455309452056	2.07406732701292	NA	1	1	TRUE	NA	NA	NA	TRUE
ENST00000681647.1	EPHA7	D0	D2	protein_coding	processed_transcript	18.4063481718266	12.1372894266602	5.53455309452056	1.27798802162632	NA	0	1	TRUE	NA	NA	NA	TRUE
ENST00000343067.9	EPB41	D0	D2	protein_coding	protein_coding	56.5087042514954	102.999220314665	63.3940431121316	5.34574649853207	FALSE	0	1	TRUE	yes	no	yes	TRUE
ENST00000490308.2	EPB41	D0	D2	protein_coding	retained_intron	56.5087042514954	102.999220314665	63.3940431121316	10.3586863990351	NA	0	0.997175	TRUE	NA	NA	NA	TRUE
ENST00000646871.1	EPB41	D0	D2	protein_coding	protein_coding	56.5087042514954	102.999220314665	63.3940431121316	11.4004640374562	NA	0	0.336567	FALSE	NA	NA	NA	TRUE
ENST00000647103.1	EPB41	D0	D2	protein_coding	protein_coding	56.5087042514954	102.999220314665	63.3940431121316	6.76700406597881	FALSE	0	1	TRUE	yes	no	yes	TRUE
ENST00000690443.1	ENSG00000288895	D0	D2	lncRNA	lncRNA	32.8242567088594	87.0685505347656	56.0442112464032	18.933942004538	NA	0	0.387554	FALSE	NA	NA	NA	FALSE
ENST00000693515.1	ENSG00000288895	D0	D2	lncRNA	lncRNA	32.8242567088594	87.0685505347656	56.0442112464032	11.590054570465	NA	0	0.0226476	FALSE	NA	NA	NA	FALSE
ENST00000674246.1	ENSG00000288597	D0	D2	lncRNA	lncRNA	10.2256607534339	6.67257338175713	61.6734332728676	2.13563221256426	NA	0	0.0211161	FALSE	NA	NA	NA	TRUE
ENST00000674271.1	ENSG00000288597	D0	D2	lncRNA	lncRNA	10.2256607534339	6.67257338175713	61.6734332728676	1.24134871345628	NA	0	0.754664	TRUE	NA	NA	NA	TRUE
ENST00000652889.1	ENSG00000287277	D0	D2	lncRNA	lncRNA	54.5345491184074	23.0391923923775	69.0303751491172	38.6658577290509	NA	0	0.0849319	FALSE	NA	NA	NA	TRUE
ENST00000669799.1	ENSG00000287277	D0	D2	lncRNA	lncRNA	54.5345491184074	23.0391923923775	69.0303751491172	13.409361750394	NA	0	1	TRUE	NA	NA	NA	TRUE
ENST00000642083.1	ENSG00000284606	D0	D2	lncRNA	lncRNA	8.98021376255252	1.30269169986787	15.7196422875611	3.17814085419855	NA	0	1	TRUE	NA	NA	NA	TRUE
ENST00000636622.1	ENSG00000283674	D0	D2	lncRNA	lncRNA	57.3204625570491	14.5322978832851	107.759133949175	4.14865634848612	NA	0	0.0607994	FALSE	NA	NA	NA	TRUE
ENST00000636084.1	ENSG00000279668	D0	D2	lncRNA	lncRNA	5.87239173735684	3.65009253541228	4.56519071962868	0.426984710457493	NA	0	0.334653	FALSE	NA	NA	NA	TRUE
ENST00000654174.1	ENSG00000274265	D0	D2	lncRNA	lncRNA	33.6380293954767	20.8920570483945	71.8386160945268	10.8427901456218	NA	0	0.0442152	FALSE	NA	NA	NA	FALSE
ENST00000655610.1	ENSG00000274265	D0	D2	lncRNA	lncRNA	33.6380293954767	20.8920570483945	71.8386160945268	9.0889661591277	NA	0	0.198866	FALSE	NA	NA	NA	FALSE
ENST00000668239.1	ENSG00000274265	D0	D2	lncRNA	lncRNA	33.6380293954767	20.8920570483945	71.8386160945268	1.5015832698425	NA	0	0.0453068	FALSE	NA	NA	NA	FALSE
ENST00000659757.1	ENSG00000268362	D0	D2	lncRNA	lncRNA	20.5757577569028	13.5256533888057	29.2372244614591	2.90975093029583	NA	0	0.0310287	FALSE	NA	NA	NA	NA
ENST00000669127.1	ENSG00000268362	D0	D2	lncRNA	lncRNA	20.5757577569028	13.5256533888057	29.2372244614591	4.59266629099511	NA	0	0.0731744	FALSE	NA	NA	NA	NA
ENST00000670058.1	ENSG00000268362	D0	D2	lncRNA	lncRNA	20.5757577569028	13.5256533888057	29.2372244614591	3.15018908685145	NA	0	0.0440337	FALSE	NA	NA	NA	NA
ENST00000566383.3	ENSG00000261804	D0	D2	lncRNA	lncRNA	4.63166733585718	1.9590653683588	6.10274632235392	0.148434681837622	NA	0	0.02224	FALSE	NA	NA	NA	FALSE
ENST00000691011.1	ENSG00000260834	D0	D2	lncRNA	lncRNA	99.0255256780184	130.551366395717	160.6651340461	40.601783282395	NA	0	0.0585063	FALSE	NA	NA	NA	FALSE
ENST00000519840.1	ENSG00000254277	D0	D2	lncRNA	lncRNA	106.888725301369	190.580932954447	315.175174282162	83.2457119993309	NA	0	0.0786006	FALSE	NA	NA	NA	FALSE
ENST00000693596.1	ENSG00000254277	D0	D2	lncRNA	lncRNA	106.888725301369	190.580932954447	315.175174282162	13.8947346095527	NA	0	0.011897	FALSE	NA	NA	NA	FALSE
ENST00000415499.5	ENSG00000243004	D0	D2	lncRNA	lncRNA	57.4182971989899	79.5293877126716	93.1602980816893	19.7069043287888	NA	0	0.0338924	FALSE	NA	NA	NA	FALSE
ENST00000424516.1	ENSG00000243004	D0	D2	lncRNA	lncRNA	57.4182971989899	79.5293877126716	93.1602980816893	3.5687647874296	NA	0	0.0569357	FALSE	NA	NA	NA	FALSE
ENST00000684832.1	ENSG00000238142	D0	D2	lncRNA	lncRNA	5.6266378427941	8.34410904608576	3.6522763843467	0.929719623938151	NA	1	0.112795	FALSE	NA	NA	NA	TRUE
ENST00000419695.1	ENSG00000236673	D0	D2	lncRNA	lncRNA	41.5480517211178	101.581486399442	47.6874224953274	8.11544465419966	NA	0	0.188455	FALSE	NA	NA	NA	FALSE
ENST00000454596.1	ENSG00000236673	D0	D2	lncRNA	lncRNA	41.5480517211178	101.581486399442	47.6874224953274	27.9770907203181	NA	0	0.080798	FALSE	NA	NA	NA	FALSE
ENST00000451213.2	ENSG00000233184	D0	D2	lncRNA	retained_intron	6.64796309758326	4.62539114481328	6.51330664640199	0.56490679570491	NA	2	0.0838141	FALSE	NA	NA	NA	FALSE
ENST00000654574.2	ENSG00000233184	D0	D2	lncRNA	lncRNA	6.64796309758326	4.62539114481328	6.51330664640199	0.589964470018136	NA	1	0.221325	FALSE	NA	NA	NA	FALSE
ENST00000443928.6	ENSG00000228863	D0	D2	lncRNA	lncRNA	12.1403794236252	9.38899744644855	15.6723627426558	0.109481439689081	NA	0	0.0212783	FALSE	NA	NA	NA	FALSE
ENST00000627180.2	ENSG00000228863	D0	D2	lncRNA	lncRNA	12.1403794236252	9.38899744644855	15.6723627426558	0.476699021976142	NA	0	0.0162574	FALSE	NA	NA	NA	FALSE
ENST00000628340.1	ENSG00000228863	D0	D2	lncRNA	lncRNA	12.1403794236252	9.38899744644855	15.6723627426558	1.08039464796921	NA	0	0.117134	FALSE	NA	NA	NA	FALSE
ENST00000630436.2	ENSG00000228863	D0	D2	lncRNA	lncRNA	12.1403794236252	9.38899744644855	15.6723627426558	10.2996886591041	NA	0	0.119826	FALSE	NA	NA	NA	FALSE
ENST00000436950.6	ENSG00000225889	D0	D2	lncRNA	lncRNA	19.3998684178069	26.7656143454401	31.9603001483346	5.97139137286366	NA	0	0.101566	FALSE	NA	NA	NA	TRUE
ENST00000691049.1	ENSG00000225889	D0	D2	lncRNA	lncRNA	19.3998684178069	26.7656143454401	31.9603001483346	4.89779248030232	NA	1	0.0245528	FALSE	NA	NA	NA	TRUE
ENST00000427067.6	ENPP2	D0	D2	protein_coding	protein_coding	10.1921321084971	5.07476521699365	26.1887501927897	0.714038453063644	FALSE	0	1	TRUE	yes	yes	yes	TRUE
ENST00000273920.8	ENOPH1	D0	D2	protein_coding	protein_coding	45.5899812944156	86.6008145475849	48.9931877668877	31.3845409725996	FALSE	0	0.999994	TRUE	no	no	no	TRUE
ENST00000505846.5	ENOPH1	D0	D2	protein_coding	protein_coding	45.5899812944156	86.6008145475849	48.9931877668877	2.49069459903244	FALSE	0	0.881242	TRUE	no	no	no	TRUE
ENST00000509635.5	ENOPH1	D0	D2	protein_coding	protein_coding	45.5899812944156	86.6008145475849	48.9931877668877	11.7147457227836	FALSE	0	0.995212	TRUE	no	no	no	TRUE
ENST00000530759.1	EMSY-DT	D0	D2	lncRNA	lncRNA	11.2835153911441	18.8681088714961	6.37706313242374	1.74594607756415	NA	0	0.0103375	FALSE	NA	NA	NA	FALSE
ENST00000517975.1	ELP3	D0	D2	protein_coding	protein_coding	52.9578943086213	56.3210756337829	61.1960386379494	2.35984999782888	FALSE	0	NA	NA	no	no	no	NA
ENST00000425053.5	EIF4A2	D0	D2	protein_coding	nonsense_mediated_decay	675.354939744444	990.162227394183	450.055748718012	43.8218505824607	TRUE	0	NA	NA	no	no	no	TRUE
ENST00000440191.6	EIF4A2	D0	D2	protein_coding	protein_coding	675.354939744444	990.162227394183	450.055748718012	78.8291096193691	FALSE	0	NA	NA	no	no	no	TRUE
ENST00000485101.5	EIF4A2	D0	D2	protein_coding	retained_intron	675.354939744444	990.162227394183	450.055748718012	34.0955449581994	NA	8	NA	NA	NA	NA	NA	TRUE
ENST00000494445.1	EIF4A2	D0	D2	protein_coding	retained_intron	675.354939744444	990.162227394183	450.055748718012	42.4456219971074	NA	0	NA	NA	NA	NA	NA	TRUE
ENST00000495049.5	EIF4A2	D0	D2	protein_coding	retained_intron	675.354939744444	990.162227394183	450.055748718012	32.2490638672965	NA	1	NA	NA	NA	NA	NA	TRUE
ENST00000654215.1	EDIL3-DT	D0	D2	lncRNA	lncRNA	3.79759741293729	5.3631026961252	2.68084437345824	0.941220244023158	NA	0	0.0298799	FALSE	NA	NA	NA	FALSE
ENST00000666514.1	EDIL3-DT	D0	D2	lncRNA	lncRNA	3.79759741293729	5.3631026961252	2.68084437345824	0.747535272346658	NA	0	0.0411399	FALSE	NA	NA	NA	FALSE
ENST00000636308.1	DTX2P1-UPK3BP1-PMS2P11	D0	D2	lncRNA	lncRNA	4.80374379611334	5.61308929292977	4.97218269020409	2.42132344999309	NA	0	0.999999	TRUE	NA	NA	NA	FALSE
ENST00000343218.10	DPYSL3	D0	D2	protein_coding	protein_coding	87.2277221318593	188.56856658125	46.1408847631108	14.7217959184249	FALSE	0	1	TRUE	yes	no	yes	TRUE
ENST00000398514.7	DPYSL3	D0	D2	protein_coding	protein_coding	87.2277221318593	188.56856658125	46.1408847631108	65.8900923588364	FALSE	0	1	TRUE	yes	no	yes	TRUE
ENST00000273075.9	DNPEP	D0	D2	protein_coding	protein_coding	9.79547206338471	14.0728954696393	8.30910518014444	2.30582670673764	FALSE	0	1	TRUE	yes	no	no	TRUE
ENST00000373966.5	DNPEP	D0	D2	protein_coding	nonsense_mediated_decay	9.79547206338471	14.0728954696393	8.30910518014444	0.417056581477199	TRUE	0	1	TRUE	no	no	no	TRUE
ENST00000520694.6	DNPEP	D0	D2	protein_coding	protein_coding	9.79547206338471	14.0728954696393	8.30910518014444	0.426377179451159	FALSE	0	1	TRUE	yes	no	no	TRUE
ENST00000521459.5	DNPEP	D0	D2	protein_coding	protein_coding	9.79547206338471	14.0728954696393	8.30910518014444	1.05015731078371	NA	0	0.314393	FALSE	NA	NA	NA	TRUE
ENST00000328111.6	DNMT3B	D0	D2	protein_coding	protein_coding	109.960746402018	310.684758637577	84.1588024156955	100.256549792016	FALSE	0	1	TRUE	yes	no	yes	TRUE
ENST00000348286.6	DNMT3B	D0	D2	protein_coding	protein_coding	109.960746402018	310.684758637577	84.1588024156955	8.31757601406649	FALSE	0	1	TRUE	yes	no	yes	TRUE
ENST00000407479.5	DNASE1	D0	D2	protein_coding	protein_coding	7.8275301266391	7.63408389855515	9.69079580093002	1.73949863524863	FALSE	2	0.999897	TRUE	yes	yes	no	TRUE
ENST00000356433.10	DLL3	D0	D2	protein_coding	protein_coding	11.9601233854501	3.67068884504166	23.4668170040641	6.20278909262879	FALSE	0	1	TRUE	yes	yes	yes	TRUE
ENST00000600437.1	DLL3	D0	D2	protein_coding	retained_intron	11.9601233854501	3.67068884504166	23.4668170040641	3.23054896075233	NA	0	0.999999	TRUE	NA	NA	NA	TRUE
ENST00000247191.7	DLGAP5	D0	D2	protein_coding	protein_coding	103.986543511815	272.111503289847	77.6040025381508	81.9016727071054	FALSE	0	NA	NA	no	no	no	NA
ENST00000395425.6	DLGAP5	D0	D2	protein_coding	protein_coding	103.986543511815	272.111503289847	77.6040025381508	10.9877107404349	FALSE	0	NA	NA	no	no	no	NA
ENST00000491753.2	DLG4	D0	D2	protein_coding	nonsense_mediated_decay	14.6807278171598	18.135233176931	13.864276233652	1.93951362271209	TRUE	0	NA	NA	no	no	no	NA
ENST00000504404.2	DLEU7	D0	D2	protein_coding	protein_coding	1.86787256405345	3.22364219400744	2.48712917872588	0.716728831425794	FALSE	0	0.999183	TRUE	yes	no	yes	TRUE
ENST00000651397.1	DLEU7	D0	D2	protein_coding	processed_transcript	1.86787256405345	3.22364219400744	2.48712917872588	0.692365772139614	NA	0	0.808366	TRUE	NA	NA	NA	TRUE
ENST00000655550.1	DLEU1	D0	D2	lncRNA	lncRNA	17.1061796914214	20.8707754807182	24.8142135269278	3.06760684241537	NA	0	0.11767	FALSE	NA	NA	NA	FALSE
ENST00000324765.13	DIAPH2	D0	D2	protein_coding	protein_coding	15.337173015906	24.5982635858577	37.4819519776252	5.64047615655219	FALSE	0	1	TRUE	yes	no	yes	FALSE
ENST00000373049.8	DIAPH2	D0	D2	protein_coding	protein_coding	15.337173015906	24.5982635858577	37.4819519776252	9.69669685935378	FALSE	0	1	TRUE	yes	no	yes	FALSE
ENST00000342392.3	DIABLO	D0	D2	protein_coding	nonsense_mediated_decay	42.7417530569191	54.6077051366919	40.1038200579152	3.54080604227446	TRUE	0	NA	NA	no	no	no	NA
ENST00000527896.1	DENND5A	D0	D2	protein_coding	nonsense_mediated_decay	41.6572712747363	27.1842147731759	36.9052489842746	0.715835686219851	NA	0	0.324746	FALSE	NA	NA	NA	NA
ENST00000593500.1	DBP	D0	D2	protein_coding	protein_coding	5.76362328673704	4.63630858837702	5.98653516094524	1.73710174971933	FALSE	0	0.874337	TRUE	yes	no	yes	FALSE
ENST00000448521.6	DBNL	D0	D2	protein_coding	protein_coding	19.7638720812453	18.8943447420617	19.9273399844364	2.04004745070648	FALSE	0	1	TRUE	yes	no	yes	NA
ENST00000517654.5	CYRIB	D0	D2	protein_coding	protein_coding	93.4578484911367	181.687821780555	88.7929690897521	16.385896682783	FALSE	0	1	TRUE	yes	no	no	TRUE
ENST00000522250.5	CYRIB	D0	D2	protein_coding	protein_coding	93.4578484911367	181.687821780555	88.7929690897521	4.79722796540135	FALSE	0	0.98719	TRUE	yes	no	no	TRUE
ENST00000522702.5	CYRIB	D0	D2	protein_coding	processed_transcript	93.4578484911367	181.687821780555	88.7929690897521	17.577289747969	NA	0	0.0443249	FALSE	NA	NA	NA	TRUE
ENST00000524608.5	CYB5R2	D0	D2	protein_coding	protein_coding	29.8078801764378	43.592745356226	40.0638925700933	2.10384366349375	FALSE	0	NA	NA	no	no	no	NA
ENST00000532245.5	CTNND1	D0	D2	protein_coding	protein_coding	74.9933349821935	95.4745516530295	58.0881543217042	1.9207003287686	FALSE	0	1	TRUE	yes	no	yes	NA
ENST00000673683.1	CTNND1	D0	D2	protein_coding	protein_coding	74.9933349821935	95.4745516530295	58.0881543217042	14.8029578268353	FALSE	0	1	TRUE	yes	no	yes	NA
ENST00000326434.9	CRELD1	D0	D2	protein_coding	protein_coding	17.2225855415829	11.8162118387378	12.8487334062888	1.01760233217949	FALSE	0	NA	NA	no	no	no	NA
ENST00000482691.2	CRELD1	D0	D2	protein_coding	retained_intron	17.2225855415829	11.8162118387378	12.8487334062888	0.713898537211921	NA	1	NA	NA	NA	NA	NA	NA
ENST00000678404.1	COQ8B	D0	D2	protein_coding	protein_coding	6.34342015117838	5.19940463784363	6.66870004635908	0.401466717825305	FALSE	0	1	TRUE	yes	no	yes	NA
ENST00000553448.1	COQ6	D0	D2	protein_coding	retained_intron	9.50500540598989	5.2714576171529	8.51873159958063	1.23146970809107	NA	0	NA	NA	NA	NA	NA	FALSE
ENST00000372875.3	COQ4	D0	D2	protein_coding	protein_coding	12.4480969469369	12.7573261152497	11.9070837177924	2.37977157783446	FALSE	0	0.952188	TRUE	yes	no	no	TRUE
ENST00000461102.1	COQ4	D0	D2	protein_coding	processed_transcript	12.4480969469369	12.7573261152497	11.9070837177924	2.86250928750737	NA	1	0.0464436	FALSE	NA	NA	NA	TRUE
ENST00000608951.5	COQ4	D0	D2	protein_coding	protein_coding	12.4480969469369	12.7573261152497	11.9070837177924	1.90420648043997	NA	0	0.16901	FALSE	NA	NA	NA	TRUE
ENST00000609948.1	COQ4	D0	D2	protein_coding	protein_coding	12.4480969469369	12.7573261152497	11.9070837177924	1.83820332743495	NA	1	0.089503	FALSE	NA	NA	NA	TRUE
ENST00000400256.5	COLEC12	D0	D2	protein_coding	protein_coding	26.6291268475138	1.3893875403815	33.4201080138642	13.5027222682688	FALSE	0	1	TRUE	yes	no	yes	TRUE
ENST00000582147.1	COLEC12	D0	D2	protein_coding	retained_intron	26.6291268475138	1.3893875403815	33.4201080138642	13.1135743333927	NA	1	1	TRUE	NA	NA	NA	TRUE
ENST00000451716.5	COL27A1	D0	D2	protein_coding	protein_coding	10.2983967214802	6.78976106645428	12.538544011855	3.46444836463099	FALSE	0	1	TRUE	yes	no	yes	TRUE
ENST00000494780.1	COL27A1	D0	D2	protein_coding	processed_transcript	10.2983967214802	6.78976106645428	12.538544011855	0.278733914880344	NA	0	0.179465	FALSE	NA	NA	NA	TRUE
ENST00000484990.1	COL13A1	D0	D2	protein_coding	processed_transcript	31.2705977049583	4.17406790298281	48.9587615870673	3.16383129632809	NA	0	NA	NA	NA	NA	NA	FALSE
ENST00000673830.1	COL13A1	D0	D2	protein_coding	retained_intron	31.2705977049583	4.17406790298281	48.9587615870673	3.20139747782385	NA	0	NA	NA	NA	NA	NA	FALSE
ENST00000521450.5	CNOT8	D0	D2	protein_coding	protein_coding	63.2310319174373	83.4304759395165	63.1094442588987	11.8866283355187	FALSE	0	0.997746	TRUE	yes	no	no	NA
ENST00000522139.1	CNOT8	D0	D2	protein_coding	retained_intron	63.2310319174373	83.4304759395165	63.1094442588987	8.84251629680967	NA	0	0.0716947	FALSE	NA	NA	NA	NA
ENST00000419700.1	CLYBL	D0	D2	protein_coding	protein_coding	6.65172475947587	10.7123609357745	6.40687542457598	0.620172753817623	FALSE	0	NA	NA	no	no	no	TRUE
ENST00000254109.10	CLUHP3	D0	D2	transcribed_unprocessed_pseudogene	processed_transcript	7.66650728772331	5.87285867622462	10.0290268631852	1.6465301938998	NA	0	NA	NA	NA	NA	NA	FALSE
ENST00000690479.1	CLUHP3	D0	D2	transcribed_unprocessed_pseudogene	processed_transcript	7.66650728772331	5.87285867622462	10.0290268631852	0.784967534291694	NA	0	NA	NA	NA	NA	NA	FALSE
ENST00000427926.6	CLTCL1	D0	D2	protein_coding	protein_coding	3.37591455445048	3.38861206222542	2.58368162561875	1.3336847533305	FALSE	0	1	TRUE	yes	no	no	FALSE
ENST00000611723.1	CLTCL1	D0	D2	protein_coding	retained_intron	3.37591455445048	3.38861206222542	2.58368162561875	0.243863733430236	NA	0	0.0809695	FALSE	NA	NA	NA	FALSE
ENST00000580774.2	CHST9	D0	D2	protein_coding	protein_coding	6.60981286076878	7.99077092217347	11.1156337109696	2.7961233630252	FALSE	0	0.999998	TRUE	no	no	no	TRUE
ENST00000581714.5	CHST9	D0	D2	protein_coding	protein_coding	6.60981286076878	7.99077092217347	11.1156337109696	3.08163852307366	FALSE	0	1	TRUE	yes	no	yes	TRUE
ENST00000346248.7	CHST15	D0	D2	protein_coding	protein_coding	2.89885082755044	4.63451178797761	1.75515097621637	0.373463583546328	FALSE	0	NA	NA	no	no	no	FALSE
ENST00000650721.1	CHD1L	D0	D2	protein_coding	nonsense_mediated_decay	35.7165900959272	44.0694702222472	43.9813754309025	1.12054848746196	TRUE	0	1	TRUE	yes	no	no	NA
ENST00000341222.10	CFLAR	D0	D2	protein_coding	protein_coding	41.7311997880087	15.8331703452821	34.38645045943	0.547866172350948	FALSE	0	NA	NA	no	no	no	NA
ENST00000440180.5	CFLAR	D0	D2	protein_coding	protein_coding	41.7311997880087	15.8331703452821	34.38645045943	1.75280914188852	FALSE	1	NA	NA	no	no	no	NA
ENST00000357172.9	CEPT1	D0	D2	protein_coding	protein_coding	32.5121445687137	37.0447989261509	32.6023727500635	13.4674304240928	FALSE	0	1	TRUE	yes	no	no	NA
ENST00000467362.1	CEPT1	D0	D2	protein_coding	processed_transcript	32.5121445687137	37.0447989261509	32.6023727500635	3.16467069130176	NA	0	0.610575	TRUE	NA	NA	NA	NA
ENST00000482730.1	CEP41	D0	D2	protein_coding	retained_intron	6.91137730235841	6.27898045166299	8.48108284171416	0.422514045698011	NA	0	0.0317567	FALSE	NA	NA	NA	NA
ENST00000676115.1	CEP41	D0	D2	protein_coding	nonsense_mediated_decay	6.91137730235841	6.27898045166299	8.48108284171416	0.18265802386841	TRUE	0	0.999998	TRUE	no	no	no	NA
ENST00000532529.1	CEP126	D0	D2	protein_coding	nonsense_mediated_decay	1.91853878734179	1.42323459281175	1.96962112908771	0.771907246989302	NA	0	1	TRUE	NA	NA	NA	TRUE
ENST00000670318.1	CEP126	D0	D2	protein_coding	nonsense_mediated_decay	1.91853878734179	1.42323459281175	1.96962112908771	0.118460986033828	TRUE	0	1	TRUE	yes	no	yes	TRUE
ENST00000675677.1	CEP104	D0	D2	protein_coding	protein_coding	12.5016515426487	12.9162571005858	15.0787215894047	0.62046421413905	FALSE	0	1	TRUE	no	no	yes	TRUE
ENST00000343762.5	CDYL	D0	D2	protein_coding	protein_coding	177.022531636834	327.478649149827	178.811610458608	19.3655938265508	FALSE	0	1	TRUE	yes	no	yes	TRUE
ENST00000397588.8	CDYL	D0	D2	protein_coding	protein_coding	177.022531636834	327.478649149827	178.811610458608	7.80299001602233	FALSE	0	1	TRUE	yes	no	yes	TRUE
ENST00000491864.1	CDYL	D0	D2	protein_coding	nonsense_mediated_decay	177.022531636834	327.478649149827	178.811610458608	15.8655059048025	NA	0	0.0264567	FALSE	NA	NA	NA	TRUE
ENST00000264993.8	CDV3	D0	D2	protein_coding	protein_coding	147.934186932705	202.024279905784	144.128415744899	43.4660348880386	FALSE	1	0.999895	TRUE	yes	no	yes	TRUE
ENST00000420115.6	CDV3	D0	D2	protein_coding	protein_coding	147.934186932705	202.024279905784	144.128415744899	36.411812001297	NA	2	0.456024	FALSE	NA	NA	NA	TRUE
ENST00000508481.5	CDV3	D0	D2	protein_coding	protein_coding	147.934186932705	202.024279905784	144.128415744899	10.2712210596636	FALSE	0	0.983866	TRUE	yes	no	yes	TRUE
ENST00000327331.2	CDCA8	D0	D2	protein_coding	protein_coding	20.2560591559821	42.3358017364074	20.3056408150291	12.4002323304958	FALSE	0	0.999264	TRUE	yes	no	yes	TRUE
ENST00000373055.6	CDCA8	D0	D2	protein_coding	protein_coding	20.2560591559821	42.3358017364074	20.3056408150291	7.85582682548639	FALSE	1	0.999262	TRUE	yes	no	yes	TRUE
ENST00000361309.6	CD47	D0	D2	protein_coding	protein_coding	24.0539534463496	17.1578141806852	21.7266191005428	1.32639612962691	FALSE	0	0.999997	TRUE	yes	yes	no	FALSE
ENST00000517766.5	CD47	D0	D2	protein_coding	protein_coding	24.0539534463496	17.1578141806852	21.7266191005428	5.88494245272557	NA	0	0.0343267	FALSE	NA	NA	NA	FALSE
ENST00000673623.2	CD1D	D0	D2	protein_coding	protein_coding	5.67873110542483	1.94336314027333	18.2770173752519	0.82423520399232	FALSE	0	0.999308	TRUE	yes	yes	no	TRUE
ENST00000673723.4	CD1D	D0	D2	protein_coding	protein_coding	5.67873110542483	1.94336314027333	18.2770173752519	0.540913230098538	FALSE	0	0.999996	TRUE	yes	yes	no	TRUE
ENST00000396212.6	CCP110	D0	D2	protein_coding	protein_coding	11.1764750939549	14.8386933531897	9.64141351244942	2.92201387481699	FALSE	0	1	TRUE	yes	no	yes	FALSE
ENST00000341455.10	CCDC66	D0	D2	protein_coding	nonsense_mediated_decay	51.9701349102215	44.3680570522082	60.0874573241519	4.79695242227077	TRUE	0	1	TRUE	no	no	yes	NA
ENST00000394672.8	CCDC66	D0	D2	protein_coding	protein_coding	51.9701349102215	44.3680570522082	60.0874573241519	4.95844696130095	FALSE	0	1	TRUE	yes	no	yes	NA
ENST00000442522.6	CCDC66	D0	D2	protein_coding	processed_transcript	51.9701349102215	44.3680570522082	60.0874573241519	2.8572234908934	NA	0	0.999956	TRUE	NA	NA	NA	NA
ENST00000472582.5	CCDC66	D0	D2	protein_coding	processed_transcript	51.9701349102215	44.3680570522082	60.0874573241519	3.53391893994876	NA	0	0.983153	TRUE	NA	NA	NA	NA
ENST00000473322.1	CCDC66	D0	D2	protein_coding	retained_intron	51.9701349102215	44.3680570522082	60.0874573241519	3.06102078679037	NA	0	0.924653	TRUE	NA	NA	NA	NA
ENST00000487739.1	CCDC66	D0	D2	protein_coding	retained_intron	51.9701349102215	44.3680570522082	60.0874573241519	8.85089539113923	NA	0	0.0172293	FALSE	NA	NA	NA	NA
ENST00000652010.1	CCDC39	D0	D2	protein_coding	retained_intron	1.64206699505589	1.66873280958614	1.93071920972983	0.255573961007952	NA	1	0.804341	TRUE	NA	NA	NA	TRUE
ENST00000486683.5	CCDC169	D0	D2	protein_coding	processed_transcript	29.5186660066717	37.5641483609558	45.5985839780095	7.544453831637	NA	0	NA	NA	NA	NA	NA	TRUE
ENST00000337620.8	CBX3	D0	D2	protein_coding	protein_coding	147.48537592762	198.846489883802	136.831855043385	17.6858587445443	FALSE	1	0.995018	TRUE	yes	no	yes	NA
ENST00000497498.1	CBX3	D0	D2	protein_coding	processed_transcript	147.48537592762	198.846489883802	136.831855043385	21.2179435921012	NA	1	0.108834	FALSE	NA	NA	NA	NA
ENST00000369318.8	CASP7	D0	D2	protein_coding	protein_coding	6.5844111336615	5.96092913687625	5.29147039538914	2.33454115186878	FALSE	0	0.999999	TRUE	yes	no	no	FALSE
ENST00000621345.4	CASP7	D0	D2	protein_coding	protein_coding	6.5844111336615	5.96092913687625	5.29147039538914	2.24863284840126	FALSE	0	0.999998	TRUE	yes	no	no	FALSE
ENST00000548958.2	CAPS2	D0	D2	protein_coding	processed_transcript	10.6922909137078	4.29875675577223	17.7533607191152	2.18965156250198	NA	0	NA	NA	NA	NA	NA	TRUE
ENST00000523376.5	CALCB	D0	D2	protein_coding	protein_coding	1.13438325248788	2.20448351123999	1.3004537624016	0.333232194140273	FALSE	0	NA	NA	no	no	no	FALSE
ENST00000265431.7	CALB1	D0	D2	protein_coding	protein_coding	18.3623111027831	39.4255230658499	9.55697159767136	8.38351644232628	FALSE	0	0.999981	TRUE	yes	no	no	TRUE
ENST00000514406.2	CALB1	D0	D2	protein_coding	protein_coding	18.3623111027831	39.4255230658499	9.55697159767136	4.02857833820563	NA	0	0.0745819	FALSE	NA	NA	NA	TRUE
ENST00000518457.5	CALB1	D0	D2	protein_coding	protein_coding	18.3623111027831	39.4255230658499	9.55697159767136	3.78889030720299	FALSE	0	0.99935	TRUE	yes	no	no	TRUE
ENST00000399496.8	CABYR	D0	D2	protein_coding	protein_coding	10.4357811562121	19.7387317019182	8.81657313196902	2.08181586600677	FALSE	1	1	TRUE	yes	no	yes	TRUE
ENST00000399499.5	CABYR	D0	D2	protein_coding	protein_coding	10.4357811562121	19.7387317019182	8.81657313196902	0.928116716955009	FALSE	1	1	TRUE	yes	no	yes	TRUE
ENST00000621648.4	CABYR	D0	D2	protein_coding	protein_coding	10.4357811562121	19.7387317019182	8.81657313196902	1.38737824449798	TRUE	1	1	TRUE	yes	no	yes	TRUE
ENST00000325233.3	C8orf34	D0	D2	protein_coding	protein_coding	1.59847460498927	2.48573672226913	1.273948096916	0.595852567956453	FALSE	0	0.997025	TRUE	yes	no	yes	TRUE
ENST00000518698.6	C8orf34	D0	D2	protein_coding	protein_coding	1.59847460498927	2.48573672226913	1.273948096916	0.24759436376296	FALSE	0	1	TRUE	yes	no	yes	TRUE
ENST00000521406.5	C8orf34	D0	D2	protein_coding	nonsense_mediated_decay	1.59847460498927	2.48573672226913	1.273948096916	0.121050769417479	TRUE	0	0.999936	TRUE	yes	no	yes	TRUE
ENST00000406697.5	C1S	D0	D2	protein_coding	protein_coding	5.80024367397196	6.51056762390003	2.26146617249498	0.176454391498071	FALSE	0	1	TRUE	yes	yes	no	TRUE
ENST00000470326.1	C1S	D0	D2	protein_coding	retained_intron	5.80024367397196	6.51056762390003	2.26146617249498	0.304541713830974	NA	0	0.0403551	FALSE	NA	NA	NA	TRUE
ENST00000497061.1	C1S	D0	D2	protein_coding	retained_intron	5.80024367397196	6.51056762390003	2.26146617249498	0.122919744569536	NA	0	0.0304873	FALSE	NA	NA	NA	TRUE
ENST00000300091.5	C18orf54	D0	D2	protein_coding	protein_coding	14.319056719321	18.5741635715479	21.7404832623759	3.19453859070859	FALSE	2	0.997739	TRUE	yes	no	yes	NA
ENST00000535032.7	C17orf80	D0	D2	protein_coding	protein_coding	38.2899231874621	45.3196617457409	44.7983074608771	3.18415877832813	FALSE	0	1	TRUE	no	no	yes	TRUE
ENST00000598368.1	C10orf95-AS1	D0	D2	lncRNA	retained_intron	11.033705530529	22.7867352883298	7.15641533597586	4.08218242827547	NA	0	0.239984	FALSE	NA	NA	NA	FALSE
ENST00000461574.1	BRCA1	D0	D2	protein_coding	protein_coding	25.7750344430769	36.5042115409048	32.4003987389746	0.809403811009502	NA	0	NA	NA	NA	NA	NA	NA
ENST00000306378.11	BPTF	D0	D2	protein_coding	protein_coding	79.93340462406	107.726991646549	69.9860359851401	6.05090671357553	FALSE	1	1	TRUE	yes	no	yes	NA
ENST00000544778.6	BPTF	D0	D2	protein_coding	protein_coding	79.93340462406	107.726991646549	69.9860359851401	6.36228369709164	FALSE	1	1	TRUE	yes	no	yes	NA
ENST00000644067.1	BPTF	D0	D2	protein_coding	protein_coding	79.93340462406	107.726991646549	69.9860359851401	5.65751479481532	FALSE	1	1	TRUE	yes	no	yes	NA
ENST00000490918.5	BPHL	D0	D2	protein_coding	retained_intron	30.3243613392987	43.9178037721902	28.3465948130651	2.37789176806713	NA	2	0.980811	TRUE	NA	NA	NA	NA
ENST00000548925.6	BLOC1S1	D0	D2	protein_coding	protein_coding	31.1406424991361	53.7176898181217	24.4268617669496	24.4483394054005	FALSE	0	0.973004	TRUE	yes	no	yes	TRUE
ENST00000551926.1	BLOC1S1	D0	D2	protein_coding	protein_coding	31.1406424991361	53.7176898181217	24.4268617669496	3.32807803340292	NA	0	0.175513	FALSE	NA	NA	NA	TRUE
ENST00000222547.8	BET1	D0	D2	protein_coding	protein_coding	28.4625567623995	43.298569333628	19.6301203949476	17.2938949057669	NA	1	0.13588	FALSE	NA	NA	NA	TRUE
ENST00000492366.5	BDH2	D0	D2	protein_coding	retained_intron	21.1237151645304	25.6691179440046	12.9784968421873	6.59457277942138	NA	1	0.992188	TRUE	NA	NA	NA	NA
ENST00000504285.5	BDH2	D0	D2	protein_coding	protein_coding	21.1237151645304	25.6691179440046	12.9784968421873	0.979545178534323	NA	0	0.0794625	FALSE	NA	NA	NA	NA
ENST00000555273.1	BAZ1A	D0	D2	protein_coding	retained_intron	36.948707478549	50.0780236277435	33.7379133195042	4.72759048745391	NA	0	0.316854	FALSE	NA	NA	NA	TRUE
ENST00000462374.1	B3GALNT2	D0	D2	protein_coding	processed_transcript	20.742412290947	22.9246505055178	26.5557278268177	1.64657476303408	NA	0	NA	NA	NA	NA	NA	NA
ENST00000557311.6	ATXN3	D0	D2	protein_coding	protein_coding	57.264804615236	85.6798177812196	53.9242054728008	4.60801529061599	FALSE	0	NA	NA	no	no	no	NA
ENST00000485672.2	ATP1A3	D0	D2	protein_coding	retained_intron	4.96927628089802	7.66583959711652	4.3703458055402	1.38437942833193	NA	0	0.922145	TRUE	NA	NA	NA	TRUE
ENST00000645448.1	ATP1A3	D0	D2	protein_coding	retained_intron	4.96927628089802	7.66583959711652	4.3703458055402	0.469242059543337	NA	1	0.688986	TRUE	NA	NA	NA	TRUE
ENST00000405384.6	ATL2	D0	D2	protein_coding	nonsense_mediated_decay	92.4534928364443	126.977739869769	68.2172206622814	4.50123854986112	TRUE	0	NA	NA	no	no	no	TRUE
ENST00000488924.5	ATG7	D0	D2	protein_coding	processed_transcript	13.4870814006128	15.3090928218814	14.9922425104079	0.930497611637035	NA	0	0.0312225	FALSE	NA	NA	NA	TRUE
ENST00000369076.8	ATG5	D0	D2	protein_coding	protein_coding	30.6210952700899	35.809694714851	29.0124429045017	11.7164536750015	FALSE	0	0.999981	TRUE	yes	no	no	TRUE
ENST00000476518.1	ATG5	D0	D2	protein_coding	processed_transcript	30.6210952700899	35.809694714851	29.0124429045017	4.16469346252778	NA	0	0.802212	TRUE	NA	NA	NA	TRUE
ENST00000646025.1	ATG5	D0	D2	protein_coding	nonsense_mediated_decay	30.6210952700899	35.809694714851	29.0124429045017	6.28545838474054	TRUE	0	0.999889	TRUE	yes	no	no	TRUE
ENST00000562396.1	ATF7IP2	D0	D2	protein_coding	retained_intron	23.1265115607701	17.0350129507163	17.9647894693472	3.86071224069053	NA	2	0.100989	FALSE	NA	NA	NA	NA
ENST00000562527.5	ATF7IP2	D0	D2	protein_coding	protein_coding	23.1265115607701	17.0350129507163	17.9647894693472	0.610770031674706	NA	0	0.0292017	FALSE	NA	NA	NA	NA
ENST00000462436.1	ASNS	D0	D2	protein_coding	retained_intron	167.5668139553	212.345724833676	278.57061006517	10.0466819948084	NA	0	0.75621	TRUE	NA	NA	NA	NA
ENST00000636823.1	ASAH1	D0	D2	protein_coding	protein_coding	102.115547666027	78.3525011803883	34.956386935793	9.81099875657026	NA	0	0.0973297	FALSE	NA	NA	NA	FALSE
ENST00000564514.2	ARMC5	D0	D2	protein_coding	nonsense_mediated_decay	3.15762481925586	3.08751381317639	4.01108330719738	0.252159961196332	TRUE	0	NA	NA	no	no	no	TRUE
ENST00000262227.7	ARHGAP28	D0	D2	protein_coding	protein_coding	19.959739757451	12.7621995297019	9.95845948779417	1.04118725506387	FALSE	0	NA	NA	no	no	no	NA
ENST00000532996.5	ARHGAP28	D0	D2	protein_coding	protein_coding	19.959739757451	12.7621995297019	9.95845948779417	0.471775564811616	FALSE	0	NA	NA	no	no	no	NA
ENST00000374170.5	ARHGAP22	D0	D2	protein_coding	protein_coding	7.28776218990055	7.35592581195118	9.10926137609543	0.230763017257248	FALSE	0	1	TRUE	yes	no	yes	TRUE
ENST00000374172.5	ARHGAP22	D0	D2	protein_coding	protein_coding	7.28776218990055	7.35592581195118	9.10926137609543	0.570840184759221	FALSE	0	1	TRUE	yes	no	yes	TRUE
ENST00000493012.2	ARHGAP22	D0	D2	protein_coding	processed_transcript	7.28776218990055	7.35592581195118	9.10926137609543	5.17866814279024	NA	0	0.795572	TRUE	NA	NA	NA	TRUE
ENST00000546293.1	ARAP1	D0	D2	protein_coding	retained_intron	27.4945103792585	26.9843053757915	23.6669312440819	3.0301383466481	NA	1	0.0413971	FALSE	NA	NA	NA	TRUE
ENST00000407997.4	APOBEC3G	D0	D2	protein_coding	protein_coding	13.4724859452621	3.17606047738012	12.1816935518333	9.66375719904007	FALSE	0	1	TRUE	yes	no	no	TRUE
ENST00000463934.1	APOBEC3G	D0	D2	protein_coding	retained_intron	13.4724859452621	3.17606047738012	12.1816935518333	1.5757275850596	NA	0	0.0916328	FALSE	NA	NA	NA	TRUE
ENST00000504305.5	APBB2	D0	D2	protein_coding	protein_coding	44.3234932599461	69.3365987555075	48.2807409657372	1.8869087194373	FALSE	0	0.997967	TRUE	yes	no	no	NA
ENST00000506352.5	APBB2	D0	D2	protein_coding	protein_coding	44.3234932599461	69.3365987555075	48.2807409657372	2.50033670576572	FALSE	0	1	TRUE	yes	no	yes	NA
ENST00000508707.5	APBB2	D0	D2	protein_coding	protein_coding	44.3234932599461	69.3365987555075	48.2807409657372	16.5745787102776	NA	0	0.0339969	FALSE	NA	NA	NA	NA
ENST00000332826.7	ANO9	D0	D2	protein_coding	protein_coding	1.81384278719346	1.8683326347726	2.23694474207958	0.413397951998684	FALSE	0	1	TRUE	yes	no	no	TRUE
ENST00000486778.1	ANKS6	D0	D2	protein_coding	processed_transcript	9.91315872125235	18.0424022156052	10.9820899354578	2.12266244497839	NA	0	0.18052	FALSE	NA	NA	NA	TRUE
ENST00000286918.9	ANKRD9	D0	D2	protein_coding	protein_coding	7.27381621365804	7.50098738407118	2.71826921248705	2.83075761933281	FALSE	0	0.993034	TRUE	no	no	no	TRUE
ENST00000559404.5	ANKRD9	D0	D2	protein_coding	protein_coding	7.27381621365804	7.50098738407118	2.71826921248705	4.00303220544438	NA	0	0.260578	FALSE	NA	NA	NA	TRUE
ENST00000394723.7	ANKHD1	D0	D2	protein_coding	protein_coding	62.8718791960758	91.9954752066655	62.2047133598779	9.19906990940495	FALSE	0	1	TRUE	yes	no	yes	TRUE
ENST00000421134.5	ANKHD1	D0	D2	protein_coding	protein_coding	62.8718791960758	91.9954752066655	62.2047133598779	13.2901354102655	FALSE	2	1	TRUE	yes	no	yes	TRUE
ENST00000511151.5	ANKHD1	D0	D2	protein_coding	protein_coding	62.8718791960758	91.9954752066655	62.2047133598779	2.74106848612167	FALSE	0	0.92261	TRUE	yes	no	yes	TRUE
ENST00000313581.4	ANKAR	D0	D2	protein_coding	protein_coding	4.59658398264944	2.19142420035877	5.12427349410389	0.233808314745812	FALSE	1	1	TRUE	yes	no	no	FALSE
ENST00000467927.1	ANKAR	D0	D2	protein_coding	retained_intron	4.59658398264944	2.19142420035877	5.12427349410389	0.862100042408518	NA	0	0.999927	TRUE	NA	NA	NA	FALSE
ENST00000373425.8	ANGPTL2	D0	D2	protein_coding	protein_coding	10.8668139642981	6.87358999728911	14.3632338387077	5.52289977240236	FALSE	0	1	TRUE	yes	yes	yes	TRUE
ENST00000491991.1	ANGPTL2	D0	D2	protein_coding	processed_transcript	10.8668139642981	6.87358999728911	14.3632338387077	4.40374608219916	NA	0	0.0175893	FALSE	NA	NA	NA	TRUE
ENST00000314845.7	AMBRA1	D0	D2	protein_coding	protein_coding	11.1298592484141	12.1755242263345	9.90615744832623	0.709988717932319	FALSE	0	1	TRUE	no	no	yes	TRUE
ENST00000533727.5	AMBRA1	D0	D2	protein_coding	protein_coding	11.1298592484141	12.1755242263345	9.90615744832623	2.2859062392633	FALSE	0	1	TRUE	no	no	yes	TRUE
ENST00000603173.6	ALOX15P1	D0	D2	transcribed_unprocessed_pseudogene	processed_transcript	3.05412125206503	5.83822161761121	3.05837790236036	1.67819345872145	NA	0	0.0804121	FALSE	NA	NA	NA	FALSE
ENST00000634478.1	ALOX15P1	D0	D2	transcribed_unprocessed_pseudogene	processed_transcript	3.05412125206503	5.83822161761121	3.05837790236036	0.200949634830364	NA	0	0.178045	FALSE	NA	NA	NA	FALSE
ENST00000634558.1	ALOX15P1	D0	D2	transcribed_unprocessed_pseudogene	processed_transcript	3.05412125206503	5.83822161761121	3.05837790236036	0.160542325912152	NA	0	0.126825	FALSE	NA	NA	NA	FALSE
ENST00000634823.1	ALOX15P1	D0	D2	transcribed_unprocessed_pseudogene	processed_transcript	3.05412125206503	5.83822161761121	3.05837790236036	0.909751849136353	NA	0	0.152032	FALSE	NA	NA	NA	FALSE
ENST00000380554.5	AKR1C3	D0	D2	protein_coding	protein_coding	1.44091903490204	2.89880650355782	1.26340958037726	0.735390478420943	FALSE	0	0.999999	TRUE	yes	no	no	TRUE
ENST00000471651.1	AKR1A1	D0	D2	protein_coding	protein_coding	96.2713299934027	158.974001215791	93.5304054837424	13.9291984535877	FALSE	0	0.679791	TRUE	yes	no	no	TRUE
ENST00000497973.5	AKR1A1	D0	D2	protein_coding	processed_transcript	96.2713299934027	158.974001215791	93.5304054837424	19.7603634286634	NA	0	0.909922	TRUE	NA	NA	NA	TRUE
ENST00000621846.4	AKR1A1	D0	D2	protein_coding	protein_coding	96.2713299934027	158.974001215791	93.5304054837424	28.3098618103625	FALSE	0	1	TRUE	yes	no	no	TRUE
ENST00000342266.4	AKAP7	D0	D2	protein_coding	protein_coding	15.0465249413817	24.7648379467173	14.2860990271463	5.06290090234747	NA	1	0.145893	FALSE	NA	NA	NA	TRUE
ENST00000466992.1	AK9	D0	D2	protein_coding	retained_intron	6.78194215365481	3.72417765470117	4.39116634679121	1.86796129618637	NA	0	1	TRUE	NA	NA	NA	TRUE
ENST00000524674.5	AK9	D0	D2	protein_coding	protein_coding	6.78194215365481	3.72417765470117	4.39116634679121	0.882938193845961	NA	0	0.181592	FALSE	NA	NA	NA	TRUE
ENST00000373449.7	AK2	D0	D2	protein_coding	protein_coding	68.9392192999853	92.4206060461257	64.1686112068481	5.50696150390057	FALSE	0	0.990357	TRUE	yes	no	no	TRUE
ENST00000467905.5	AK2	D0	D2	protein_coding	protein_coding	68.9392192999853	92.4206060461257	64.1686112068481	6.77965872652651	FALSE	0	0.999762	TRUE	yes	no	no	TRUE
ENST00000373204.6	AGO1	D0	D2	protein_coding	protein_coding	23.1719358266765	34.7639584637304	31.9618442312272	17.846368417298	FALSE	0	1	TRUE	yes	no	no	FALSE
ENST00000674304.1	AGO1	D0	D2	protein_coding	protein_coding	23.1719358266765	34.7639584637304	31.9618442312272	4.09051163038402	FALSE	0	1	TRUE	yes	no	no	FALSE
ENST00000264436.9	ADD2	D0	D2	protein_coding	protein_coding	38.6956532716926	90.677462444623	40.9583646385695	11.533928490306	FALSE	0	1	TRUE	yes	no	yes	NA
ENST00000462214.5	ADARB1	D0	D2	protein_coding	processed_transcript	10.1579812954927	9.04090625229515	5.37263560455779	0.726423288535719	NA	0	NA	NA	NA	NA	NA	NA
ENST00000509762.1	ADAMTS12	D0	D2	protein_coding	processed_transcript	18.9823731285112	7.40585835291978	3.01155191481839	4.87294103771427	NA	0	0.0594092	FALSE	NA	NA	NA	TRUE
ENST00000360596.7	ACSS2	D0	D2	protein_coding	protein_coding	15.2020453536371	18.9946972882832	7.96082057960551	4.69082284307795	FALSE	1	1	TRUE	yes	no	yes	TRUE
ENST00000470315.1	ACSS2	D0	D2	protein_coding	retained_intron	15.2020453536371	18.9946972882832	7.96082057960551	1.37600106199056	NA	0	0.0226223	FALSE	NA	NA	NA	TRUE
ENST00000527346.5	ACCS	D0	D2	protein_coding	retained_intron	5.87523810443745	2.85197095892534	8.15176537006334	1.55905355337593	NA	3	0.904685	TRUE	NA	NA	NA	TRUE
ENST00000533404.1	ACCS	D0	D2	protein_coding	protein_coding	5.87523810443745	2.85197095892534	8.15176537006334	1.01883989486799	NA	0	0.0308411	FALSE	NA	NA	NA	TRUE
ENST00000358776.7	ACADSB	D0	D2	protein_coding	protein_coding	11.6127323687674	7.93357837059819	9.25192069074051	9.62389299540636	FALSE	0	1	TRUE	yes	no	no	TRUE
ENST00000368869.8	ACADSB	D0	D2	protein_coding	protein_coding	11.6127323687674	7.93357837059819	9.25192069074051	1.03744854068896	FALSE	0	1	TRUE	yes	no	no	TRUE
ENST00000496783.1	ABCG1	D0	D2	protein_coding	retained_intron	2.84847025403612	3.2507943196625	1.05135551639853	0.383627357519381	NA	1	0.999941	TRUE	NA	NA	NA	TRUE
ENST00000334444.11	ABCC5	D0	D2	protein_coding	protein_coding	21.7521060133075	14.3672060316876	19.1026769742924	4.02663967472905	FALSE	0	1	TRUE	yes	no	yes	TRUE
ENST00000427120.6	ABCC5	D0	D2	protein_coding	protein_coding	21.7521060133075	14.3672060316876	19.1026769742924	6.16800345271844	FALSE	2	0.911749	TRUE	no	no	yes	TRUE
ENST00000492216.1	ABCC5	D0	D2	protein_coding	processed_transcript	21.7521060133075	14.3672060316876	19.1026769742924	3.36054899760434	NA	0	0.61139	TRUE	NA	NA	NA	TRUE
ENST00000472574.1	ZNF462	D2	D4	protein_coding	protein_coding	41.6961166772149	24.2809327914252	66.0870881741453	1.62759124685142	NA	0	0.0474534	FALSE	NA	NA	NA	NA
ENST00000461898.1	ZFP64	D2	D4	protein_coding	processed_transcript	17.873133857084	28.1891822170698	12.8888885094645	3.44755445151108	NA	0	0.151613	FALSE	NA	NA	NA	TRUE
ENST00000538098.2	WDR74	D2	D4	protein_coding	protein_coding	37.5195467355047	36.2005129579818	39.8479691930969	9.17224953085876	NA	0	0.0995163	FALSE	NA	NA	NA	TRUE
ENST00000589953.2	WDR62	D2	D4	protein_coding	retained_intron	10.1087284506091	11.1109781442885	8.73837672801051	0.211729336796954	NA	1	0.999957	TRUE	NA	NA	NA	NA
ENST00000436668.5	TTLL4	D2	D4	protein_coding	protein_coding	24.7231212764379	32.6231148390719	29.8970908162162	1.27393667225395	NA	0	0.397213	FALSE	NA	NA	NA	TRUE
ENST00000507285.5	TTC39B	D2	D4	protein_coding	protein_coding	19.3153195749108	55.7879928321727	6.08224386419357	1.12779573986442	FALSE	0	1	TRUE	yes	no	no	NA
ENST00000489546.5	TSGA10	D2	D4	protein_coding	processed_transcript	13.9487555161299	26.0818334420705	12.7316399177163	1.51472012630593	NA	0	0.999758	TRUE	NA	NA	NA	NA
ENST00000532937.1	TRMT44	D2	D4	protein_coding	retained_intron	7.07481122358102	5.16475391545748	8.35298229962466	1.15269781345912	NA	0	0.0224484	FALSE	NA	NA	NA	TRUE
ENST00000344887.10	TNNI3	D2	D4	protein_coding	protein_coding	98.3600135243464	23.0704537452139	30.7406052877843	51.580855987777	FALSE	0	0.998533	TRUE	yes	no	yes	TRUE
ENST00000585806.5	TNNI3	D2	D4	protein_coding	retained_intron	98.3600135243464	23.0704537452139	30.7406052877843	7.26443987709182	NA	0	0.0585539	FALSE	NA	NA	NA	TRUE
ENST00000528110.5	TMX2	D2	D4	protein_coding	nonsense_mediated_decay	38.8449689992366	46.925613427628	33.3122404993302	2.09782573478751	TRUE	0	NA	NA	no	no	no	NA
ENST00000392365.5	TFPI	D2	D4	protein_coding	protein_coding	25.4715471104982	11.0154128001438	70.1231208991009	2.92802348857878	FALSE	0	0.996753	TRUE	yes	yes	no	TRUE
ENST00000435414.5	TFPI	D2	D4	protein_coding	protein_coding	25.4715471104982	11.0154128001438	70.1231208991009	1.50107210957162	NA	0	0.391268	FALSE	NA	NA	NA	TRUE
ENST00000481132.5	TFPI	D2	D4	protein_coding	retained_intron	25.4715471104982	11.0154128001438	70.1231208991009	2.96022436676176	NA	1	0.961849	TRUE	NA	NA	NA	TRUE
ENST00000279386.6	TBX6	D2	D4	protein_coding	protein_coding	21.757547800565	49.6592624385801	14.642116403114	12.204409402896	FALSE	0	1	TRUE	yes	no	yes	FALSE
ENST00000459990.5	SYN3	D2	D4	protein_coding	processed_transcript	10.0140007676023	6.43878641147287	27.261458596483	0.492515999737238	NA	0	0.104807	FALSE	NA	NA	NA	NA
ENST00000323940.9	STRA6	D2	D4	protein_coding	protein_coding	20.5014837928731	36.366099133419	19.9131702988227	4.52177368506359	FALSE	1	1	TRUE	yes	no	no	FALSE
ENST00000395105.9	STRA6	D2	D4	protein_coding	protein_coding	20.5014837928731	36.366099133419	19.9131702988227	3.49483465762176	FALSE	1	1	TRUE	yes	no	no	FALSE
ENST00000553821.3	STON2	D2	D4	protein_coding	protein_coding	13.8517159998803	23.714663616181	12.8214088257193	2.50247200595558	FALSE	0	1	TRUE	yes	no	yes	FALSE
ENST00000614646.5	STON2	D2	D4	protein_coding	protein_coding	13.8517159998803	23.714663616181	12.8214088257193	9.37265941373753	FALSE	0	1	TRUE	yes	no	yes	FALSE
ENST00000432298.5	ST7	D2	D4	protein_coding	protein_coding	16.446022046469	4.23231386931027	12.4149592045387	1.10125274923722	FALSE	1	1	TRUE	yes	no	no	FALSE
ENST00000304886.6	SNAP25	D2	D4	protein_coding	protein_coding	6.42530083761832	3.01086539976107	3.79446920095283	1.20929255785998	FALSE	0	0.999722	TRUE	yes	no	yes	TRUE
ENST00000335753.8	SLK	D2	D4	protein_coding	protein_coding	45.7217021387137	40.5750084887269	34.1559958219487	15.4571966671702	FALSE	0	1	TRUE	yes	no	yes	FALSE
ENST00000369755.4	SLK	D2	D4	protein_coding	protein_coding	45.7217021387137	40.5750084887269	34.1559958219487	21.7069409349646	FALSE	0	1	TRUE	yes	no	yes	FALSE
ENST00000508749.1	SLC35B1	D2	D4	protein_coding	retained_intron	30.2979224424619	29.6112249162308	25.2543055285407	4.00997782363848	NA	0	NA	NA	NA	NA	NA	TRUE
ENST00000372121.5	SLC13A3	D2	D4	protein_coding	protein_coding	4.68925998613724	4.43951028405019	4.53839082719424	0.514069216219384	NA	0	0.417612	FALSE	NA	NA	NA	NA
ENST00000358950.4	SETMAR	D2	D4	protein_coding	protein_coding	10.8888039711128	15.5370911525016	11.8834933337531	0.838838893258759	NA	0	0.228093	FALSE	NA	NA	NA	NA
ENST00000586433.5	SEPTIN9	D2	D4	protein_coding	protein_coding	190.637355614987	214.19466191185	197.348612449569	57.0902377962473	NA	0	0.170981	FALSE	NA	NA	NA	NA
ENST00000676793.1	SEMA6B	D2	D4	protein_coding	protein_coding	15.1312914562193	16.4834107589601	11.9327396967812	0.401709435126295	FALSE	1	1	TRUE	yes	yes	yes	NA
ENST00000643441.1	SEMA3E	D2	D4	protein_coding	processed_transcript	18.770320183682	12.06051711852	53.6681215103092	12.1788049521044	NA	0	1	TRUE	NA	NA	NA	TRUE
ENST00000644381.1	SEMA3E	D2	D4	protein_coding	processed_transcript	18.770320183682	12.06051711852	53.6681215103092	1.62046214272319	NA	0	0.0204126	FALSE	NA	NA	NA	TRUE
ENST00000372360.9	RPS24	D2	D4	protein_coding	protein_coding	3658.19544984369	3521.28406155385	4226.80906864024	2739.99595164572	FALSE	0	0.857642	TRUE	yes	no	yes	NA
ENST00000302558.8	RGPD8	D2	D4	protein_coding	protein_coding	10.251881861639	14.4307464521878	7.53127691878106	1.56717149891411	FALSE	1	NA	NA	no	no	no	TRUE
ENST00000369519.4	RBM20	D2	D4	protein_coding	protein_coding	10.3322581532327	3.10797755377705	9.69679435522333	7.55250595563811	FALSE	0	1	TRUE	no	no	yes	TRUE
ENST00000465774.2	RBM20	D2	D4	protein_coding	retained_intron	10.3322581532327	3.10797755377705	9.69679435522333	2.14074172850276	NA	0	0.04738	FALSE	NA	NA	NA	TRUE
ENST00000471109.1	RALGDS	D2	D4	protein_coding	retained_intron	12.8173852373392	6.01392735919946	14.2766902975551	1.07262104132657	NA	1	NA	NA	NA	NA	NA	NA
ENST00000590866.2	PWWP3A	D2	D4	protein_coding	processed_transcript	22.1335177305502	17.4987950414603	31.6171299993162	1.58092002214028	NA	0	0.0633138	FALSE	NA	NA	NA	NA
ENST00000375360.7	PTPDC1	D2	D4	protein_coding	protein_coding	9.13087843479558	17.3890567368392	6.39779760899465	3.65681670040875	FALSE	0	1	TRUE	yes	no	yes	FALSE
ENST00000376717.6	PRUNE2	D2	D4	protein_coding	protein_coding	9.45607186644065	22.2694774663779	4.44477561490234	0.824502948968145	FALSE	1	1	TRUE	yes	no	yes	TRUE
ENST00000452247.7	PRKG1-AS1	D2	D4	lncRNA	lncRNA	20.516893334748	31.2669046888368	16.7558237911196	0.935128639079562	NA	0	NA	NA	NA	NA	NA	FALSE
ENST00000658196.1	PRKG1-AS1	D2	D4	lncRNA	lncRNA	20.516893334748	31.2669046888368	16.7558237911196	18.106990806892	NA	0	NA	NA	NA	NA	NA	FALSE
ENST00000612492.5	PMP22	D2	D4	protein_coding	protein_coding	17.9921497943839	1.39471200814587	32.6994813398372	3.22198878187701	FALSE	0	0.956349	TRUE	yes	no	no	TRUE
ENST00000675197.1	PMP22	D2	D4	protein_coding	processed_transcript	17.9921497943839	1.39471200814587	32.6994813398372	5.08446412348583	NA	0	0.918153	TRUE	NA	NA	NA	TRUE
ENST00000371375.2	PLCE1	D2	D4	protein_coding	protein_coding	11.0681677540512	1.90443308440048	22.7090613290777	0.745878010408488	FALSE	2	1	TRUE	yes	no	yes	TRUE
ENST00000685253.1	PLCE1	D2	D4	protein_coding	nonsense_mediated_decay	11.0681677540512	1.90443308440048	22.7090613290777	2.30325542962414	TRUE	0	1	TRUE	yes	no	yes	TRUE
ENST00000687948.1	PLCE1	D2	D4	protein_coding	retained_intron	11.0681677540512	1.90443308440048	22.7090613290777	0.705445573300752	NA	0	0.165189	FALSE	NA	NA	NA	TRUE
ENST00000338037.11	PLCB1	D2	D4	protein_coding	protein_coding	28.4683991338971	27.2525643848722	55.873428957116	1.05705855246293	FALSE	0	NA	NA	no	no	no	NA
ENST00000539869.4	PDE10A	D2	D4	protein_coding	protein_coding	9.2025708106482	4.64012488697874	15.8759290010226	1.00253778280933	FALSE	0	NA	NA	no	no	no	TRUE
ENST00000649761.1	PDE10A	D2	D4	protein_coding	processed_transcript	9.2025708106482	4.64012488697874	15.8759290010226	0.529701685354945	NA	0	NA	NA	NA	NA	NA	TRUE
ENST00000454145.5	OSBP2	D2	D4	protein_coding	protein_coding	8.06582794449369	2.3877975336303	4.97011516414021	3.14120462119539	NA	0	0.064757	FALSE	NA	NA	NA	TRUE
ENST00000366704.2	OBSCN	D2	D4	protein_coding	protein_coding	26.7730695346235	19.133700928159	28.4581179211654	1.11274835042475	FALSE	0	1	TRUE	yes	no	yes	NA
ENST00000668629.1	OBSCN	D2	D4	protein_coding	nonsense_mediated_decay	26.7730695346235	19.133700928159	28.4581179211654	2.42850108140293	NA	0	0.0386872	FALSE	NA	NA	NA	NA
ENST00000565187.5	NTAN1	D2	D4	protein_coding	nonsense_mediated_decay	32.725383332519	32.2258505802315	30.0251166270948	5.0188602626549	TRUE	0	0.999501	TRUE	no	no	no	TRUE
ENST00000624579.3	NTAN1	D2	D4	protein_coding	protein_coding	32.725383332519	32.2258505802315	30.0251166270948	4.97792208545077	FALSE	0	0.999501	TRUE	yes	no	no	TRUE
ENST00000312156.8	NFE2	D2	D4	protein_coding	protein_coding	1.76047181321374	2.7841946695555	2.59157114385324	0.262592465126581	FALSE	0	1	TRUE	yes	no	yes	FALSE
ENST00000556196.6	MYO5A	D2	D4	protein_coding	nonsense_mediated_decay	21.5500406210312	13.233471330018	15.163600912219	1.13321835641101	TRUE	0	NA	NA	no	no	no	NA
ENST00000595191.1	MYO1F	D2	D4	protein_coding	retained_intron	2.89592550368181	9.19327029241678	1.30696719743809	0.266946016756773	NA	0	0.128748	FALSE	NA	NA	NA	TRUE
ENST00000644032.2	MYO1F	D2	D4	protein_coding	protein_coding	2.89592550368181	9.19327029241678	1.30696719743809	0.531953162886112	FALSE	1	1	TRUE	yes	no	yes	TRUE
ENST00000530254.6	MYO18A	D2	D4	protein_coding	nonsense_mediated_decay	110.423299186074	95.3650017253314	22.4077572411083	9.10324778744855	NA	0	1	TRUE	NA	NA	NA	NA
ENST00000394809.9	MYLK3	D2	D4	protein_coding	protein_coding	30.4781879997447	5.35695694269478	16.5031144765156	20.1930758644507	FALSE	0	1	TRUE	yes	no	yes	TRUE
ENST00000536476.5	MYLK3	D2	D4	protein_coding	protein_coding	30.4781879997447	5.35695694269478	16.5031144765156	2.74771425435073	FALSE	0	1	TRUE	yes	no	yes	TRUE
ENST00000564731.5	MYLK3	D2	D4	protein_coding	retained_intron	30.4781879997447	5.35695694269478	16.5031144765156	4.84926879563878	NA	0	0.999999	TRUE	NA	NA	NA	TRUE
ENST00000565728.5	MTMR10	D2	D4	protein_coding	retained_intron	15.8043146237424	16.6472152523819	15.0135158259373	1.36714098270356	NA	0	0.999987	TRUE	NA	NA	NA	NA
ENST00000040663.8	MRI1	D2	D4	protein_coding	protein_coding	6.85805112903825	5.5180371891853	6.90995764456494	3.14639915000893	FALSE	0	1	TRUE	yes	no	no	TRUE
ENST00000522534.5	MOK	D2	D4	protein_coding	protein_coding	19.4251893028183	11.771264145403	44.5458678131514	0.937222477507833	FALSE	1	NA	NA	no	no	no	NA
ENST00000559138.5	MOK	D2	D4	protein_coding	nonsense_mediated_decay	19.4251893028183	11.771264145403	44.5458678131514	1.78297635779538	TRUE	1	NA	NA	no	no	no	NA
ENST00000608007.1	MIR9-1HG	D2	D4	lncRNA	lncRNA	4.21183561319389	2.25959959895466	6.19854149577961	0.640621398430042	NA	1	NA	NA	NA	NA	NA	NA
ENST00000380780.5	MID1	D2	D4	protein_coding	protein_coding	32.8956622191202	19.6098477719041	38.7809863280517	3.59520859999904	FALSE	0	1	TRUE	yes	no	no	FALSE
ENST00000400331.10	MACC1	D2	D4	protein_coding	protein_coding	12.1122351932574	18.2359831470305	4.81725178309657	4.32374761767588	FALSE	0	1	TRUE	no	no	no	TRUE
ENST00000526202.5	LMO7	D2	D4	protein_coding	protein_coding	116.460252490012	40.5004214474848	4.7865650464855	8.24547860633444	FALSE	0	1	TRUE	yes	no	yes	NA
ENST00000468859.1	LINC02614	D2	D4	lncRNA	lncRNA	19.1757897404254	15.4342128487291	36.2102254957974	2.35313623736116	NA	2	0.0809255	FALSE	NA	NA	NA	NA
ENST00000594843.1	LINC02614	D2	D4	lncRNA	lncRNA	19.1757897404254	15.4342128487291	36.2102254957974	0.645475953095021	NA	0	0.0174946	FALSE	NA	NA	NA	NA
ENST00000657594.1	LINC02614	D2	D4	lncRNA	lncRNA	19.1757897404254	15.4342128487291	36.2102254957974	0.644305140222614	NA	0	0.0397134	FALSE	NA	NA	NA	NA
ENST00000660015.1	LINC01608	D2	D4	lncRNA	lncRNA	16.3000937317381	18.8649826842238	17.6837080296016	1.0915922538962	NA	0	0.0801866	FALSE	NA	NA	NA	TRUE
ENST00000664704.1	LINC01608	D2	D4	lncRNA	lncRNA	16.3000937317381	18.8649826842238	17.6837080296016	14.5551661693746	NA	0	0.984099	TRUE	NA	NA	NA	TRUE
ENST00000663427.1	LINC00467	D2	D4	lncRNA	lncRNA	43.2069738558977	109.509648493927	23.987745620557	0.872800482467478	NA	0	0.162294	FALSE	NA	NA	NA	NA
ENST00000449684.6	LIMS1	D2	D4	protein_coding	processed_transcript	25.8276240956745	40.6080913565529	16.8577468410329	1.94303522998778	NA	0	0.283848	FALSE	NA	NA	NA	TRUE
ENST00000373480.1	KIAA1522	D2	D4	protein_coding	protein_coding	10.8943867387054	10.8398158468503	11.0795513966803	2.4776967841293	FALSE	0	1	TRUE	no	no	yes	FALSE
ENST00000376452.7	KIAA1217	D2	D4	protein_coding	protein_coding	13.2202073598698	5.88021569163494	10.0598382662278	0.427679988724397	FALSE	0	1	TRUE	yes	no	yes	NA
ENST00000376456.8	KIAA1217	D2	D4	protein_coding	protein_coding	13.2202073598698	5.88021569163494	10.0598382662278	0.251066093603603	FALSE	0	0.999652	TRUE	yes	no	yes	NA
ENST00000372725.6	KAT6B	D2	D4	protein_coding	protein_coding	14.1330817850153	13.246304346785	12.8000210363305	1.32194939063946	FALSE	0	NA	NA	no	no	no	NA
ENST00000674994.1	INF2	D2	D4	protein_coding	nonsense_mediated_decay	8.12135466550355	10.6097253691849	5.6859507587395	0.208242283683463	TRUE	0	NA	NA	no	no	no	TRUE
ENST00000684520.1	HEXA	D2	D4	protein_coding	protein_coding	16.6869573740678	17.8275664122152	16.1349610431156	1.62134373307169	FALSE	2	1	TRUE	yes	yes	no	TRUE
ENST00000489424.5	HDAC10	D2	D4	protein_coding	processed_transcript	2.25397221868515	1.71414400774743	2.60829283912496	0.238595750135734	NA	2	NA	NA	NA	NA	NA	TRUE
ENST00000502896.5	HAND2-AS1	D2	D4	lncRNA	lncRNA	27.6362458138056	3.44857455414588	5.2005295359699	2.46807489758753	NA	2	0.333486	FALSE	NA	NA	NA	FALSE
ENST00000646152.1	HAND2-AS1	D2	D4	lncRNA	lncRNA	27.6362458138056	3.44857455414588	5.2005295359699	2.63234062781942	NA	0	0.0852149	FALSE	NA	NA	NA	FALSE
ENST00000647106.1	HAND2-AS1	D2	D4	lncRNA	lncRNA	27.6362458138056	3.44857455414588	5.2005295359699	1.79477009280798	NA	0	0.0258941	FALSE	NA	NA	NA	FALSE
ENST00000229264.8	GNB3	D2	D4	protein_coding	protein_coding	1.51843197606775	1.05425060446179	2.04222977059743	0.54989103766885	FALSE	0	1	TRUE	yes	no	no	TRUE
ENST00000541916.5	FNDC3A	D2	D4	protein_coding	protein_coding	37.4300977403433	64.8987794773814	34.0510474689592	6.02378574482954	FALSE	0	1	TRUE	yes	no	yes	FALSE
ENST00000558628.1	FMN1	D2	D4	protein_coding	retained_intron	5.54852584986722	14.6580947708146	1.61647309574309	0.439454954198763	NA	0	0.199178	FALSE	NA	NA	NA	TRUE
ENST00000561249.5	FMN1	D2	D4	protein_coding	protein_coding	5.54852584986722	14.6580947708146	1.61647309574309	0.191185086593433	FALSE	0	1	TRUE	yes	no	yes	TRUE
ENST00000672206.1	FMN1	D2	D4	protein_coding	protein_coding	5.54852584986722	14.6580947708146	1.61647309574309	1.63413806782779	FALSE	0	1	TRUE	yes	no	yes	TRUE
ENST00000295956.9	FLNB	D2	D4	protein_coding	protein_coding	31.1465669451675	26.5460117415109	20.5565431590361	11.8078766706532	FALSE	0	1	TRUE	yes	no	yes	FALSE
ENST00000513277.5	FAM169A	D2	D4	protein_coding	protein_coding	39.6377664864963	50.6457365302112	33.5087485416784	12.5549491998093	NA	0	0.453033	FALSE	NA	NA	NA	TRUE
ENST00000612083.5	FAM156A	D2	D4	protein_coding	protein_coding	6.33348229344417	5.76643868579518	9.31727828388252	0.38320893105199	FALSE	0	0.95006	TRUE	yes	no	yes	FALSE
ENST00000622732.5	FAM156A	D2	D4	protein_coding	protein_coding	6.33348229344417	5.76643868579518	9.31727828388252	0.568216798507507	FALSE	0	0.905002	TRUE	yes	no	yes	FALSE
ENST00000546165.6	EXOSC2	D2	D4	protein_coding	protein_coding	49.1119682159745	65.7860344856979	48.2274331122007	1.43676466389403	FALSE	0	0.999935	TRUE	yes	no	no	NA
ENST00000332065.9	EXOC7	D2	D4	protein_coding	protein_coding	40.5719451747629	55.6782768199832	38.9595033826776	17.8919371921905	FALSE	2	1	TRUE	yes	no	no	NA
ENST00000434052.5	ERVK3-1	D2	D4	protein_coding	retained_intron	20.9446328763978	26.8215370523186	19.0272763478404	4.75265308682995	NA	0	0.0908945	FALSE	NA	NA	NA	TRUE
ENST00000608070.5	ERVK3-1	D2	D4	protein_coding	protein_coding	20.9446328763978	26.8215370523186	19.0272763478404	4.1426819489086	NA	0	0.0380618	FALSE	NA	NA	NA	TRUE
ENST00000680473.1	EPHA7	D2	D4	protein_coding	processed_transcript	18.4063481718266	5.53455309452056	19.3034474441749	1.42981371529696	NA	0	1	TRUE	NA	NA	NA	FALSE
ENST00000681647.1	EPHA7	D2	D4	protein_coding	processed_transcript	18.4063481718266	5.53455309452056	19.3034474441749	1.27798802162632	NA	0	1	TRUE	NA	NA	NA	FALSE
ENST00000263713.10	EPB41L5	D2	D4	protein_coding	protein_coding	31.3723903319516	34.9726775558852	30.5588281928312	5.08558557574298	FALSE	0	1	TRUE	yes	no	yes	TRUE
ENST00000443124.5	EPB41L5	D2	D4	protein_coding	protein_coding	31.3723903319516	34.9726775558852	30.5588281928312	11.1319404252879	FALSE	0	1	TRUE	yes	no	yes	TRUE
ENST00000646871.1	EPB41	D2	D4	protein_coding	protein_coding	56.5087042514954	63.3940431121316	52.3158084508492	11.4004640374562	NA	0	0.336567	FALSE	NA	NA	NA	NA
ENST00000673781.1	ENSG00000288534	D2	D4	protein_coding	nonsense_mediated_decay	8.35980974809893	4.46585585275202	12.9456231175004	2.65477478943934	TRUE	0	1	TRUE	no	no	no	FALSE
ENST00000674116.1	ENSG00000288534	D2	D4	protein_coding	nonsense_mediated_decay	8.35980974809893	4.46585585275202	12.9456231175004	5.69383258135024	TRUE	0	1	TRUE	no	no	no	FALSE
ENST00000650727.1	ENSG00000286215	D2	D4	transcribed_processed_pseudogene	processed_transcript	8.57558204468994	20.1601934865914	3.02757252129836	0.830570810206536	NA	0	0.793808	TRUE	NA	NA	NA	TRUE
ENST00000651421.1	ENSG00000286215	D2	D4	transcribed_processed_pseudogene	processed_transcript	8.57558204468994	20.1601934865914	3.02757252129836	0.126249099292609	NA	0	0.0078602	FALSE	NA	NA	NA	TRUE
ENST00000652419.1	ENSG00000286215	D2	D4	transcribed_processed_pseudogene	processed_transcript	8.57558204468994	20.1601934865914	3.02757252129836	0.614929879897049	NA	0	0.0343588	FALSE	NA	NA	NA	TRUE
ENST00000641813.1	ENSG00000284606	D2	D4	lncRNA	lncRNA	8.98021376255252	15.7196422875611	13.8490142981901	5.0045915471804	NA	0	0.388409	FALSE	NA	NA	NA	TRUE
ENST00000642083.1	ENSG00000284606	D2	D4	lncRNA	lncRNA	8.98021376255252	15.7196422875611	13.8490142981901	3.17814085419855	NA	0	1	TRUE	NA	NA	NA	TRUE
ENST00000443928.6	ENSG00000228863	D2	D4	lncRNA	lncRNA	12.1403794236252	15.6723627426558	23.6741888637916	0.109481439689081	NA	0	0.0212783	FALSE	NA	NA	NA	FALSE
ENST00000627180.2	ENSG00000228863	D2	D4	lncRNA	lncRNA	12.1403794236252	15.6723627426558	23.6741888637916	0.476699021976142	NA	0	0.0162574	FALSE	NA	NA	NA	FALSE
ENST00000630436.2	ENSG00000228863	D2	D4	lncRNA	lncRNA	12.1403794236252	15.6723627426558	23.6741888637916	10.2996886591041	NA	0	0.119826	FALSE	NA	NA	NA	FALSE
ENST00000254528.4	EMILIN2	D2	D4	protein_coding	protein_coding	12.7819101126449	4.84906076673361	6.18793562089867	11.0569160528219	FALSE	0	1	TRUE	yes	yes	yes	TRUE
ENST00000308080.9	EMILIN2	D2	D4	protein_coding	processed_transcript	12.7819101126449	4.84906076673361	6.18793562089867	1.59490006444012	NA	0	0.0450934	FALSE	NA	NA	NA	TRUE
ENST00000477397.1	ELN	D2	D4	protein_coding	retained_intron	12.5646912629982	3.61853794342165	14.6060103145042	0.792665051168871	NA	0	0.01178	FALSE	NA	NA	NA	TRUE
ENST00000425053.5	EIF4A2	D2	D4	protein_coding	nonsense_mediated_decay	675.354939744444	450.055748718012	629.345448861167	43.8218505824607	TRUE	0	NA	NA	no	no	no	NA
ENST00000440191.6	EIF4A2	D2	D4	protein_coding	protein_coding	675.354939744444	450.055748718012	629.345448861167	78.8291096193691	FALSE	0	NA	NA	no	no	no	NA
ENST00000413338.5	DYNC1I1	D2	D4	protein_coding	protein_coding	7.04801556475565	1.27068798055773	17.565738586504	2.09603647194551	NA	0	0.418878	FALSE	NA	NA	NA	TRUE
ENST00000348286.6	DNMT3B	D2	D4	protein_coding	protein_coding	109.960746402018	84.1588024156955	52.0705965468407	8.31757601406649	FALSE	0	1	TRUE	yes	no	yes	TRUE
ENST00000637094.1	DNM1	D2	D4	protein_coding	processed_transcript	10.7244100270834	16.0027568826265	11.3319760327606	1.63425470150186	NA	0	NA	NA	NA	NA	NA	NA
ENST00000412726.5	DCC	D2	D4	protein_coding	protein_coding	3.45599878764278	1.39745269889793	6.95008191502389	0.118007652275514	FALSE	0	1	TRUE	yes	no	yes	TRUE
ENST00000442544.7	DCC	D2	D4	protein_coding	protein_coding	3.45599878764278	1.39745269889793	6.95008191502389	0.739730925540198	FALSE	0	1	TRUE	yes	no	yes	TRUE
ENST00000580146.1	DCC	D2	D4	protein_coding	processed_transcript	3.45599878764278	1.39745269889793	6.95008191502389	0.456959240367564	NA	0	0.0690441	FALSE	NA	NA	NA	TRUE
ENST00000469531.1	CREB5	D2	D4	protein_coding	processed_transcript	6.28134426342517	3.9332845364336	1.39440504340074	0.516195748117886	NA	0	0.414557	FALSE	NA	NA	NA	FALSE
ENST00000461720.6	COL11A1	D2	D4	protein_coding	protein_coding	20.7915279480853	15.0720403145691	17.7732145876305	1.86582308921779	FALSE	0	1	TRUE	yes	yes	yes	FALSE
ENST00000224756.12	CCSER2	D2	D4	protein_coding	protein_coding	40.3653390062293	38.187943066334	34.3299620467625	5.21252589299133	FALSE	0	1	TRUE	no	no	yes	NA
ENST00000497498.1	CBX3	D2	D4	protein_coding	processed_transcript	147.48537592762	143.89070475307	142.497554551641	21.2179435921012	NA	1	0.108834	FALSE	NA	NA	NA	NA
ENST00000432109.6	CASP8	D2	D4	protein_coding	protein_coding	5.34832221561324	10.4358545294799	2.92083398828304	0.86268329039633	FALSE	0	1	TRUE	yes	no	no	TRUE
ENST00000265431.7	CALB1	D2	D4	protein_coding	protein_coding	18.3623111027831	9.55697159767136	11.7833438882708	8.38351644232628	FALSE	0	0.999981	TRUE	yes	no	no	TRUE
ENST00000514406.2	CALB1	D2	D4	protein_coding	protein_coding	18.3623111027831	9.55697159767136	11.7833438882708	4.02857833820563	NA	0	0.0745819	FALSE	NA	NA	NA	TRUE
ENST00000648618.1	BMPER	D2	D4	protein_coding	nonsense_mediated_decay	47.9145680332778	1.44092591325056	136.004439566452	11.5209539758171	TRUE	0	1	TRUE	no	yes	no	TRUE
ENST00000299130.7	BCCIP	D2	D4	protein_coding	protein_coding	113.918029415979	121.187961388081	100.678940081277	25.322861545516	FALSE	0	0.999998	TRUE	yes	no	yes	FALSE
ENST00000557311.6	ATXN3	D2	D4	protein_coding	protein_coding	57.264804615236	53.9242054728008	48.2773592863719	4.60801529061599	FALSE	0	NA	NA	no	no	no	TRUE
ENST00000473388.6	ATXN1	D2	D4	protein_coding	processed_transcript	15.7101083090999	3.36408057313862	3.93569302058913	1.22750448340557	NA	0	NA	NA	NA	NA	NA	TRUE
ENST00000543365.5	ARHGAP45	D2	D4	protein_coding	protein_coding	6.8416900725888	7.05400192428296	5.04838978094043	2.42958067949507	FALSE	0	1	TRUE	yes	no	yes	TRUE
ENST00000393609.8	ARAP1	D2	D4	protein_coding	protein_coding	27.4945103792585	23.9069707762167	15.4772639850331	1.25361489947135	FALSE	0	1	TRUE	yes	no	yes	NA
ENST00000589204.1	ALPK2	D2	D4	protein_coding	retained_intron	122.417660116859	9.08655900277521	199.470979442183	3.75071334695827	NA	0	1	TRUE	NA	NA	NA	NA
ENST00000649340.2	ALG11	D2	D4	protein_coding	protein_coding	20.8219038261611	21.3975780304553	23.8128968039328	2.68335324834892	FALSE	0	1	TRUE	yes	no	no	NA
ENST00000294724.8	AGL	D2	D4	protein_coding	protein_coding	35.6198403110557	15.1719488305779	28.1959203221623	7.15410226793896	FALSE	0	1	TRUE	yes	no	no	FALSE
ENST00000488967.5	ACTA2	D2	D4	protein_coding	processed_transcript	71.1220436021815	1.66562207940031	7.31255297970252	2.72585623808006	NA	0	0.649726	TRUE	NA	NA	NA	TRUE
ENST00000498065.1	ZPR1	D30	D4	protein_coding	retained_intron	48.6171837344756	18.3379787102985	44.5611515067063	2.24120988847398	NA	0	0.0450309	FALSE	NA	NA	NA	TRUE
ENST00000418063.3	ZNF90	D30	D4	protein_coding	protein_coding	83.3147093176045	18.0967114579646	72.6691465619605	44.3383615318143	FALSE	0	1	TRUE	yes	no	no	TRUE
ENST00000469078.5	ZNF90	D30	D4	protein_coding	nonsense_mediated_decay	83.3147093176045	18.0967114579646	72.6691465619605	11.6427666868534	TRUE	0	0.688674	TRUE	yes	no	no	TRUE
ENST00000492328.1	ZNF90	D30	D4	protein_coding	processed_transcript	83.3147093176045	18.0967114579646	72.6691465619605	8.71540845523848	NA	0	0.00863971	FALSE	NA	NA	NA	TRUE
ENST00000439326.8	ZNF844	D30	D4	protein_coding	protein_coding	5.44830096895841	9.38652410755969	3.96497504035649	4.0604680696901	FALSE	0	1	TRUE	yes	no	yes	TRUE
ENST00000441304.2	ZNF844	D30	D4	protein_coding	protein_coding	5.44830096895841	9.38652410755969	3.96497504035649	1.14889427703888	FALSE	0	1	TRUE	yes	no	no	TRUE
ENST00000597334.2	ZNF826P	D30	D4	transcribed_unprocessed_pseudogene	processed_transcript	114.107624922955	16.667449651917	130.519510389906	9.99487898557036	NA	0	0.0233538	FALSE	NA	NA	NA	FALSE
ENST00000600513.5	ZNF826P	D30	D4	transcribed_unprocessed_pseudogene	processed_transcript	114.107624922955	16.667449651917	130.519510389906	27.8600116101256	NA	0	0.00583975	FALSE	NA	NA	NA	FALSE
ENST00000627814.3	ZNF793	D30	D4	protein_coding	protein_coding	10.7065999839612	9.25426318364501	12.235497532674	2.33737068940449	FALSE	0	0.999261	TRUE	yes	no	no	FALSE
ENST00000589556.2	ZNF790-AS1	D30	D4	lncRNA	lncRNA	12.4696919292443	6.40318342040818	19.4479423662279	1.99378015446411	NA	1	0.0915869	FALSE	NA	NA	NA	TRUE
ENST00000651864.1	ZNF761	D30	D4	protein_coding	protein_coding	23.2444995497395	9.84818693719001	32.2589983561082	3.04216961162669	NA	0	0.0297321	FALSE	NA	NA	NA	TRUE
ENST00000683779.1	ZNF738	D30	D4	protein_coding	protein_coding	61.2493827018217	34.8872918893844	61.3678365285658	9.50534317075082	FALSE	0	0.999276	TRUE	yes	no	no	TRUE
ENST00000418100.6	ZNF724	D30	D4	protein_coding	protein_coding	59.0362093846441	15.2988875114548	55.5911848476025	49.3331154228092	FALSE	0	1	TRUE	yes	no	no	TRUE
ENST00000597037.1	ZNF724	D30	D4	protein_coding	protein_coding	59.0362093846441	15.2988875114548	55.5911848476025	5.32606279782489	NA	0	0.239014	FALSE	NA	NA	NA	TRUE
ENST00000510175.6	ZNF718	D30	D4	protein_coding	protein_coding	17.1627353884807	7.11495246023998	13.3788110208508	7.10290768030441	FALSE	0	1	TRUE	yes	no	no	TRUE
ENST00000642529.1	ZNF718	D30	D4	protein_coding	nonsense_mediated_decay	17.1627353884807	7.11495246023998	13.3788110208508	2.91923104313719	NA	0	0.124255	FALSE	NA	NA	NA	TRUE
ENST00000600535.1	ZNF714	D30	D4	protein_coding	processed_transcript	47.6298209513468	19.9168939897693	48.2972335098365	2.06431737655874	NA	0	0.0245656	FALSE	NA	NA	NA	FALSE
ENST00000360700.4	ZNF711	D30	D4	protein_coding	protein_coding	30.0549165142169	29.8252450840525	32.0763368226364	5.21186198952345	FALSE	1	1	TRUE	yes	no	yes	TRUE
ENST00000252713.9	ZNF655	D30	D4	protein_coding	protein_coding	52.1937242945835	50.457595336284	55.3789762533186	8.3477989263913	FALSE	0	1	TRUE	yes	no	yes	NA
ENST00000419215.2	ZNF655	D30	D4	protein_coding	processed_transcript	52.1937242945835	50.457595336284	55.3789762533186	12.0107913871124	NA	0	0.999766	TRUE	NA	NA	NA	NA
ENST00000467680.5	ZNF655	D30	D4	protein_coding	retained_intron	52.1937242945835	50.457595336284	55.3789762533186	2.80362542501523	NA	1	0.604652	TRUE	NA	NA	NA	NA
ENST00000494357.1	ZNF655	D30	D4	protein_coding	retained_intron	52.1937242945835	50.457595336284	55.3789762533186	6.84425697839294	NA	1	0.999886	TRUE	NA	NA	NA	NA
ENST00000648973.1	ZNF600	D30	D4	protein_coding	protein_coding	13.4563060630306	4.75878518644344	13.5931905771681	1.07630979751859	FALSE	0	1	TRUE	yes	no	yes	TRUE
ENST00000590751.5	ZNF571	D30	D4	protein_coding	protein_coding	7.78199052722939	4.98089934199641	10.1831714855276	4.20817307589596	FALSE	0	0.764095	TRUE	yes	no	no	TRUE
ENST00000686350.1	ZNF561-AS1	D30	D4	lncRNA	lncRNA	11.1620732339632	9.41288484001821	13.5109551576425	3.0508166941126	NA	0	0.0634066	FALSE	NA	NA	NA	FALSE
ENST00000596677.5	ZNF544	D30	D4	protein_coding	nonsense_mediated_decay	57.7454654417028	28.5225959555209	77.2336637301106	4.62152251028564	TRUE	0	1	TRUE	yes	no	no	TRUE
ENST00000589203.5	ZNF519	D30	D4	protein_coding	processed_transcript	25.5928283726758	11.5522385567345	30.697892503069	3.27356965886991	NA	0	0.105422	FALSE	NA	NA	NA	FALSE
ENST00000534948.2	ZNF518A	D30	D4	protein_coding	retained_intron	31.5455354874076	25.7269502440977	31.5269801940987	7.700331116142	NA	1	1	TRUE	NA	NA	NA	TRUE
ENST00000396077.8	ZNF445	D30	D4	protein_coding	protein_coding	9.51988909970271	7.41367479078026	11.962013331311	2.03160455712679	FALSE	0	1	TRUE	yes	no	yes	FALSE
ENST00000425708.6	ZNF445	D30	D4	protein_coding	protein_coding	9.51988909970271	7.41367479078026	11.962013331311	6.54356459284084	FALSE	0	1	TRUE	yes	no	yes	FALSE
ENST00000314011.9	ZNF436	D30	D4	protein_coding	protein_coding	14.4186937541622	37.9321665286636	6.25080039991539	7.69285733048234	FALSE	0	1	TRUE	yes	no	yes	FALSE
ENST00000374608.3	ZNF436	D30	D4	protein_coding	protein_coding	14.4186937541622	37.9321665286636	6.25080039991539	6.72583642367986	FALSE	0	1	TRUE	yes	no	yes	FALSE
ENST00000358491.9	ZNF429	D30	D4	protein_coding	protein_coding	12.2094694581176	11.1992917514997	11.8713290277845	7.83966853571077	FALSE	0	1	TRUE	yes	no	yes	TRUE
ENST00000596237.5	ZNF429	D30	D4	protein_coding	processed_transcript	12.2094694581176	11.1992917514997	11.8713290277845	2.12906543679681	NA	0	0.0171573	FALSE	NA	NA	NA	TRUE
ENST00000396147.6	ZNF418	D30	D4	protein_coding	protein_coding	16.1832431771042	11.8227801316293	23.6046734001161	2.11164065256649	TRUE	2	1	TRUE	yes	no	no	NA
ENST00000598213.5	ZNF418	D30	D4	protein_coding	processed_transcript	16.1832431771042	11.8227801316293	23.6046734001161	0.567161145562377	NA	0	0.0190537	FALSE	NA	NA	NA	NA
ENST00000361085.9	ZNF37A	D30	D4	protein_coding	protein_coding	10.7348478796543	13.5519268428067	11.4755972061289	1.12247759125886	FALSE	0	1	TRUE	yes	no	no	FALSE
ENST00000520377.1	ZNF354B	D30	D4	protein_coding	protein_coding	13.728016218637	9.42733414574548	21.0580152546744	2.86510628506299	FALSE	0	NA	NA	no	no	no	TRUE
ENST00000449416.6	ZNF331	D30	D4	protein_coding	protein_coding	22.1576046513983	10.7601792652346	25.737561407699	0.889042097720354	FALSE	0	0.999998	TRUE	yes	no	no	FALSE
ENST00000511593.6	ZNF331	D30	D4	protein_coding	protein_coding	22.1576046513983	10.7601792652346	25.737561407699	3.25010732789709	FALSE	0	1	TRUE	yes	no	no	FALSE
ENST00000514374.5	ZNF331	D30	D4	protein_coding	protein_coding	22.1576046513983	10.7601792652346	25.737561407699	0.679835422612047	NA	0	0.0527959	FALSE	NA	NA	NA	FALSE
ENST00000593618.5	ZNF320	D30	D4	protein_coding	protein_coding	36.7125328969463	25.3390709733782	43.2502903863837	4.41983339683031	FALSE	1	NA	NA	no	no	no	TRUE
ENST00000682928.1	ZNF320	D30	D4	protein_coding	protein_coding	36.7125328969463	25.3390709733782	43.2502903863837	2.14474611113221	FALSE	2	NA	NA	no	no	no	TRUE
ENST00000606599.1	ZNF318	D30	D4	protein_coding	protein_coding	13.9202061713589	12.0796965350735	14.2481940703154	0.154830589770175	NA	0	0.180343	FALSE	NA	NA	NA	NA
ENST00000446502.6	ZNF302	D30	D4	protein_coding	protein_coding	37.6781194198527	40.8547389366875	42.2809885083917	5.10718551931787	FALSE	1	1	TRUE	yes	no	no	TRUE
ENST00000505163.5	ZNF302	D30	D4	protein_coding	protein_coding	37.6781194198527	40.8547389366875	42.2809885083917	8.71880292820548	NA	0	0.149085	FALSE	NA	NA	NA	TRUE
ENST00000505365.2	ZNF302	D30	D4	protein_coding	protein_coding	37.6781194198527	40.8547389366875	42.2809885083917	1.86760532706804	FALSE	0	0.99999	TRUE	yes	no	no	TRUE
ENST00000509196.1	ZNF302	D30	D4	protein_coding	retained_intron	37.6781194198527	40.8547389366875	42.2809885083917	3.26728166090065	NA	0	0.999993	TRUE	NA	NA	NA	TRUE
ENST00000562530.5	ZNF276	D30	D4	protein_coding	nonsense_mediated_decay	10.273660468499	10.1229093134323	13.8457055438625	0.277061850089952	TRUE	0	0.99997	TRUE	yes	no	yes	FALSE
ENST00000569426.1	ZNF276	D30	D4	protein_coding	retained_intron	10.273660468499	10.1229093134323	13.8457055438625	1.27652313759957	NA	0	0.194799	FALSE	NA	NA	NA	FALSE
ENST00000429434.3	ZNF140	D30	D4	protein_coding	protein_coding	16.7576424960653	12.2269091380677	21.2664788650442	1.37278130153978	NA	1	0.164743	FALSE	NA	NA	NA	NA
ENST00000415440.3	ZNF101	D30	D4	protein_coding	retained_intron	18.6059815076688	4.54000654631473	12.8103695253372	0.910864156311268	NA	0	0.255842	FALSE	NA	NA	NA	FALSE
ENST00000330236.7	ZKSCAN8	D30	D4	protein_coding	protein_coding	13.8597040066312	18.1976830621215	14.2869734908768	11.6673267937823	FALSE	0	NA	NA	no	no	no	TRUE
ENST00000457389.6	ZKSCAN8	D30	D4	protein_coding	protein_coding	13.8597040066312	18.1976830621215	14.2869734908768	0.802662389664294	FALSE	0	NA	NA	no	no	no	TRUE
ENST00000536028.2	ZKSCAN8	D30	D4	protein_coding	nonsense_mediated_decay	13.8597040066312	18.1976830621215	14.2869734908768	0.690288097140607	TRUE	0	NA	NA	no	no	no	TRUE
ENST00000606198.5	ZKSCAN8	D30	D4	protein_coding	nonsense_mediated_decay	13.8597040066312	18.1976830621215	14.2869734908768	0.699426726043975	TRUE	0	NA	NA	no	no	no	TRUE
ENST00000510158.5	ZFYVE16	D30	D4	protein_coding	protein_coding	37.0386390945615	47.2463149339012	40.2045324162678	4.28010764691749	FALSE	0	1	TRUE	yes	no	yes	NA
ENST00000512442.1	ZFYVE16	D30	D4	protein_coding	processed_transcript	37.0386390945615	47.2463149339012	40.2045324162678	3.19168344264571	NA	0	0.00628742	FALSE	NA	NA	NA	NA
ENST00000268489.10	ZFHX3	D30	D4	protein_coding	protein_coding	3.14336265588322	5.17486147997991	2.83917101856139	1.17465640818407	FALSE	0	1	TRUE	yes	no	yes	TRUE
ENST00000563625.1	ZFHX3	D30	D4	protein_coding	retained_intron	3.14336265588322	5.17486147997991	2.83917101856139	0.227657041282639	NA	0	0.0506536	FALSE	NA	NA	NA	TRUE
ENST00000296127.7	ZDHHC3	D30	D4	protein_coding	protein_coding	20.4149137438266	15.1512631541129	18.4237331193438	9.28308421998832	FALSE	0	0.999989	TRUE	yes	no	no	FALSE
ENST00000339420.7	ZDHHC3	D30	D4	protein_coding	protein_coding	20.4149137438266	15.1512631541129	18.4237331193438	4.36201193666587	FALSE	0	0.999999	TRUE	yes	no	no	FALSE
ENST00000420089.5	ZDHHC16	D30	D4	protein_coding	protein_coding	24.6683345379678	20.7404058900216	29.124644766056	1.09481884813438	NA	0	0.779654	TRUE	NA	NA	NA	NA
ENST00000393514.9	ZC3H14	D30	D4	protein_coding	protein_coding	66.8080563419829	47.6876499282853	79.1925997098299	11.4617972879558	FALSE	0	NA	NA	no	no	no	FALSE
ENST00000482689.5	ZBTB20	D30	D4	protein_coding	protein_coding	11.703187508728	38.2937801981783	3.12480386073315	0.959395889834899	NA	0	0.113353	FALSE	NA	NA	NA	FALSE
ENST00000488663.1	ZBTB20	D30	D4	protein_coding	processed_transcript	11.703187508728	38.2937801981783	3.12480386073315	0.591585450724947	NA	0	0.0194629	FALSE	NA	NA	NA	FALSE
ENST00000295566.8	YY1AP1	D30	D4	protein_coding	protein_coding	47.5865278606779	59.8980296652442	39.4209907715784	2.12416846217627	FALSE	0	1	TRUE	no	no	yes	TRUE
ENST00000427324.5	YME1L1	D30	D4	protein_coding	protein_coding	89.1107396282562	107.97776531434	51.4603003652952	11.2511911594677	NA	0	0.486427	FALSE	NA	NA	NA	TRUE
ENST00000463270.1	YME1L1	D30	D4	protein_coding	processed_transcript	89.1107396282562	107.97776531434	51.4603003652952	11.1369557688122	NA	0	0.384325	FALSE	NA	NA	NA	TRUE
ENST00000552949.1	YEATS4	D30	D4	protein_coding	retained_intron	45.973340771623	20.6888914798402	47.0965480737173	9.06495264294169	NA	0	0.0743522	FALSE	NA	NA	NA	TRUE
ENST00000540975.5	YBX3	D30	D4	protein_coding	processed_transcript	157.889547402142	100.34874396236	113.925060130932	68.8120017106567	NA	0	0.353611	FALSE	NA	NA	NA	TRUE
ENST00000542002.5	YBX3	D30	D4	protein_coding	retained_intron	157.889547402142	100.34874396236	113.925060130932	4.27904627628771	NA	0	0.269728	FALSE	NA	NA	NA	TRUE
ENST00000367589.3	XPR1	D30	D4	protein_coding	protein_coding	31.1347601462785	39.9701163672126	23.3679649616057	15.0611370042494	FALSE	0	1	TRUE	yes	no	no	TRUE
ENST00000367590.9	XPR1	D30	D4	protein_coding	protein_coding	31.1347601462785	39.9701163672126	23.3679649616057	15.1029692397144	FALSE	0	1	TRUE	yes	no	no	TRUE
ENST00000590402.1	WIPI1	D30	D4	protein_coding	retained_intron	23.1592991620233	34.4740226486899	11.1554041356813	3.33412437991993	NA	0	0.54541	TRUE	NA	NA	NA	TRUE
ENST00000450114.7	WEE1	D30	D4	protein_coding	protein_coding	92.7029604077604	98.2170802377364	54.9928965197491	8.19541922015652	FALSE	0	1	TRUE	yes	no	yes	FALSE
ENST00000527848.1	WEE1	D30	D4	protein_coding	protein_coding	92.7029604077604	98.2170802377364	54.9928965197491	12.4330558139125	NA	0	0.412855	FALSE	NA	NA	NA	FALSE
ENST00000254442.8	WDR7	D30	D4	protein_coding	protein_coding	14.4830071705928	15.0385330616766	13.9595717259931	0.506372795500554	FALSE	1	NA	NA	no	no	no	TRUE
ENST00000548195.5	WASHC4	D30	D4	protein_coding	protein_coding	57.3576300804433	41.6249874602362	61.8400175346618	3.95740634720539	NA	0	0.168586	FALSE	NA	NA	NA	TRUE
ENST00000620430.5	WASHC4	D30	D4	protein_coding	protein_coding	57.3576300804433	41.6249874602362	61.8400175346618	6.04565283116703	FALSE	0	1	TRUE	yes	no	no	TRUE
ENST00000374362.6	WASHC2C	D30	D4	protein_coding	protein_coding	85.2509111888985	40.2335115960173	126.512690911423	2.28982311778558	FALSE	0	1	TRUE	yes	no	yes	NA
ENST00000351071.11	WASHC2A	D30	D4	protein_coding	protein_coding	34.0352690899133	22.8103454463295	45.1224539773355	2.54501441183508	FALSE	0	1	TRUE	yes	no	yes	TRUE
ENST00000361352.9	VWA5A	D30	D4	protein_coding	protein_coding	24.765114725789	12.2073493245191	13.995303116383	6.09050245795795	FALSE	0	1	TRUE	yes	no	no	FALSE
ENST00000417641.6	VRK2	D30	D4	protein_coding	protein_coding	21.7162184284052	11.065719642676	21.8454084575826	1.27429708473246	FALSE	0	NA	NA	no	no	no	NA
ENST00000428021.1	VRK2	D30	D4	protein_coding	protein_coding	21.7162184284052	11.065719642676	21.8454084575826	1.15566352272559	FALSE	0	NA	NA	no	no	no	NA
ENST00000424463.4	VPS8	D30	D4	protein_coding	protein_coding	69.74137503091	123.420981519863	51.2119825482663	3.56262806012864	FALSE	1	0.986977	TRUE	no	no	no	NA
ENST00000436792.6	VPS8	D30	D4	protein_coding	protein_coding	69.74137503091	123.420981519863	51.2119825482663	10.2933224566591	FALSE	0	1	TRUE	yes	no	yes	NA
ENST00000625842.3	VPS8	D30	D4	protein_coding	protein_coding	69.74137503091	123.420981519863	51.2119825482663	4.2634459260269	FALSE	0	1	TRUE	yes	no	yes	NA
ENST00000463486.5	VPS52	D30	D4	protein_coding	processed_transcript	25.0344670498338	19.8920120019501	23.827097399765	1.52243820174502	NA	0	0.244787	FALSE	NA	NA	NA	NA
ENST00000358544.7	VPS13B	D30	D4	protein_coding	protein_coding	16.3832745566939	23.6085927155061	18.8721303413897	0.789166315004657	FALSE	0	NA	NA	no	no	no	FALSE
ENST00000521932.1	VPS13B	D30	D4	protein_coding	processed_transcript	16.3832745566939	23.6085927155061	18.8721303413897	0.864089628045634	NA	0	NA	NA	NA	NA	NA	FALSE
ENST00000588617.1	VMP1	D30	D4	protein_coding	processed_transcript	80.634840129594	172.141667607252	59.2592761106954	5.71407981479237	NA	0	0.0213815	FALSE	NA	NA	NA	TRUE
ENST00000592619.5	VMP1	D30	D4	protein_coding	nonsense_mediated_decay	80.634840129594	172.141667607252	59.2592761106954	4.32514319890398	NA	0	0.979559	TRUE	NA	NA	NA	TRUE
ENST00000592790.1	VMP1	D30	D4	protein_coding	retained_intron	80.634840129594	172.141667607252	59.2592761106954	17.4625340681202	NA	2	0.167115	FALSE	NA	NA	NA	TRUE
ENST00000480614.1	VEGFA	D30	D4	protein_coding	retained_intron	194.297444216884	364.59095886967	164.834187964748	4.78459668994485	NA	4	0.668657	TRUE	NA	NA	NA	TRUE
ENST00000493786.2	VEGFA	D30	D4	protein_coding	retained_intron	194.297444216884	364.59095886967	164.834187964748	15.9382015173809	NA	0	0.175648	FALSE	NA	NA	NA	TRUE
ENST00000672860.3	VEGFA	D30	D4	protein_coding	protein_coding	194.297444216884	364.59095886967	164.834187964748	39.1258000360125	FALSE	0	0.979268	TRUE	yes	no	yes	TRUE
ENST00000521158.5	VDAC3	D30	D4	protein_coding	protein_coding	97.821242267407	147.328121530984	74.9688256601804	6.23183238216994	FALSE	0	0.999992	TRUE	yes	no	no	FALSE
ENST00000521348.5	VDAC3	D30	D4	protein_coding	retained_intron	97.821242267407	147.328121530984	74.9688256601804	5.42990400124648	NA	0	0.990858	TRUE	NA	NA	NA	FALSE
ENST00000513016.5	VCAN	D30	D4	protein_coding	processed_transcript	236.342955765204	422.955115483282	235.561385674305	17.3226819571694	NA	0	1	TRUE	NA	NA	NA	NA
ENST00000356136.8	UVRAG	D30	D4	protein_coding	protein_coding	13.5295560827368	18.1138509500106	14.3327327501136	2.26392430836707	FALSE	0	1	TRUE	yes	no	yes	NA
ENST00000334352.8	USP16	D30	D4	protein_coding	protein_coding	30.3974608678662	28.1876093501733	28.3483597998053	2.26469138418639	FALSE	0	1	TRUE	yes	no	yes	FALSE
ENST00000264904.8	USO1	D30	D4	protein_coding	protein_coding	129.480771260571	72.0320268859801	91.4418097007409	10.0020007283249	FALSE	0	1	TRUE	yes	no	yes	FALSE
ENST00000512893.1	USO1	D30	D4	protein_coding	retained_intron	129.480771260571	72.0320268859801	91.4418097007409	2.2652922132345	NA	0	0.0757762	FALSE	NA	NA	NA	FALSE
ENST00000514213.7	USO1	D30	D4	protein_coding	protein_coding	129.480771260571	72.0320268859801	91.4418097007409	114.955007570982	FALSE	0	1	TRUE	yes	no	yes	FALSE
ENST00000632800.1	UCKL1	D30	D4	protein_coding	processed_transcript	11.374374300347	13.8086162218401	7.58224494130451	0.817376257729868	NA	0	0.285344	FALSE	NA	NA	NA	TRUE
ENST00000672724.1	UBE4B	D30	D4	protein_coding	protein_coding	34.8840340248968	24.5851802320286	42.4789617352983	1.84196343254051	FALSE	0	1	TRUE	yes	no	yes	TRUE
ENST00000471154.1	UBE2J2	D30	D4	protein_coding	retained_intron	40.2296588275278	18.6248947667154	46.0149181083647	0.438668731888569	NA	0	NA	NA	NA	NA	NA	NA
ENST00000499038.2	UBE2B	D30	D4	protein_coding	processed_transcript	48.4523405115193	62.2417938139929	46.9327160155682	17.4114531174171	NA	0	NA	NA	NA	NA	NA	FALSE
ENST00000665294.1	UBA6-DT	D30	D4	lncRNA	lncRNA	9.5975778122735	11.3792356258701	10.2250693699571	0.572858671269352	NA	0	0.0318508	FALSE	NA	NA	NA	NA
ENST00000508779.1	TXNDC15	D30	D4	protein_coding	protein_coding	44.1491131561574	59.2321530925066	37.5997231721624	5.95277315587574	NA	0	NA	NA	NA	NA	NA	FALSE
ENST00000373609.1	TXLNA	D30	D4	protein_coding	protein_coding	21.8421684343437	15.6157318812467	19.6006387729142	7.75379859028125	FALSE	0	1	TRUE	yes	no	yes	FALSE
ENST00000373610.8	TXLNA	D30	D4	protein_coding	protein_coding	21.8421684343437	15.6157318812467	19.6006387729142	14.0883698440625	FALSE	0	1	TRUE	yes	no	yes	FALSE
ENST00000251412.8	TUBG2	D30	D4	protein_coding	protein_coding	8.85521509600326	8.70739124699004	9.06380777544216	5.50025642204092	FALSE	0	1	TRUE	yes	no	no	TRUE
ENST00000588870.1	TUBG2	D30	D4	protein_coding	retained_intron	8.85521509600326	8.70739124699004	9.06380777544216	1.29820159946084	NA	1	0.999994	TRUE	NA	NA	NA	TRUE
ENST00000342992.11	TTN	D30	D4	protein_coding	protein_coding	425.504394132045	1205.20741389373	17.2619202215923	4.07807357445427	FALSE	0	1	TRUE	yes	no	yes	TRUE
ENST00000412264.1	TTN	D30	D4	protein_coding	protein_coding	425.504394132045	1205.20741389373	17.2619202215923	4.15427123444535	NA	0	0.0298153	FALSE	NA	NA	NA	TRUE
ENST00000414766.5	TTN	D30	D4	protein_coding	protein_coding	425.504394132045	1205.20741389373	17.2619202215923	55.2231710225595	FALSE	0	0.999979	TRUE	yes	no	yes	TRUE
ENST00000589042.5	TTN	D30	D4	protein_coding	protein_coding	425.504394132045	1205.20741389373	17.2619202215923	4.34033992730433	FALSE	0	0.873536	TRUE	yes	no	yes	TRUE
ENST00000591111.5	TTN	D30	D4	protein_coding	protein_coding	425.504394132045	1205.20741389373	17.2619202215923	158.040614831842	FALSE	0	1	TRUE	yes	no	yes	TRUE
ENST00000436668.5	TTLL4	D30	D4	protein_coding	protein_coding	24.7231212764379	7.18048011044733	29.8970908162162	1.27393667225395	NA	0	0.397213	FALSE	NA	NA	NA	NA
ENST00000486672.5	TTC21B	D30	D4	protein_coding	retained_intron	23.9996169670092	26.0273019032444	22.3314460304851	0.902259986787673	NA	0	NA	NA	NA	NA	NA	TRUE
ENST00000582679.1	TSPOAP1	D30	D4	protein_coding	protein_coding	7.10882383669869	9.19136019988373	9.01112760751231	1.40703202427415	NA	0	0.417057	FALSE	NA	NA	NA	FALSE
ENST00000612930.1	TSKU	D30	D4	protein_coding	protein_coding	5.14753501501679	3.99687322885055	6.63897825118077	0.440964553836048	FALSE	0	1	TRUE	yes	yes	no	TRUE
ENST00000372383.9	TSC22D3	D30	D4	protein_coding	protein_coding	15.9689185998296	30.5589224611685	16.3512687686647	2.2272876867548	FALSE	1	0.999202	TRUE	yes	no	no	TRUE
ENST00000486554.1	TSC22D3	D30	D4	protein_coding	protein_coding	15.9689185998296	30.5589224611685	16.3512687686647	1.68891520299334	NA	1	0.0286582	FALSE	NA	NA	NA	TRUE
ENST00000317459.11	TRPT1	D30	D4	protein_coding	protein_coding	24.9048304758068	30.7645751603872	19.766949000468	2.23584883287066	FALSE	1	NA	NA	no	no	no	TRUE
ENST00000601347.1	TRPM4	D30	D4	protein_coding	processed_transcript	6.43335346540869	13.9957929369794	2.54551023128221	1.18146565237098	NA	0	0.831687	TRUE	NA	NA	NA	TRUE
ENST00000532937.1	TRMT44	D30	D4	protein_coding	retained_intron	7.07481122358102	6.43406711124381	8.35298229962466	1.15269781345912	NA	0	0.0224484	FALSE	NA	NA	NA	TRUE
ENST00000282369.7	TRIM36	D30	D4	protein_coding	protein_coding	9.6602099304949	6.66282636413218	7.7408097526538	0.622685223701825	FALSE	0	1	TRUE	yes	no	no	TRUE
ENST00000513154.6	TRIM36	D30	D4	protein_coding	protein_coding	9.6602099304949	6.66282636413218	7.7408097526538	2.96459747725867	FALSE	0	1	TRUE	yes	no	no	TRUE
ENST00000418467.4	TRDN-AS1	D30	D4	lncRNA	lncRNA	18.9343246092234	41.2172342291666	12.3528479034736	1.44991437861949	NA	0	0.0344017	FALSE	NA	NA	NA	TRUE
ENST00000427828.6	TRDN-AS1	D30	D4	lncRNA	lncRNA	18.9343246092234	41.2172342291666	12.3528479034736	1.31123125135841	NA	1	0.0379597	FALSE	NA	NA	NA	TRUE
ENST00000587049.6	TRDN-AS1	D30	D4	lncRNA	lncRNA	18.9343246092234	41.2172342291666	12.3528479034736	6.24219416278411	NA	0	0.0528797	FALSE	NA	NA	NA	TRUE
ENST00000589182.5	TRDN-AS1	D30	D4	lncRNA	lncRNA	18.9343246092234	41.2172342291666	12.3528479034736	0.807866044270946	NA	0	0.0690166	FALSE	NA	NA	NA	TRUE
ENST00000610906.4	TRDN-AS1	D30	D4	lncRNA	lncRNA	18.9343246092234	41.2172342291666	12.3528479034736	1.18337854354994	NA	0	0.0215646	FALSE	NA	NA	NA	TRUE
ENST00000615864.1	TRDN-AS1	D30	D4	lncRNA	lncRNA	18.9343246092234	41.2172342291666	12.3528479034736	0.475955502074334	NA	0	0.00322624	FALSE	NA	NA	NA	TRUE
ENST00000619147.4	TRDN-AS1	D30	D4	lncRNA	lncRNA	18.9343246092234	41.2172342291666	12.3528479034736	2.92194005014258	NA	0	0.00923298	FALSE	NA	NA	NA	TRUE
ENST00000670687.2	TRDN-AS1	D30	D4	lncRNA	lncRNA	18.9343246092234	41.2172342291666	12.3528479034736	1.18027580004662	NA	0	0.0347955	FALSE	NA	NA	NA	TRUE
ENST00000334268.9	TRDN	D30	D4	protein_coding	protein_coding	173.164088389261	178.867399328031	42.0909775248559	7.84798904902978	FALSE	0	1	TRUE	yes	no	yes	TRUE
ENST00000628709.2	TRDN	D30	D4	protein_coding	protein_coding	173.164088389261	178.867399328031	42.0909775248559	2.18929846021193	FALSE	0	0.999978	TRUE	yes	no	yes	TRUE
ENST00000504243.5	TRAPPC13	D30	D4	protein_coding	nonsense_mediated_decay	23.5700578651259	21.6732184068726	20.2542822160003	0.284168295761555	NA	0	0.0684418	FALSE	NA	NA	NA	TRUE
ENST00000505553.5	TRAPPC13	D30	D4	protein_coding	protein_coding	23.5700578651259	21.6732184068726	20.2542822160003	6.17183265818749	FALSE	0	1	TRUE	yes	no	no	TRUE
ENST00000340026.10	TRAF3IP2	D30	D4	protein_coding	protein_coding	13.6704548763398	9.55616470215812	7.90915871828165	0.700828283737096	FALSE	0	1	TRUE	yes	no	yes	TRUE
ENST00000651359.1	TRAF3IP2	D30	D4	protein_coding	protein_coding	13.6704548763398	9.55616470215812	7.90915871828165	0.212149581120631	NA	0	0.0644296	FALSE	NA	NA	NA	TRUE
ENST00000456380.5	TRA2B	D30	D4	protein_coding	nonsense_mediated_decay	180.656518240876	115.824241443054	161.624711414287	60.1321777232612	TRUE	0	0.995013	TRUE	no	no	no	TRUE
ENST00000480461.1	TRA2B	D30	D4	protein_coding	retained_intron	180.656518240876	115.824241443054	161.624711414287	9.05770833793565	NA	0	0.00953568	FALSE	NA	NA	NA	TRUE
ENST00000588032.6	TPM4	D30	D4	protein_coding	nonsense_mediated_decay	299.536469736907	207.445202160861	181.006598255848	70.5610767891014	NA	0	NA	NA	NA	NA	NA	TRUE
ENST00000643579.2	TPM4	D30	D4	protein_coding	protein_coding	299.536469736907	207.445202160861	181.006598255848	170.517977735732	FALSE	1	NA	NA	no	no	no	TRUE
ENST00000471212.5	TPM2	D30	D4	protein_coding	retained_intron	180.459492177539	316.201466348821	155.029727941195	8.90513072982536	NA	2	0.999999	TRUE	NA	NA	NA	TRUE
ENST00000643485.1	TPM2	D30	D4	protein_coding	processed_transcript	180.459492177539	316.201466348821	155.029727941195	24.3348875846402	NA	0	0.993133	TRUE	NA	NA	NA	TRUE
ENST00000644325.1	TPM2	D30	D4	protein_coding	protein_coding	180.459492177539	316.201466348821	155.029727941195	3.47238513787049	NA	0	0.16513	FALSE	NA	NA	NA	TRUE
ENST00000647435.1	TPM2	D30	D4	protein_coding	protein_coding	180.459492177539	316.201466348821	155.029727941195	17.8033010954913	FALSE	0	0.999999	TRUE	yes	no	yes	TRUE
ENST00000288398.10	TPM1	D30	D4	protein_coding	protein_coding	1095.73445462051	3217.21537604566	304.725972201659	2.90001341750981	FALSE	0	0.999999	TRUE	yes	no	yes	TRUE
ENST00000403994.9	TPM1	D30	D4	protein_coding	protein_coding	1095.73445462051	3217.21537604566	304.725972201659	250.668267445957	FALSE	0	0.999999	TRUE	yes	no	yes	TRUE
ENST00000558910.3	TPM1	D30	D4	protein_coding	protein_coding	1095.73445462051	3217.21537604566	304.725972201659	23.8051463757092	FALSE	0	0.999983	TRUE	yes	no	yes	TRUE
ENST00000559281.6	TPM1	D30	D4	protein_coding	protein_coding	1095.73445462051	3217.21537604566	304.725972201659	79.6007561279501	FALSE	0	0.999984	TRUE	yes	no	yes	TRUE
ENST00000559556.5	TPM1	D30	D4	protein_coding	protein_coding	1095.73445462051	3217.21537604566	304.725972201659	233.375999930595	FALSE	0	0.999998	TRUE	yes	no	yes	TRUE
ENST00000560131.1	TPM1	D30	D4	protein_coding	retained_intron	1095.73445462051	3217.21537604566	304.725972201659	27.8812292502092	NA	0	0.467028	FALSE	NA	NA	NA	TRUE
ENST00000560959.5	TPM1	D30	D4	protein_coding	protein_coding	1095.73445462051	3217.21537604566	304.725972201659	18.2135817173123	FALSE	0	0.999997	TRUE	yes	no	yes	TRUE
ENST00000651344.1	TPM1	D30	D4	protein_coding	retained_intron	1095.73445462051	3217.21537604566	304.725972201659	7.44206681436269	NA	1	0.998214	TRUE	NA	NA	NA	TRUE
ENST00000368402.9	TPD52L1	D30	D4	protein_coding	protein_coding	16.5155965131723	30.6022371060618	4.26485409815829	1.65075423410284	FALSE	0	0.836107	TRUE	yes	no	yes	TRUE
ENST00000571678.1	TPD52L1	D30	D4	protein_coding	retained_intron	16.5155965131723	30.6022371060618	4.26485409815829	1.19331899261688	NA	0	0.084758	FALSE	NA	NA	NA	TRUE
ENST00000263801.7	TP53BP1	D30	D4	protein_coding	protein_coding	67.3535369413782	55.7657535358213	102.583839047084	0.791401254990783	FALSE	0	1	TRUE	yes	no	yes	NA
ENST00000382039.7	TP53BP1	D30	D4	protein_coding	protein_coding	67.3535369413782	55.7657535358213	102.583839047084	5.43523775224318	FALSE	0	1	TRUE	yes	no	yes	NA
ENST00000382044.9	TP53BP1	D30	D4	protein_coding	protein_coding	67.3535369413782	55.7657535358213	102.583839047084	11.6187100673249	FALSE	0	1	TRUE	yes	no	yes	NA
ENST00000480860.1	TP53BP1	D30	D4	protein_coding	retained_intron	67.3535369413782	55.7657535358213	102.583839047084	1.01904000753802	NA	0	0.0473302	FALSE	NA	NA	NA	NA
ENST00000439512.5	TOM1	D30	D4	protein_coding	nonsense_mediated_decay	10.8608416828298	17.0638653532655	8.16677881469056	1.49017660084184	TRUE	0	NA	NA	no	no	no	TRUE
ENST00000301923.13	TNRC6B	D30	D4	protein_coding	protein_coding	30.9032095514251	35.2092526456846	31.7758809363681	0.438368579580626	FALSE	0	1	TRUE	yes	no	yes	TRUE
ENST00000446273.1	TNRC6B	D30	D4	protein_coding	protein_coding	30.9032095514251	35.2092526456846	31.7758809363681	5.91878119705951	NA	0	1	TRUE	NA	NA	NA	TRUE
ENST00000489500.1	TNRC6B	D30	D4	protein_coding	retained_intron	30.9032095514251	35.2092526456846	31.7758809363681	2.48262543826419	NA	0	0.0151163	FALSE	NA	NA	NA	TRUE
ENST00000236918.11	TNNT2	D30	D4	protein_coding	protein_coding	820.662206449158	2769.55914996287	4.74082913123321	219.108838782911	FALSE	0	0.999999	TRUE	yes	no	yes	TRUE
ENST00000367318.10	TNNT2	D30	D4	protein_coding	protein_coding	820.662206449158	2769.55914996287	4.74082913123321	87.2568638875314	FALSE	0	0.999998	TRUE	yes	no	yes	TRUE
ENST00000367322.6	TNNT2	D30	D4	protein_coding	protein_coding	820.662206449158	2769.55914996287	4.74082913123321	32.2330212567645	FALSE	0	0.999998	TRUE	yes	no	yes	TRUE
ENST00000494095.5	TNNT2	D30	D4	protein_coding	retained_intron	820.662206449158	2769.55914996287	4.74082913123321	12.2744116905345	NA	1	0.464893	FALSE	NA	NA	NA	TRUE
ENST00000503459.1	TNNT2	D30	D4	protein_coding	retained_intron	820.662206449158	2769.55914996287	4.74082913123321	7.3818581242705	NA	0	0.467912	FALSE	NA	NA	NA	TRUE
ENST00000585806.5	TNNI3	D30	D4	protein_coding	retained_intron	98.3600135243464	242.43024324906	30.7406052877843	7.26443987709182	NA	0	0.0585539	FALSE	NA	NA	NA	TRUE
ENST00000588882.1	TNNI3	D30	D4	protein_coding	protein_coding	98.3600135243464	242.43024324906	30.7406052877843	20.4649377602258	FALSE	0	0.991995	TRUE	yes	no	no	TRUE
ENST00000284483.12	TNIK	D30	D4	protein_coding	protein_coding	47.2149349199659	33.5561368029491	35.3834453377893	1.42285691435037	FALSE	0	1	TRUE	yes	no	yes	FALSE
ENST00000470834.5	TNIK	D30	D4	protein_coding	protein_coding	47.2149349199659	33.5561368029491	35.3834453377893	7.98711720410726	FALSE	0	1	TRUE	yes	no	yes	FALSE
ENST00000463427.5	TMEM87B	D30	D4	protein_coding	processed_transcript	15.4477892567365	16.1164646494527	15.4281047861358	3.35997713892291	NA	0	0.99455	TRUE	NA	NA	NA	TRUE
ENST00000650799.1	TMEM87B	D30	D4	protein_coding	protein_coding	15.4477892567365	16.1164646494527	15.4281047861358	0.94387367934416	NA	0	1	TRUE	NA	NA	NA	TRUE
ENST00000372025.5	TMEM69	D30	D4	protein_coding	protein_coding	27.5990400852335	18.2351016307354	27.0818611632445	25.6934443472543	FALSE	0	NA	NA	no	no	no	TRUE
ENST00000496366.1	TMEM69	D30	D4	protein_coding	processed_transcript	27.5990400852335	18.2351016307354	27.0818611632445	1.90559573797918	NA	0	NA	NA	NA	NA	NA	TRUE
ENST00000442441.5	TMEM50B	D30	D4	protein_coding	nonsense_mediated_decay	14.608866674221	25.1211220726687	16.240497452762	1.15878716499114	TRUE	0	0.908533	TRUE	yes	no	no	TRUE
ENST00000542230.7	TMEM50B	D30	D4	protein_coding	protein_coding	14.608866674221	25.1211220726687	16.240497452762	6.61312158395593	FALSE	1	0.913935	TRUE	yes	no	no	TRUE
ENST00000409883.7	TMEM237	D30	D4	protein_coding	protein_coding	30.2980473037026	19.5271740049028	36.2560810878413	0.701645273995709	FALSE	0	NA	NA	no	no	no	NA
ENST00000544065.5	TMEM132A	D30	D4	protein_coding	protein_coding	25.7806484305774	23.5716779541887	33.183742635409	1.65808427140008	NA	0	0.307115	FALSE	NA	NA	NA	TRUE
ENST00000432959.1	TMEM127	D30	D4	protein_coding	protein_coding	18.4515951507619	22.7002927787172	18.5102831025126	1.69801609789157	FALSE	0	0.998734	TRUE	yes	no	no	TRUE
ENST00000481238.1	TMED4	D30	D4	protein_coding	protein_coding	60.8464008015669	55.1231967409092	72.7749262367909	7.27706321750998	FALSE	0	0.985329	TRUE	yes	yes	no	TRUE
ENST00000649783.1	TJP2	D30	D4	protein_coding	processed_transcript	44.4950167515903	39.3920403850129	7.56588516962517	2.2824299135502	NA	2	1	TRUE	NA	NA	NA	TRUE
ENST00000356107.11	TJP1	D30	D4	protein_coding	protein_coding	93.3040800747554	107.612974130724	65.6998590739601	5.36519820381137	FALSE	0	1	TRUE	yes	no	yes	TRUE
ENST00000400007.8	TJP1	D30	D4	protein_coding	protein_coding	93.3040800747554	107.612974130724	65.6998590739601	3.74604754610349	NA	0	0.067413	FALSE	NA	NA	NA	TRUE
ENST00000400011.6	TJP1	D30	D4	protein_coding	protein_coding	93.3040800747554	107.612974130724	65.6998590739601	20.8625256600696	FALSE	0	1	TRUE	yes	no	yes	TRUE
ENST00000485381.1	TJP1	D30	D4	protein_coding	retained_intron	93.3040800747554	107.612974130724	65.6998590739601	1.16509136061961	NA	0	0.285265	FALSE	NA	NA	NA	TRUE
ENST00000561307.1	TJP1	D30	D4	protein_coding	retained_intron	93.3040800747554	107.612974130724	65.6998590739601	2.46154402757652	NA	0	0.049181	FALSE	NA	NA	NA	TRUE
ENST00000372454.6	TJAP1	D30	D4	protein_coding	protein_coding	16.3723441983607	6.55520424037857	19.1055730989188	1.92677964994788	NA	0	0.0451964	FALSE	NA	NA	NA	TRUE
ENST00000459851.5	TJAP1	D30	D4	protein_coding	processed_transcript	16.3723441983607	6.55520424037857	19.1055730989188	5.71696791859004	NA	0	0.0819889	FALSE	NA	NA	NA	TRUE
ENST00000612912.4	TJAP1	D30	D4	protein_coding	protein_coding	16.3723441983607	6.55520424037857	19.1055730989188	0.46557666858833	TRUE	1	0.999956	TRUE	no	no	yes	TRUE
ENST00000352327.5	THYN1	D30	D4	protein_coding	protein_coding	59.9148391204731	44.9227941779646	40.6624583364643	15.3899278347194	FALSE	1	0.7118	TRUE	yes	no	yes	TRUE
ENST00000392595.6	THYN1	D30	D4	protein_coding	protein_coding	59.9148391204731	44.9227941779646	40.6624583364643	20.9094814349303	FALSE	0	0.999292	TRUE	yes	no	yes	TRUE
ENST00000511062.5	THOC3	D30	D4	protein_coding	nonsense_mediated_decay	51.9880302872417	25.8414627317935	54.5275378488281	7.68778558145158	NA	1	0.207931	FALSE	NA	NA	NA	TRUE
ENST00000261600.11	THOC1	D30	D4	protein_coding	protein_coding	95.8218482342793	64.9490318165019	125.387171930557	31.0542739725699	FALSE	0	1	TRUE	yes	no	yes	NA
ENST00000578224.5	THOC1	D30	D4	protein_coding	retained_intron	95.8218482342793	64.9490318165019	125.387171930557	12.7864129200567	NA	0	0.192671	FALSE	NA	NA	NA	NA
ENST00000581576.1	THOC1	D30	D4	protein_coding	retained_intron	95.8218482342793	64.9490318165019	125.387171930557	3.78326780320335	NA	1	0.0103931	FALSE	NA	NA	NA	NA
ENST00000583228.5	THOC1	D30	D4	protein_coding	retained_intron	95.8218482342793	64.9490318165019	125.387171930557	7.80884420307853	NA	1	0.999998	TRUE	NA	NA	NA	NA
ENST00000584470.5	THOC1	D30	D4	protein_coding	retained_intron	95.8218482342793	64.9490318165019	125.387171930557	1.90639070076201	NA	1	0.999998	TRUE	NA	NA	NA	NA
ENST00000452284.1	THAP7-AS1	D30	D4	lncRNA	lncRNA	1.62547634195294	1.55109467181673	2.22156102070273	0.299125255685068	NA	0	0.561326	TRUE	NA	NA	NA	TRUE
ENST00000392365.5	TFPI	D30	D4	protein_coding	protein_coding	25.4715471104982	33.7300110985671	70.1231208991009	2.92802348857878	FALSE	0	0.996753	TRUE	yes	yes	no	TRUE
ENST00000435414.5	TFPI	D30	D4	protein_coding	protein_coding	25.4715471104982	33.7300110985671	70.1231208991009	1.50107210957162	NA	0	0.391268	FALSE	NA	NA	NA	TRUE
ENST00000504042.5	TET2	D30	D4	protein_coding	processed_transcript	15.3060507036165	44.7659288563273	8.30259850950506	0.707724011861098	NA	0	NA	NA	NA	NA	NA	NA
ENST00000569744.1	TELO2	D30	D4	protein_coding	retained_intron	3.31581847809482	2.23789398413881	3.44560227621702	0.151127074993246	NA	0	0.0425627	FALSE	NA	NA	NA	TRUE
ENST00000639578.3	TEAD3	D30	D4	protein_coding	protein_coding	10.6281057512702	17.8709678368095	5.76052999854245	1.54851327677122	FALSE	0	1	TRUE	yes	no	no	FALSE
ENST00000296702.9	TCERG1	D30	D4	protein_coding	protein_coding	149.706032671246	108.658648107235	150.728279827534	2.99833303050687	FALSE	0	1	TRUE	yes	no	yes	TRUE
ENST00000394421.7	TCERG1	D30	D4	protein_coding	protein_coding	149.706032671246	108.658648107235	150.728279827534	60.3303782925065	FALSE	0	1	TRUE	yes	no	yes	TRUE
ENST00000509810.5	TCERG1	D30	D4	protein_coding	retained_intron	149.706032671246	108.658648107235	150.728279827534	19.510554793692	NA	0	0.0625562	FALSE	NA	NA	NA	TRUE
ENST00000407597.7	TBL1X	D30	D4	protein_coding	protein_coding	15.2430347989969	9.3260494532679	23.0276790074418	4.29349772811144	FALSE	0	1	TRUE	yes	no	yes	NA
ENST00000356834.7	TBC1D9B	D30	D4	protein_coding	protein_coding	28.7862952538951	22.4955214183853	28.2612700513681	1.93884786899725	FALSE	0	1	TRUE	yes	no	yes	TRUE
ENST00000409318.2	TBC1D8	D30	D4	protein_coding	protein_coding	15.0747590671232	16.9433205425666	9.7137713469391	7.42504374432778	FALSE	0	1	TRUE	yes	no	yes	TRUE
ENST00000377636.8	TBC1D4	D30	D4	protein_coding	protein_coding	31.4791695442778	46.6565119924537	12.986043804669	0.630041102771021	FALSE	0	1	TRUE	yes	no	yes	TRUE
ENST00000431480.6	TBC1D4	D30	D4	protein_coding	protein_coding	31.4791695442778	46.6565119924537	12.986043804669	6.06155437303225	FALSE	0	1	TRUE	yes	no	yes	TRUE
ENST00000344949.9	TBC1D23	D30	D4	protein_coding	protein_coding	28.4228088924948	23.964199375606	17.6547477281027	13.53985938813	FALSE	0	1	TRUE	yes	no	no	FALSE
ENST00000455532.5	TASP1	D30	D4	protein_coding	protein_coding	13.0195978793777	11.267402400561	15.165618116956	3.68280865744462	FALSE	0	0.556903	TRUE	yes	no	no	TRUE
ENST00000493960.6	TASOR	D30	D4	protein_coding	protein_coding	45.6165114974284	48.622466370336	37.4935422597892	11.1280790206855	FALSE	0	1	TRUE	yes	no	yes	NA
ENST00000683822.1	TASOR	D30	D4	protein_coding	protein_coding	45.6165114974284	48.622466370336	37.4935422597892	9.49835520435657	FALSE	0	1	TRUE	yes	no	yes	NA
ENST00000392951.9	TAGLN	D30	D4	protein_coding	protein_coding	92.4417260309073	209.3106736867	14.2701226791569	6.18912892691257	FALSE	0	0.954971	TRUE	yes	no	yes	NA
ENST00000685235.1	TAF2	D30	D4	protein_coding	protein_coding	32.6423085517345	25.4133806593658	38.3189495949361	2.17182021648468	FALSE	0	1	TRUE	no	no	yes	NA
ENST00000482544.5	TAF1	D30	D4	protein_coding	processed_transcript	31.3140193211352	22.6530055997754	36.1107186928261	2.21556849165374	NA	0	0.999885	TRUE	NA	NA	NA	NA
ENST00000358010.5	TACC2	D30	D4	protein_coding	protein_coding	24.6478892187289	24.3342962791185	23.0877560984031	1.05522233784494	FALSE	2	NA	NA	no	no	no	NA
ENST00000508411.1	TACC2	D30	D4	protein_coding	protein_coding	24.6478892187289	24.3342962791185	23.0877560984031	0.557304674487317	FALSE	0	NA	NA	no	no	no	NA
ENST00000389960.8	SYTL2	D30	D4	protein_coding	protein_coding	6.92086751987404	13.943522416973	2.70606496335861	0.166006679878667	FALSE	2	NA	NA	no	no	no	FALSE
ENST00000532221.5	SYTL2	D30	D4	protein_coding	protein_coding	6.92086751987404	13.943522416973	2.70606496335861	0.578323615148359	NA	0	0.0256964	FALSE	NA	NA	NA	FALSE
ENST00000619976.1	SYNRG	D30	D4	protein_coding	processed_transcript	17.2869948177093	16.0370367632993	19.2812478605027	3.49022446874765	NA	0	1	TRUE	NA	NA	NA	TRUE
ENST00000620424.1	SYNRG	D30	D4	protein_coding	protein_coding	17.2869948177093	16.0370367632993	19.2812478605027	2.82938326537397	NA	0	0.148932	FALSE	NA	NA	NA	TRUE
ENST00000344113.8	SYNE2	D30	D4	protein_coding	protein_coding	54.1152215771608	73.8973184233346	47.8873244450204	17.4600283947123	FALSE	0	1	TRUE	yes	no	yes	FALSE
ENST00000358025.7	SYNE2	D30	D4	protein_coding	protein_coding	54.1152215771608	73.8973184233346	47.8873244450204	1.64656379461929	FALSE	0	1	TRUE	yes	no	yes	FALSE
ENST00000555323.1	SYNE2	D30	D4	protein_coding	processed_transcript	54.1152215771608	73.8973184233346	47.8873244450204	1.93510336851672	NA	0	0.0325003	FALSE	NA	NA	NA	FALSE
ENST00000676542.1	SYNCRIP	D30	D4	protein_coding	protein_coding	113.170718038731	51.9558158139857	110.357423712492	18.4221376425924	FALSE	0	1	TRUE	yes	no	yes	FALSE
ENST00000678589.1	SYNCRIP	D30	D4	protein_coding	protein_coding	113.170718038731	51.9558158139857	110.357423712492	3.74310699046091	FALSE	0	1	TRUE	yes	no	yes	FALSE
ENST00000441821.5	SYN3	D30	D4	protein_coding	protein_coding	10.0140007676023	2.18973162088932	27.261458596483	2.56042254434243	NA	0	0.163739	FALSE	NA	NA	NA	TRUE
ENST00000459990.5	SYN3	D30	D4	protein_coding	processed_transcript	10.0140007676023	2.18973162088932	27.261458596483	0.492515999737238	NA	0	0.104807	FALSE	NA	NA	NA	TRUE
ENST00000342784.7	SYDE1	D30	D4	protein_coding	protein_coding	2.23674598867547	3.47430210570448	2.48429268614113	0.370857450835069	FALSE	0	1	TRUE	yes	no	yes	FALSE
ENST00000525670.5	SVIP	D30	D4	protein_coding	processed_transcript	8.27945038640672	16.7659245895477	2.64206800027574	0.416024338920975	NA	0	0.0183175	FALSE	NA	NA	NA	TRUE
ENST00000355867.9	SVIL	D30	D4	protein_coding	protein_coding	68.6311631051582	156.048684505152	32.2756525943904	10.8356286216378	FALSE	0	1	TRUE	yes	no	yes	TRUE
ENST00000375398.6	SVIL	D30	D4	protein_coding	protein_coding	68.6311631051582	156.048684505152	32.2756525943904	5.64560081186012	FALSE	0	1	TRUE	yes	no	yes	TRUE
ENST00000375400.7	SVIL	D30	D4	protein_coding	protein_coding	68.6311631051582	156.048684505152	32.2756525943904	7.02017741404054	FALSE	0	1	TRUE	yes	no	yes	TRUE
ENST00000464726.2	SVIL	D30	D4	protein_coding	retained_intron	68.6311631051582	156.048684505152	32.2756525943904	1.14010390282266	NA	0	0.10622	FALSE	NA	NA	NA	TRUE
ENST00000464984.1	SVIL	D30	D4	protein_coding	processed_transcript	68.6311631051582	156.048684505152	32.2756525943904	3.00732368455991	NA	0	0.933119	TRUE	NA	NA	NA	TRUE
ENST00000372022.6	SURF6	D30	D4	protein_coding	protein_coding	14.8501169698604	8.71839209471668	16.5281394646058	12.8465022660167	FALSE	0	NA	NA	no	no	no	TRUE
ENST00000468290.1	SURF6	D30	D4	protein_coding	processed_transcript	14.8501169698604	8.71839209471668	16.5281394646058	2.0036147038437	NA	0	NA	NA	NA	NA	NA	TRUE
ENST00000294179.8	STX5	D30	D4	protein_coding	protein_coding	11.4442550240379	13.6004446462357	9.83651460215057	5.07735082857865	FALSE	0	1	TRUE	yes	no	yes	TRUE
ENST00000488303.5	STX5	D30	D4	protein_coding	processed_transcript	11.4442550240379	13.6004446462357	9.83651460215057	1.71054437284597	NA	0	0.0788791	FALSE	NA	NA	NA	TRUE
ENST00000677401.1	STX5	D30	D4	protein_coding	retained_intron	11.4442550240379	13.6004446462357	9.83651460215057	1.17261327759829	NA	2	0.0742696	FALSE	NA	NA	NA	TRUE
ENST00000261653.10	STX2	D30	D4	protein_coding	protein_coding	20.5554499105	12.6726372069994	24.3095601411475	5.62016318748755	FALSE	0	0.999989	TRUE	yes	no	no	TRUE
ENST00000392373.7	STX2	D30	D4	protein_coding	protein_coding	20.5554499105	12.6726372069994	24.3095601411475	8.90283245979895	TRUE	0	0.999987	TRUE	yes	no	no	TRUE
ENST00000336174.12	STRADA	D30	D4	protein_coding	protein_coding	17.5876840620753	15.0001590691905	19.2022055562186	0.549455282964929	FALSE	1	NA	NA	no	no	no	NA
ENST00000434385.2	STK38L	D30	D4	protein_coding	retained_intron	46.5189691509327	67.6704317939193	23.1350244567113	2.81013223933446	NA	0	0.0283569	FALSE	NA	NA	NA	NA
ENST00000540996.5	STK38L	D30	D4	protein_coding	protein_coding	46.5189691509327	67.6704317939193	23.1350244567113	1.03923742377144	NA	0	0.0637589	FALSE	NA	NA	NA	NA
ENST00000543992.1	STK38L	D30	D4	protein_coding	retained_intron	46.5189691509327	67.6704317939193	23.1350244567113	1.28402330946463	NA	0	0.869463	TRUE	NA	NA	NA	NA
ENST00000544969.5	STK38L	D30	D4	protein_coding	protein_coding	46.5189691509327	67.6704317939193	23.1350244567113	1.0523742616956	FALSE	0	NA	NA	no	no	no	NA
ENST00000300134.8	STAT6	D30	D4	protein_coding	protein_coding	47.512216029956	44.1487672246965	47.446943187847	11.2590796846701	FALSE	0	1	TRUE	yes	no	yes	TRUE
ENST00000555222.5	STAT6	D30	D4	protein_coding	retained_intron	47.512216029956	44.1487672246965	47.446943187847	5.1294777532163	NA	2	0.998634	TRUE	NA	NA	NA	TRUE
ENST00000229390.8	SRSF9	D30	D4	protein_coding	protein_coding	99.148567129749	42.1760709494624	98.555281058904	75.5868502036551	FALSE	0	0.87132	TRUE	yes	no	no	TRUE
ENST00000546942.1	SRSF9	D30	D4	protein_coding	retained_intron	99.148567129749	42.1760709494624	98.555281058904	7.7682055234596	NA	0	0.301288	FALSE	NA	NA	NA	TRUE
ENST00000548792.1	SRSF9	D30	D4	protein_coding	retained_intron	99.148567129749	42.1760709494624	98.555281058904	5.66713635258653	NA	0	0.387056	FALSE	NA	NA	NA	TRUE
ENST00000550458.1	SRSF9	D30	D4	protein_coding	protein_coding	99.148567129749	42.1760709494624	98.555281058904	7.74232667252436	NA	0	0.0164399	FALSE	NA	NA	NA	TRUE
ENST00000556184.5	SRSF5	D30	D4	protein_coding	retained_intron	345.153676205075	379.67379483845	392.78270991239	44.6778759480042	NA	2	NA	NA	NA	NA	NA	TRUE
ENST00000556436.1	SRSF5	D30	D4	protein_coding	retained_intron	345.153676205075	379.67379483845	392.78270991239	20.5356961865692	NA	1	NA	NA	NA	NA	NA	TRUE
ENST00000557154.6	SRSF5	D30	D4	protein_coding	protein_coding	345.153676205075	379.67379483845	392.78270991239	131.855268390035	FALSE	0	NA	NA	no	no	no	TRUE
ENST00000614136.1	SRSF3	D30	D4	protein_coding	retained_intron	523.926649549343	225.595866799243	487.847730376919	9.17431371788886	NA	2	NA	NA	NA	NA	NA	NA
ENST00000620389.1	SRSF3	D30	D4	protein_coding	retained_intron	523.926649549343	225.595866799243	487.847730376919	36.3691783913434	NA	1	NA	NA	NA	NA	NA	NA
ENST00000620941.1	SRSF3	D30	D4	protein_coding	protein_coding	523.926649549343	225.595866799243	487.847730376919	174.604131967844	FALSE	0	NA	NA	no	no	no	NA
ENST00000359995.10	SRSF2	D30	D4	protein_coding	protein_coding	124.1171339674	72.0029519756466	143.094243307606	48.8887244473346	FALSE	1	0.588707	TRUE	yes	no	yes	TRUE
ENST00000392485.2	SRSF2	D30	D4	protein_coding	protein_coding	124.1171339674	72.0029519756466	143.094243307606	17.1668391137873	FALSE	3	0.89314	TRUE	yes	no	yes	TRUE
ENST00000473754.1	SRSF10	D30	D4	protein_coding	processed_transcript	223.246483925389	149.701221830273	228.734048879026	13.8282599827932	NA	1	0.20025	FALSE	NA	NA	NA	TRUE
ENST00000485292.1	SRSF10	D30	D4	protein_coding	processed_transcript	223.246483925389	149.701221830273	228.734048879026	31.6595810616649	NA	1	0.0383914	FALSE	NA	NA	NA	TRUE
ENST00000485841.5	SRSF10	D30	D4	protein_coding	retained_intron	223.246483925389	149.701221830273	228.734048879026	17.6736550737013	NA	0	0.266994	FALSE	NA	NA	NA	TRUE
ENST00000583741.1	SRSF1	D30	D4	protein_coding	nonsense_mediated_decay	201.741727667833	122.550179276622	209.034348066483	31.0009821689838	TRUE	1	0.713751	TRUE	yes	no	no	NA
ENST00000576415.5	SRRM2	D30	D4	protein_coding	protein_coding	122.250114815905	151.293225126408	114.484162179305	1.64912445910695	FALSE	0	NA	NA	no	no	no	NA
ENST00000332118.11	SRPRA	D30	D4	protein_coding	protein_coding	13.2659928569699	14.3636411484204	12.3001366393405	9.38545947472662	FALSE	0	1	TRUE	yes	no	yes	TRUE
ENST00000528744.5	SRPRA	D30	D4	protein_coding	retained_intron	13.2659928569699	14.3636411484204	12.3001366393405	2.5124848939065	NA	1	0.821991	TRUE	NA	NA	NA	TRUE
ENST00000357311.7	SRPK2	D30	D4	protein_coding	protein_coding	37.026647136171	25.7570312238522	32.0673579194665	2.15892460564277	FALSE	1	1	TRUE	yes	no	yes	NA
ENST00000333896.5	SPTBN1	D30	D4	protein_coding	protein_coding	197.909637830032	333.309425681312	138.6453594862	36.0301828454594	FALSE	0	NA	NA	no	no	no	NA
ENST00000356805.9	SPTBN1	D30	D4	protein_coding	protein_coding	197.909637830032	333.309425681312	138.6453594862	107.906418508819	FALSE	0	NA	NA	no	no	no	NA
ENST00000467371.1	SPTBN1	D30	D4	protein_coding	retained_intron	197.909637830032	333.309425681312	138.6453594862	12.6423198469204	NA	0	NA	NA	NA	NA	NA	NA
ENST00000496323.1	SPTBN1	D30	D4	protein_coding	retained_intron	197.909637830032	333.309425681312	138.6453594862	2.97410748233062	NA	0	NA	NA	NA	NA	NA	NA
ENST00000389720.4	SPTB	D30	D4	protein_coding	protein_coding	3.2689629443108	8.50039455167228	1.42765217568774	1.02051000308759	FALSE	0	1	TRUE	yes	no	yes	TRUE
ENST00000389722.7	SPTB	D30	D4	protein_coding	protein_coding	3.2689629443108	8.50039455167228	1.42765217568774	0.985724091507482	FALSE	0	1	TRUE	yes	no	yes	TRUE
ENST00000556227.1	SPTB	D30	D4	protein_coding	retained_intron	3.2689629443108	8.50039455167228	1.42765217568774	0.921265726224713	NA	0	0.903639	TRUE	NA	NA	NA	TRUE
ENST00000630866.1	SPTAN1	D30	D4	protein_coding	protein_coding	96.4977600743031	98.3651632366205	85.4623461247416	5.90895490584067	FALSE	0	1	TRUE	yes	no	yes	TRUE
ENST00000635853.1	SPTAN1	D30	D4	protein_coding	retained_intron	96.4977600743031	98.3651632366205	85.4623461247416	1.1401218009968	NA	1	1	TRUE	NA	NA	NA	TRUE
ENST00000301463.9	SPRYD3	D30	D4	protein_coding	protein_coding	2.90485255087163	5.83559816505918	1.56994877478187	2.25937867503293	FALSE	0	1	TRUE	yes	no	no	TRUE
ENST00000537540.1	SPRYD3	D30	D4	protein_coding	nonsense_mediated_decay	2.90485255087163	5.83559816505918	1.56994877478187	0.234796161185939	TRUE	0	0.774594	TRUE	no	no	no	TRUE
ENST00000504953.5	SPOCK3	D30	D4	protein_coding	protein_coding	2.10810574289651	2.48725103595856	4.66796222903227	0.632438022921455	FALSE	0	NA	NA	no	no	no	TRUE
ENST00000524141.5	SPIDR	D30	D4	protein_coding	retained_intron	42.7334802006782	34.4997379800666	33.8264226002853	4.52992783339419	NA	0	NA	NA	NA	NA	NA	TRUE
ENST00000598088.5	SPHK2	D30	D4	protein_coding	protein_coding	5.51153295661011	3.05347087310091	5.11558987534955	0.572456382927928	FALSE	0	1	TRUE	yes	no	yes	TRUE
ENST00000599033.1	SPHK2	D30	D4	protein_coding	processed_transcript	5.51153295661011	3.05347087310091	5.11558987534955	1.36875991662032	NA	0	0.0276873	FALSE	NA	NA	NA	TRUE
ENST00000343003.10	SPATA13	D30	D4	protein_coding	protein_coding	10.9602260127702	5.71967804408344	15.9689815580998	0.890393922758424	FALSE	0	1	TRUE	yes	no	yes	TRUE
ENST00000382095.8	SPATA13	D30	D4	protein_coding	protein_coding	10.9602260127702	5.71967804408344	15.9689815580998	2.10254815986632	FALSE	0	1	TRUE	yes	no	yes	TRUE
ENST00000382108.8	SPATA13	D30	D4	protein_coding	protein_coding	10.9602260127702	5.71967804408344	15.9689815580998	1.37529507695621	FALSE	0	1	TRUE	yes	no	yes	TRUE
ENST00000424834.6	SPATA13	D30	D4	protein_coding	protein_coding	10.9602260127702	5.71967804408344	15.9689815580998	0.60638425244353	FALSE	0	1	TRUE	yes	no	yes	TRUE
ENST00000439928.2	SPATA13	D30	D4	lncRNA	lncRNA	10.9602260127702	5.71967804408344	15.9689815580998	0.101459819388259	NA	0	0.0466817	FALSE	NA	NA	NA	TRUE
ENST00000462156.1	SP140L	D30	D4	protein_coding	retained_intron	2.12239585605101	3.20845511560191	1.38032800898488	0.369337744095795	NA	0	0.116076	FALSE	NA	NA	NA	TRUE
ENST00000525259.1	SOX6	D30	D4	protein_coding	processed_transcript	9.11210975173636	19.428903569641	10.282511530736	1.51387718298027	NA	0	0.0837969	FALSE	NA	NA	NA	TRUE
ENST00000528429.5	SOX6	D30	D4	protein_coding	protein_coding	9.11210975173636	19.428903569641	10.282511530736	0.633907714602807	FALSE	0	1	TRUE	yes	no	yes	TRUE
ENST00000441133.2	SOX5	D30	D4	protein_coding	protein_coding	16.1746242064095	22.909146817964	35.3736203441319	1.24158389020081	FALSE	0	0.919166	TRUE	no	no	yes	TRUE
ENST00000446891.7	SOX5	D30	D4	protein_coding	protein_coding	16.1746242064095	22.909146817964	35.3736203441319	4.26261137625382	NA	0	0.0223149	FALSE	NA	NA	NA	TRUE
ENST00000367204.6	SOX13	D30	D4	protein_coding	protein_coding	11.3192068236982	3.92513017607714	11.4712166147554	2.6717779649279	FALSE	0	1	TRUE	yes	no	yes	TRUE
ENST00000528591.5	SOX13	D30	D4	protein_coding	protein_coding	11.3192068236982	3.92513017607714	11.4712166147554	1.45879432602393	NA	0	0.26655	FALSE	NA	NA	NA	TRUE
ENST00000618875.4	SOX13	D30	D4	protein_coding	protein_coding	11.3192068236982	3.92513017607714	11.4712166147554	4.93361949708185	FALSE	0	1	TRUE	yes	no	yes	TRUE
ENST00000464975.5	SORBS2	D30	D4	protein_coding	processed_transcript	168.767803349228	463.640487993067	5.39392319284952	10.8269432099854	NA	0	0.0227317	FALSE	NA	NA	NA	TRUE
ENST00000493709.5	SORBS2	D30	D4	protein_coding	processed_transcript	168.767803349228	463.640487993067	5.39392319284952	17.5068513896281	NA	0	0.0164682	FALSE	NA	NA	NA	TRUE
ENST00000354106.7	SORBS1	D30	D4	protein_coding	protein_coding	28.5206048402255	34.8026305758726	12.4187161913845	0.391172248303069	FALSE	0	NA	NA	no	no	no	TRUE
ENST00000371227.8	SORBS1	D30	D4	protein_coding	protein_coding	28.5206048402255	34.8026305758726	12.4187161913845	1.02705172544378	FALSE	0	1	TRUE	yes	no	yes	TRUE
ENST00000371241.5	SORBS1	D30	D4	protein_coding	protein_coding	28.5206048402255	34.8026305758726	12.4187161913845	5.04183823423329	FALSE	0	1	TRUE	yes	no	yes	TRUE
ENST00000371249.6	SORBS1	D30	D4	protein_coding	protein_coding	28.5206048402255	34.8026305758726	12.4187161913845	9.55738915025564	FALSE	0	1	TRUE	yes	no	yes	TRUE
ENST00000634504.1	SORBS1	D30	D4	protein_coding	protein_coding	28.5206048402255	34.8026305758726	12.4187161913845	1.32063104748141	NA	0	1	TRUE	NA	NA	NA	TRUE
ENST00000649575.1	SORBS1	D30	D4	protein_coding	protein_coding	28.5206048402255	34.8026305758726	12.4187161913845	0.526703241162128	FALSE	0	0.999999	TRUE	yes	no	yes	TRUE
ENST00000279034.10	SOGA1	D30	D4	protein_coding	protein_coding	5.74148428695543	5.14735473654071	6.18872624035344	1.52496234953114	FALSE	0	1	TRUE	yes	no	yes	TRUE
ENST00000367054.6	SOD2	D30	D4	protein_coding	protein_coding	67.5432915557954	100.060342337169	40.859008239106	0.664791604156537	FALSE	0	0.992324	TRUE	yes	no	no	TRUE
ENST00000546260.5	SOD2	D30	D4	protein_coding	nonsense_mediated_decay	67.5432915557954	100.060342337169	40.859008239106	16.4194154694675	TRUE	1	0.606693	TRUE	yes	no	no	TRUE
ENST00000390687.9	SNRPN	D30	D4	protein_coding	protein_coding	326.980129563258	171.202244182722	163.873646957898	209.102721484503	FALSE	0	0.997574	TRUE	yes	no	yes	FALSE
ENST00000400097.5	SNRPN	D30	D4	protein_coding	protein_coding	326.980129563258	171.202244182722	163.873646957898	34.9058208521134	FALSE	0	0.99719	TRUE	yes	no	yes	FALSE
ENST00000401730.5	SNRNP70	D30	D4	protein_coding	nonsense_mediated_decay	142.129306634439	115.105726004585	124.056530595959	4.73325955224772	TRUE	0	0.592369	TRUE	yes	no	yes	NA
ENST00000323853.10	SNRNP200	D30	D4	protein_coding	protein_coding	94.5897941553126	54.2212611308988	104.128520990239	29.3839792804756	FALSE	0	1	TRUE	yes	no	yes	TRUE
ENST00000652267.1	SNRNP200	D30	D4	protein_coding	protein_coding	94.5897941553126	54.2212611308988	104.128520990239	44.4557879145997	FALSE	0	1	TRUE	yes	no	yes	TRUE
ENST00000686755.1	SNHG16	D30	D4	lncRNA	lncRNA	269.417046728151	117.555664048236	355.844300737113	112.067564335993	NA	0	0.0362878	FALSE	NA	NA	NA	FALSE
ENST00000495883.1	SNAP25	D30	D4	protein_coding	retained_intron	6.42530083761832	18.9768363886811	3.79446920095283	0.371960544025268	NA	0	0.128905	FALSE	NA	NA	NA	NA
ENST00000690099.1	SNAP25	D30	D4	protein_coding	retained_intron	6.42530083761832	18.9768363886811	3.79446920095283	2.89953566498283	NA	0	0.272445	FALSE	NA	NA	NA	NA
ENST00000690766.1	SNAP25	D30	D4	protein_coding	retained_intron	6.42530083761832	18.9768363886811	3.79446920095283	0.22193349612677	NA	1	0.470458	FALSE	NA	NA	NA	NA
ENST00000464398.1	SMYD3	D30	D4	protein_coding	processed_transcript	49.2872179127387	41.1554510197838	59.7129070111392	1.36600653805813	NA	0	0.0468855	FALSE	NA	NA	NA	TRUE
ENST00000482592.5	SMYD3	D30	D4	protein_coding	processed_transcript	49.2872179127387	41.1554510197838	59.7129070111392	3.81841514439965	NA	0	0.0598807	FALSE	NA	NA	NA	TRUE
ENST00000483072.5	SMYD3	D30	D4	protein_coding	processed_transcript	49.2872179127387	41.1554510197838	59.7129070111392	9.56746250319844	NA	0	0.117769	FALSE	NA	NA	NA	TRUE
ENST00000491455.5	SMYD2	D30	D4	protein_coding	processed_transcript	25.5816756312189	47.2855045037132	22.5934253647203	0.545417262730125	NA	1	1	TRUE	NA	NA	NA	NA
ENST00000580072.5	SMURF2	D30	D4	protein_coding	retained_intron	33.35759507409	34.9357824240052	30.3415741167837	1.554298051617	NA	0	NA	NA	NA	NA	NA	TRUE
ENST00000585301.1	SMURF2	D30	D4	protein_coding	protein_coding	33.35759507409	34.9357824240052	30.3415741167837	17.5787090604811	FALSE	0	NA	NA	no	no	no	TRUE
ENST00000422839.5	SMTN	D30	D4	protein_coding	protein_coding	7.98263674628999	10.2715174541843	5.27667695667657	0.0932543245198661	NA	0	0.0258487	FALSE	NA	NA	NA	TRUE
ENST00000493335.5	SMTN	D30	D4	protein_coding	retained_intron	7.98263674628999	10.2715174541843	5.27667695667657	0.901253819565862	NA	1	0.997998	TRUE	NA	NA	NA	TRUE
ENST00000446852.5	SMC6	D30	D4	protein_coding	protein_coding	136.422559327065	33.9438868418505	106.04211928994	5.7874419838412	FALSE	0	0.998683	TRUE	no	no	no	NA
ENST00000481708.1	SMC6	D30	D4	protein_coding	retained_intron	136.422559327065	33.9438868418505	106.04211928994	3.15897037928556	NA	0	0.697481	TRUE	NA	NA	NA	NA
ENST00000549209.5	SMARCC2	D30	D4	protein_coding	processed_transcript	44.6322790407712	47.1991436241524	56.1363161167289	2.45840928722688	NA	0	0.842429	TRUE	NA	NA	NA	NA
ENST00000407422.8	SMARCB1	D30	D4	protein_coding	protein_coding	87.7660216635394	57.1364242973194	74.6131329586543	43.404986027901	FALSE	0	1	TRUE	yes	no	no	TRUE
ENST00000417137.6	SMARCB1	D30	D4	protein_coding	protein_coding	87.7660216635394	57.1364242973194	74.6131329586543	19.5430367891903	NA	0	0.419871	FALSE	NA	NA	NA	TRUE
ENST00000634926.1	SMARCB1	D30	D4	protein_coding	protein_coding	87.7660216635394	57.1364242973194	74.6131329586543	2.65584336246172	NA	0	0.0423874	FALSE	NA	NA	NA	TRUE
ENST00000619054.4	SMAP1	D30	D4	protein_coding	protein_coding	25.3198180246702	20.7509256877526	25.2840515533687	7.35060246089868	FALSE	0	1	TRUE	yes	no	yes	FALSE
ENST00000335753.8	SLK	D30	D4	protein_coding	protein_coding	45.7217021387137	65.4496096286078	34.1559958219487	15.4571966671702	FALSE	0	1	TRUE	yes	no	yes	FALSE
ENST00000332839.8	SLC8A1	D30	D4	protein_coding	protein_coding	380.983294825251	1233.16870617903	3.29443293633634	81.0528109183053	FALSE	0	1	TRUE	yes	yes	no	FALSE
ENST00000405269.5	SLC8A1	D30	D4	protein_coding	protein_coding	380.983294825251	1233.16870617903	3.29443293633634	0.0946411366637043	FALSE	0	1	TRUE	yes	yes	no	FALSE
ENST00000408028.6	SLC8A1	D30	D4	protein_coding	protein_coding	380.983294825251	1233.16870617903	3.29443293633634	0.420049347372857	FALSE	0	1	TRUE	yes	yes	no	FALSE
ENST00000455476.5	SLC8A1	D30	D4	protein_coding	protein_coding	380.983294825251	1233.16870617903	3.29443293633634	23.4512960782832	NA	0	0.0407727	FALSE	NA	NA	NA	FALSE
ENST00000437266.5	SLC4A7	D30	D4	protein_coding	nonsense_mediated_decay	108.613890977817	47.2296467962724	65.2110180829247	0.613069518704806	TRUE	0	NA	NA	no	no	no	NA
ENST00000457377.5	SLC4A7	D30	D4	protein_coding	nonsense_mediated_decay	108.613890977817	47.2296467962724	65.2110180829247	3.36998994129695	TRUE	0	NA	NA	no	no	no	NA
ENST00000554059.1	SLC39A9	D30	D4	protein_coding	retained_intron	36.5760293743706	51.0792753852945	20.8144902393694	8.43107040594706	NA	0	0.149532	FALSE	NA	NA	NA	TRUE
ENST00000555245.5	SLC39A9	D30	D4	protein_coding	processed_transcript	36.5760293743706	51.0792753852945	20.8144902393694	1.52678418363919	NA	0	0.995423	TRUE	NA	NA	NA	TRUE
ENST00000556605.5	SLC39A9	D30	D4	protein_coding	protein_coding	36.5760293743706	51.0792753852945	20.8144902393694	7.68103447081427	FALSE	0	0.999724	TRUE	yes	no	no	TRUE
ENST00000557046.1	SLC39A9	D30	D4	protein_coding	protein_coding	36.5760293743706	51.0792753852945	20.8144902393694	2.08824658929399	FALSE	0	0.99999	TRUE	yes	no	no	TRUE
ENST00000533028.8	SLC35A3	D30	D4	protein_coding	protein_coding	21.091209490664	10.395283618674	45.2142730787536	1.1723574920225	FALSE	0	0.984766	TRUE	yes	no	no	NA
ENST00000638876.1	SLC35A3	D30	D4	protein_coding	nonsense_mediated_decay	21.091209490664	10.395283618674	45.2142730787536	0.598054972428752	TRUE	0	0.734906	TRUE	yes	no	no	NA
ENST00000373371.8	SLC2A8	D30	D4	protein_coding	protein_coding	4.02541593449743	3.51925088837282	3.51700824361368	0.573811912718194	FALSE	0	1	TRUE	yes	no	no	TRUE
ENST00000371755.9	SLC29A1	D30	D4	protein_coding	protein_coding	31.1415177207381	29.4948122926014	19.7232004535301	20.3873837536734	FALSE	0	1	TRUE	yes	no	no	FALSE
ENST00000393844.7	SLC29A1	D30	D4	protein_coding	protein_coding	31.1415177207381	29.4948122926014	19.7232004535301	5.26655886388048	FALSE	0	1	TRUE	yes	no	no	FALSE
ENST00000546766.5	SLC25A3	D30	D4	protein_coding	retained_intron	651.737821280641	551.715981776419	677.965812777192	20.305611173662	NA	2	0.999539	TRUE	NA	NA	NA	TRUE
ENST00000547444.1	SLC25A3	D30	D4	protein_coding	retained_intron	651.737821280641	551.715981776419	677.965812777192	13.5430374879873	NA	0	0.146706	FALSE	NA	NA	NA	TRUE
ENST00000547908.1	SLC25A3	D30	D4	protein_coding	retained_intron	651.737821280641	551.715981776419	677.965812777192	7.48348193451278	NA	1	0.199988	FALSE	NA	NA	NA	TRUE
ENST00000549338.5	SLC25A3	D30	D4	protein_coding	protein_coding	651.737821280641	551.715981776419	677.965812777192	172.648551994929	FALSE	0	0.999999	TRUE	yes	no	no	TRUE
ENST00000551917.5	SLC25A3	D30	D4	protein_coding	protein_coding	651.737821280641	551.715981776419	677.965812777192	43.1026203529789	FALSE	0	0.999998	TRUE	yes	no	no	TRUE
ENST00000493963.5	SLC25A16	D30	D4	protein_coding	nonsense_mediated_decay	7.33547053692082	14.6550278167881	5.17344774847054	1.70914335164716	NA	1	0.414703	FALSE	NA	NA	NA	TRUE
ENST00000425561.3	SLC24A1	D30	D4	protein_coding	processed_transcript	6.16207958214523	3.1980306428453	5.62363332163088	1.52965421716859	NA	1	NA	NA	NA	NA	NA	TRUE
ENST00000342228.7	SLC20A2	D30	D4	protein_coding	protein_coding	34.0832948524345	53.4925694491129	30.8383716112121	4.02679150628407	FALSE	0	1	TRUE	yes	no	no	FALSE
ENST00000520262.6	SLC20A2	D30	D4	protein_coding	protein_coding	34.0832948524345	53.4925694491129	30.8383716112121	10.3705561183349	FALSE	0	1	TRUE	yes	no	no	FALSE
ENST00000412532.6	SLC1A5	D30	D4	protein_coding	protein_coding	75.797410817436	10.300260754793	77.8640524698667	47.5446276415439	FALSE	0	1	TRUE	yes	no	no	TRUE
ENST00000542575.6	SLC1A5	D30	D4	protein_coding	protein_coding	75.797410817436	10.300260754793	77.8640524698667	22.7891937115803	FALSE	0	1	TRUE	yes	no	no	TRUE
ENST00000433363.7	SLC13A5	D30	D4	protein_coding	protein_coding	1.21119138905266	1.0961595202174	2.48846538521739	0.195226288087161	FALSE	0	1	TRUE	yes	no	no	TRUE
ENST00000574824.5	SLC13A5	D30	D4	protein_coding	retained_intron	1.21119138905266	1.0961595202174	2.48846538521739	0.469610742101898	NA	0	0.999998	TRUE	NA	NA	NA	TRUE
ENST00000677861.1	SKP2	D30	D4	protein_coding	retained_intron	32.8530782028837	22.6318300698962	38.1752449480097	2.01148244850983	NA	0	0.999992	TRUE	NA	NA	NA	TRUE
ENST00000678129.1	SKP2	D30	D4	protein_coding	processed_transcript	32.8530782028837	22.6318300698962	38.1752449480097	2.07589836935965	NA	0	0.242739	FALSE	NA	NA	NA	TRUE
ENST00000678580.1	SKP2	D30	D4	protein_coding	protein_coding	32.8530782028837	22.6318300698962	38.1752449480097	3.28324377838797	FALSE	1	0.999988	TRUE	yes	no	yes	TRUE
ENST00000679283.1	SKP2	D30	D4	protein_coding	retained_intron	32.8530782028837	22.6318300698962	38.1752449480097	1.30568166992079	NA	3	0.592681	TRUE	NA	NA	NA	TRUE
ENST00000580541.1	SKA2	D30	D4	protein_coding	protein_coding	152.204596743403	103.329862845664	125.747267207691	4.74227415762106	FALSE	0	NA	NA	no	no	no	NA
ENST00000595900.1	SIN3B	D30	D4	protein_coding	processed_transcript	19.7143749789025	19.7017807319972	19.8597142444184	5.55248192927053	NA	0	0.72004	TRUE	NA	NA	NA	NA
ENST00000275233.12	SHPRH	D30	D4	protein_coding	protein_coding	24.530338065143	25.6040125562473	27.8699913830183	1.67776586598283	FALSE	1	1	TRUE	yes	no	yes	NA
ENST00000328923.8	SHMT2	D30	D4	protein_coding	protein_coding	112.102971382066	32.2350027441059	117.737864529232	62.6501802190082	FALSE	0	1	TRUE	yes	no	no	NA
ENST00000556825.5	SHMT2	D30	D4	protein_coding	nonsense_mediated_decay	112.102971382066	32.2350027441059	117.737864529232	2.73963941690342	TRUE	0	1	TRUE	no	no	no	NA
ENST00000557529.1	SHMT2	D30	D4	protein_coding	protein_coding	112.102971382066	32.2350027441059	117.737864529232	4.57317973097306	NA	1	0.999596	TRUE	NA	NA	NA	NA
ENST00000506591.1	SH3RF2	D30	D4	protein_coding	processed_transcript	5.22124542796426	9.89839142820494	6.8485806263306	0.72422856236461	NA	0	0.00462094	FALSE	NA	NA	NA	TRUE
ENST00000355946.7	SH3PXD2A	D30	D4	protein_coding	protein_coding	11.7690428101585	22.1884322244338	5.04305458345777	1.62161330991913	FALSE	0	1	TRUE	yes	no	yes	TRUE
ENST00000692756.1	SH3PXD2A	D30	D4	protein_coding	processed_transcript	11.7690428101585	22.1884322244338	5.04305458345777	1.14109350323383	NA	0	1	TRUE	NA	NA	NA	TRUE
ENST00000459646.1	SH3BP1	D30	D4	protein_coding	retained_intron	6.11427320598073	3.8712626993568	2.60547823355394	1.51047172792362	NA	0	0.482882	FALSE	NA	NA	NA	TRUE
ENST00000268989.8	SGSM2	D30	D4	protein_coding	protein_coding	9.88522186889542	11.1916329015805	15.6167407184945	1.60125481026939	FALSE	0	1	TRUE	yes	no	yes	FALSE
ENST00000450787.1	SFI1	D30	D4	protein_coding	protein_coding	15.5305103577489	10.4434702646105	19.5849515830884	0.492149054412829	FALSE	0	NA	NA	no	no	no	NA
ENST00000409915.8	SF3B1	D30	D4	protein_coding	nonsense_mediated_decay	266.26403205077	201.910122150136	271.955750353046	15.5938000973065	TRUE	0	NA	NA	no	no	no	TRUE
ENST00000424674.1	SF3B1	D30	D4	protein_coding	protein_coding	266.26403205077	201.910122150136	271.955750353046	48.2050443601358	NA	0	NA	NA	NA	NA	NA	TRUE
ENST00000358950.4	SETMAR	D30	D4	protein_coding	protein_coding	10.8888039711128	8.19093894952499	11.8834933337531	0.838838893258759	NA	0	0.228093	FALSE	NA	NA	NA	NA
ENST00000462115.1	SETMAR	D30	D4	protein_coding	processed_transcript	10.8888039711128	8.19093894952499	11.8834933337531	0.42527258131258	NA	0	0.086225	FALSE	NA	NA	NA	NA
ENST00000407969.5	SETD5	D30	D4	protein_coding	protein_coding	209.806341121983	326.173855582225	95.2944790972892	21.0917307667251	FALSE	0	1	TRUE	yes	no	yes	TRUE
ENST00000415650.5	SETD5	D30	D4	protein_coding	nonsense_mediated_decay	209.806341121983	326.173855582225	95.2944790972892	6.23119392746598	NA	0	0.0535212	FALSE	NA	NA	NA	TRUE
ENST00000431285.5	SETD5	D30	D4	protein_coding	nonsense_mediated_decay	209.806341121983	326.173855582225	95.2944790972892	3.74267655796218	NA	0	0.325902	FALSE	NA	NA	NA	TRUE
ENST00000463180.5	SETD5	D30	D4	protein_coding	retained_intron	209.806341121983	326.173855582225	95.2944790972892	4.35289947458585	NA	0	0.0066315	FALSE	NA	NA	NA	TRUE
ENST00000479538.1	SETD5	D30	D4	protein_coding	processed_transcript	209.806341121983	326.173855582225	95.2944790972892	84.4193261916286	NA	0	0.315101	FALSE	NA	NA	NA	TRUE
ENST00000488236.5	SETD5	D30	D4	protein_coding	protein_coding	209.806341121983	326.173855582225	95.2944790972892	2.47079187270463	NA	0	0.653761	TRUE	NA	NA	NA	TRUE
ENST00000490791.5	SETD5	D30	D4	protein_coding	nonsense_mediated_decay	209.806341121983	326.173855582225	95.2944790972892	10.0018365018145	NA	0	0.144865	FALSE	NA	NA	NA	TRUE
ENST00000683262.1	SETD5	D30	D4	protein_coding	nonsense_mediated_decay	209.806341121983	326.173855582225	95.2944790972892	3.58638653275861	NA	0	0.0211987	FALSE	NA	NA	NA	TRUE
ENST00000687014.1	SETD5	D30	D4	protein_coding	retained_intron	209.806341121983	326.173855582225	95.2944790972892	2.57998835095176	NA	2	0.987231	TRUE	NA	NA	NA	TRUE
ENST00000688835.1	SETD5	D30	D4	protein_coding	retained_intron	209.806341121983	326.173855582225	95.2944790972892	2.75825103982705	NA	1	1	TRUE	NA	NA	NA	TRUE
ENST00000689167.1	SETD5	D30	D4	protein_coding	retained_intron	209.806341121983	326.173855582225	95.2944790972892	1.68311911154234	NA	3	0.53805	TRUE	NA	NA	NA	TRUE
ENST00000691299.1	SETD5	D30	D4	protein_coding	retained_intron	209.806341121983	326.173855582225	95.2944790972892	5.07471450866954	NA	1	0.0234162	FALSE	NA	NA	NA	TRUE
ENST00000691659.1	SETD5	D30	D4	protein_coding	retained_intron	209.806341121983	326.173855582225	95.2944790972892	3.61247677742104	NA	2	0.0295938	FALSE	NA	NA	NA	TRUE
ENST00000692920.1	SETD5	D30	D4	protein_coding	retained_intron	209.806341121983	326.173855582225	95.2944790972892	4.96659701793667	NA	2	0.167371	FALSE	NA	NA	NA	TRUE
ENST00000588958.6	SEPTIN9	D30	D4	protein_coding	protein_coding	190.637355614987	67.7219910056952	198.786517404048	5.33687017805295	NA	0	0.290541	FALSE	NA	NA	NA	NA
ENST00000687862.1	SEPTIN7P2	D30	D4	transcribed_unprocessed_pseudogene	processed_transcript	23.2821856945023	18.8456301477876	26.4822400456403	4.76067713864954	NA	0	NA	NA	NA	NA	NA	TRUE
ENST00000503038.1	SEPTIN7P14	D30	D4	transcribed_unprocessed_pseudogene	retained_intron	26.9897013354847	55.1614840321218	23.9011076296903	3.69278525886944	NA	0	NA	NA	NA	NA	NA	NA
ENST00000383045.7	SEPTIN5	D30	D4	protein_coding	protein_coding	21.5581560779725	55.6008536444552	2.51702698173734	3.27245252549624	FALSE	0	1	TRUE	yes	no	yes	TRUE
ENST00000264893.11	SEPTIN11	D30	D4	protein_coding	protein_coding	106.239460233007	69.7452121933297	86.7801361187908	42.8657238652414	FALSE	2	1	TRUE	yes	no	yes	TRUE
ENST00000502584.5	SEPTIN11	D30	D4	protein_coding	protein_coding	106.239460233007	69.7452121933297	86.7801361187908	3.36081195580644	FALSE	1	1	TRUE	yes	no	yes	TRUE
ENST00000513373.1	SEPTIN11	D30	D4	protein_coding	processed_transcript	106.239460233007	69.7452121933297	86.7801361187908	1.30303304196935	NA	1	0.0166269	FALSE	NA	NA	NA	TRUE
ENST00000549518.6	SENP1	D30	D4	protein_coding	protein_coding	20.15151611841	14.5587458590956	20.2750408969425	4.95783008185983	FALSE	0	1	TRUE	yes	no	yes	FALSE
ENST00000549595.5	SENP1	D30	D4	protein_coding	protein_coding	20.15151611841	14.5587458590956	20.2750408969425	8.16504943711355	FALSE	0	1	TRUE	yes	no	yes	FALSE
ENST00000601048.6	SELENOW	D30	D4	protein_coding	protein_coding	38.1612603322587	49.6851128721534	11.7585972330551	23.3290629412467	NA	0	0.123018	FALSE	NA	NA	NA	FALSE
ENST00000559198.1	SECISBP2L	D30	D4	protein_coding	retained_intron	32.6438725812962	47.3625824118953	36.0706786579393	1.83036392137246	NA	0	0.0351574	FALSE	NA	NA	NA	NA
ENST00000425851.1	SECISBP2	D30	D4	protein_coding	protein_coding	83.6910837330275	40.6995953744215	84.0620212074516	25.0403338116287	NA	0	0.261328	FALSE	NA	NA	NA	NA
ENST00000496597.1	SECISBP2	D30	D4	protein_coding	processed_transcript	83.6910837330275	40.6995953744215	84.0620212074516	2.36629552620225	NA	0	0.116525	FALSE	NA	NA	NA	NA
ENST00000348405.8	SEC31A	D30	D4	protein_coding	protein_coding	131.949990858914	153.367861069403	125.923684054927	11.4194916322357	FALSE	0	NA	NA	no	no	no	NA
ENST00000508502.5	SEC31A	D30	D4	protein_coding	protein_coding	131.949990858914	153.367861069403	125.923684054927	6.57520470857458	FALSE	0	NA	NA	no	no	no	NA
ENST00000619483.4	SEC14L2	D30	D4	protein_coding	retained_intron	3.21335584723117	2.8442104037212	6.84705637471251	0.220282944297648	NA	1	0.585727	TRUE	NA	NA	NA	NA
ENST00000264932.11	SDHA	D30	D4	protein_coding	protein_coding	76.4417596002221	124.489788051731	43.9783721258702	22.884601138991	FALSE	1	1	TRUE	yes	no	no	NA
ENST00000502379.5	SDHA	D30	D4	protein_coding	retained_intron	76.4417596002221	124.489788051731	43.9783721258702	2.24928898551041	NA	0	0.980865	TRUE	NA	NA	NA	NA
ENST00000503674.5	SDHA	D30	D4	protein_coding	retained_intron	76.4417596002221	124.489788051731	43.9783721258702	7.36844902755803	NA	0	0.979998	TRUE	NA	NA	NA	NA
ENST00000511810.5	SDHA	D30	D4	protein_coding	retained_intron	76.4417596002221	124.489788051731	43.9783721258702	2.42488337176605	NA	1	0.995429	TRUE	NA	NA	NA	NA
ENST00000514027.5	SDHA	D30	D4	protein_coding	retained_intron	76.4417596002221	124.489788051731	43.9783721258702	1.90086107653077	NA	1	1	TRUE	NA	NA	NA	NA
ENST00000531942.1	SCRIB	D30	D4	protein_coding	protein_coding	9.74904469400904	5.56502958162732	9.62025602188755	1.15141776437234	FALSE	0	NA	NA	no	no	no	TRUE
ENST00000409672.5	SCN9A	D30	D4	protein_coding	protein_coding	4.67115470872191	6.11283559313937	1.91755160094663	0.246420545843487	FALSE	0	1	TRUE	yes	no	yes	TRUE
ENST00000454569.6	SCN9A	D30	D4	protein_coding	protein_coding	4.67115470872191	6.11283559313937	1.91755160094663	1.6763338966382	FALSE	0	1	TRUE	yes	no	yes	TRUE
ENST00000646694.1	SCN9A	D30	D4	protein_coding	retained_intron	4.67115470872191	6.11283559313937	1.91755160094663	1.33361764570615	NA	0	1	TRUE	NA	NA	NA	TRUE
ENST00000476683.1	SCN5A	D30	D4	protein_coding	retained_intron	5.16040241068913	12.9540095313684	3.25844869006687	0.213679704962196	NA	0	0.0456349	FALSE	NA	NA	NA	TRUE
ENST00000254663.12	SCLY	D30	D4	protein_coding	protein_coding	17.8560232640064	6.14287133351378	15.5956981136815	2.62327183874145	FALSE	0	NA	NA	no	no	no	NA
ENST00000487197.1	SCLY	D30	D4	protein_coding	retained_intron	17.8560232640064	6.14287133351378	15.5956981136815	0.98990661901356	NA	0	NA	NA	NA	NA	NA	NA
ENST00000482804.1	SCHIP1	D30	D4	protein_coding	protein_coding	19.6288472522879	49.2840393631332	5.58574996770753	7.28387875957858	FALSE	0	0.999993	TRUE	yes	no	yes	TRUE
ENST00000475752.1	SCG5	D30	D4	protein_coding	retained_intron	8.03375312081946	13.6965477379597	11.3258020143469	2.87633355953944	NA	0	0.450723	FALSE	NA	NA	NA	TRUE
ENST00000554819.5	SCFD1	D30	D4	protein_coding	processed_transcript	72.6946118496484	59.5211968897018	75.566331168138	1.87939213107155	NA	0	NA	NA	NA	NA	NA	NA
ENST00000676817.1	SCFD1	D30	D4	protein_coding	retained_intron	72.6946118496484	59.5211968897018	75.566331168138	2.3431558905606	NA	0	NA	NA	NA	NA	NA	NA
ENST00000678006.1	SCFD1	D30	D4	protein_coding	retained_intron	72.6946118496484	59.5211968897018	75.566331168138	1.4276174191445	NA	0	NA	NA	NA	NA	NA	NA
ENST00000273908.4	SCD5	D30	D4	protein_coding	protein_coding	6.64963923441766	17.3515203542629	3.81863821462029	1.99399632630849	FALSE	0	0.995325	TRUE	no	no	no	TRUE
ENST00000319540.9	SCD5	D30	D4	protein_coding	protein_coding	6.64963923441766	17.3515203542629	3.81863821462029	4.65564290810918	FALSE	0	0.999771	TRUE	yes	no	no	TRUE
ENST00000452128.6	SCAMP4	D30	D4	protein_coding	retained_intron	6.31944535700198	5.45920328433601	5.69934761909984	0.598156116720952	NA	0	0.422425	FALSE	NA	NA	NA	TRUE
ENST00000479234.1	SCAF8	D30	D4	protein_coding	processed_transcript	38.5626769503433	34.6254358046765	38.7106417754439	1.32866408151633	NA	0	0.0165036	FALSE	NA	NA	NA	NA
ENST00000269298.10	SAT2	D30	D4	protein_coding	protein_coding	40.5676912434948	47.0940061438023	41.1558801706511	11.1661262768512	FALSE	0	NA	NA	no	no	no	TRUE
ENST00000474223.1	SAT1	D30	D4	protein_coding	retained_intron	101.660739851729	258.879106905209	56.2616326605515	6.80001332424042	NA	0	0.998287	TRUE	NA	NA	NA	NA
ENST00000537235.2	SALL2	D30	D4	protein_coding	protein_coding	44.6196165350567	14.1884709253355	34.0957882190709	34.2909216513402	FALSE	2	1	TRUE	yes	no	yes	TRUE
ENST00000546363.5	SALL2	D30	D4	protein_coding	protein_coding	44.6196165350567	14.1884709253355	34.0957882190709	0.958264059796206	NA	0	1	TRUE	NA	NA	NA	TRUE
ENST00000611430.4	SALL2	D30	D4	protein_coding	protein_coding	44.6196165350567	14.1884709253355	34.0957882190709	3.28221432250218	FALSE	0	0.999431	TRUE	no	no	yes	TRUE
ENST00000614342.1	SALL2	D30	D4	protein_coding	protein_coding	44.6196165350567	14.1884709253355	34.0957882190709	5.87219537367637	FALSE	2	1	TRUE	yes	no	yes	TRUE
ENST00000402364.1	SACS	D30	D4	protein_coding	protein_coding	27.3941254770008	29.8173771059757	40.6648584280897	1.53028451284902	FALSE	1	1	TRUE	yes	no	no	NA
ENST00000682944.1	SACS	D30	D4	protein_coding	protein_coding	27.3941254770008	29.8173771059757	40.6648584280897	0.549924940772763	FALSE	1	1	TRUE	yes	no	no	NA
ENST00000468204.2	RWDD1	D30	D4	protein_coding	protein_coding	90.096911279161	72.883783002216	86.3956848310171	52.0093767732107	NA	0	0.030253	FALSE	NA	NA	NA	TRUE
ENST00000487832.6	RWDD1	D30	D4	protein_coding	protein_coding	90.096911279161	72.883783002216	86.3956848310171	28.2705859759273	FALSE	0	0.988941	TRUE	yes	no	yes	TRUE
ENST00000394609.6	RTN4	D30	D4	protein_coding	protein_coding	165.839367157023	191.967057614213	104.233242184131	28.6701878827431	FALSE	0	0.991843	TRUE	yes	no	no	TRUE
ENST00000357802.7	RRP7BP	D30	D4	transcribed_unprocessed_pseudogene	processed_transcript	15.2834248815628	16.4744924719933	19.257092765975	5.30713755625234	NA	0	0.416857	FALSE	NA	NA	NA	TRUE
ENST00000437211.5	RRP7BP	D30	D4	transcribed_unprocessed_pseudogene	processed_transcript	15.2834248815628	16.4744924719933	19.257092765975	3.09357842083328	NA	0	0.589491	TRUE	NA	NA	NA	TRUE
ENST00000458605.6	RRP7BP	D30	D4	transcribed_unprocessed_pseudogene	processed_transcript	15.2834248815628	16.4744924719933	19.257092765975	4.53300100470659	NA	0	0.314419	FALSE	NA	NA	NA	TRUE
ENST00000491191.5	RREB1	D30	D4	protein_coding	protein_coding	26.8548238036291	24.8948973001599	37.2063228046714	1.6494251361926	NA	0	0.130294	FALSE	NA	NA	NA	NA
ENST00000543470.5	RPS6KC1	D30	D4	protein_coding	protein_coding	16.3958989093154	14.226854552359	14.85050768562	1.31618086876285	FALSE	0	1	TRUE	yes	no	yes	TRUE
ENST00000272317.11	RPS27A	D30	D4	protein_coding	protein_coding	1385.26092977407	599.804018856946	1669.17282055135	1225.77519449061	FALSE	0	0.98362	TRUE	yes	no	no	NA
ENST00000404735.1	RPS27A	D30	D4	protein_coding	protein_coding	1385.26092977407	599.804018856946	1669.17282055135	128.947241896478	FALSE	1	0.920957	TRUE	yes	no	no	NA
ENST00000372360.9	RPS24	D30	D4	protein_coding	protein_coding	3658.19544984369	2358.26071728178	4280.64424459047	2739.99595164572	FALSE	0	0.857642	TRUE	yes	no	yes	FALSE
ENST00000464716.6	RPS24	D30	D4	protein_coding	protein_coding	3658.19544984369	2358.26071728178	4280.64424459047	51.5931414715902	FALSE	0	0.742626	TRUE	yes	no	yes	FALSE
ENST00000613865.5	RPS24	D30	D4	protein_coding	protein_coding	3658.19544984369	2358.26071728178	4280.64424459047	229.413554065615	FALSE	0	0.735453	TRUE	yes	no	yes	FALSE
ENST00000645440.1	RPS24	D30	D4	protein_coding	protein_coding	3658.19544984369	2358.26071728178	4280.64424459047	171.237425043204	FALSE	0	0.771615	TRUE	yes	no	yes	FALSE
ENST00000449186.2	RPRD1B	D30	D4	protein_coding	protein_coding	23.9477997391753	36.3599844873032	19.3229344276233	6.88819990467554	NA	0	0.314531	FALSE	NA	NA	NA	FALSE
ENST00000484683.1	RPRD1B	D30	D4	protein_coding	processed_transcript	23.9477997391753	36.3599844873032	19.3229344276233	4.81262413027682	NA	0	0.0173094	FALSE	NA	NA	NA	FALSE
ENST00000618533.4	RPP40	D30	D4	protein_coding	protein_coding	12.7878053180314	4.44270590913148	12.3038905132715	4.03683083682383	FALSE	0	1	TRUE	yes	no	no	TRUE
ENST00000373622.9	RPN2	D30	D4	protein_coding	protein_coding	132.063029845103	68.6401479680318	137.28590094895	8.25411998968299	FALSE	0	1	TRUE	yes	yes	no	TRUE
ENST00000508595.6	RPL9	D30	D4	protein_coding	protein_coding	1320.42206925951	833.792347908206	1515.18646802238	30.787965869958	FALSE	0	NA	NA	no	no	no	NA
ENST00000296277.9	RPL39L	D30	D4	protein_coding	protein_coding	49.7242301424829	18.0023816077191	23.7536010047954	15.8636812535714	NA	0	0.0271662	FALSE	NA	NA	NA	FALSE
ENST00000433055.1	RPL39L	D30	D4	protein_coding	protein_coding	49.7242301424829	18.0023816077191	23.7536010047954	32.8132985296373	NA	0	0.0500222	FALSE	NA	NA	NA	FALSE
ENST00000320225.10	RNPS1	D30	D4	protein_coding	protein_coding	107.651165914187	51.5523769495469	95.9463898135176	52.5836766510255	FALSE	0	0.998634	TRUE	yes	no	yes	TRUE
ENST00000397086.6	RNPS1	D30	D4	protein_coding	protein_coding	107.651165914187	51.5523769495469	95.9463898135176	10.5112806183858	FALSE	0	0.990811	TRUE	yes	no	yes	TRUE
ENST00000566397.5	RNPS1	D30	D4	protein_coding	protein_coding	107.651165914187	51.5523769495469	95.9463898135176	17.2097544387074	FALSE	0	0.60468	TRUE	yes	no	yes	TRUE
ENST00000474339.1	RNF25	D30	D4	protein_coding	retained_intron	14.1823437436187	15.3914838518831	8.59183495960084	6.03706868601785	NA	0	NA	NA	NA	NA	NA	TRUE
ENST00000430676.6	RMDN1	D30	D4	protein_coding	protein_coding	64.0248673101705	73.6878284302761	59.6902424603084	3.74584413973188	FALSE	0	0.999916	TRUE	no	no	no	NA
ENST00000520719.5	RMDN1	D30	D4	protein_coding	protein_coding	64.0248673101705	73.6878284302761	59.6902424603084	1.04789492131428	NA	0	0.4863	FALSE	NA	NA	NA	NA
ENST00000462842.1	RIPOR3	D30	D4	protein_coding	processed_transcript	1.24311935469948	1.17440158095891	1.6503574677997	0.0908485375493356	NA	0	NA	NA	NA	NA	NA	NA
ENST00000259698.9	RIPOR2	D30	D4	protein_coding	protein_coding	4.81758298377353	7.33342256775023	8.68837996782898	0.171139851860082	FALSE	0	1	TRUE	yes	no	yes	TRUE
ENST00000339750.3	RIMS2	D30	D4	protein_coding	protein_coding	17.3758850905496	8.15862992608715	15.6287155779223	0.124559748709223	FALSE	0	0.995172	TRUE	yes	no	yes	NA
ENST00000436393.6	RIMS2	D30	D4	protein_coding	protein_coding	17.3758850905496	8.15862992608715	15.6287155779223	2.05680314171804	FALSE	0	1	TRUE	yes	no	yes	NA
ENST00000545544.1	RHOF	D30	D4	protein_coding	processed_transcript	9.99160494949262	9.16505273775786	8.37207085111824	1.61133386014044	NA	0	0.0938912	FALSE	NA	NA	NA	TRUE
ENST00000506817.1	RHOBTB3	D30	D4	protein_coding	protein_coding	172.727583494195	179.771466011811	305.508599974456	2.2062284213994	NA	0	0.304718	FALSE	NA	NA	NA	NA
ENST00000510313.1	RHOBTB3	D30	D4	protein_coding	protein_coding	172.727583494195	179.771466011811	305.508599974456	2.74812729689988	NA	0	0.913762	TRUE	NA	NA	NA	NA
ENST00000304685.8	RGL1	D30	D4	protein_coding	protein_coding	7.09555049931543	13.5613164602839	11.0732668953425	2.86379195406376	FALSE	0	1	TRUE	yes	no	yes	FALSE
ENST00000360851.4	RGL1	D30	D4	protein_coding	protein_coding	7.09555049931543	13.5613164602839	11.0732668953425	4.23175854525168	FALSE	0	1	TRUE	yes	no	yes	FALSE
ENST00000436637.5	RFX5	D30	D4	protein_coding	protein_coding	33.3055824692343	19.4960388226344	42.6220134689381	4.4031815369004	FALSE	0	0.991613	TRUE	yes	no	yes	TRUE
ENST00000452671.7	RFX5	D30	D4	protein_coding	protein_coding	33.3055824692343	19.4960388226344	42.6220134689381	9.94625338657147	FALSE	2	1	TRUE	yes	no	yes	TRUE
ENST00000399793.6	RETREG1	D30	D4	protein_coding	protein_coding	8.57017425443656	30.3829417783574	1.68783549881716	1.98827075134345	FALSE	2	1	TRUE	no	no	yes	TRUE
ENST00000506441.1	RETREG1	D30	D4	protein_coding	retained_intron	8.57017425443656	30.3829417783574	1.68783549881716	0.0297044087836925	NA	0	NA	NA	NA	NA	NA	TRUE
ENST00000510362.6	RETREG1	D30	D4	protein_coding	nonsense_mediated_decay	8.57017425443656	30.3829417783574	1.68783549881716	3.73608960899329	TRUE	0	1	TRUE	no	no	yes	TRUE
ENST00000682808.1	RETREG1	D30	D4	protein_coding	processed_transcript	8.57017425443656	30.3829417783574	1.68783549881716	0.333371367327504	NA	0	0.381588	FALSE	NA	NA	NA	TRUE
ENST00000256953.6	RERG	D30	D4	protein_coding	protein_coding	2.78819867162195	8.29578738195315	1.34309369960852	0.73691172221137	FALSE	0	0.983146	TRUE	yes	no	no	TRUE
ENST00000537717.1	RERG	D30	D4	protein_coding	retained_intron	2.78819867162195	8.29578738195315	1.34309369960852	0.552542697999192	NA	0	0.0174912	FALSE	NA	NA	NA	TRUE
ENST00000468247.1	RERE	D30	D4	protein_coding	protein_coding	65.1755608638976	114.162970333258	57.6383233300062	19.256111424499	NA	0	0.0207089	FALSE	NA	NA	NA	FALSE
ENST00000514428.1	RERE	D30	D4	protein_coding	protein_coding	65.1755608638976	114.162970333258	57.6383233300062	9.51853504331173	NA	0	0.0322518	FALSE	NA	NA	NA	FALSE
ENST00000367854.8	RCSD1	D30	D4	protein_coding	protein_coding	10.1833699182742	25.215183428809	3.17309666189591	4.63873621264082	FALSE	0	1	TRUE	yes	no	yes	TRUE
ENST00000475127.5	RCSD1	D30	D4	protein_coding	processed_transcript	10.1833699182742	25.215183428809	3.17309666189591	1.23952716569551	NA	0	0.0151482	FALSE	NA	NA	NA	TRUE
ENST00000357244.7	RC3H2	D30	D4	protein_coding	protein_coding	37.8449908586641	33.147801742395	49.8630915879606	10.316366388306	FALSE	1	1	TRUE	yes	no	yes	TRUE
ENST00000495727.2	RC3H2	D30	D4	protein_coding	retained_intron	37.8449908586641	33.147801742395	49.8630915879606	9.90336043551637	NA	0	0.0195874	FALSE	NA	NA	NA	TRUE
ENST00000463004.5	RBM39	D30	D4	protein_coding	retained_intron	433.620843809986	366.570124799945	517.656929958127	48.2523076091805	NA	2	1	TRUE	NA	NA	NA	NA
ENST00000415472.6	RBM28	D30	D4	protein_coding	protein_coding	69.7074508951142	43.9702203323823	60.2826018211831	9.78973261765256	FALSE	0	1	TRUE	yes	no	yes	TRUE
ENST00000438724.5	RBM26	D30	D4	protein_coding	protein_coding	59.7866867575398	47.9495484787365	59.4751973778873	4.61900080339627	FALSE	0	1	TRUE	yes	no	yes	FALSE
ENST00000438737.3	RBM26	D30	D4	protein_coding	protein_coding	59.7866867575398	47.9495484787365	59.4751973778873	3.52812773998068	FALSE	0	1	TRUE	yes	no	yes	FALSE
ENST00000528081.5	RBM25	D30	D4	protein_coding	nonsense_mediated_decay	133.274966641588	87.4644035201562	132.093529623726	11.6519300700825	TRUE	0	1	TRUE	no	no	yes	NA
ENST00000509686.5	RBM24	D30	D4	protein_coding	protein_coding	75.3355549827346	218.600572506429	18.2741331042375	4.61348549763081	FALSE	0	0.620141	TRUE	yes	no	no	NA
ENST00000359369.8	RBFOX2	D30	D4	protein_coding	protein_coding	133.50330349617	188.726920987692	106.855915162317	10.6903351070333	FALSE	0	1	TRUE	yes	no	yes	TRUE
ENST00000397305.3	RBFOX2	D30	D4	protein_coding	protein_coding	133.50330349617	188.726920987692	106.855915162317	7.01540491368621	NA	0	0.0729982	FALSE	NA	NA	NA	TRUE
ENST00000405409.6	RBFOX2	D30	D4	protein_coding	protein_coding	133.50330349617	188.726920987692	106.855915162317	32.9410284415915	FALSE	0	0.999993	TRUE	yes	no	yes	TRUE
ENST00000438146.7	RBFOX2	D30	D4	protein_coding	protein_coding	133.50330349617	188.726920987692	106.855915162317	24.0809867038096	FALSE	0	1	TRUE	yes	no	yes	TRUE
ENST00000491982.1	RBFOX2	D30	D4	protein_coding	retained_intron	133.50330349617	188.726920987692	106.855915162317	17.2976933490537	NA	0	0.982384	TRUE	NA	NA	NA	TRUE
ENST00000495377.6	RBFOX2	D30	D4	protein_coding	protein_coding	133.50330349617	188.726920987692	106.855915162317	3.94923998617461	NA	0	0.991153	TRUE	NA	NA	NA	TRUE
ENST00000550418.6	RBFOX1	D30	D4	protein_coding	protein_coding	7.01226023166475	20.1305629769902	1.41309980053994	0.0603739511025594	FALSE	0	1	TRUE	yes	no	yes	TRUE
ENST00000569889.1	RBFOX1	D30	D4	protein_coding	processed_transcript	7.01226023166475	20.1305629769902	1.41309980053994	0.544942659036795	NA	0	0.041421	FALSE	NA	NA	NA	TRUE
ENST00000569895.3	RBFOX1	D30	D4	protein_coding	processed_transcript	7.01226023166475	20.1305629769902	1.41309980053994	0.0816044255361791	NA	0	0.990499	TRUE	NA	NA	NA	TRUE
ENST00000620507.4	RBFOX1	D30	D4	protein_coding	protein_coding	7.01226023166475	20.1305629769902	1.41309980053994	0.825880455113993	FALSE	0	1	TRUE	yes	no	yes	TRUE
ENST00000641259.1	RBFOX1	D30	D4	protein_coding	protein_coding	7.01226023166475	20.1305629769902	1.41309980053994	0.0562720931941826	FALSE	0	1	TRUE	yes	no	yes	TRUE
ENST00000675140.1	RBFOX1	D30	D4	protein_coding	retained_intron	7.01226023166475	20.1305629769902	1.41309980053994	0.16476282530128	NA	0	0.406924	FALSE	NA	NA	NA	TRUE
ENST00000262197.7	RBFA	D30	D4	protein_coding	protein_coding	29.0584521065946	17.6636129560837	32.6817804956676	15.7344584446058	FALSE	0	0.997416	TRUE	no	no	no	TRUE
ENST00000586847.1	RBFA	D30	D4	protein_coding	processed_transcript	29.0584521065946	17.6636129560837	32.6817804956676	2.31835023056028	NA	0	0.259107	FALSE	NA	NA	NA	TRUE
ENST00000382214.7	RBCK1	D30	D4	protein_coding	nonsense_mediated_decay	12.2979000880333	10.5784770584256	10.5166615838172	0.473166343381482	TRUE	0	NA	NA	no	no	no	TRUE
ENST00000415942.5	RBCK1	D30	D4	protein_coding	nonsense_mediated_decay	12.2979000880333	10.5784770584256	10.5166615838172	0.761898518615676	TRUE	0	NA	NA	no	no	no	TRUE
ENST00000603017.2	RASL10B	D30	D4	protein_coding	protein_coding	19.3156581349209	20.4506459606363	36.4244484787341	11.2410179645085	FALSE	0	0.952114	TRUE	yes	no	no	TRUE
ENST00000603498.1	RASL10B	D30	D4	protein_coding	processed_transcript	19.3156581349209	20.4506459606363	36.4244484787341	8.07464017041239	NA	0	0.176706	FALSE	NA	NA	NA	TRUE
ENST00000344041.10	RAPGEF5	D30	D4	protein_coding	protein_coding	5.26165462744997	5.01106250158568	8.57652728196657	1.93782891300376	FALSE	0	1	TRUE	yes	no	no	TRUE
ENST00000420196.5	RAPGEF5	D30	D4	protein_coding	protein_coding	5.26165462744997	5.01106250158568	8.57652728196657	0.656845891276649	NA	0	0.187261	FALSE	NA	NA	NA	TRUE
ENST00000503328.1	RAPGEF2	D30	D4	protein_coding	processed_transcript	90.0258923045439	168.855932129738	59.2285893917538	9.27583155367101	NA	0	0.0778373	FALSE	NA	NA	NA	TRUE
ENST00000504604.5	RAPGEF2	D30	D4	protein_coding	processed_transcript	90.0258923045439	168.855932129738	59.2285893917538	5.3475355412241	NA	0	0.239346	FALSE	NA	NA	NA	TRUE
ENST00000505478.5	RAPGEF2	D30	D4	protein_coding	processed_transcript	90.0258923045439	168.855932129738	59.2285893917538	15.9583524270907	NA	0	0.682364	TRUE	NA	NA	NA	TRUE
ENST00000644902.1	RAPGEF2	D30	D4	protein_coding	protein_coding	90.0258923045439	168.855932129738	59.2285893917538	10.5512642271262	FALSE	0	1	TRUE	yes	no	yes	TRUE
ENST00000372189.7	RAPGEF1	D30	D4	protein_coding	protein_coding	17.8570082769476	19.6471549036164	11.6380821873273	8.37347497415492	FALSE	0	1	TRUE	yes	no	yes	TRUE
ENST00000419442.1	RAPGEF1	D30	D4	protein_coding	protein_coding	17.8570082769476	19.6471549036164	11.6380821873273	3.47717374938977	NA	0	0.277328	FALSE	NA	NA	NA	TRUE
ENST00000683357.1	RAPGEF1	D30	D4	protein_coding	protein_coding	17.8570082769476	19.6471549036164	11.6380821873273	0.88284569697699	FALSE	0	1	TRUE	yes	no	yes	TRUE
ENST00000523850.5	RALYL	D30	D4	protein_coding	protein_coding	6.27064269443844	6.93892868522716	7.06007096147787	0.212763298789897	FALSE	0	0.99397	TRUE	no	no	yes	TRUE
ENST00000554704.5	RALGAPA1	D30	D4	protein_coding	processed_transcript	19.584448800686	33.0249893501919	16.8451611752668	2.71951428347389	NA	0	1	TRUE	NA	NA	NA	TRUE
ENST00000680220.1	RALGAPA1	D30	D4	protein_coding	protein_coding	19.584448800686	33.0249893501919	16.8451611752668	1.76942417659995	FALSE	1	1	TRUE	yes	no	yes	TRUE
ENST00000506376.1	RAI14	D30	D4	protein_coding	protein_coding	61.5559823324073	56.9432553846861	35.6785965987622	16.7786793818297	FALSE	0	1	TRUE	yes	no	yes	TRUE
ENST00000512629.5	RAI14	D30	D4	protein_coding	protein_coding	61.5559823324073	56.9432553846861	35.6785965987622	26.5450645505946	FALSE	0	1	TRUE	yes	no	yes	TRUE
ENST00000348035.9	RAC1	D30	D4	protein_coding	protein_coding	205.14128117546	97.357013359796	178.072905130613	83.7710810530684	FALSE	0	0.959848	TRUE	yes	no	no	TRUE
ENST00000497741.5	RAC1	D30	D4	protein_coding	processed_transcript	205.14128117546	97.357013359796	178.072905130613	115.874280711185	NA	0	0.966456	TRUE	NA	NA	NA	TRUE
ENST00000484471.6	RABL6	D30	D4	protein_coding	nonsense_mediated_decay	35.8173521196241	17.1468958439625	53.4853677325259	3.59480225939352	TRUE	0	NA	NA	no	no	no	TRUE
ENST00000462042.5	RABGGTB	D30	D4	protein_coding	processed_transcript	216.62825555456	152.679767093557	190.463974978074	23.8492131552112	NA	0	NA	NA	NA	NA	NA	NA
ENST00000473406.5	RABGGTB	D30	D4	protein_coding	processed_transcript	216.62825555456	152.679767093557	190.463974978074	35.4007474870747	NA	0	NA	NA	NA	NA	NA	NA
ENST00000251507.8	RABGAP1L	D30	D4	protein_coding	protein_coding	91.7040982861562	44.9789745766365	41.4208381330701	7.5679077292654	FALSE	0	1	TRUE	yes	no	yes	TRUE
ENST00000367688.3	RABGAP1L	D30	D4	protein_coding	protein_coding	91.7040982861562	44.9789745766365	41.4208381330701	5.30012777716988	FALSE	0	0.999983	TRUE	no	no	no	TRUE
ENST00000478442.5	RABGAP1L	D30	D4	protein_coding	protein_coding	91.7040982861562	44.9789745766365	41.4208381330701	8.91421929892764	NA	0	0.197134	FALSE	NA	NA	NA	TRUE
ENST00000681986.1	RABGAP1L	D30	D4	protein_coding	protein_coding	91.7040982861562	44.9789745766365	41.4208381330701	4.9862421960393	FALSE	1	1	TRUE	yes	no	yes	TRUE
ENST00000465772.5	RAB18	D30	D4	protein_coding	processed_transcript	108.817320189051	112.147535881227	93.0649084078118	6.24738030490143	NA	0	NA	NA	NA	NA	NA	FALSE
ENST00000683797.1	RAB18	D30	D4	protein_coding	protein_coding	108.817320189051	112.147535881227	93.0649084078118	10.0312096981294	FALSE	0	NA	NA	no	no	no	FALSE
ENST00000264601.8	RAB17	D30	D4	protein_coding	protein_coding	24.8247193652651	3.56877215108756	17.1936611679133	4.45027484150553	FALSE	2	0.998283	TRUE	yes	no	no	TRUE
ENST00000361752.8	QKI	D30	D4	protein_coding	protein_coding	195.537067815403	278.500354953873	182.241357136067	14.8790435916487	FALSE	0	0.999618	TRUE	yes	no	no	TRUE
ENST00000361758.8	QKI	D30	D4	protein_coding	nonsense_mediated_decay	195.537067815403	278.500354953873	182.241357136067	25.1673432120256	TRUE	0	0.999399	TRUE	yes	no	no	TRUE
ENST00000392127.6	QKI	D30	D4	protein_coding	protein_coding	195.537067815403	278.500354953873	182.241357136067	9.07875303884349	FALSE	2	0.999859	TRUE	yes	no	no	TRUE
ENST00000537883.5	QKI	D30	D4	protein_coding	protein_coding	195.537067815403	278.500354953873	182.241357136067	6.06178435469994	NA	0	0.967014	TRUE	NA	NA	NA	TRUE
ENST00000544436.5	QKI	D30	D4	protein_coding	protein_coding	195.537067815403	278.500354953873	182.241357136067	17.1110450992398	NA	0	0.0667424	FALSE	NA	NA	NA	TRUE
ENST00000545607.5	QKI	D30	D4	protein_coding	nonsense_mediated_decay	195.537067815403	278.500354953873	182.241357136067	2.64129984450203	TRUE	0	0.998993	TRUE	no	no	no	TRUE
ENST00000408946.7	PYM1	D30	D4	protein_coding	protein_coding	37.6314067891192	13.4955016516024	33.6068959748441	10.8726387071781	FALSE	0	0.997121	TRUE	yes	no	yes	TRUE
ENST00000356151.7	PXK	D30	D4	protein_coding	protein_coding	13.1106329258802	30.1930303267875	7.63326593732177	1.74507679390649	FALSE	0	1	TRUE	yes	no	yes	TRUE
ENST00000383715.8	PXK	D30	D4	protein_coding	protein_coding	13.1106329258802	30.1930303267875	7.63326593732177	0.772463971353806	FALSE	0	1	TRUE	yes	no	yes	TRUE
ENST00000477308.5	PXK	D30	D4	protein_coding	nonsense_mediated_decay	13.1106329258802	30.1930303267875	7.63326593732177	2.07034479540188	TRUE	0	0.999991	TRUE	yes	no	no	TRUE
ENST00000586067.1	PWWP3A	D30	D4	protein_coding	processed_transcript	22.1335177305502	19.5923498423107	25.7891367540066	1.183443699208	NA	0	0.066284	FALSE	NA	NA	NA	FALSE
ENST00000592099.5	PTPRS	D30	D4	protein_coding	protein_coding	38.3636359508279	19.1857997915567	49.0510655184923	14.3356576018793	FALSE	0	1	TRUE	yes	yes	no	NA
ENST00000368213.9	PTPRK	D30	D4	protein_coding	protein_coding	54.1235422169679	73.9952074595024	38.0336868536849	4.20152751125649	FALSE	0	1	TRUE	yes	yes	no	NA
ENST00000368215.7	PTPRK	D30	D4	protein_coding	protein_coding	54.1235422169679	73.9952074595024	38.0336868536849	9.43942802693698	FALSE	0	1	TRUE	yes	yes	no	NA
ENST00000423100.5	PTPA	D30	D4	protein_coding	protein_coding	26.0247253559905	29.5408778745159	17.7032224554485	1.2224923626437	NA	0	0.0295473	FALSE	NA	NA	NA	TRUE
ENST00000432651.5	PTPA	D30	D4	protein_coding	protein_coding	26.0247253559905	29.5408778745159	17.7032224554485	2.21756348260619	NA	0	0.0301067	FALSE	NA	NA	NA	TRUE
ENST00000380715.5	PSIP1	D30	D4	protein_coding	protein_coding	324.340945934839	91.5899828096592	238.452365972589	10.2454370051524	FALSE	0	0.999999	TRUE	yes	no	yes	TRUE
ENST00000397519.6	PSIP1	D30	D4	protein_coding	protein_coding	324.340945934839	91.5899828096592	238.452365972589	126.671090176057	FALSE	0	0.999999	TRUE	yes	no	yes	TRUE
ENST00000484265.1	PSIP1	D30	D4	protein_coding	processed_transcript	324.340945934839	91.5899828096592	238.452365972589	2.44126972951851	NA	0	0.099647	FALSE	NA	NA	NA	TRUE
ENST00000495873.1	PSIP1	D30	D4	protein_coding	processed_transcript	324.340945934839	91.5899828096592	238.452365972589	14.5223513320258	NA	0	0.026841	FALSE	NA	NA	NA	TRUE
ENST00000495488.5	PSEN2	D30	D4	protein_coding	protein_coding	35.3534159077024	44.9524235429131	38.0992898003383	1.41813481676245	NA	0	0.126496	FALSE	NA	NA	NA	NA
ENST00000394936.8	PSAP	D30	D4	protein_coding	protein_coding	471.620986008573	535.481137820661	426.756658775107	176.792344774396	FALSE	0	1	TRUE	yes	yes	no	TRUE
ENST00000633965.1	PSAP	D30	D4	protein_coding	protein_coding	471.620986008573	535.481137820661	426.756658775107	279.829382006846	NA	0	0.155495	FALSE	NA	NA	NA	TRUE
ENST00000271620.8	PRUNE1	D30	D4	protein_coding	protein_coding	10.8753830153728	11.5475802439597	7.13717081071141	5.60749251370214	FALSE	0	1	TRUE	yes	no	yes	TRUE
ENST00000368934.1	PRUNE1	D30	D4	protein_coding	protein_coding	10.8753830153728	11.5475802439597	7.13717081071141	1.7398854340312	FALSE	0	0.999589	TRUE	yes	no	yes	TRUE
ENST00000368936.5	PRUNE1	D30	D4	protein_coding	protein_coding	10.8753830153728	11.5475802439597	7.13717081071141	1.82320238367068	FALSE	0	0.99998	TRUE	yes	no	yes	TRUE
ENST00000389286.9	PRTG	D30	D4	protein_coding	protein_coding	113.323822850496	22.4292427496038	287.256155614372	98.0522166855216	FALSE	0	1	TRUE	yes	yes	yes	TRUE
ENST00000558349.1	PRTG	D30	D4	protein_coding	protein_coding	113.323822850496	22.4292427496038	287.256155614372	4.62634453403775	NA	0	0.079464	FALSE	NA	NA	NA	TRUE
ENST00000561465.1	PRTG	D30	D4	protein_coding	protein_coding	113.323822850496	22.4292427496038	287.256155614372	2.31726695520604	FALSE	0	0.995257	TRUE	yes	no	no	TRUE
ENST00000623053.1	PRTG	D30	D4	protein_coding	TEC	113.323822850496	22.4292427496038	287.256155614372	3.56182474660384	NA	0	0.0116239	FALSE	NA	NA	NA	TRUE
ENST00000683519.1	PRRC2B	D30	D4	protein_coding	protein_coding	60.2494828066591	55.3747572461647	50.0954912892419	3.16740254916253	FALSE	0	1	TRUE	yes	no	yes	NA
ENST00000557404.3	PRORP	D30	D4	protein_coding	protein_coding	22.8728121802769	14.8967967620074	20.0680140338046	0.587096191651949	NA	0	0.221993	FALSE	NA	NA	NA	NA
ENST00000334029.6	PRODH	D30	D4	protein_coding	protein_coding	6.26678883242174	2.11238075913705	10.8914509800709	1.28062187416343	FALSE	0	1	TRUE	yes	no	no	TRUE
ENST00000366898.6	PRKN	D30	D4	protein_coding	protein_coding	7.59367155211277	16.414451280672	5.45109074719145	1.91926395157942	FALSE	0	1	TRUE	yes	no	no	TRUE
ENST00000674224.1	PRKN	D30	D4	protein_coding	retained_intron	7.59367155211277	16.414451280672	5.45109074719145	1.39810785474267	NA	0	0.0245626	FALSE	NA	NA	NA	TRUE
ENST00000373980.11	PRKG1	D30	D4	protein_coding	protein_coding	16.3816507636002	16.5615008623763	16.7557864061487	8.47528110686626	FALSE	0	1	TRUE	yes	no	no	FALSE
ENST00000401604.8	PRKG1	D30	D4	protein_coding	protein_coding	16.3816507636002	16.5615008623763	16.7557864061487	1.11373912808989	FALSE	0	1	TRUE	yes	no	no	FALSE
ENST00000586486.1	PRKCSH	D30	D4	protein_coding	nonsense_mediated_decay	89.8086492030076	53.0332360378337	93.2604741486293	4.85834590487309	TRUE	0	0.998001	TRUE	yes	no	yes	TRUE
ENST00000589126.5	PRKCSH	D30	D4	protein_coding	protein_coding	89.8086492030076	53.0332360378337	93.2604741486293	9.98863539904984	NA	0	0.122019	FALSE	NA	NA	NA	TRUE
ENST00000589838.5	PRKCSH	D30	D4	protein_coding	protein_coding	89.8086492030076	53.0332360378337	93.2604741486293	17.2902204083787	FALSE	0	1	TRUE	yes	yes	yes	TRUE
ENST00000358598.6	PRKAR1A	D30	D4	protein_coding	protein_coding	237.297165673463	342.674259634415	202.394537530119	40.069451408461	FALSE	0	1	TRUE	yes	no	yes	FALSE
ENST00000418337.6	PRKAG2	D30	D4	protein_coding	protein_coding	19.4425546679681	39.799392719441	8.47604579350669	5.22393745155954	FALSE	0	1	TRUE	yes	no	no	TRUE
ENST00000485183.1	PRKAG2	D30	D4	protein_coding	retained_intron	19.4425546679681	39.799392719441	8.47604579350669	0.754603732487449	NA	0	0.0766479	FALSE	NA	NA	NA	TRUE
ENST00000492843.6	PRKAG2	D30	D4	protein_coding	protein_coding	19.4425546679681	39.799392719441	8.47604579350669	2.12767087150379	FALSE	0	1	TRUE	yes	no	yes	TRUE
ENST00000650664.1	PRKAG2	D30	D4	protein_coding	retained_intron	19.4425546679681	39.799392719441	8.47604579350669	1.18187445850956	NA	0	0.121019	FALSE	NA	NA	NA	TRUE
ENST00000650851.1	PRKAG2	D30	D4	protein_coding	retained_intron	19.4425546679681	39.799392719441	8.47604579350669	0.943207797177183	NA	0	0.999999	TRUE	NA	NA	NA	TRUE
ENST00000652572.1	PRKAG2	D30	D4	protein_coding	retained_intron	19.4425546679681	39.799392719441	8.47604579350669	0.976040014338108	NA	0	0.352953	FALSE	NA	NA	NA	TRUE
ENST00000260648.10	PREPL	D30	D4	protein_coding	protein_coding	28.4887557568881	39.0947363877475	28.5844807237357	5.33934607428669	FALSE	0	1	TRUE	yes	no	no	NA
ENST00000356692.10	PPP4R2	D30	D4	protein_coding	protein_coding	65.5012603458144	56.1766648015878	66.3966722924451	40.6022882981624	FALSE	0	1	TRUE	yes	no	yes	TRUE
ENST00000556484.5	PPP2R5E	D30	D4	protein_coding	processed_transcript	21.8585689074147	13.4992278997297	21.3351566560121	3.37377901522483	NA	0	1	TRUE	NA	NA	NA	TRUE
ENST00000445792.7	PPP2R3B	D30	D4	protein_coding	retained_intron	20.993025203046	25.582580268975	16.6614402531851	0.363829667409027	NA	0	0.99999	TRUE	NA	NA	NA	NA
ENST00000264977.8	PPP2R3A	D30	D4	protein_coding	protein_coding	27.3708834961895	49.1607251948162	18.5419961700833	10.7309256370189	FALSE	0	1	TRUE	yes	no	yes	TRUE
ENST00000334546.6	PPP2R3A	D30	D4	protein_coding	protein_coding	27.3708834961895	49.1607251948162	18.5419961700833	11.6977042123547	FALSE	0	1	TRUE	yes	no	yes	TRUE
ENST00000490467.5	PPP2R3A	D30	D4	protein_coding	protein_coding	27.3708834961895	49.1607251948162	18.5419961700833	4.29550563498714	FALSE	0	1	TRUE	yes	no	no	TRUE
ENST00000528430.2	PPP1R16A	D30	D4	protein_coding	retained_intron	9.76673825946596	10.4196653282095	4.51096930539385	3.63833641556171	NA	0	0.0771405	FALSE	NA	NA	NA	TRUE
ENST00000434615.2	PPP1R12B	D30	D4	protein_coding	nonsense_mediated_decay	97.3151903231984	275.578629210575	13.3518293425992	1.75895293659874	NA	0	0.0265113	FALSE	NA	NA	NA	TRUE
ENST00000466968.1	PPP1R12B	D30	D4	protein_coding	protein_coding	97.3151903231984	275.578629210575	13.3518293425992	2.8081823840005	NA	0	0.132928	FALSE	NA	NA	NA	TRUE
ENST00000480184.5	PPP1R12B	D30	D4	protein_coding	protein_coding	97.3151903231984	275.578629210575	13.3518293425992	2.27212664138831	FALSE	0	1	TRUE	yes	no	yes	TRUE
ENST00000491336.5	PPP1R12B	D30	D4	protein_coding	protein_coding	97.3151903231984	275.578629210575	13.3518293425992	34.238762453802	FALSE	0	0.995655	TRUE	yes	no	yes	TRUE
ENST00000608999.6	PPP1R12B	D30	D4	protein_coding	protein_coding	97.3151903231984	275.578629210575	13.3518293425992	20.4066768621186	FALSE	0	1	TRUE	yes	no	yes	TRUE
ENST00000618451.1	PPP1R12B	D30	D4	protein_coding	retained_intron	97.3151903231984	275.578629210575	13.3518293425992	4.92126261886149	NA	0	0.0386443	FALSE	NA	NA	NA	TRUE
ENST00000634903.1	PPP1R12B	D30	D4	protein_coding	protein_coding	97.3151903231984	275.578629210575	13.3518293425992	6.32473884933935	FALSE	0	0.986722	TRUE	yes	no	yes	TRUE
ENST00000376511.7	PPP1R10	D30	D4	protein_coding	protein_coding	70.6415555042081	69.3360958318363	76.6357768108768	15.4284115318047	FALSE	0	1	TRUE	yes	no	yes	TRUE
ENST00000484449.1	PPP1R10	D30	D4	protein_coding	processed_transcript	70.6415555042081	69.3360958318363	76.6357768108768	28.3836319215377	NA	0	0.0115585	FALSE	NA	NA	NA	TRUE
ENST00000295908.11	PPM1K	D30	D4	protein_coding	protein_coding	14.4309536809376	29.3100597785989	5.66617393925314	2.43338162273012	FALSE	0	0.999992	TRUE	yes	no	no	TRUE
ENST00000508256.5	PPM1K	D30	D4	protein_coding	protein_coding	14.4309536809376	29.3100597785989	5.66617393925314	0.848578324215431	FALSE	0	0.978631	TRUE	yes	no	no	TRUE
ENST00000650027.1	PPFIBP2	D30	D4	protein_coding	protein_coding	16.1921066153733	20.9656523140628	15.1297631452219	0.281171986855941	NA	1	0.120881	FALSE	NA	NA	NA	NA
ENST00000503714.1	PPARGC1A	D30	D4	protein_coding	processed_transcript	31.6792679808183	100.380433211091	2.41935127215641	2.26141384785812	NA	0	0.0159149	FALSE	NA	NA	NA	NA
ENST00000514479.1	PPARGC1A	D30	D4	protein_coding	retained_intron	31.6792679808183	100.380433211091	2.41935127215641	2.01255958207783	NA	0	0.0397662	FALSE	NA	NA	NA	NA
ENST00000468881.1	PPAN	D30	D4	protein_coding	retained_intron	15.1199252179152	8.41944005377925	14.1787536911707	2.5557881691442	NA	1	0.0665398	FALSE	NA	NA	NA	TRUE
ENST00000472520.5	PORCN	D30	D4	protein_coding	nonsense_mediated_decay	3.89170851668971	2.88363358617754	3.78895366797377	1.84807465485213	TRUE	0	NA	NA	no	no	no	TRUE
ENST00000687440.1	POMGNT2	D30	D4	protein_coding	protein_coding	3.27938793199908	2.9207638881007	3.04175999996606	0.120168642622395	FALSE	0	1	TRUE	yes	no	no	FALSE
ENST00000398379.2	POM121C	D30	D4	protein_coding	protein_coding	16.6645682552855	16.4030843846797	20.5485176297307	4.71741789136506	NA	0	0.309576	FALSE	NA	NA	NA	FALSE
ENST00000473168.1	POM121C	D30	D4	protein_coding	processed_transcript	16.6645682552855	16.4030843846797	20.5485176297307	0.449421772412205	NA	0	0.0456129	FALSE	NA	NA	NA	FALSE
ENST00000374169.7	POLE3	D30	D4	protein_coding	protein_coding	31.3019642397525	21.3748782034759	27.9773709962486	24.0512741350052	FALSE	0	0.938129	TRUE	yes	no	yes	FALSE
ENST00000374171.5	POLE3	D30	D4	protein_coding	protein_coding	31.3019642397525	21.3748782034759	27.9773709962486	3.89134416536745	FALSE	0	0.918959	TRUE	yes	no	yes	FALSE
ENST00000451615.1	POFUT2	D30	D4	protein_coding	protein_coding	10.725041369787	9.86825378217995	12.7116383822435	1.67154175185252	NA	0	NA	NA	NA	NA	NA	FALSE
ENST00000471540.5	POFUT2	D30	D4	protein_coding	processed_transcript	10.725041369787	9.86825378217995	12.7116383822435	0.337042952990645	NA	0	NA	NA	NA	NA	NA	FALSE
ENST00000460600.1	PNISR	D30	D4	protein_coding	retained_intron	283.154678388111	306.420407179791	316.763200507613	39.9192336038362	NA	1	NA	NA	NA	NA	NA	NA
ENST00000282903.10	PLOD2	D30	D4	protein_coding	protein_coding	125.262874320006	245.611307672126	115.014613572022	29.2496244858599	FALSE	0	1	TRUE	yes	yes	no	FALSE
ENST00000360060.7	PLOD2	D30	D4	protein_coding	protein_coding	125.262874320006	245.611307672126	115.014613572022	36.8319793601906	FALSE	0	1	TRUE	yes	yes	no	FALSE
ENST00000478436.1	PLOD2	D30	D4	protein_coding	retained_intron	125.262874320006	245.611307672126	115.014613572022	7.88919585805133	NA	1	0.693453	TRUE	NA	NA	NA	FALSE
ENST00000480704.1	PLOD2	D30	D4	protein_coding	nonsense_mediated_decay	125.262874320006	245.611307672126	115.014613572022	10.6008285862613	NA	0	0.480293	FALSE	NA	NA	NA	FALSE
ENST00000375793.2	PLEKHM2	D30	D4	protein_coding	protein_coding	10.5606008370129	9.11161260707275	11.4125923500226	8.61299000261851	FALSE	1	1	TRUE	yes	no	yes	TRUE
ENST00000375799.8	PLEKHM2	D30	D4	protein_coding	protein_coding	10.5606008370129	9.11161260707275	11.4125923500226	0.387145873672404	FALSE	1	1	TRUE	yes	no	yes	TRUE
ENST00000587627.1	PLEKHH3	D30	D4	protein_coding	protein_coding	4.83664122101418	3.07463587610193	3.55488278642488	0.43059146428092	NA	0	0.181527	FALSE	NA	NA	NA	TRUE
ENST00000355661.7	PLEKHA7	D30	D4	protein_coding	protein_coding	24.9806624024825	65.1662783729558	10.7626239549301	2.38232615635581	FALSE	0	1	TRUE	yes	no	yes	TRUE
ENST00000530489.5	PLEKHA7	D30	D4	protein_coding	protein_coding	24.9806624024825	65.1662783729558	10.7626239549301	2.84372732034531	NA	0	1	TRUE	NA	NA	NA	TRUE
ENST00000531066.6	PLEKHA7	D30	D4	protein_coding	protein_coding	24.9806624024825	65.1662783729558	10.7626239549301	3.72164514131543	FALSE	0	1	TRUE	yes	no	yes	TRUE
ENST00000531079.1	PLEKHA7	D30	D4	protein_coding	retained_intron	24.9806624024825	65.1662783729558	10.7626239549301	6.38368335592061	NA	0	0.080709	FALSE	NA	NA	NA	TRUE
ENST00000636090.1	PLEKHA7	D30	D4	protein_coding	protein_coding	24.9806624024825	65.1662783729558	10.7626239549301	1.41065460780083	NA	0	0.999991	TRUE	NA	NA	NA	TRUE
ENST00000414478.1	PLEKHA6	D30	D4	protein_coding	protein_coding	8.68791822375511	5.31959317721119	18.7422358040937	2.20870142579026	FALSE	0	1	TRUE	yes	no	yes	TRUE
ENST00000485632.1	PLEKHA6	D30	D4	protein_coding	processed_transcript	8.68791822375511	5.31959317721119	18.7422358040937	0.865877074936201	NA	0	0.178501	FALSE	NA	NA	NA	TRUE
ENST00000368988.5	PLEKHA1	D30	D4	protein_coding	protein_coding	26.5649888094461	35.4980583446661	29.9183264451907	4.10693351198137	FALSE	0	0.999826	TRUE	yes	no	no	TRUE
ENST00000368989.6	PLEKHA1	D30	D4	protein_coding	protein_coding	26.5649888094461	35.4980583446661	29.9183264451907	5.92405967313208	FALSE	1	0.999885	TRUE	yes	no	no	TRUE
ENST00000354958.6	PLEC	D30	D4	protein_coding	protein_coding	11.049964906637	12.5933258189019	7.95440081787272	4.06702440848377	FALSE	0	1	TRUE	yes	no	yes	TRUE
ENST00000398774.6	PLEC	D30	D4	protein_coding	protein_coding	11.049964906637	12.5933258189019	7.95440081787272	1.15743382945248	FALSE	0	1	TRUE	yes	no	yes	TRUE
ENST00000528025.6	PLEC	D30	D4	protein_coding	protein_coding	11.049964906637	12.5933258189019	7.95440081787272	0.312930439777386	FALSE	0	1	TRUE	yes	no	yes	TRUE
ENST00000564138.6	PLCG2	D30	D4	protein_coding	protein_coding	5.7693804513395	4.56186666445581	7.30433688035893	1.78148002859523	FALSE	0	1	TRUE	yes	no	no	TRUE
ENST00000565400.5	PLCG2	D30	D4	protein_coding	processed_transcript	5.7693804513395	4.56186666445581	7.30433688035893	0.897459955790321	NA	0	0.845437	TRUE	NA	NA	NA	TRUE
ENST00000569523.1	PLCG2	D30	D4	protein_coding	processed_transcript	5.7693804513395	4.56186666445581	7.30433688035893	0.170912547574481	NA	0	0.123836	FALSE	NA	NA	NA	TRUE
ENST00000626161.1	PLCB1	D30	D4	protein_coding	retained_intron	28.4683991338971	12.4796128373082	55.873428957116	0.648090057307319	NA	0	NA	NA	NA	NA	NA	NA
ENST00000402064.5	PLA2G6	D30	D4	protein_coding	protein_coding	7.99101891617057	9.60595027457583	7.60161978629682	0.216196907316589	FALSE	2	1	TRUE	yes	no	no	TRUE
ENST00000452794.5	PLA2G6	D30	D4	protein_coding	retained_intron	7.99101891617057	9.60595027457583	7.60161978629682	0.576519737463855	NA	1	0.585423	TRUE	NA	NA	NA	TRUE
ENST00000491986.1	PLA2G6	D30	D4	protein_coding	retained_intron	7.99101891617057	9.60595027457583	7.60161978629682	0.431509068476438	NA	0	0.112114	FALSE	NA	NA	NA	TRUE
ENST00000568743.1	PKM	D30	D4	protein_coding	retained_intron	1275.36597484362	950.537018833926	1427.02578224425	180.075160464527	NA	0	0.0758677	FALSE	NA	NA	NA	TRUE
ENST00000262304.9	PKD1	D30	D4	protein_coding	protein_coding	18.2397130163115	16.4191498714965	17.8474294981465	1.17956823277891	FALSE	3	NA	NA	no	no	no	FALSE
ENST00000566905.5	PKD1	D30	D4	protein_coding	processed_transcript	18.2397130163115	16.4191498714965	17.8474294981465	0.252333650319699	NA	1	NA	NA	NA	NA	NA	FALSE
ENST00000568796.1	PKD1	D30	D4	protein_coding	retained_intron	18.2397130163115	16.4191498714965	17.8474294981465	1.95365528683996	NA	0	NA	NA	NA	NA	NA	FALSE
ENST00000616641.5	PITX2	D30	D4	protein_coding	retained_intron	12.4004384739347	5.77360728839227	22.1885530975794	1.41461027980345	NA	0	NA	NA	NA	NA	NA	FALSE
ENST00000395844.8	PIGL	D30	D4	protein_coding	protein_coding	35.9989044233155	35.0614388226417	36.5701294715936	2.22137886885598	FALSE	0	0.999954	TRUE	yes	no	no	TRUE
ENST00000580201.1	PIGL	D30	D4	protein_coding	processed_transcript	35.9989044233155	35.0614388226417	36.5701294715936	8.33589748457206	NA	0	0.0688661	FALSE	NA	NA	NA	TRUE
ENST00000482786.5	PIGF	D30	D4	protein_coding	processed_transcript	35.6037634665409	24.6610834155088	37.0325252098529	4.87260572586437	NA	0	0.0525575	FALSE	NA	NA	NA	NA
ENST00000466823.3	PIEZO1	D30	D4	protein_coding	protein_coding	14.9924544295477	14.1429524883295	26.3987240468997	4.23230592021905	NA	0	0.966106	TRUE	NA	NA	NA	TRUE
ENST00000532550.1	PHRF1	D30	D4	protein_coding	retained_intron	11.0332731926991	7.52852149833955	11.6342524893256	0.415381121303898	NA	0	NA	NA	NA	NA	NA	NA
ENST00000478733.6	PHLDB2	D30	D4	protein_coding	protein_coding	67.7946009388844	100.835629186382	45.7856996311908	7.17544293328135	NA	0	0.999802	TRUE	NA	NA	NA	TRUE
ENST00000638331.1	PHLDB2	D30	D4	protein_coding	protein_coding	67.7946009388844	100.835629186382	45.7856996311908	4.24847618123264	FALSE	0	0.999851	TRUE	yes	no	yes	TRUE
ENST00000640905.1	PHLDB2	D30	D4	protein_coding	protein_coding	67.7946009388844	100.835629186382	45.7856996311908	1.15066871482409	FALSE	0	NA	NA	no	no	no	TRUE
ENST00000565924.5	PHKG2	D30	D4	protein_coding	protein_coding	9.79126509408715	8.33523863621364	8.09544101561992	2.32079540931018	FALSE	0	NA	NA	no	no	no	NA
ENST00000473050.1	PHF14	D30	D4	protein_coding	retained_intron	55.8048660033101	46.8350359673326	56.3771239291389	1.49080670541354	NA	0	0.0196723	FALSE	NA	NA	NA	NA
ENST00000634607.2	PHF14	D30	D4	protein_coding	protein_coding	55.8048660033101	46.8350359673326	56.3771239291389	35.2625656315278	FALSE	0	1	TRUE	yes	no	yes	NA
ENST00000642461.1	PHF14	D30	D4	protein_coding	protein_coding	55.8048660033101	46.8350359673326	56.3771239291389	4.07680229205057	FALSE	2	1	TRUE	yes	no	yes	NA
ENST00000473158.1	PHC2	D30	D4	protein_coding	processed_transcript	22.0383237325125	30.3937259142531	20.7011844758118	3.99594138463659	NA	0	0.152158	FALSE	NA	NA	NA	TRUE
ENST00000406205.7	PHACTR1	D30	D4	protein_coding	protein_coding	11.2734774247091	18.8588526377256	7.27205580287765	0.30144684320118	NA	0	0.20621	FALSE	NA	NA	NA	TRUE
ENST00000481706.1	PHACTR1	D30	D4	protein_coding	retained_intron	11.2734774247091	18.8588526377256	7.27205580287765	0.75128533811358	NA	0	0.0166525	FALSE	NA	NA	NA	TRUE
ENST00000675203.2	PHACTR1	D30	D4	protein_coding	protein_coding	11.2734774247091	18.8588526377256	7.27205580287765	1.46011726303309	FALSE	0	1	TRUE	yes	no	yes	TRUE
ENST00000676234.1	PHACTR1	D30	D4	protein_coding	protein_coding	11.2734774247091	18.8588526377256	7.27205580287765	0.376549499533435	FALSE	1	1	TRUE	yes	no	yes	TRUE
ENST00000687849.1	PHACTR1	D30	D4	protein_coding	processed_transcript	11.2734774247091	18.8588526377256	7.27205580287765	1.70293375900231	NA	0	0.0088826	FALSE	NA	NA	NA	TRUE
ENST00000689397.1	PHACTR1	D30	D4	protein_coding	processed_transcript	11.2734774247091	18.8588526377256	7.27205580287765	0.241771652300592	NA	0	0.032501	FALSE	NA	NA	NA	TRUE
ENST00000692662.1	PHACTR1	D30	D4	protein_coding	retained_intron	11.2734774247091	18.8588526377256	7.27205580287765	0.438618817233303	NA	1	0.967244	TRUE	NA	NA	NA	TRUE
ENST00000381072.5	PFKP	D30	D4	protein_coding	retained_intron	144.142613698299	280.29649927272	121.28349491265	5.60803539943234	NA	0	0.962345	TRUE	NA	NA	NA	TRUE
ENST00000381125.9	PFKP	D30	D4	protein_coding	protein_coding	144.142613698299	280.29649927272	121.28349491265	88.2947842278811	FALSE	0	1	TRUE	yes	no	no	TRUE
ENST00000413079.1	PFKP	D30	D4	protein_coding	protein_coding	144.142613698299	280.29649927272	121.28349491265	5.18566068552135	NA	0	0.112684	FALSE	NA	NA	NA	TRUE
ENST00000468050.1	PFKP	D30	D4	protein_coding	protein_coding	144.142613698299	280.29649927272	121.28349491265	9.34749323694001	NA	0	0.0719901	FALSE	NA	NA	NA	TRUE
ENST00000639949.1	PFKFB3	D30	D4	protein_coding	protein_coding	28.0345581163755	33.4656297445599	43.7476684853824	6.90555024410236	NA	0	0.156	FALSE	NA	NA	NA	TRUE
ENST00000504318.5	PDLIM7	D30	D4	protein_coding	retained_intron	27.9399061558668	48.4651923785956	24.1411138333384	4.68016751434902	NA	1	NA	NA	NA	NA	NA	TRUE
ENST00000317968.9	PDLIM5	D30	D4	protein_coding	protein_coding	153.075423057083	509.788434511277	17.2988582371956	18.4687423407748	FALSE	0	1	TRUE	yes	no	yes	TRUE
ENST00000359265.8	PDLIM5	D30	D4	protein_coding	protein_coding	153.075423057083	509.788434511277	17.2988582371956	13.1479202284813	NA	0	0.379772	FALSE	NA	NA	NA	TRUE
ENST00000380176.7	PDLIM5	D30	D4	protein_coding	processed_transcript	153.075423057083	509.788434511277	17.2988582371956	5.70007334586002	NA	0	0.999148	TRUE	NA	NA	NA	TRUE
ENST00000508216.5	PDLIM5	D30	D4	protein_coding	protein_coding	153.075423057083	509.788434511277	17.2988582371956	19.5178519411597	FALSE	0	0.996336	TRUE	yes	no	yes	TRUE
ENST00000615540.4	PDLIM5	D30	D4	protein_coding	protein_coding	153.075423057083	509.788434511277	17.2988582371956	33.4010217550658	FALSE	0	1	TRUE	yes	no	yes	TRUE
ENST00000686374.1	PDIA3	D30	D4	protein_coding	retained_intron	349.690798674323	237.92853032184	269.883250378437	23.2039696250243	NA	0	0.135824	FALSE	NA	NA	NA	TRUE
ENST00000457054.6	PDCD6IP	D30	D4	protein_coding	protein_coding	82.9573387144272	120.043609993836	76.5892562111559	3.33118328961812	FALSE	0	1	TRUE	yes	no	yes	FALSE
ENST00000459659.1	PDCD6IP	D30	D4	protein_coding	retained_intron	82.9573387144272	120.043609993836	76.5892562111559	6.34127079164801	NA	0	0.266829	FALSE	NA	NA	NA	FALSE
ENST00000482561.1	PDCD6IP	D30	D4	protein_coding	processed_transcript	82.9573387144272	120.043609993836	76.5892562111559	10.8186475956345	NA	0	0.033391	FALSE	NA	NA	NA	FALSE
ENST00000258229.14	PCNX2	D30	D4	protein_coding	protein_coding	19.5669221750354	9.20254184246842	14.3783749522429	6.3027373922379	FALSE	1	1	TRUE	yes	no	yes	TRUE
ENST00000497623.1	PCNX2	D30	D4	protein_coding	retained_intron	19.5669221750354	9.20254184246842	14.3783749522429	2.38989311103569	NA	0	0.165003	FALSE	NA	NA	NA	TRUE
ENST00000367384.7	PCMT1	D30	D4	protein_coding	protein_coding	59.1714658401969	54.5276473862612	46.4554615493299	9.97676641054444	FALSE	0	0.999993	TRUE	yes	no	no	NA
ENST00000493133.1	PBXIP1	D30	D4	protein_coding	processed_transcript	19.9588972313855	38.0571904353114	13.1663165107783	0.332780850421489	NA	1	0.0406232	FALSE	NA	NA	NA	NA
ENST00000428092.1	PBX3	D30	D4	protein_coding	protein_coding	95.997183239241	88.7602694506121	168.783782719739	25.6862782506941	NA	0	0.172632	FALSE	NA	NA	NA	TRUE
ENST00000491787.7	PBX3	D30	D4	protein_coding	protein_coding	95.997183239241	88.7602694506121	168.783782719739	1.94446281104668	NA	0	0.107201	FALSE	NA	NA	NA	TRUE
ENST00000468104.5	PBX1	D30	D4	protein_coding	processed_transcript	74.9969929869607	136.260535098289	64.1112291915663	2.46056872362543	NA	0	0.999854	TRUE	NA	NA	NA	NA
ENST00000457196.5	PAXIP1	D30	D4	protein_coding	nonsense_mediated_decay	19.560265865762	8.13364273510627	22.5702209432085	1.35446685877511	TRUE	0	1	TRUE	no	no	no	NA
ENST00000464717.5	PAXIP1	D30	D4	protein_coding	retained_intron	19.560265865762	8.13364273510627	22.5702209432085	1.0786398226988	NA	0	0.999795	TRUE	NA	NA	NA	NA
ENST00000473219.5	PAXIP1	D30	D4	protein_coding	processed_transcript	19.560265865762	8.13364273510627	22.5702209432085	1.481844204677	NA	0	1	TRUE	NA	NA	NA	NA
ENST00000340077.9	PARD3	D30	D4	protein_coding	protein_coding	80.962781237522	62.0041613852499	79.3392801105417	9.77055567058031	FALSE	0	NA	NA	no	no	no	FALSE
ENST00000374773.6	PARD3	D30	D4	protein_coding	protein_coding	80.962781237522	62.0041613852499	79.3392801105417	7.00558619806792	FALSE	0	NA	NA	no	no	no	FALSE
ENST00000374794.8	PARD3	D30	D4	protein_coding	protein_coding	80.962781237522	62.0041613852499	79.3392801105417	3.28198941167235	FALSE	0	NA	NA	no	no	no	FALSE
ENST00000684043.1	PAM	D30	D4	protein_coding	protein_coding	116.025477658748	286.422958708409	67.5326786425675	29.5733117291126	FALSE	0	1	TRUE	yes	no	yes	TRUE
ENST00000314527.9	PALM2AKAP2	D30	D4	protein_coding	protein_coding	75.0325588169423	143.147755434761	33.6016014000563	1.76772134030189	FALSE	0	1	TRUE	yes	no	yes	NA
ENST00000374530.7	PALM2AKAP2	D30	D4	protein_coding	protein_coding	75.0325588169423	143.147755434761	33.6016014000563	7.43527340130719	FALSE	1	1	TRUE	yes	no	yes	NA
ENST00000482335.1	PALM2AKAP2	D30	D4	protein_coding	processed_transcript	75.0325588169423	143.147755434761	33.6016014000563	20.9803796849445	NA	0	0.213082	FALSE	NA	NA	NA	NA
ENST00000261509.10	PALLD	D30	D4	protein_coding	protein_coding	57.7973798271833	152.213050038867	15.520343773382	6.81454244989578	FALSE	1	1	TRUE	yes	no	yes	TRUE
ENST00000505667.6	PALLD	D30	D4	protein_coding	protein_coding	57.7973798271833	152.213050038867	15.520343773382	5.76211919986024	FALSE	1	1	TRUE	yes	no	yes	TRUE
ENST00000507735.6	PALLD	D30	D4	protein_coding	protein_coding	57.7973798271833	152.213050038867	15.520343773382	2.06155487649814	FALSE	1	1	TRUE	yes	no	yes	TRUE
ENST00000510998.5	PALLD	D30	D4	protein_coding	protein_coding	57.7973798271833	152.213050038867	15.520343773382	2.31139724023453	NA	1	0.0593265	FALSE	NA	NA	NA	TRUE
ENST00000649826.1	PALLD	D30	D4	protein_coding	protein_coding	57.7973798271833	152.213050038867	15.520343773382	15.6103719262105	NA	0	0.77355	TRUE	NA	NA	NA	TRUE
ENST00000595564.5	PAF1	D30	D4	protein_coding	protein_coding	29.5373895008427	26.505648575058	29.666792517398	3.40540960498976	FALSE	0	1	TRUE	yes	no	yes	TRUE
ENST00000482240.5	PABIR3	D30	D4	protein_coding	protein_coding	4.82241194888317	6.77860804137335	7.31092159310874	0.605032366029611	NA	0	0.251617	FALSE	NA	NA	NA	NA
ENST00000554788.5	OTX2	D30	D4	protein_coding	protein_coding	27.871014925929	6.10136871869961	57.3282627405324	2.21335947917111	FALSE	1	NA	NA	no	no	no	NA
ENST00000447887.5	OSBPL9	D30	D4	protein_coding	protein_coding	124.658398218974	177.121360406009	106.062167552821	3.44122127612035	FALSE	0	NA	NA	no	no	no	NA
ENST00000467064.5	OSBPL9	D30	D4	protein_coding	retained_intron	124.658398218974	177.121360406009	106.062167552821	2.89524779814259	NA	0	NA	NA	NA	NA	NA	NA
ENST00000475697.5	OSBPL9	D30	D4	protein_coding	retained_intron	124.658398218974	177.121360406009	106.062167552821	9.26005830053183	NA	0	NA	NA	NA	NA	NA	NA
ENST00000484890.5	OSBPL9	D30	D4	protein_coding	retained_intron	124.658398218974	177.121360406009	106.062167552821	3.07825751053687	NA	0	NA	NA	NA	NA	NA	NA
ENST00000534040.5	OSBPL9	D30	D4	protein_coding	nonsense_mediated_decay	124.658398218974	177.121360406009	106.062167552821	1.66591468038348	TRUE	0	NA	NA	no	no	no	NA
ENST00000393250.8	OSBPL8	D30	D4	protein_coding	protein_coding	69.0378810000694	82.4976204343919	57.5943335620798	17.3159735159442	FALSE	0	NA	NA	no	no	no	TRUE
ENST00000546946.5	OSBPL8	D30	D4	protein_coding	protein_coding	69.0378810000694	82.4976204343919	57.5943335620798	1.55551141382173	FALSE	0	NA	NA	no	no	no	TRUE
ENST00000567000.2	ORC6	D30	D4	protein_coding	retained_intron	89.1896728237401	53.2904250719747	105.67224721733	17.1841822514847	NA	0	0.220233	FALSE	NA	NA	NA	TRUE
ENST00000569239.5	ORC6	D30	D4	protein_coding	retained_intron	89.1896728237401	53.2904250719747	105.67224721733	27.4118322578266	NA	0	0.520053	TRUE	NA	NA	NA	TRUE
ENST00000284719.8	OLA1	D30	D4	protein_coding	protein_coding	180.198620315658	101.357564953297	202.169003063135	4.24772290181179	FALSE	0	0.999999	TRUE	yes	no	no	TRUE
ENST00000344357.9	OLA1	D30	D4	protein_coding	protein_coding	180.198620315658	101.357564953297	202.169003063135	71.7874529374878	FALSE	0	0.999874	TRUE	yes	no	no	TRUE
ENST00000392560.6	OLA1	D30	D4	protein_coding	processed_transcript	180.198620315658	101.357564953297	202.169003063135	72.6522719318476	NA	0	0.998297	TRUE	NA	NA	NA	TRUE
ENST00000262551.8	OGN	D30	D4	protein_coding	protein_coding	1.9569921955347	3.75359757963237	3.22667467241911	0.557086340193251	FALSE	0	0.999994	TRUE	yes	yes	no	TRUE
ENST00000349503.9	OGG1	D30	D4	protein_coding	protein_coding	12.1926109994147	9.78926945748936	15.1375445950572	1.09784718707168	FALSE	1	0.999999	TRUE	yes	no	no	TRUE
ENST00000444676.5	OGDH	D30	D4	protein_coding	protein_coding	20.393377684031	25.7010676057628	16.7115583146374	2.06256421599053	FALSE	0	1	TRUE	yes	no	no	TRUE
ENST00000373873.8	OBSL1	D30	D4	protein_coding	protein_coding	48.5735462458279	91.2201395381653	31.516880293702	13.2011054591868	FALSE	0	1	TRUE	yes	no	no	TRUE
ENST00000373876.5	OBSL1	D30	D4	protein_coding	protein_coding	48.5735462458279	91.2201395381653	31.516880293702	2.80575066656589	FALSE	0	1	TRUE	yes	no	no	TRUE
ENST00000462385.1	OBSL1	D30	D4	protein_coding	retained_intron	48.5735462458279	91.2201395381653	31.516880293702	1.10834254248893	NA	0	0.996526	TRUE	NA	NA	NA	TRUE
ENST00000465149.1	OBSL1	D30	D4	protein_coding	retained_intron	48.5735462458279	91.2201395381653	31.516880293702	4.47639494749542	NA	2	1	TRUE	NA	NA	NA	TRUE
ENST00000489804.5	OBSL1	D30	D4	protein_coding	retained_intron	48.5735462458279	91.2201395381653	31.516880293702	1.76088290686195	NA	0	0.305432	FALSE	NA	NA	NA	TRUE
ENST00000604031.5	OBSL1	D30	D4	protein_coding	protein_coding	48.5735462458279	91.2201395381653	31.516880293702	0.414107186498557	NA	0	1	TRUE	NA	NA	NA	TRUE
ENST00000680850.1	OBSCN	D30	D4	protein_coding	protein_coding	26.7730695346235	46.7181521262232	28.4581179211654	2.21010879176896	FALSE	0	1	TRUE	yes	no	yes	NA
ENST00000294172.7	NXF1	D30	D4	protein_coding	protein_coding	24.1285777079314	35.8106837802554	23.141153876867	8.44159000862263	FALSE	0	NA	NA	no	no	no	NA
ENST00000531709.6	NXF1	D30	D4	protein_coding	protein_coding	24.1285777079314	35.8106837802554	23.141153876867	2.43810067634418	TRUE	2	NA	NA	no	no	no	NA
ENST00000533440.1	NXF1	D30	D4	protein_coding	retained_intron	24.1285777079314	35.8106837802554	23.141153876867	1.23516912363627	NA	0	NA	NA	NA	NA	NA	NA
ENST00000374791.7	NTM	D30	D4	protein_coding	protein_coding	8.37997263583518	11.5340574042531	7.69738358941396	0.421532948672467	FALSE	1	0.999997	TRUE	yes	yes	no	TRUE
ENST00000427481.6	NTM	D30	D4	protein_coding	protein_coding	8.37997263583518	11.5340574042531	7.69738358941396	0.470272891617439	FALSE	1	0.888329	TRUE	yes	no	no	TRUE
ENST00000421281.1	NT5C2	D30	D4	protein_coding	protein_coding	69.5051074570145	69.2228807463262	39.6118020627114	8.68680230517547	NA	0	0.132397	FALSE	NA	NA	NA	TRUE
ENST00000674728.1	NT5C2	D30	D4	protein_coding	nonsense_mediated_decay	69.5051074570145	69.2228807463262	39.6118020627114	6.13777458331287	TRUE	2	0.999984	TRUE	yes	no	no	TRUE
ENST00000675985.1	NT5C2	D30	D4	protein_coding	protein_coding	69.5051074570145	69.2228807463262	39.6118020627114	1.7770599914754	FALSE	0	1	TRUE	yes	no	no	TRUE
ENST00000508896.6	NSD1	D30	D4	protein_coding	protein_coding	87.7449802279845	51.7817720096785	103.72789887656	17.7945221780124	FALSE	0	0.889963	TRUE	yes	no	yes	NA
ENST00000478013.1	NRP2	D30	D4	protein_coding	retained_intron	46.2024801724846	78.4845710232561	82.4564300517963	7.61988895059588	NA	0	0.134428	FALSE	NA	NA	NA	FALSE
ENST00000400202.5	NRIP1	D30	D4	protein_coding	protein_coding	28.8646246167856	30.1725009560629	37.249260838326	1.94916496692834	FALSE	0	1	TRUE	yes	no	yes	NA
ENST00000411932.1	NRIP1	D30	D4	protein_coding	protein_coding	28.8646246167856	30.1725009560629	37.249260838326	1.65880427909657	NA	0	0.0382314	FALSE	NA	NA	NA	NA
ENST00000518206.5	NRG1	D30	D4	protein_coding	protein_coding	8.60001406044258	4.72094905260009	18.3770711923324	1.11534864558663	NA	0	0.347049	FALSE	NA	NA	NA	TRUE
ENST00000650819.1	NRG1	D30	D4	protein_coding	protein_coding	8.60001406044258	4.72094905260009	18.3770711923324	0.425347124076058	FALSE	0	1	TRUE	yes	no	yes	TRUE
ENST00000650919.1	NRG1	D30	D4	protein_coding	protein_coding	8.60001406044258	4.72094905260009	18.3770711923324	1.33190869846004	FALSE	0	0.996526	TRUE	yes	no	yes	TRUE
ENST00000650980.1	NRG1	D30	D4	protein_coding	protein_coding	8.60001406044258	4.72094905260009	18.3770711923324	0.588648581613038	FALSE	0	1	TRUE	yes	no	yes	TRUE
ENST00000652698.1	NRG1	D30	D4	protein_coding	protein_coding	8.60001406044258	4.72094905260009	18.3770711923324	0.445576627215179	FALSE	0	1	TRUE	yes	no	yes	TRUE
ENST00000393102.7	NR2C2	D30	D4	protein_coding	protein_coding	23.3828558016733	17.6775728186709	26.2718650530868	2.60300372955719	FALSE	0	1	TRUE	yes	no	no	NA
ENST00000561898.1	NPTN	D30	D4	protein_coding	retained_intron	143.589930491526	204.978203414814	109.510351913558	23.5210846475783	NA	0	0.0370051	FALSE	NA	NA	NA	TRUE
ENST00000565325.5	NPTN	D30	D4	protein_coding	protein_coding	143.589930491526	204.978203414814	109.510351913558	26.8063137081908	FALSE	0	0.998436	TRUE	yes	yes	no	TRUE
ENST00000280749.5	NOPCHAP1	D30	D4	protein_coding	protein_coding	28.9944373961298	14.097816513043	26.3408777811543	11.3547562180378	NA	0	0.163525	FALSE	NA	NA	NA	TRUE
ENST00000418921.1	NONO	D30	D4	protein_coding	protein_coding	1058.24146051578	332.766117850596	1367.76229173747	109.996676994901	NA	0	0.272273	FALSE	NA	NA	NA	TRUE
ENST00000677245.1	NONO	D30	D4	protein_coding	nonsense_mediated_decay	1058.24146051578	332.766117850596	1367.76229173747	12.1192778471311	NA	3	0.494202	FALSE	NA	NA	NA	TRUE
ENST00000513560.7	NNT-AS1	D30	D4	lncRNA	lncRNA	18.1464302276258	24.8225552917782	16.5689385886526	5.67075099265158	NA	0	0.0441808	FALSE	NA	NA	NA	FALSE
ENST00000606697.5	NNT-AS1	D30	D4	lncRNA	lncRNA	18.1464302276258	24.8225552917782	16.5689385886526	11.3286709411032	NA	0	0.0942086	FALSE	NA	NA	NA	FALSE
ENST00000264663.9	NNT	D30	D4	protein_coding	protein_coding	51.2315662660509	122.221162948743	25.4595097886747	4.77581560257762	FALSE	0	1	TRUE	yes	no	no	FALSE
ENST00000388759.7	NKIRAS1	D30	D4	protein_coding	protein_coding	10.4387852313481	16.6160873275477	9.18157713363455	0.513162895429931	FALSE	0	0.996826	TRUE	yes	no	no	FALSE
ENST00000415901.6	NKIRAS1	D30	D4	protein_coding	protein_coding	10.4387852313481	16.6160873275477	9.18157713363455	1.61257185117704	FALSE	0	0.997331	TRUE	yes	no	no	FALSE
ENST00000421515.6	NKIRAS1	D30	D4	protein_coding	protein_coding	10.4387852313481	16.6160873275477	9.18157713363455	0.287220608467546	FALSE	0	0.996483	TRUE	yes	no	no	FALSE
ENST00000425478.7	NKIRAS1	D30	D4	protein_coding	protein_coding	10.4387852313481	16.6160873275477	9.18157713363455	2.95949166516826	FALSE	0	0.969286	TRUE	yes	no	no	FALSE
ENST00000503274.1	NIPBL	D30	D4	protein_coding	processed_transcript	36.8865233212482	28.48010554326	44.4412374012749	1.54312874156587	NA	0	0.0953979	FALSE	NA	NA	NA	NA
ENST00000513819.1	NIPBL	D30	D4	protein_coding	protein_coding	36.8865233212482	28.48010554326	44.4412374012749	4.17902183248718	NA	0	0.126263	FALSE	NA	NA	NA	NA
ENST00000632230.1	NHSL2	D30	D4	protein_coding	protein_coding	2.34136316911704	1.67816535413868	3.66976310722621	0.0694081181002498	FALSE	0	0.999956	TRUE	yes	no	yes	NA
ENST00000543693.5	NFIB	D30	D4	protein_coding	protein_coding	10.6882400427071	31.0232228078145	2.35940738405918	1.07002546912064	FALSE	0	0.99849	TRUE	yes	no	yes	NA
ENST00000330010.12	NEXN	D30	D4	protein_coding	protein_coding	58.5038775472479	162.007092497396	7.67402995326654	1.11052788516145	FALSE	1	1	TRUE	yes	no	yes	TRUE
ENST00000342754.5	NEXN	D30	D4	protein_coding	protein_coding	58.5038775472479	162.007092497396	7.67402995326654	7.79155001663188	NA	0	1	TRUE	NA	NA	NA	TRUE
ENST00000440324.5	NEXN	D30	D4	protein_coding	protein_coding	58.5038775472479	162.007092497396	7.67402995326654	21.6474448058487	FALSE	0	0.908941	TRUE	no	no	yes	TRUE
ENST00000464363.5	NELFCD	D30	D4	protein_coding	retained_intron	22.0745319853117	20.9819083543295	18.7945302274863	0.367666175980944	NA	1	NA	NA	NA	NA	NA	FALSE
ENST00000478389.5	NELFCD	D30	D4	protein_coding	retained_intron	22.0745319853117	20.9819083543295	18.7945302274863	1.88289339003273	NA	5	NA	NA	NA	NA	NA	FALSE
ENST00000602795.6	NELFCD	D30	D4	protein_coding	protein_coding	22.0745319853117	20.9819083543295	18.7945302274863	2.87821157597223	FALSE	1	NA	NA	no	no	no	FALSE
ENST00000652272.2	NELFCD	D30	D4	protein_coding	protein_coding	22.0745319853117	20.9819083543295	18.7945302274863	4.17778501652516	FALSE	1	NA	NA	no	no	no	FALSE
ENST00000555405.5	NEK9	D30	D4	protein_coding	retained_intron	26.1613571422514	27.2546273321195	28.133803824155	2.67822545192068	NA	0	NA	NA	NA	NA	NA	NA
ENST00000377122.9	NEBL	D30	D4	protein_coding	protein_coding	325.70512327411	934.742959779345	49.900261077391	95.2270581546496	FALSE	0	1	TRUE	yes	no	yes	TRUE
ENST00000417816.2	NEBL	D30	D4	protein_coding	protein_coding	325.70512327411	934.742959779345	49.900261077391	0.48065031408069	FALSE	0	0.99793	TRUE	yes	no	no	TRUE
ENST00000482754.1	NEBL	D30	D4	protein_coding	retained_intron	325.70512327411	934.742959779345	49.900261077391	27.9836406112817	NA	0	0.0249109	FALSE	NA	NA	NA	TRUE
ENST00000485750.1	NEBL	D30	D4	protein_coding	processed_transcript	325.70512327411	934.742959779345	49.900261077391	0.554735442474423	NA	0	0.0176252	FALSE	NA	NA	NA	TRUE
ENST00000493005.5	NEBL	D30	D4	protein_coding	retained_intron	325.70512327411	934.742959779345	49.900261077391	61.852221469537	NA	0	0.999832	TRUE	NA	NA	NA	TRUE
ENST00000674540.1	NEBL	D30	D4	protein_coding	processed_transcript	325.70512327411	934.742959779345	49.900261077391	2.93341601873061	NA	0	0.99977	TRUE	NA	NA	NA	TRUE
ENST00000675702.1	NEBL	D30	D4	protein_coding	processed_transcript	325.70512327411	934.742959779345	49.900261077391	3.39735908078437	NA	0	0.983159	TRUE	NA	NA	NA	TRUE
ENST00000675747.1	NEBL	D30	D4	protein_coding	retained_intron	325.70512327411	934.742959779345	49.900261077391	7.70474068157469	NA	0	1	TRUE	NA	NA	NA	TRUE
ENST00000396655.6	NDUFA9	D30	D4	protein_coding	retained_intron	23.3294686930561	45.7672875119151	13.3821398134943	1.12679684295831	NA	0	0.999759	TRUE	NA	NA	NA	FALSE
ENST00000535726.5	NDUFA9	D30	D4	protein_coding	retained_intron	23.3294686930561	45.7672875119151	13.3821398134943	10.0739047900506	NA	0	0.0232156	FALSE	NA	NA	NA	FALSE
ENST00000674521.1	NDRG1	D30	D4	protein_coding	nonsense_mediated_decay	51.5897312963844	111.352551222074	24.1764239233139	1.12538384400444	NA	0	0.00271879	FALSE	NA	NA	NA	NA
ENST00000430580.6	NBPF1	D30	D4	protein_coding	protein_coding	32.7934278908979	26.4150990086018	47.0302764323602	7.13888504688318	FALSE	0	NA	NA	no	no	no	NA
ENST00000397909.7	NAV3	D30	D4	protein_coding	protein_coding	10.6892001852057	16.0818653080203	10.5776377947258	0.401560373202396	FALSE	0	1	TRUE	yes	no	yes	TRUE
ENST00000536525.6	NAV3	D30	D4	protein_coding	protein_coding	10.6892001852057	16.0818653080203	10.5776377947258	0.175830228781825	FALSE	0	1	TRUE	yes	no	yes	TRUE
ENST00000549369.5	NAV3	D30	D4	protein_coding	processed_transcript	10.6892001852057	16.0818653080203	10.5776377947258	8.12801564992544	NA	0	0.0121008	FALSE	NA	NA	NA	TRUE
ENST00000550042.2	NAV3	D30	D4	protein_coding	protein_coding	10.6892001852057	16.0818653080203	10.5776377947258	0.79060828075199	FALSE	0	0.650704	TRUE	yes	no	yes	TRUE
ENST00000396085.6	NAV2	D30	D4	protein_coding	protein_coding	17.7199469382796	25.9478763961244	16.6374677199914	0.835535120787006	FALSE	0	1	TRUE	yes	no	yes	NA
ENST00000525515.5	NASP	D30	D4	protein_coding	protein_coding	793.383120266327	202.444634981077	657.637410864025	8.38885860519289	NA	0	0.238277	FALSE	NA	NA	NA	NA
ENST00000380542.9	NAP1L4	D30	D4	protein_coding	protein_coding	187.164478128014	130.735451227583	185.261246987894	12.2532653801573	FALSE	2	1	TRUE	yes	no	yes	NA
ENST00000526842.5	NAP1L4	D30	D4	protein_coding	protein_coding	187.164478128014	130.735451227583	185.261246987894	43.3359826779631	NA	0	0.0984294	FALSE	NA	NA	NA	NA
ENST00000489299.5	NAALADL2	D30	D4	protein_coding	processed_transcript	4.98091212856125	10.1587239526978	5.25916964476327	0.156175990280915	NA	0	1	TRUE	NA	NA	NA	FALSE
ENST00000489729.5	NAALADL2	D30	D4	protein_coding	processed_transcript	4.98091212856125	10.1587239526978	5.25916964476327	0.366549782204271	NA	0	0.102247	FALSE	NA	NA	NA	FALSE
ENST00000477813.5	NAA50	D30	D4	protein_coding	protein_coding	75.273126162633	34.5961569194626	52.6998242480586	10.0390928012279	FALSE	0	NA	NA	no	no	no	NA
ENST00000504114.5	N4BP2L2	D30	D4	protein_coding	protein_coding	147.279468304825	191.504476273408	138.873241177639	4.96376338129867	FALSE	0	1	TRUE	no	no	yes	NA
ENST00000674422.1	N4BP2L2	D30	D4	protein_coding	protein_coding	147.279468304825	191.504476273408	138.873241177639	4.66248784206661	FALSE	0	0.999987	TRUE	yes	no	yes	NA
ENST00000511480.5	N4BP2	D30	D4	protein_coding	nonsense_mediated_decay	33.6813080164897	19.5547969242917	31.811575312925	3.37397903045517	TRUE	1	1	TRUE	no	no	no	TRUE
ENST00000359263.9	MYOF	D30	D4	protein_coding	protein_coding	8.76863302792683	22.7612515011246	11.6720042356509	4.86075221884684	FALSE	0	1	TRUE	yes	no	yes	TRUE
ENST00000356338.11	MYO5A	D30	D4	protein_coding	protein_coding	21.5500406210312	20.0813046940473	15.163600912219	0.461700788041173	FALSE	0	NA	NA	no	no	no	NA
ENST00000399231.8	MYO5A	D30	D4	protein_coding	protein_coding	21.5500406210312	20.0813046940473	15.163600912219	2.03696672571655	FALSE	0	NA	NA	no	no	no	NA
ENST00000556196.6	MYO5A	D30	D4	protein_coding	nonsense_mediated_decay	21.5500406210312	20.0813046940473	15.163600912219	1.13321835641101	TRUE	0	NA	NA	no	no	no	NA
ENST00000687574.1	MYO5A	D30	D4	protein_coding	protein_coding	21.5500406210312	20.0813046940473	15.163600912219	0.290318278180484	FALSE	0	NA	NA	no	no	no	NA
ENST00000687968.1	MYO5A	D30	D4	protein_coding	nonsense_mediated_decay	21.5500406210312	20.0813046940473	15.163600912219	0.54315301618552	TRUE	0	NA	NA	no	no	no	NA
ENST00000530254.6	MYO18A	D30	D4	protein_coding	nonsense_mediated_decay	110.423299186074	192.603394874292	26.4367020211159	9.10324778744855	NA	0	1	TRUE	NA	NA	NA	TRUE
ENST00000531253.5	MYO18A	D30	D4	protein_coding	protein_coding	110.423299186074	192.603394874292	26.4367020211159	3.11132490310494	FALSE	0	1	TRUE	yes	no	yes	TRUE
ENST00000531267.5	MYO18A	D30	D4	protein_coding	processed_transcript	110.423299186074	192.603394874292	26.4367020211159	5.82338276837381	NA	0	0.0421275	FALSE	NA	NA	NA	TRUE
ENST00000531892.5	MYO18A	D30	D4	protein_coding	processed_transcript	110.423299186074	192.603394874292	26.4367020211159	60.9448956203393	NA	0	0.336292	FALSE	NA	NA	NA	TRUE
ENST00000533420.3	MYO18A	D30	D4	protein_coding	protein_coding	110.423299186074	192.603394874292	26.4367020211159	2.89324852606025	FALSE	0	0.70134	TRUE	no	no	yes	TRUE
ENST00000636100.1	MYO18A	D30	D4	protein_coding	protein_coding	110.423299186074	192.603394874292	26.4367020211159	6.63196409008046	NA	0	0.995979	TRUE	NA	NA	NA	TRUE
ENST00000547649.5	MYL6	D30	D4	protein_coding	protein_coding	967.155875817983	1826.29302168043	546.083189244751	102.806757460857	FALSE	1	0.990756	TRUE	no	no	no	TRUE
ENST00000547703.5	MYL6	D30	D4	protein_coding	retained_intron	967.155875817983	1826.29302168043	546.083189244751	71.5340366775351	NA	2	0.39473	FALSE	NA	NA	NA	TRUE
ENST00000550639.1	MYL6	D30	D4	protein_coding	processed_transcript	967.155875817983	1826.29302168043	546.083189244751	23.5378037607463	NA	1	0.033378	FALSE	NA	NA	NA	TRUE
ENST00000292327.6	MYL3	D30	D4	protein_coding	protein_coding	378.421652225608	1224.03378554313	2.80850498855322	362.346908753572	FALSE	0	0.999288	TRUE	no	no	yes	TRUE
ENST00000431168.1	MYL3	D30	D4	protein_coding	protein_coding	378.421652225608	1224.03378554313	2.80850498855322	1.22666351592719	NA	0	0.032447	FALSE	NA	NA	NA	TRUE
ENST00000654597.1	MYL3	D30	D4	protein_coding	protein_coding	378.421652225608	1224.03378554313	2.80850498855322	0.138464607402036	FALSE	0	0.998809	TRUE	no	no	yes	TRUE
ENST00000662933.1	MYL3	D30	D4	protein_coding	protein_coding	378.421652225608	1224.03378554313	2.80850498855322	0.0815768612465133	FALSE	0	0.999134	TRUE	no	no	yes	TRUE
ENST00000576164.6	MYH11	D30	D4	protein_coding	retained_intron	2.81868984647559	8.45266977960979	1.25194214825319	0.118763257754109	NA	3	NA	NA	NA	NA	NA	TRUE
ENST00000476718.1	MXRA8	D30	D4	protein_coding	retained_intron	16.890121215867	30.5577613856125	31.9005419285181	4.93148315783958	NA	1	NA	NA	NA	NA	NA	TRUE
ENST00000566859.5	MVP	D30	D4	protein_coding	nonsense_mediated_decay	7.7034725327527	17.0173912901401	2.46523155935065	0.560297674141684	NA	0	0.22242	FALSE	NA	NA	NA	TRUE
ENST00000569612.1	MVP	D30	D4	protein_coding	retained_intron	7.7034725327527	17.0173912901401	2.46523155935065	0.639866719065585	NA	1	0.0556932	FALSE	NA	NA	NA	TRUE
ENST00000297488.10	MTUS1	D30	D4	protein_coding	protein_coding	17.2604892236889	59.1387315660512	1.34181123247738	5.12206552575348	FALSE	0	1	TRUE	no	no	yes	TRUE
ENST00000366576.3	MTR	D30	D4	protein_coding	protein_coding	36.3807060395108	58.0300660905862	30.3585994098345	4.62073935034053	FALSE	0	NA	NA	no	no	no	TRUE
ENST00000679569.1	MTR	D30	D4	protein_coding	retained_intron	36.3807060395108	58.0300660905862	30.3585994098345	1.24804331185138	NA	1	NA	NA	NA	NA	NA	TRUE
ENST00000438018.5	MTMR1	D30	D4	protein_coding	protein_coding	12.8525061793099	23.5847526931702	9.47623980867353	2.79498960942318	NA	0	0.0399362	FALSE	NA	NA	NA	TRUE
ENST00000542156.5	MTMR1	D30	D4	protein_coding	protein_coding	12.8525061793099	23.5847526931702	9.47623980867353	2.92119185550214	FALSE	0	1	TRUE	yes	no	yes	TRUE
ENST00000376592.6	MTHFR	D30	D4	protein_coding	protein_coding	7.06590136781193	10.6494137811596	5.31004068374816	0.527518607423627	FALSE	2	1	TRUE	yes	no	yes	TRUE
ENST00000650853.1	MTHFD1	D30	D4	protein_coding	retained_intron	140.136736151028	37.1124929513816	120.357089293385	2.98969447434837	NA	1	1	TRUE	NA	NA	NA	NA
ENST00000652179.1	MTHFD1	D30	D4	protein_coding	protein_coding	140.136736151028	37.1124929513816	120.357089293385	1.22284449763375	TRUE	0	1	TRUE	yes	no	no	NA
ENST00000370298.9	MTF2	D30	D4	protein_coding	protein_coding	100.030528316535	52.8591824577024	101.871760934013	9.97968476432621	FALSE	1	1	TRUE	yes	no	yes	TRUE
ENST00000302503.8	MTCH2	D30	D4	protein_coding	protein_coding	87.54424011818	67.0802215349462	70.1142591890647	19.4055997099072	FALSE	0	0.999943	TRUE	yes	no	no	NA
ENST00000530428.1	MTCH2	D30	D4	protein_coding	protein_coding	87.54424011818	67.0802215349462	70.1142591890647	6.81361449218501	NA	0	0.388449	FALSE	NA	NA	NA	NA
ENST00000496078.1	MTARC2	D30	D4	protein_coding	processed_transcript	10.9681071482748	20.1358518603893	3.69362951892182	2.01834940000006	NA	0	0.0033699	FALSE	NA	NA	NA	TRUE
ENST00000406911.5	MTA3	D30	D4	protein_coding	protein_coding	73.0076876308042	28.0088642627397	99.8509997612927	14.306193373842	FALSE	0	1	TRUE	yes	no	yes	TRUE
ENST00000491314.1	MTA3	D30	D4	protein_coding	processed_transcript	73.0076876308042	28.0088642627397	99.8509997612927	0.831863165746919	NA	0	0.0264114	FALSE	NA	NA	NA	TRUE
ENST00000484269.5	MST1	D30	D4	protein_coding	retained_intron	7.28403913454335	9.82312892512798	10.3384011674541	0.174635170818814	NA	1	0.22746	FALSE	NA	NA	NA	NA
ENST00000492329.5	MST1	D30	D4	protein_coding	retained_intron	7.28403913454335	9.82312892512798	10.3384011674541	0.315770017872952	NA	3	0.995978	TRUE	NA	NA	NA	NA
ENST00000493836.5	MST1	D30	D4	protein_coding	retained_intron	7.28403913454335	9.82312892512798	10.3384011674541	0.281256725185361	NA	1	0.135541	FALSE	NA	NA	NA	NA
ENST00000670357.1	MSH3	D30	D4	protein_coding	nonsense_mediated_decay	21.7509407081222	13.9805484800256	21.3511451425506	4.7562359484579	TRUE	0	1	TRUE	yes	no	yes	TRUE
ENST00000461916.5	MRPS5	D30	D4	protein_coding	retained_intron	54.6870802036214	51.624820220554	45.8602437071619	5.0775884759067	NA	0	NA	NA	NA	NA	NA	TRUE
ENST00000259873.5	MRPS18B	D30	D4	protein_coding	protein_coding	36.1989081107487	32.0534905875857	35.9818685236903	30.0780573517786	FALSE	0	NA	NA	no	no	no	TRUE
ENST00000492316.5	MRPS18B	D30	D4	protein_coding	retained_intron	36.1989081107487	32.0534905875857	35.9818685236903	5.92372970892956	NA	0	NA	NA	NA	NA	NA	TRUE
ENST00000477371.5	MRPL38	D30	D4	protein_coding	retained_intron	10.3971424159975	10.1711146726861	8.79443726608303	0.565177477277095	NA	0	NA	NA	NA	NA	NA	TRUE
ENST00000369645.6	MOV10	D30	D4	protein_coding	protein_coding	15.1911572047814	12.3687162733259	15.9812397983417	1.37628006123547	FALSE	2	1	TRUE	yes	no	no	TRUE
ENST00000494319.1	MOV10	D30	D4	protein_coding	processed_transcript	15.1911572047814	12.3687162733259	15.9812397983417	0.769708485978401	NA	1	0.0167142	FALSE	NA	NA	NA	TRUE
ENST00000687509.1	MOV10	D30	D4	protein_coding	retained_intron	15.1911572047814	12.3687162733259	15.9812397983417	1.08129517252543	NA	2	1	TRUE	NA	NA	NA	TRUE
ENST00000520266.5	MOK	D30	D4	protein_coding	processed_transcript	19.4251893028183	19.8782828199109	44.5458678131514	0.308330966710069	NA	1	NA	NA	NA	NA	NA	NA
ENST00000522534.5	MOK	D30	D4	protein_coding	protein_coding	19.4251893028183	19.8782828199109	44.5458678131514	0.937222477507833	FALSE	1	NA	NA	no	no	no	NA
ENST00000559138.5	MOK	D30	D4	protein_coding	nonsense_mediated_decay	19.4251893028183	19.8782828199109	44.5458678131514	1.78297635779538	TRUE	1	NA	NA	no	no	no	NA
ENST00000612066.1	MLLT6	D30	D4	protein_coding	retained_intron	31.4119921608669	45.0162143905688	23.1502379182078	8.2665243267584	NA	0	0.0146089	FALSE	NA	NA	NA	TRUE
ENST00000352241.9	MITF	D30	D4	protein_coding	protein_coding	30.4561719675904	92.5291779110067	2.07146317037605	3.92962292874224	FALSE	0	1	TRUE	yes	no	yes	TRUE
ENST00000505215.2	MIR302CHG	D30	D4	lncRNA	lncRNA	263.633338559484	3.52473337111944	240.84098189465	109.604423628724	NA	0	0.00883029	FALSE	NA	NA	NA	TRUE
ENST00000577659.2	MIR133A1HG	D30	D4	lncRNA	lncRNA	29.1875663223347	88.6529912326559	1.16529050266602	5.56475794115412	NA	0	0.136904	FALSE	NA	NA	NA	TRUE
ENST00000524376.1	MIR100HG	D30	D4	lncRNA	lncRNA	23.121102968772	96.6366013095517	2.85948314846584	4.4736415839286	NA	0	0.0278019	FALSE	NA	NA	NA	FALSE
ENST00000533109.6	MIR100HG	D30	D4	lncRNA	lncRNA	23.121102968772	96.6366013095517	2.85948314846584	0.0893474041213917	NA	0	0.0262624	FALSE	NA	NA	NA	FALSE
ENST00000534297.2	MIR100HG	D30	D4	lncRNA	lncRNA	23.121102968772	96.6366013095517	2.85948314846584	0.835212511319429	NA	0	0.0411318	FALSE	NA	NA	NA	FALSE
ENST00000647967.1	MIR100HG	D30	D4	lncRNA	lncRNA	23.121102968772	96.6366013095517	2.85948314846584	0.782033909643207	NA	0	0.0492469	FALSE	NA	NA	NA	FALSE
ENST00000656868.1	MIR100HG	D30	D4	lncRNA	lncRNA	23.121102968772	96.6366013095517	2.85948314846584	1.16492106937841	NA	0	0.0236597	FALSE	NA	NA	NA	FALSE
ENST00000669993.1	MIR100HG	D30	D4	lncRNA	lncRNA	23.121102968772	96.6366013095517	2.85948314846584	0.1607247452114	NA	0	0.0303765	FALSE	NA	NA	NA	FALSE
ENST00000686772.1	MIR100HG	D30	D4	lncRNA	lncRNA	23.121102968772	96.6366013095517	2.85948314846584	0.0312582978009323	NA	0	NA	NA	NA	NA	NA	FALSE
ENST00000361936.9	MINDY1	D30	D4	protein_coding	protein_coding	4.76766129879376	9.10594968692848	3.62002169222449	1.94719885982997	FALSE	0	1	TRUE	yes	no	yes	TRUE
ENST00000453318.6	MID1	D30	D4	protein_coding	protein_coding	32.8956622191202	40.132636258262	38.7809863280517	2.43671015307044	FALSE	0	1	TRUE	yes	no	no	NA
ENST00000252134.11	MICAL3	D30	D4	protein_coding	retained_intron	29.0081793183696	61.3318656037712	8.54286182448788	1.47823768202318	NA	0	0.868591	TRUE	NA	NA	NA	TRUE
ENST00000495076.5	MICAL3	D30	D4	protein_coding	nonsense_mediated_decay	29.0081793183696	61.3318656037712	8.54286182448788	0.886177521959588	TRUE	0	1	TRUE	yes	no	no	TRUE
ENST00000498573.5	MICAL3	D30	D4	protein_coding	protein_coding	29.0081793183696	61.3318656037712	8.54286182448788	2.3003200715846	NA	0	0.201417	FALSE	NA	NA	NA	TRUE
ENST00000577821.5	MICAL3	D30	D4	protein_coding	protein_coding	29.0081793183696	61.3318656037712	8.54286182448788	2.16240763643551	NA	0	0.0304206	FALSE	NA	NA	NA	TRUE
ENST00000578984.1	MICAL3	D30	D4	protein_coding	protein_coding	29.0081793183696	61.3318656037712	8.54286182448788	2.23953999744761	NA	0	0.187335	FALSE	NA	NA	NA	TRUE
ENST00000585038.1	MICAL3	D30	D4	protein_coding	protein_coding	29.0081793183696	61.3318656037712	8.54286182448788	1.75502119835479	FALSE	0	1	TRUE	yes	no	yes	TRUE
ENST00000527546.5	MICAL2	D30	D4	protein_coding	protein_coding	41.8869853951472	124.182424156844	14.1051583918295	0.26898116155454	FALSE	0	1	TRUE	yes	no	yes	NA
ENST00000348007.7	MIA2	D30	D4	protein_coding	protein_coding	16.61282029082	23.2364816802996	13.8935763896969	7.93674189201737	FALSE	0	1	TRUE	no	no	yes	TRUE
ENST00000556148.5	MIA2	D30	D4	protein_coding	protein_coding	16.61282029082	23.2364816802996	13.8935763896969	1.61204018896988	FALSE	0	1	TRUE	no	no	yes	TRUE
ENST00000336509.8	MFSD11	D30	D4	protein_coding	protein_coding	20.2398106687677	22.7570890997175	21.3178391135238	0.72629952752143	FALSE	0	1	TRUE	yes	no	no	NA
ENST00000588768.5	MFSD11	D30	D4	protein_coding	nonsense_mediated_decay	20.2398106687677	22.7570890997175	21.3178391135238	0.752291100334218	NA	0	0.217369	FALSE	NA	NA	NA	NA
ENST00000675374.1	MFN2	D30	D4	protein_coding	retained_intron	58.3303724721444	101.821855361181	43.6257547742857	1.74278251581442	NA	1	0.993891	TRUE	NA	NA	NA	TRUE
ENST00000676369.1	MFN2	D30	D4	protein_coding	protein_coding	58.3303724721444	101.821855361181	43.6257547742857	1.86111187301336	NA	0	0.112487	FALSE	NA	NA	NA	TRUE
ENST00000304593.14	MFF	D30	D4	protein_coding	protein_coding	75.1645580706645	62.4467471680316	67.1475078210173	4.45115699172377	FALSE	0	0.999996	TRUE	yes	no	yes	TRUE
ENST00000337110.11	MFF	D30	D4	protein_coding	protein_coding	75.1645580706645	62.4467471680316	67.1475078210173	2.25930535668627	FALSE	0	0.999897	TRUE	yes	no	yes	TRUE
ENST00000354503.10	MFF	D30	D4	protein_coding	protein_coding	75.1645580706645	62.4467471680316	67.1475078210173	38.534841957097	FALSE	0	0.999792	TRUE	yes	no	no	TRUE
ENST00000262432.13	METTL2B	D30	D4	protein_coding	protein_coding	17.1979869985745	11.6432554082725	18.1652493794628	6.58259663113118	FALSE	1	0.999999	TRUE	yes	no	no	TRUE
ENST00000547357.5	METTL25	D30	D4	protein_coding	processed_transcript	10.112209524823	15.0408493797722	10.3852217016877	1.17108956713512	NA	1	1	TRUE	NA	NA	NA	TRUE
ENST00000272839.7	METTL21A	D30	D4	protein_coding	protein_coding	28.6732814004301	18.5324205206798	22.1572799157029	0.544141477467214	FALSE	0	0.999904	TRUE	yes	no	no	TRUE
ENST00000406927.6	METTL21A	D30	D4	protein_coding	protein_coding	28.6732814004301	18.5324205206798	22.1572799157029	8.22625203275239	FALSE	0	0.999722	TRUE	yes	no	no	TRUE
ENST00000368060.7	MED23	D30	D4	protein_coding	protein_coding	20.5104555032162	23.0104683267236	20.1591209557282	0.997480045611378	FALSE	0	1	TRUE	yes	no	no	NA
ENST00000484885.1	MED23	D30	D4	protein_coding	processed_transcript	20.5104555032162	23.0104683267236	20.1591209557282	2.24694750386523	NA	0	0.0239155	FALSE	NA	NA	NA	NA
ENST00000395569.8	MDK	D30	D4	protein_coding	protein_coding	281.843395062598	118.389066788038	464.719913962879	86.5974629545391	NA	0	0.470102	FALSE	NA	NA	NA	TRUE
ENST00000405308.6	MDK	D30	D4	protein_coding	protein_coding	281.843395062598	118.389066788038	464.719913962879	4.59194891045238	FALSE	0	0.773446	TRUE	yes	yes	no	TRUE
ENST00000407067.1	MDK	D30	D4	protein_coding	protein_coding	281.843395062598	118.389066788038	464.719913962879	2.66267829473069	FALSE	1	0.730869	TRUE	yes	yes	no	TRUE
ENST00000409207.5	MCFD2	D30	D4	protein_coding	protein_coding	73.3359936008715	54.2945882881603	66.0140454397467	6.11742222431504	FALSE	0	0.986468	TRUE	yes	yes	yes	TRUE
ENST00000461074.1	MCF2L2	D30	D4	protein_coding	retained_intron	7.81300503409457	3.76976443790365	14.323632753196	0.681747891815491	NA	0	0.578398	TRUE	NA	NA	NA	TRUE
ENST00000282488.11	MBNL1	D30	D4	protein_coding	protein_coding	22.7890278937788	72.2070618926503	3.63712485379235	0.057428919144226	FALSE	0	0.999972	TRUE	yes	no	no	NA
ENST00000256429.8	MBD2	D30	D4	protein_coding	protein_coding	22.0266264566997	24.4618861149418	18.2793836022917	2.35162781240977	FALSE	0	0.999973	TRUE	yes	no	yes	TRUE
ENST00000398398.6	MBD2	D30	D4	protein_coding	protein_coding	22.0266264566997	24.4618861149418	18.2793836022917	6.8354291701496	FALSE	0	0.857516	TRUE	yes	no	yes	TRUE
ENST00000578272.1	MBD2	D30	D4	protein_coding	nonsense_mediated_decay	22.0266264566997	24.4618861149418	18.2793836022917	3.53719486916137	TRUE	0	0.861475	TRUE	yes	no	yes	TRUE
ENST00000583046.1	MBD2	D30	D4	protein_coding	protein_coding	22.0266264566997	24.4618861149418	18.2793836022917	9.30237460497892	FALSE	0	0.990865	TRUE	yes	no	yes	TRUE
ENST00000372008.6	MAST2	D30	D4	protein_coding	protein_coding	15.1732269688179	15.0412397128422	13.2926306443249	1.4643416687874	FALSE	0	0.99991	TRUE	yes	no	yes	TRUE
ENST00000482881.1	MAST2	D30	D4	protein_coding	retained_intron	15.1732269688179	15.0412397128422	13.2926306443249	2.92068029172152	NA	0	0.5	TRUE	NA	NA	NA	TRUE
ENST00000674079.1	MAST2	D30	D4	protein_coding	protein_coding	15.1732269688179	15.0412397128422	13.2926306443249	3.1152793870205	FALSE	0	1	TRUE	yes	no	yes	TRUE
ENST00000561314.6	MARK3	D30	D4	protein_coding	protein_coding	57.6114381498647	55.8569910380603	53.5595301305388	3.06425908367176	FALSE	0	1	TRUE	yes	no	yes	NA
ENST00000676694.1	MARK3	D30	D4	protein_coding	nonsense_mediated_decay	57.6114381498647	55.8569910380603	53.5595301305388	3.07230032005893	TRUE	1	1	TRUE	no	no	yes	NA
ENST00000678022.1	MARK3	D30	D4	protein_coding	nonsense_mediated_decay	57.6114381498647	55.8569910380603	53.5595301305388	0.730054790829111	TRUE	1	1	TRUE	no	no	yes	NA
ENST00000609983.1	MAPKAPK5-AS1	D30	D4	lncRNA	lncRNA	39.5935594330533	24.4912392141574	34.6074878845503	4.91159883711307	NA	1	0.167643	FALSE	NA	NA	NA	TRUE
ENST00000656209.1	MAPKAPK5-AS1	D30	D4	lncRNA	lncRNA	39.5935594330533	24.4912392141574	34.6074878845503	3.81179222948896	NA	2	0.103696	FALSE	NA	NA	NA	TRUE
ENST00000641858.1	MAPK10	D30	D4	protein_coding	protein_coding	39.5578413780423	26.3146972498945	80.0634027565296	1.99788962370795	FALSE	0	NA	NA	no	no	no	NA
ENST00000641881.1	MAPK10	D30	D4	protein_coding	protein_coding	39.5578413780423	26.3146972498945	80.0634027565296	1.15386779110994	FALSE	0	NA	NA	no	no	no	NA
ENST00000324219.9	MAP4K4	D30	D4	protein_coding	protein_coding	109.478449209571	113.740267875997	82.5813693743323	9.6024488088972	FALSE	0	1	TRUE	yes	no	yes	TRUE
ENST00000418101.1	MAP4K4	D30	D4	protein_coding	protein_coding	109.478449209571	113.740267875997	82.5813693743323	2.41226200383274	NA	0	0.205161	FALSE	NA	NA	NA	TRUE
ENST00000476609.1	MAP4K4	D30	D4	protein_coding	retained_intron	109.478449209571	113.740267875997	82.5813693743323	1.84724412860537	NA	1	1	TRUE	NA	NA	NA	TRUE
ENST00000634702.1	MAP4K4	D30	D4	protein_coding	protein_coding	109.478449209571	113.740267875997	82.5813693743323	15.4019827928408	FALSE	0	1	TRUE	yes	no	yes	TRUE
ENST00000449569.6	MAP4K3-DT	D30	D4	lncRNA	lncRNA	9.02846842313349	14.2988859750855	5.30023571356461	0.463645058354205	NA	0	0.0430641	FALSE	NA	NA	NA	NA
ENST00000366920.6	MAP3K4	D30	D4	protein_coding	protein_coding	58.7537404974867	33.6523856136805	61.1921175754099	15.4912822351532	FALSE	0	1	TRUE	yes	no	yes	TRUE
ENST00000338983.7	MAP3K20	D30	D4	protein_coding	protein_coding	32.5906170038651	72.3356585211676	12.2766606009205	21.5261438153006	FALSE	0	1	TRUE	yes	no	yes	TRUE
ENST00000375213.8	MAP3K20	D30	D4	protein_coding	protein_coding	32.5906170038651	72.3356585211676	12.2766606009205	1.31905968159807	FALSE	0	1	TRUE	yes	no	yes	TRUE
[truncated: 850 more rows]

## Sheet: Supplemental Table S2
Supplemental Table S2. Differentially expressed genes (DGE) across developmental time points of cardiac differentiation
D0 vs. D2	D2 vs. D4	D4 vs. D30
HOXB4	ENSG00000240801	MYL2
MSGN1	CBLN2	CRYAA
HOXA1	LUM	A2M
EVX1	TECRL	SULT1E1
ENSG00000253308	BMP10	CFH
PRSS2	ODAM	NPY6R
EVX1-AS	LINC02715	SERPINA1
ENSG00000257178	PLSCR5	MYH7
RXRG	KAZN-AS1	TM4SF4
DKK1	TNNI1	KRT5
HOXB9	ENSG00000254482	CXCL8
HOXA-AS2	MSGN1	ADCYAP1
EDAR	UNC45B	LRRC10
ENSG00000285543	PMP2	ITIH2
CDX2	GPR149	ITLN1
CDX1	ENSG00000260788	LMLN2
URAD	ENSG00000288776	MGP
LNCAROD	ENSG00000224865	CSRP3
GATA6-AS1	PDE3A	FAP
HOXA5	NR2F2-AS1	CASP4LP
HOXA3	PCSK1	ENSG00000284720
RSPO3	KRT74	DKK2
PRR23D1	SFRP5	EOMES
HAND1	ENSG00000232896	GRIA2
GATA6	ENSG00000254890	ASPN
HOXB7	INSRR	AREG
CDC42P2	TNFRSF9	ENSG00000273301
LINC02715	TNNT2	ENSG00000272668
HOXB1	DKK4	ALB
RPH3AL-AS1	TBXT	BRINP3
LINC00974	GUCY1A1	ITGB6
HOXA-AS3	SPAG11B	AFP
C18orf63	OGN	CARD16
DKK4	TRIM55	VRTN
SP5	CALB2	CFI
PAX2	IGF2	IFI44
ENSG00000286693	NTRK2	NR1H4
ENSG00000289163	ENSG00000256306	TM4SF1
FOXF1	EDAR	LINC01616
ANKRD55	LNCAROD	LINC01867
ENSG00000259477	LNCDAT	PGA3
GIMAP5	FYB2	ALDH1A1
APLNR	H19	FABP2
ENSG00000257729	APOL3	KMO
HOTAIRM1	CD244	MAB21L4
WNT8A	LINC02418	MMP1
TBXT	PGA4	HOXB1
LINC01124	LRP2	HSD17B2
GRAP2	CNTNAP4	KLHL38
FGF17	C16orf78	KLF1
ENSG00000254482	HAND2	ENSG00000289165
TUBBP6	ENSG00000255521	PGA5
ENSG00000283559	NKX2-6	GPR22
IL1RL1	DKK1	CCL21
GATA4	RELN	MIR302CHG
LNCDAT	LINC00974	GPRC5A
LINC02418	ENSG00000241345	HTR2A
HOXB3	GYPB	CASP4
LHFPL3-AS2	ENSG00000259223	HSPB3
ENSG00000225528	RIPPLY1	MYPN
MIXL1	RGS4	LHX9
LGR5	IGFBP3	TLL1
FENDRR	DMBT1	TDO2
MSX1	PGA5	AGT
ENSG00000255028	ENSG00000287928	MLIP
ENSG00000229914	SDR16C5	MARCHF11-AS1
TBX3	DGKI	CXADRP3
UGT2B11	CCDC183	PSKH2
ENSG00000279024	MYL7	LNCPRESS2
HOXA2	APOBEC3B-AS1	FGB
ENSG00000287161	SYT10	ENSG00000270661
TNFRSF9	TUBBP6	NODAL
PRSS1	OLFML1	SMCO1
ALDH1A2	RPS6P12	ENSG00000287075
ENSG00000259280	FGF4	MYBPC3
PMP2	TSHZ2	TMEM176A
ZEB2	FGF19	S100A8
ENSG00000272382	ENSG00000279958	TMEFF2
ENSG00000286198	COL3A1	SLITRK1
SOX17	SLC30A3	ELOAP1
ENSG00000213981	TMEFF2	B3GALT2
ENSG00000259712	AKAIN1	C7
ENSG00000257943	ENSG00000257729	ELF5
ENSG00000232271	NTRK1	DNM3OS
TTC29	LINC01605	ENSG00000285330
KRT74	CDC42P2	ZFHX4-AS1
LINC02038	CDX1	BANCR
ENSG00000286715	ENSG00000255028	AGTR1
EOMES	TGFB2	ADAMTS7P4
LINC00261	CMKLR1	FOXH1
ENSG00000254890	LIPG	ENSG00000288941
C16orf78	SBSPON	RIPK3
DNASE1L3	EVX1	FBXO40
FSHR	IGF2-AS	C14orf180
ENSG00000287415	LINC02074	NPR3
LINC00434	ENSG00000279024	ENSG00000231698
ENSG00000279166	HTRA1	LINC00379
ZBED2	ENSG00000289163	PGA4
ENSG00000279814	NCCRP1	DANT1
SLC5A9	NR2F2	FGF8
HHIPL2	C11orf87	SRPK3
MESP1	BNC1	GPNMB
FMOD	LRP1B	LIM2
ENSG00000271758	ST8SIA6	ADAMTS5
LINC02607	LINC01797	AGR2
ENSG00000242317	CPED1	PRDM14
GAD1	FREM3	TTR
EGFLAM-AS4	CD8B	GJB2
ZAP70	ENSG00000268027	COL15A1
LIX1	DNASE1L3	GBP3
OSR1	SERTM2	KRT6A
ASB5	CALM1P2	GLIPR1
GPR149	ENSG00000231317	FGG
ZNF503	RPH3AL-AS1	CLIC5
ENSG00000253154	PGA3	ZSCAN10
APOL3	CLSTN2	PTGDS
ENSG00000241345	ADAMTS18	ENSG00000287171
CD300E	ENSG00000279805	GYPB
ENSG00000271894	ADAMTSL2	ENSG00000274652
KRT7	FRMPD2B	ENSG00000261434
HAGLR	ANGPT1	ADRB1
LINC01605	ARHGAP20	IGF1
TMEM52B	NXPH2	KCNA4
SPTSSB	SP5	SAMD9
EGFLAM	STAB2	ENSG00000256306
NCAM1-AS1	CRTAM	ENSG00000231781
ENSG00000260788	TTC29	NFIX
EGFLAM-AS2	TNS4	CRYAB
LEF1	ENSG00000279806	SYNPO2
AKAIN1	LINC01467	ENSG00000287382
TRH	FGF17	PDE7B
RPL5P8	CYP2T1P	RD3L
ENSG00000277223	ENSG00000284720	TMEM176B
FOXD3	TBX2-AS1	SHH
KAZN-AS1	BDNF	IFI44L
PPIAP46	DMRT1	ENSG00000287928
STAB2	KCNH5	CDH19
UNC5C	NTS	COL8A2
MYH2	PRR23D1	EDN2
RPL6P2	TMEM88	PRDM16-DT
LHX1	PKHD1L1	BHMT
LINC02084	ENSG00000262267	C6
ZNF703	CD8B2	ACTA1
ENSG00000278909	EPAS1	CASQ2
GIMAP6	THBS2	COX6A2
ENSG00000235934	HCK	IVL
OVCH2	SPOCK3	NPPA
ENSG00000231317	LYPD1	ABRA
KRT16	SYTL5	RRAD
HCRTR2	SVEP1	LINC01108
ENSG00000271477	ANKRD55	APOBEC3H
BMP5	HCRTR2	DCN
SNAI2	ENSG00000213981	C1orf105
WNT5A	VWA2	LIN28A
CCN4	TGFA	NPHS1
SEZ6L	DDX50P2	POSTN
PLXNA2	LINC02607	ERICH5
NRP1	ACTC1	ENSG00000243225
TNFRSF11B	ERAP2	FGF4
ZEB2-AS1	RARB	GASK1B
ENSG00000265477	GYPE	EGFLAM-AS4
ENSG00000287901	SOX6	TRG-AS1
WNT3A	ANKFN1	MMP10
CSMD3	OR5P1P	HHATL
MEIS2	ADGRA2	PDCD1LG2
WNT5A-AS1	SYPL2	SPHKAP
IMPG1	TBX2	NRAP
PLAGL1	COL1A1	ERICH3
ALPK2	GAPLINC	GDF2
GALR1	TAC1	GJA3
ENSG00000197585	ENSG00000249945	ENSG00000231918
FOXD3-AS1	RIPOR2	ITIH3
NKD1	ADAM28	ACTG2
CXCL6	MIXL1	TF
CXCR4	NOTUM	PDK4
SLC6A7	ENSG00000277152	TRIM63
NOTUM	LZTS1	LRRC52-AS1
SRARP	KLHL14	CPNE5
NDUFA4L2	PRDM6	ENSG00000289096
AMHR2	APOBEC2	COL12A1
HES7	ITGA8	ENSG00000286467
CDH11	ENSG00000254951	TMEM71
KCNJ5	C2orf80	VNN2
DIO3OS	CEACAM21	PPP1R14C
ENSG00000286807	FZD10	DRD1
SETP9	HDAC1P1	SAMD9L
CST2	WSCD2	SFRP4
GRIA4	ENSG00000280058	GBP1
GCSAM	PPP1R14C	LINC01467
MSX2	ENSG00000278909	SRD5A2
LINC02772	NKD1	BMP3
SPAG11B	SEMA6D	MB
LINC00479	LMO2	LINC01531
GLIPR1	OR5P3	SLN
CER1	BOC	IL33
ENSG00000276668	NKAIN2	LAMA4
ZNF503-AS2	ENSG00000228031	EYA4
ENSG00000278893	SMOC1	TNFAIP6
TBX6	FMN1	FXYD3
C3orf36	PLPPR4	SOSTDC1
HYMAI	PPP1R17	ENSG00000238178
FGF10	LINC01124	PHYHIPL
VWA3B	SLC28A3	MAP6
KRT16P1	ENSG00000286980	HHIP
LINC02074	ASXL3	ITGBL1
NIPA2P4	CFC1	CKMT2
ENSG00000287101	ENSG00000253308	TFEC
LEF1-AS1	TRAC	THBS2
PRTG	ENSG00000228835	VCAM1
HRH3	CDH9	EMP1
HTR2B	PLCE1	LINC02772
ECEL1P2	CRYBB1	C1QTNF1-AS1
DDX50P2	SNCAIP	CXCL6
CALM1P2	BNC2	FAM110C
WNT5B	ENSG00000270442	DNER
SLCO2A1	ATP6V0D2	MYOM1
GSC	CD48	ENSG00000289215
OR5P2	WNT3A	STING1
ENSG00000285205	D21S2088E	SLC26A9
CD48	CKMT2	LAMB3
PROKR2	COL6A3	WNT8A
NPTX1	LINC01099	TBXT
ENSG00000260573	TBX6	ENSG00000257835
ENSG00000205414	TLR4	MIR133A1HG
IMPA1P1	NID2	LINC02232
INSYN2B	RDH10	KRT17
ADGRF2	KCNMA1	TGFB3
ENSG00000248491	NPNT	FBLN5
OR5P3	GIMAP6	SGMS2
LINC01867	SHD	SLC38A11
DPPA3	ENSG00000280339	IL32
COLEC12	LINC00379	ACSS1
MEIS1	IMPA1P1	LINC00698
FOXA2	HLX	PHACTR3
ENSG00000275612	SOX14	C1R
ENSG00000263571	ENSG00000289581	MYOZ2
ENSG00000254951	LRRC32	PDE1A
ERAP2	ENSG00000273066	CPA4
WLS	GYPA	FSD2
LINC02188	UTS2	INHBA
ENSG00000231918	OVCH2	MTUS1
ENSG00000286467	MYH15	ENSG00000288749
BHLHE22	ENSG00000229914	IL1R1
CASC18	HES7	OR51E1
FAM89A	DLL3	POF1B
VWC2	KCNQ5-DT	KRT13
DSCAM	SHISA2	GPAT3
SGCG	CXXC4	CDX4
ENSG00000287527	RFTN1	VSIR
ENSG00000261268	CD44	COX7A1
ENSG00000279805	CARMN	LRRC14B
OR5P1P	STYXL2	PSMB9
RBBP8NL	LRRN4	ZNF536
KCNJ6	GAL	GASK1B-AS1
PGM5	HTR1E	GPR158
UTF1	LINC01335	SCEL
RASGRP3	ENSG00000223652	ENSG00000254277
CCDC85A	RHOH	ENSG00000289309
MYH15	PCDH7	LINC00458
FGF16	PPIAP46	PALMD
HAS2	SH3RF2	EHF
NPY	LINC00239	ENSG00000272446
CRTAM	PLEKHA7	NECTIN4
SORBS2	EVX1-AS	UGT2A3
LNCPRESS1	F2RL1	ASB2
CA10	SORBS2	CAMK2B
GRP	LINC02381	TCIM
SUSD4	CDX2	LCMT1-AS2
CR2	METTL7A	ABCA8
SEMG1	MYL4	ENG
TMEM26	LAMP5	FOXD3-AS1
LIPG	TBX20	ENSG00000274090
IDO1	GBX2	PDLIM3
ENSG00000261104	SMTNL2	MBOAT4
LINC01605_2	NIPA2P4	PLN
DSEL-AS1	MICAL2	HES3
CTBP2P8	LINC00595	BTN1A1
ENSG00000283529	SERHL2	ENSG00000286639
AADACL3	ENSG00000286807	FGF1
FZD10-AS1	CCDC178	ENSG00000224865
RASGRF2-AS1	ENSG00000261104	VWC2
ENSG00000280135	SHOX2	CAPN6
KRT17P2	RGS5	MYL3
DRC7	ENSG00000284977	MYH6
DIO3	NPPA	SHISAL2B
ADAMTSL2	DLL1	ENSG00000287745
MMP24	GRIK3	THBD
NR0B1	CRACDL	MYO18B
IFI16	ZNF350-AS1	SPON2
ARHGAP24	ENSG00000255583	SPOCK2
ENSG00000286039	GSC	SRL
SLITRK1	ASIC4	AMBP
ENSG00000223930	HES6	ZNF385B
FAM9B	TGFBI	PLEKHA2
ENSG00000288811	ENSG00000288947	ENSG00000286154
KRT16P2	HEY1	LRRC17
ENSG00000244337	CD1D	SP100
ENSG00000238178	ALX4	FGL2
APELA	HOXA1	RIPPLY1
XG	ENSG00000255471	SMPX
MNX1	TG	TINAGL1
ENSG00000278925	ZCCHC12	SLC8A1
RIPOR2	ENSG00000271758	SGCD
ENSG00000286454	GPR158	PRDM9
EFCAB1	COL2A1	KCNK12
BMP4	POMC	SRPX2
TNNT2	WNT4	CR1L
ENSG00000287020	TACR3	DCLK2
ANGPT2	ANGPTL7	CAVIN2
SERTM1	ABHD12B	ENSG00000237265
CRYBG1	EPHB2	PLCL1
SOX2	MEIS1-AS3	TACSTD2
NRN1	SLC40A1	ENSG00000235152
ENSG00000255130	MYRF	ENSG00000288595
ENSG00000286980	ARID3C	C5orf46
TRBC2	TNC	ENSG00000279531
NKAIN2	KEL	SMPD3
EMX1	SSPOP	BIRC7
RP9P	SEMA5B	HAMP
FLRT3	ENSG00000289089	LINC02084
CD226	DDAH1	CLIC3
NKX6-1	RGL1	NGFR
DLL1	C6orf223	IQCF5-AS1
TG	LGR4	LSP1P5
TRIML2	SBK2	SMTNL1
ENSG00000274895	ENSG00000259977	CD93
TCEA3	DCC	ENSG00000215861
CABCOCO1	ZNF467	HSPB7
POMC	LINC01331	SCN2B
DGKK	ST8SIA6-AS1	WFIKKN1
LINC01844	MEIS1	C4B
TUBB4A	URAD	CAV1
PDE3A	GATA5	COPZ2
ZEB1	DNAH2	APLN
CCDC110	LRRC63	GRIA1
ISM1	LINC02593	TNNT3
TJP3	NDNF	NPAS2
SLA	DACT3	FGF9
ENSG00000260029	FXYD2	USH1C
ENSG00000270442	TRABD2A	IGFBP7
ENSG00000235292	SFN	AHR
PDZK1	LCK	GYPE
SHOX2	CABS1	LDB3
NMNAT1P3	CDH20	RGCC
ENSG00000262267	STK32B	MAOB
DLL3	MYOCD	SNX19P3
CDH20	CYB5D1	VENTX
IFIT2	N4BP2L1	TBX18
ENSG00000288967	TPM1	LINC00964
MFSD6	MECOM	ENSG00000289493
CYP2B6	ABLIM3	ADAMTSL1
TNR	MUC4	TXLNB
ENSG00000231295	ZNF385C	NAV2-AS2
KRT16P3	TARID	CORO6
CDH10	DLK1	ENSG00000228999
TNS4	SLC9A3R1	PPP1R3A
LMO3	LINC00698	SAA1
NCCRP1	TNFRSF1B	RHOJ
RXFP1	CALCR	PTHLH
ATOH8	FABP5	PRTG
TTYH1	MBNL2	ADGRF5
VEPH1	GALNT14	SERPINB2
HLA-DPB2	MPPED2	LNCDAT
SKAP2	RSPO3	ENSG00000286855
EPN3	PYGM	KLHL41
APCDD1	GPR155	SALL1
LINC02192	CD300E	DNAH2
PSKH2	CCDC85A	CRYBB3
CLDN11	SAMD11	FABP3
COBL	ETV4	LINC00881
ADARB2	MNX1-AS1	PTPRH
CXADRP3	MYO3B	ENSG00000287101
YAF2	CERKL	TFPI2
ENSG00000274330	ICAM1	CX3CL1
ENSG00000287579	ENSG00000258433	ENSG00000272789
PCSK1	TLL2	POTEC
KLHDC7A	APCDD1	SGPP2
MIR124-1HG	MKX	RPS3AP34
PROX1-AS1	AQP1	NFIA
MRC1	TTC39B	PDGFC
ENSG00000253164	ENSG00000271894	TMEM117
TNFRSF19	ACVR1C	ENSG00000229797
LINC02803	TAFA4	KRT7
PROX1	SYT9	OSMR
LHX1-DT	FRMPD2	SQOR
PCAT14	COBLL1	ENSG00000260834
COX4I2	ENSG00000239268	MIR137HG
BDKRB2	CA12	AKAP6
PDGFRA	SYBU	CALHM5
CD1D	DNAH11	EBF1
ST8SIA6	CPE	LINC02653
FEZF1-AS1	LINC02024	COL10A1
LINC02603	ENSG00000277017	LAMA3
SNAI3	PRRX1	BLID
ANPEP	KRT16P1	ALPK1
FAM167A	ENSG00000240393	ENSG00000277223
DLC1	LMOD2	WNT2
FILIP1	APOB	C1S
SHISA2	GBX1	SLFN11
ENSG00000279692	PTH1R	IRX4-AS1
VGLL2	TUBB2B	CNTN3
SHISA6	ENSG00000259477	FRMD3
FAM222A	ENSG00000285205	CKM
DMRT1	NCKAP1L	CILP
TMEM125	ENSG00000223486	PSMB8
NTS	CACNA1C	BDNF
ALKAL2	BMP5	GIMAP4
FUT9	LINC02141	SORCS3
LMLN2	MOXD1	MYZAP
UTS2	VWA3B	GAL
TMEM119	TMEM215	ENSG00000248491
MCOLN2	PKLR	ITGA4
ISL1	ZNF703	CDKN2C
AK5	TFPI	ENSG00000243944
ZNF683	ENSG00000280046	CCL2
SIM1	MYL3	RAB27B
ENSG00000289533	JPH2	WFDC1
POTEC	ADCY10	SLC41A2
RBP1	DOC2B	LPL
ENSG00000259362	BRINP1	PDE4B
LPL	ITGA4	UNC5B-AS1
RASGRP2	LY6G6D	ENSG00000278041
ENSG00000249945	ADAMTS12	C1QTNF5
PCMTD1P3	ENSG00000233393	MGAT4C
BMP2	USP41	PTGS2
ENSG00000289095	SHISAL2B	C1QL4
MFSD6L	ENSG00000258417	ZAP70
LMOD1	TRPM3	SYNPO
ZNF350-AS1	ENSG00000286454	PPIAP46
HMX2	RAB37	TSGA10IP
LMO2	SKAP2	ENSG00000287492
ENSG00000266925	SP8	HPAT5
SNX19P3	MYOF	DSC1
ENSG00000260592	TCF21	ENSG00000289013
HTR3A	DMTN	MIR100HG
IL5RA	SLCO5A1	NR6A1
MYO3B	ENSG00000267927	RNASE1
ADAMTS8	RUNX1T1	ABLIM3
CCDC92	WNT9B	DCX
SLC8A3	LIMD1-AS1	ANKRD34C
LINC02141	GRIN2B	NTRK1
ENSG00000279958	FILIP1	DCDC2
ILDR1	SEZ6	ENSG00000289040
PPP2R2B	PKDCC	COL14A1
ITGA9	DRD2	GLRA4
C7	ENSG00000260577	MUC16
SEMA5B	ENSG00000274995	INHBB
ENSG00000285835	EPHB6	SLC7A3
CCN2	TSPAN32	EGFR
MYF5	HCN1	NNMT
COL13A1	DSCAML1	LIX1
ENSG00000289436	ENSG00000288079	ENSG00000286198
SLC27A2	LMLN2	XIRP2
GLS2	FOXF2	PLXNA4
NTN1	ENSG00000254339	TNFSF10
ARHGAP20	MMP24	FAM13C
DACT1	TCP11L2	KCNIP4-IT1
MNX1-AS1	CLIP4	LIMS2
LY6G6D	WNT5B	DES
TRPM2	ST3GAL5	ENSG00000256995
ENSG00000286889	C1orf94	ERAP2
SLC16A11	SLC39A8	PODN
COL5A1	OSR1	TCAP
TATDN2P3	LFNG	LINC01629
CA2	C18orf63	MAN1C1
GABRB2	BMPER	CD70
ENSG00000286071	AXIN2	HHIPL2
SHANK2	STMN2	NPNT
PADI2	SLC1A3	PLP2
ENSG00000259223	NRG2	EPN3
KLHDC8A	SYT1	ENSG00000286693
HYAL4	MYLK3	FBXL22
C11orf87	FIBCD1	ENSG00000282048
ENSG00000272908	DDX58	ENSG00000286339
FZD5	ISL1-DT	CYP26A1
GRIN3A	TRANK1	SLC5A1
C9orf135	TUBA4A	PRDM16
LRMDA	RTP1	ENSG00000264007
STRA6	DOK4	KLF2
ENSG00000255516	IER3	P2RX1
GREB1L	GUCY1B1	TRIM71
KRT72	CYP2B7P	MIXL1
LINC02570	IL1RL1	NKX2-5
COL10A1	C1orf21	CST6
DPYS	GCNT4	PARM1
BICDL2	ADAM12	CAVIN1
KCNH5	CD86	NR3C2
MEOX2	PARM1	IL18R1
ADAM12	OSMR	SCN2A
UNC5C-AS1	KIFAP3	PLA2R1
LINC01695	TRPC4	GCNT1P3
ENSG00000262714	ADAMTS8	SSPN
TBR1	CDCP1	ANXA8L1
UNC13C	CRMP1	NETO1
TINAGL1	ANKRD63	CNTN6
ENSG00000229770	LRRTM1	GALNTL6
FNDC5	TMEM154	GFRA1
ENSG00000269883	ODC1	TCEA3
LINC01674	SLC7A2	NHLRC1
ENSG00000279806	GBP4	GUCY1A2
ELL2P1	CDK6-AS1	SULF1
CALB2	ENSG00000287446	TNNC1
PARD6A	ENSG00000286747	ENSG00000226900
FAM131B	FGFR2	KCTD16
PDZRN4	CTTNBP2	ENSG00000289561
PRDM14	ABCG2	PTX3
BRINP1	ENSG00000286109	DGKK
KCNA5	FAM167A	ITGA2
ENSG00000237321	COL23A1	LMO7
LINC01484	MOK	CSGALNACT1
FST	MTUS2	TRIM47
ENSG00000267927	ARPC3P2	ARSJ
ST8SIA6-AS1	LEFTY1	COLEC10
HCG24	CACNA1I	AQP1
TMEM108-AS1	RBM24	THRB
PVALB	ENSG00000271811	ENSG00000253882
SP6	VEGFC	TERT
ATP8B1	ENSG00000231615	LINC01356
FAM107A	ENSG00000289458	DSC3
ODC1	FZD4	ENSG00000255345
CNTN1	DYNC1I1	SYNDIG1L
PKD1L2	QPCT	LGR5
CHL1	GATA3	CMKLR1
TRERF1	LCP1	ENSG00000248605
IGSF21	KCNQ5	ASB11
GMPR	SH3BP5	HR
ARL4D	MXRA8	ENSG00000268027
SH3GL2	ENSG00000288932	EPS8
RGS7BP	ENSG00000256552	HSF4
EPHA4	ARHGEF17	CRIP2
ENPP3	KCNH1	ENSG00000253507
PAK6	SMAD6	FOXO6
LRRC55	ELOVL2	GPR85
GPR78	BDKRB2	GTF2IP8
ENSG00000288761	IL23A	AIDAP2
GAPLINC	TBX5	APOBEC2
VIM	HSPD1P11	CCDC68
FAM111A-DT	PRRT4	GLRB
ENSG00000231698	MAPRE3	OSR1
MUCL3	USP18	SORBS2
RASSF9	TMEM190	TAFA4
ACTN3	KLF1	SPNS2
CCR7	IMPG1	DSG1
MARVELD3	ENSG00000286039	ART5
GRIN1	FZD8	ENSG00000289533
CRACDL	ENSG00000262198	UPK1B
ANGPT1	ENSG00000286198	ENPP7P1
SLC30A4	TMEM74B	TUNAR
COL6A6	CCBE1	MROH7-TTC4
TMEM30B	AXL	FITM1
CCNA1	CYP26C1	ATP6V0D2
ROR2	NR4A3	MYH11
RASAL1	ABCA1	SLC35D3
PCDH1	TMEM141	ENSG00000289158
LZTS1	EPHA7	RAMP1
LINC02476	COL6A6	GABRG3
ENSG00000233420	POM121L9P	ENSG00000259753
IRX3	ABHD6	MBNL1-AS1
INHBB	EMP2	IGFL2
ENSG00000289337	RBP1	ITGA11
ENSG00000272555	ENSG00000285939	ENSG00000227544
NPY2R	TTYH2	AHNAK2
SNTG1	TCF7	LIN28B
POU3F1	ERBB4	KLHL31
SOWAHB	ENSG00000258461	PCDH9
MAGI2-AS3	ENPP1	ENSG00000286558
ENSG00000176320	COL21A1	LGALS1
ITGA2	NHSL2	KRT23
KCNIP1	GOLGA7B	ST6GALNAC1
BTBD11	NUS1P2	LINC01351
TOX	IPCEF1	TNFRSF11A
CXCL5	FZD5	LSMEM2
SNAI1	CDH23	HSPB8
SYT9	ENSG00000287897	ENSG00000274642
CERKL	LRATD1	SALL4
PROK2	SHE	ENSG00000280323
RALYL	VAMP8	SYNM
ENSG00000289289	POU5F1	LIMD1-AS1
TFCP2L1	NEBL	TRH
MEIOB	CADM1	ENSG00000253348
ENSG00000260317	FAT4	SH3BGR
PLCXD3	SLC9C1	NFIB
RASSF2	ATP1B2	ASB10
AKR1D1	WDR86	WDR87BP
CHST4	NOS2	CCDC89
CABP1-DT	IL5RA	HSPB6
COL9A1	KCNA1	CYB5D1
TMPRSS11E	DES	PROKR1
LRRTM1	ERVMER34-1	CD44
ST14	GALNT13	LINC02192
ENSG00000286788	RBM20	LNCPRESS1
PSMB9	TNFSF4	BICC1
GRAMD2B	CCDC3	ENSG00000282381
IL1RAPL1	CD99	KCNQ1
IGFBP3	MAP1A	EPHA3
SLITRK3	LONRF3	SLC6A17
PDGFB	ELL2P1	PARP9
SBK2	CCN2	INHA
OVOL2	ITGB2	TBR1
ARPC3P2	CTSV	ATP2B2
ENSG00000260249	SNAI1	WDR49
CDH2	ENSG00000279675	COL16A1
SNTG2-AS1	DNAJC6	ADGRA1
ENSG00000288015	SYNE3	GP1BB
SDR16C5	CDA	ENSG00000258750
ENSG00000272944	LINC01170	FXYD1
ENSG00000260776	HOTAIRM1	CHSY3
TRG-AS1	ENPP7P11	GEM
IFIH1	CRB2	HAPLN1
PKNOX2	SKIDA1	ENSG00000287838
PNPLA5	PLXNC1	GDF6
ENSG00000255216	MOCOS	ANKRD19P
ENSG00000251408	KIAA0040	KRT14
ITGB2	NRP2	CDKN2B
P3H2	ENSG00000236494	FLJ16779
WWP1-AS1	MXRA5	TMEM40
ENSG00000289078	FOXP1	NCR3LG1
ZDHHC22	ST8SIA1	TGM2
TIFA	B3GNT7	ENSG00000289101
GLRA4	CPT1A	PCDH20
PCDH8	PDE6G	SERPINE1
LINC00239	ENSG00000176320	CD300E
FLNC	TAGLN3	RSPO4
KLHL14	AHNAK	CPT1A
PODXL	MME	ENSG00000255367
ENSG00000269155	GABRB2	ENPP7P8
ZNF385C	GCH1	TNS1
ZMAT4	FAM181B	TRDN
SAMD5	NPY1R	A4GALT
MAGEA4	ANGPT2	NT5E
GPR83	NAV1	C4A
BNC2	ALPK2	HSBP1L1
AXIN2	ISL1	PRSS35
GALNT3	VWA5B1	ENSG00000226063
LINC00467	SLC6A2	DTNA
NMNAT2	TIPARP	ENSG00000287891
PARM1	RAB39A	NRK
FAM131B-AS1	DPEP1	FBXO32
LUZP2	ETNPPL	ENSG00000232906
MBP	PMP22	SRPX
SCNN1A	MAOB	RNASE4
ZNF804A	COL6A4P2	SAMD3
SERPINE2	IP6K3	BHLHE40
LINC00877	GRM4	TPPP
C2orf78	CDK14	CPXM2
ENSG00000279675	RHOV	EEF1A2
TMEM178B	DGAT2	DRC1
LINC01018	PODXL	ANXA1
TENM4	LINC00942	ENSG00000283692
ENSG00000284837	CHRM4	RPS3AP30
DELEC1	H1-6	TM4SF18
LINC01558	KCNJ12	C1orf116
DOC2B	LINC01151	CDKN1A
SLC16A14	ITPR3	REEP1
B3GALT5	AMER3	GRAP2
AQP4	ALDH1L2	ENSG00000235934
ENPP2	YPEL2	JAKMIP1
FAIM2	SLC6A15	CXCL14
COL24A1	RHOBTB3	LTBP2
KCND2	TYRO3	CD274
TRMT9B	ENSG00000250501	NRG2
LINC02128	EFNB3	CCDC9B
TMEM132B	WNT11	APBA1
ISLR	LTBP2	CMAHP
PPP1R14C	PRKD1	ENSG00000289195
SCML4	LAYN	ENSG00000279104
GFRA1	EPHA1-AS1	ENSG00000288992
LINC02600	RAP2B	KCNH1
ZNF860	PIEZO1	STEAP1B
LINC00456	RGS7	LMCD1
ENSG00000227712	GPRC5C	SLITRK2
UBR5-DT	BACE2	HDAC9
P2RX5	LINC00467	RAB6B
SMYD2	NOD1	KCNQ3
RASGRF2	ROR1	ENSG00000283674
CALCR	SYDE2	SLC6A4
ENSG00000269997	MRAP2	SCHIP1
ENSG00000289358	MN1	ENSG00000256321
LINC01722	CCN1	ENSG00000256029
ZNF804B	AKAP17BP	D21S2088E
HHAT	CTSK	SLC8A1-AS1
MYMX	EOGT	ENSG00000289205
SCG5	CHST2	LINC01896
SVIP	EPHB3	LINC02325
ENSG00000228999	POU3F2	FOXP2
NUS1P2	CD200	HSPA8P4
CMKLR1	CHMP4C	ENSG00000265174
CA3-AS1	ENSG00000276772	ENSG00000287972
LBX2-AS1	NRROS	SCN1A
LYPD3	PFKP-DT	MUC15
PIWIL2	AP1M2	ENSG00000260196
ENSG00000264727	ST7	ENSG00000271420
ITGA6-AS1	SEMA3E	KCND3
SLC7A14	COMTD1	NXPH4
FAM124B	PAQR9	ABLIM2
UNC5A	LCMT1-AS2	BIRC3
GRB7	ANAPC1P1	GRM4
TCF7	PYGL	SMOC2
APOBEC3G	NELL2	ENSG00000219445
PRR36	SCUBE3	SGIP1
ENSG00000288749	LINC00205	ESRG
HAS2-AS1	RSPO4	APOL1
PHC2	PAOX	ATP13A5-AS1
PCDH10-DT	ADGRB2	TLR1
CCN1	WDR86-AS1	LMOD2
TMEM154	LINC01415	LINC02617
ANK1	KIF26B	SELENOV
SLC38A4	FGFR3	EDN1
PACSIN1	RIN2	LINC00678
PGAM2	CNTFR	SIK1B
DNAH9	ITGA1	MGC32805
SMPDL3B	NCR3LG1	ADAMTSL5
ABLIM2	PDE4C	LINC00937
RNF144B	EPS8	MVP
LINC01410	TMEM185A	FRY
ENC1	ARMH4	ITGB3
TMEM132E	ABLIM1	GCOM1
TNFSF11	TUBB4A	BCL3
ENSG00000288587	TCHP	ENSG00000234869
ROR1	F10	CRIP1
BHLHE40	SSC5D	ENSG00000286600
CNKSR3	VSNL1	KCNK5
HSD11B2	PSD4	LINC02618
NWD2	ZNF608	ENSG00000272797
CGN	TPM1-AS	BVES
KIAA0895	ENSG00000230699	FRZB
CAMKV	KCNB2	IL1RAP
BMP6	CDON	ACTA2
STK31	SH3RF3	PLPPR5
LINC00942	IL17RD	PIK3R5
PPP1R16B	DCBLD1	CORIN
TERF1	ZNF578	CCN4
CNMD	RIMS4	PAG1
RASGRP1	FZD2	TAP1
HS6ST3	SOCS3	FZD1
CITED1	FAM78A	RAB33A
TACSTD2	SDK2	LINC-ROR
SOAT1	DPY19L2	ENSG00000254339
NANOGP8	CABLES1	ITGA1
PRR16	ARRB1	ENSG00000271208
ENSG00000250979	SOCS3-DT	GPR55
THY1	HMGB3	EFEMP1
VSNL1	GSTO1	GRPR
HECW2	ARL4D	LMOD3
ELFN1	PDE5A	LRRC39
CPZ	CBLN1	FGF18
EGFL6	TIFA	APC2
GNA14	ANKRD35	HMGA1
NANOG	ARRDC3	LAMA2
ZFYVE28	CACNA1G	SEPTIN5
TMEM74B	EGFLAM	CCSER1
ENSG00000255730	CEBPA	PDGFD
ENSG00000274578	NQO1	GABRA2
ICA1	SELENOP	ANXA8
MYF6	AJUBA	SERHL2
TENT5B	FER1L4	ENSG00000284625
ENSG00000262198	GLTP	ENSG00000268518
LINC00678	CLDN23	CTSV
TMEM51-AS1	PRRT2	KLF4
TBC1D9	SMAD9	TMEM163
GABRA5	RNF152	RBM38-AS1
VWA2	ZNF83	ABCD2
KCP	PRKCQ	IGFBP7-AS1
MCOLN3	LHFPL6	VWF
SAMHD1	H3-2	SYPL2
ENSG00000232599	ODC1-DT	SYT13
PPP1R3C	SLC6A20	MIR3142HG
PYGO1	SLC35F2	SAMD5
FGFBP3	GLCCI1	COL3A1
ENSG00000279882	ENSG00000287312	TNFSF15
PRR15	ARHGAP28	STBD1
SNCAIP	MPP1	SALL3
ENSG00000288993	GNAL	LINC02700
ANKRD44	P2RY1	POPDC2
RORB	CLGN	PTGER3
SORCS1	SLCO4C1	ENSG00000288597
SYT2	CARD10	NR3C1
MGST2	SORBS1	PRR15
ENSG00000258422	ZHX2	ENSG00000267424
PIM2	FLT1	CAV2
CA3	EPHX1	CSDC2
CRYM	LINC00894	ITPRID1
RHBDL3	CREB3L1	GALNT5
TENM1	PGF	HAS2
LINC00173	RNF24	L1TD1
TGFB1	LRRC4C	ENSG00000286071
FAM124A	SPSB4	KCNG1
SFRP2	CELSR2	POPDC3
PDGFA	IDH1	NOS2
C1orf210	BACH2	DNAH11
SULF1	MAGI3	CABS1
ANO1	TNFRSF21	KRT80
SETD7	SLC22A15	CT75
PRRG4	PELI2	FOXF2
RNF24	SDC4	C4orf50
IRX5	SLC5A3	TBX5-AS1
DISC1FP1	ISYNA1	COL8A1
PHC1	ZNF702P	SNAP91
GABRA3	MATN2	ENSG00000259275
PIP5K1B	BLCAP	CADPS
ACTG2	TUBB6	ARID3B
NOL3	EVA1A	ADPRHL1
MTMR7	ENSG00000251468	CHRM2
DUSP10	CBLB	SYNPO2L
ENSG00000259203	NCOA1	DDX60L
NGFR	LNPEP	ENSG00000254610
SLCO4A1	CUEDC1	MT-RNR2
WSCD2	FAM53B	GOLGA8M
FAM181B	SKA1	CASQ1
ADRA2B	CDH2	GHR
ARTN	SMC6	DNMT3B
PRODH	ENSG00000259754	MESP2
BSPRY	ENSG00000258919	TMEM139
MTAPP2	ANKRD1	ENSG00000289287
LINC01480	CXorf49	SP8
KCNK2	HAPLN1	FGF7
PREX1	LINC02320	RAB37
RAB19	ENSG00000285847	HLA-DOA
TGFA	GASK1B	ACTN2
SLC1A4	MRC1	GPRIN3
RAP1GAP2	MESP2	FSHR
TTC39B	NPPB	TNNI3
GRIK3	APOA1	NANOG
LINC01204	GREM1	PLPPR4
TMEFF2	OTX1	SEMA3D
HCK	IGFBP5	MTARC2
PDK1	JCAD	ENSG00000213144
TAFA4	CGNL1	LINC01508
ANGPTL2	APCDD1L-DT	DNAAF3-AS1
ITPR1	ENSG00000227712	LINC02532
VASH2	ENSG00000237265	SCG2
NME5	PLPPR5	GBX1
KCNV1	HAND1	WNT9A
ENSG00000279138	EBF2	GAS6
DPYSL3	EFEMP1	MITF
SLC39A8	DMRTA2	CD36
ENSG00000253636	FAM20A	ENSG00000287743
TMEM255B	LINC01780	CD177
CACNG7	FOXD3	MIR4435-2HG
HS3ST3B1	FZD10-AS1	ENSG00000282917
PSMB8-AS1	GGT2	ENSG00000287906
RGMB-AS1	INHA	THSD4
MAP3K4-AS1	GATA3-AS1	CREB5
DNER	SAMD3	PACRG
SIPA1L2	ANXA2R	S100A6
HSPA2	SH2D4B	KLF9
CKMT2	MIR1915HG	DTX3L
SYT12	CSMD1	PCDHAC2
SLC45A1	FHOD3	APLNR
TAC1	APELA	TP53TG5
MANSC1	LGALS12	PIP5K1B
ENSG00000284606	MDFIC	MYADML2
PHC1P1	PLEKHA6	MPZL2
LIX1L	KAZALD1	RPL32P9
NLGN3	ENSG00000227141	ENSG00000285933
TNFRSF8	ABTB2	MBNL1
FABP3	ADM	ANGPT2
ELFN2_2	ALCAM	SLC45A2
LAMA4	NTN1	MAGEB17
KIAA0319	GABRA2	PLCXD3
ENSG00000285541	ENSG00000284294	RASGRF2
MAMDC2	NDRG1	ADGRF2
ENSG00000266378	TREML2	NDUFA4L2
SHLD2P3	ENSG00000279882	MASP1
ENSG00000286215	CD300A	LGALS3BP
EPAS1	MDGA2	ENSG00000284606
HOOK1	SMOC2	INPP4B
SYT13	CYP27A1	FHL2
ENSG00000258649	C1orf116	JCADP1
PDZD4	TESC	SEPTIN4
ENSG00000233290	FAM43A	ENSG00000251687
TTLL6	KCNK12	ABCA10
ENSG00000234261	ZBTB16	SLCO5A1
NANOGP1	SLC35F3	HAND1
ENSG00000224307	TFPI2	ENSG00000212664
SCN9A	NRCAM	TRIM69
PCBP4	IKZF1	ARID3C
FMN1	DSC3	ENSG00000197585
ENSG00000286707	CYTL1	L3MBTL4
TNC	ACKR3	HBEGF
RMST	NMNAT2	RIMKLA
ENSG00000285933	KCNH2	USP44
C5orf58	MIR205HG	CES4A
POLR3G	ENSG00000285541	TGFB1I1
EPSTI1	ENSG00000285958	ENSG00000272482
TCHP	RHBDL3	GLIS3-AS1
ENSG00000177738	ID4	SH3TC1
FAM110B	ENSG00000248927	SFXN3
FHDC1	NRXN3	CRYL1
NUP210	ENSG00000234350	SORCS1
MCIDAS	ASIC1	ENSG00000289134
RABGAP1L	BMP4	MGARP
GRHL2	LMNTD2-AS1	MROH7
MMP2	MEGF10	CYP2J2
CA7	IL1RAPL1	CCNA1
ZFHX2	HS3ST3A1	ESRRB
BEND4	COL9A2	ENSG00000282024
CGREF1	GCNT2	PDGFB
C20orf202	NPY	ENSG00000259556
ATP8A1	NETO1	GYPA
CRISPLD2	ENSG00000231918	PLIN5
GABRQ	FLRT3	SERTAD4
RIPOR3	VAV3	DSCAM
ANKRD24	WAKMAR2	CMKLR2
ENSG00000277463	BAMBI	TIMP2
SOX3	SEC14L2	LINC02885
ENSG00000231863	LHX1-DT	NFATC2
LINC00605	ISLR	ITGB1BP2
NRK	MXI1	SPTB
ENSG00000230333	MSX2	DAAM2
ABLIM1	MTMR8	DCT
NFE2L3	OGDHL	DOK7
HVCN1	SMAD7	CCKBR
ENSG00000283982	PCDH17	FRMD5
ENSG00000260337	CXADRP3	B2M
SHISAL2B	FGFBP3	DAW1
TCF7L1	CDH10	PRSS23
ENSG00000283669	NEO1	MYH7B
KCNJ11	SHISA6	LRRK1
ITGA5	HMGB1P21	ALPL
PCDH10	CDH13	F2
OLFML2B	LHX1	GAD1
EDN1	MIR210HG	DHRS3
GABRG1	GALNT10	ENSG00000260604
DDIT3	KCNH8	ENSG00000283638
ATP1B2	LRP10	OSBP2
ELAVL2	ID2	MIR181A1HG
LHX2	CASP8	PDE4DIP
PRKCG	LPGAT1	FAM189A2
AMIGO2	S1PR3	ENSG00000287860
ENSG00000279030	ENSG00000223930	ENSG00000289579
SLC37A1	ZEB1	LINC02256
ARHGAP40	ZNF611	TESC
ABCA3	JAG1	LINC01137
CADM4	LRRC8C	THBS1
EPHA1	GLT8D2	LINC02582
PROM1	C3orf52	ENSG00000289479
ROCR	ZNF813	BCL6
SLAIN1		LEF1
LEKR1		TNNI3K
FABP6		PEAR1
SOX5		CASZ1
LINC02284		TRADD
SLC2A12		FAM89A
TNFRSF1B		MAML2
ENSG00000279601		TP53INP2
SLIT3		RAB9B
NAP1L3		SLC16A7
CHI3L1		SPP1
FRMD5		MAEL
EPB41L4B		ST8SIA1
ENSG00000286747		TMEM72
GPR176		IFI6
ZNF436		MSRB3
POSTN		FAM133CP
ENSG00000229668		PSORS1C1
BACE1		ENSG00000257322
ENSG00000285188		SLC25A4
NUPR1		NIBAN1
TRHDE		DKK3
TPM1		SLC9A2
AFAP1L2		C19orf33
SSTR2		SLC2A9
C1orf21		EGLN3
UTS2B		HTRA3
NAP1L2		TIMP3
HPCAL4		FGF23
ZNF488		CPQ
USP44		ENSG00000258649
GBE1		MAGI2-AS3
C19orf33		CYTOR
PRKAR2B		IL1RL1
PARP3		ENSG00000288754
ENSG00000289168		INSRR
KCNG3		G0S2
YPEL1		LAMA1
METTL7A		GSTM3
ENSG00000276170		TDGF1P3
ABTB1		KLHL30
CABP1		SELENOM
ENSG00000288897		LINC01213
MRC2		DPYD
SLC7A3		GXYLT2
DPPA4		DHRS9
TJP2		ENSG00000289109
L1TD1		MAP3K7CL
ENSG00000276651		ENSG00000260586
ENSG00000260816		NFE2
COL5A2		ENSG00000224090
ENSG00000279725		VTCN1
ENSG00000289287		CMYA5
COL8A2		HRC
ENSG00000287025		CALCB
C1orf115		PERM1
CD44		ENSG00000288876
ABHD6		CCDC169
PDPN		UGT3A2
DAB1		NFIC
ENSG00000260126		EPPK1
PLEKHA7		MS4A6A
NHSL2		ITGA3
LINC00963		PRRT1B
KCNK12		AMER3
SYT16		RCAN2
SHROOM3		TPD52L1
DDIT4L		ENSG00000254340
LNX1		TMEM88
JARID2		ENSG00000272341
RUBCNL		LCN12
AP1S3		BMP6
LINC00458		LINC02082
PPP1R16A		LGALS12
EPPK1		PLA2G3
ENSG00000289527		SH2D4B
ANKRD29		ENSG00000256552
COL1A2		ENSG00000289297
S100A14		PECAM1
ENSG00000231170		DNAJA4
PCDH19		SMPDL3A
ID2-AS1		THBS1-IT1
ENSG00000279796		DUSP26
PGBD5		ENSG00000213252
ZSWIM5		ENSG00000286504
HDAC9		PRSS42P
ERMN		RN7SL3
FAM111A		USHBP1
JPH4		ENSG00000224273
DDX25		DNM1P51
GUCY1B1		GALNT18
WSCD1		FGF17
TDRP		ENSG00000271894
RHOH		C10orf88B
RND2		TMEM132B
ST8SIA4		PLD1
PRIMA1		PI16
ENSG00000267568		PGAM2
CHRDL1		SERTAD4-AS1
TMEM266		CDC42EP5
ENSG00000272293		LINC01630
SPP1		JAG2
ENSG00000249790		LDLRAD4
MTUS1		GOLGA8Q
ENSG00000289199		SCN5A
POU5F1P3		ENSG00000279885
ENSG00000250046		LACC1
SYTL2		SOCS2
B3GALT1		UBE2QL1
ENSG00000288762		IRF8
SEMA6A		LINGO1-AS1
MTARC2		JUNB
CAVIN1		CNTNAP2
MMP9		ENSG00000289580
KIFC3		ENSG00000289642
CNTNAP2		TDGF1
SEPHS1		DYNC1I1
VIPR2		LOXHD1
GALNT14		ACSL1
SLC9C1		ANKRD18CP
ENSG00000274248		CD248
GRHL1		ENSG00000270504
SLC29A1		CDCA7
SALL2		ENSG00000277463
CLU		EPS8L2
GPRIN3		PLP1
DNMT3B		GRID1
ENPP7P8		ENSG00000289026
ENSG00000272163		ENSG00000276850
TP73		ARID5B
PTGFR		ENSG00000267919
ENSG00000233834		SIRPA
UGP2		DIRC3
ENSG00000289370		ENSG00000289527
RTL5		ENSG00000271349
NAAA		ESRRG
NBPF8		COCH
LINC01356		ART4
N4BP3		KCNJ2
GALNT18		NR2F2
SEMA3A		ENSG00000248588
CSRP1		MYL6P2
GLB1L3		CCDC85A
AASS		TJP2
C4orf50		RASSF10
FOXO6		GPD1L
FLJ16779		ZNF90
NRARP		FILIP1
EMSLR		PRO1804
CELSR2		HSPA4L
CDK15		ENSG00000288895
RDM1		SLC4A3
PDE4D		ENSG00000278869
FKBP9		AFAP1L1
ANK3		CER1
HAPLN3		PPARGC1A
KLF5		FAM78A
FLT1		LPA
ZNF781		IGFBP3
COL26A1		KCNH7
ANKRD30B		KANK4
JADE1		TRPC3
ANKRD20A7P		DDC
CLDN3		FHL1
GRIN2D		CCN2
EFHC2		ENSG00000236673
CUEDC1		CBSL
FOXO1		STAT4
ENSG00000254339		ARHGEF3
CLDN4		TAGLN
DISC1		CRLF1
GPR160		FIRRE
ENSG00000289399		SNTG2-AS1
ENSG00000286257		SVIP
FOXI3		SNTA1
ENSG00000251468		SLC9C2
CD68		ENSG00000284727
PIK3CD		EPAS1
TRHDE-AS1		TRIM9
DYSF		ENSG00000286807
LINC02904		TNNT2
MMP17		CADPS2
WDFY3		FBN1
MAP7		ENSG00000287842
ATE1-AS1		WDR86
GLIPR1L1		SPOCK1
ENSG00000229677		BMPER
RAB26		ENSG00000288658
ENSG00000280190		YPEL4
CDH23		RPL10P7
PODXL2		ENSG00000254539
KAZN		S100A16
NEDD9		HRH2
ZNF483		COL11A2
ZNF165		CHMP1B2P
THSD7A		CACNB2
PATE2		PTPN13
PAK3		AUNIP
FLI1		SHISAL2A
ST8SIA1		LHFPL6
CYRIA		MTSS1
ACSS3		EGFEM1P
MEDAG		STUM
HES6		XK
TMEM200A		ENSG00000250240
S1PR3		MEIS1-AS3
PSMB8		TXNIP
TDRD5		FER1L6
CRIP3		ENSG00000284874
SLC16A10		GPR19
ENSG00000250240		TGFBR2
RPL5P18		SFN
ENSG00000237356		SUSD4
KLK7		CDKN2D
LRRC1		FSTL3
SLC26A10		ARHGDIB
ENPP5		ENSG00000230623
SPART-AS1		PPP2R2B
ENSG00000230623		ECM1
FA2H		TMEM140
SRL		ACOX2
HLA-F-AS1		CFC1
MBNL3		GREB1
CBX7		BTN3A1
ENSG00000258072		FHOD3
PHYHIP		PNCK
MGAT4A		ENSG00000288589
FAM24B		ENSG00000272840
FLRT2		ENSG00000272240
ENSG00000289158		SIX2
SLITRK6		TATDN2P2
ENSG00000256651		ENSG00000234350
RHOBTB3		EMB
LRIG1		UAP1L1
TEX11		RYR2
HCN1		IRX4
HTRA1		MCF2L2
CRACR2B		SERTM1
CTTNBP2		ENSG00000289372
ENSG00000271327		SLCO3A1
ENSG00000248927		WDR86-AS1
PIM1		ARRDC4
CALB1		PLA2G4F
NALF2		IL12RB2
IL13RA1		ENSG00000283403
KLK8		LURAP1L
ENSG00000287032		DMD
CAMK2D		LINC02144
DCBLD1		CADM4
CADPS2		RETREG1
KCNMA1		ANGPT1
ENSG00000288011		SLC4A4
TMEM255A		TBX5
PCDH9		SOHLH2
DPPA2		RPS6KA2
BCAN		NFKBIZ
KHK		GS1-24F4.2
FOXO4		STXBP6
TTC39C		ENOX1
NBPF20		PWWP3B
CLDN10		HPCAL4
XYLT1		ENSG00000250280
ARHGAP18		SMOC1
ENSG00000285517		MESP1
ERICH2		PTPRB
ENSG00000216809		STAT3
PYGM		CD109
ZNF219		ORC1
RAB33A		CECR2
FLVCR1-DT		ENSG00000286985
ENSG00000286976		PREX1
MIR302CHG		PDE4DIPP2
DNAJC15		HOXA1
ENSG00000205562		MIR1-1HG
SLC1A3		CTCFL
DNAJC22		ENSG00000229065
ERBB2		SLC17A5
MOK		ENSG00000284648
ENSG00000279689		ACOT11
GALNT16		CHRNA5
SMC1B		MTUS2
SMIM10L2A		SP5
C6orf223		SCUBE3
AXL		TRPA1
C1R		ENSG00000240801
TMEM106C		APCDD1L-DT
PCDHAC2		CXCL5
ENSG00000283674		THSD7A
DENND3		CSPG4
ENSG00000287416		SGK1
BTN3A1		PCGF5
ARHGEF28		ENSG00000273760
ADM		IGDCC3
RRAGD		KEL
SOX15		ENSG00000256654
DIRC3		ADGRG6
PTCHD4		HSPB2
CLDN23		LRRC4
LINC00408		WNK2
CYP7B1		ENSG00000287560
ENSG00000282012		C1QTNF1
ENSG00000285958		FGF12
RPS3AP34		PDLIM5
SORL1		GRIN2A
KCNQ4		ERVH48-1
MAFB		ENSG00000282890
APOL6		MISP3
DTWD2		MCAM
TCF4		ENSG00000274021
FGD4		JCAD
ENSG00000260412		SAT1
CDX4		LRATD1
SYBU		ENSG00000272555
LIMCH1		SMIM10
FBXL16		ADCY5
CYFIP2		LINC00632
ENSG00000255367		ESM1
FAM13C		HNRNPA1P33
KCNH7		PLXNA2
BEST1		MEIOC
DUSP6		LRRC1
ENSG00000250820		STYXL2
KNDC1		AMY2B
FNDC10		UNC13D
CLN8		SHANK1
BTG3-AS1		SH3RF3
USP9X		ENSG00000224307
QPCT		TBX6
DHRS3		PLXDC1
LINC02733		ENSG00000268416
SHC3		ENSG00000288985
ENSG00000285999		TSPAN13
SMIM14		IRF6
WIPF1		SYTL2
DGAT2		ENSG00000287683
SLC22A23		IRF1-AS1
ELL3		HMGB1P21
CRYL1		PPP1R12B
ZBTB38		SYT7
KCNG1		EDNRA
OSBPL10		LAYN
IRF6		ENSG00000279692
FCHO1		CYP27A1
FAM27E3		STARD13
GOLGA8A		HES4
JAKMIP1		ZBTB47
SYT7		ARHGEF37
SPATS2L		THEMIS2
EMILIN2		MANSC1
SHROOM2		WNT5A-AS1
C8orf48		LGALS8
TAP2		MET
WNK2		ZNF732
HCLS1		EVA1A
SMPD5		OPTN
KLF4		BTN3A2
RNF128		TNFSF9
ASNSP6		ENSG00000251188
BCAS4		ZNF826P
TMEM171		OXTR
CLDN6		ENSG00000286491
NIPAL3		ENSG00000223486
LINC01123		CCDC169-SOHLH2
PDZD2		ENSG00000215246
TOX3		LYN
ENSG00000289113		CAPN3
ARAP3		BVES-AS1
ENSG00000253967		SHBG
IGFBPL1		LINC01224
MYLIP		ENSG00000197462
ENPP7P1		ENSG00000289122
ECEL1		KLRG2
APLN		ABCA5
SERINC5		FAM111A
GPM6B		ZMAT4
TAS2R10		COL1A2
ENSG00000203279		RASSF5
KCNS3		LTBP3
COLCA2		APOL2
UGT8		ANO4
TUBB2B		CBS
CD38		DUBR
ENSG00000261068		KCNG3
ENSG00000236263		H2AC14
JARID2-DT		MPC1
ZBTB3		PRICKLE2
C1QL1		PROS1
TMSB4X		SPRYD3
TTC9		HPDL
SYPL2		FGF5
MET		GREM2
FBXO2		KCNK3
DENND2C		ARID5A
TMEM170B		ENSG00000280079
ADD2		RNF144B
TAP1		TMEM92
CEBPZOS		RRAGD
ENSG00000249363		CPEB2
GPR153		ENSG00000277476
HRH2		HSD3B7
MYB		PGM5
ENSG00000184441		HELLS
HDAC2-AS2		JAK1
COL25A1		ENSG00000279277
LRRC3		FAM184A
MESTIT1		KIAA0040
N4BP2L1		MTMR11
SEL1L3		RRAS
KLK10		GSN
MBOAT1		PLPP7
MAML3		JUN
SYNGR2		SYTL4
LRIG3		ACKR2
CRNDE		ANG
PLEKHG6		TMEM144
ENSG00000285943		ZNF436
UCHL1		ATOH8
UTRN		LRRTM1
ZNF398		OLFML1
TPPP		GAS2
TDGF1		GOLGA8N
ELF3		ENSG00000288085
RARRES2		LIMS4
PIK3IP1		SYN3
FRAT2		DUSP1
ENSG00000289224		KREMEN1
MPZ		DDX60
CRPPA		ENSG00000288953
ADAMTS1		CBX2
STEAP2		ENSG00000275160
ADGRB2		MAP1LC3A
SNHG7		TAPBPL
VCL		FAR2P3
NRIP1		CD47
ALDH3B1		BSPRY
ATP2A3		ABAT
MFAP4		ENSG00000282057
CHST8		COL21A1
KIF21A		ADCY9
ENSG00000224945		LHFPL2
STEAP1B		ADAMTS15
ATCAY		ENSG00000261888
ZNF878		ENSG00000287798
ENSG00000287733		GAS6-AS1
MIDEAS		LINC00957
MAN1C1		IL1RAPL1
ZNF578		KCP
ENSG00000288045		SLC25A12
STMN3		ZNF730
CACHD1		ZNF611
ZNF497		CCDC7
RAP2B		TUBB4A
MRAP2		NPTXR
ENSG00000269825		CCDC113
CDKL2		PIK3IP1
FAM161B		ENSG00000254602
GALNT13		CACNA1G
ZFPM1		ENSG00000271344
SPAG17		MST1L
ENSG00000253363		TNC
ENSG00000286757		POLR3G
KCNJ12		CDT1
FGFR2		KCNJ4
SKA1		MYO18A
TRNP1		BCAM
PLEKHF1		NACAD
YWHAZP4		PARP12
EXPH5		ENSG00000246792
PAWR		ZNF813
GEM		NCALD
ZC3HAV1L		KBTBD13
EPHA7		ANKRD34A
CACNG4		ZBTB20
PIF1		SGCA
ENSG00000268416		PHACTR1
ENSG00000280177		ATXN1-AS1
CFAP44		GAB3
AGRN		MYOM2
STEAP3		RAB40B
REP15		HAND2-AS1
ADAMTS2		IDH3A
PAIP2B		AQP7
ZNF521		GFOD1
ODC1-DT		SUSD6
USP2		MYL9
CD24		ACOT2
CERNA2		C11orf21
ENSG00000287329		METRNL
RNF125		DENND3
MBL1P		ST3GAL4
PPFIBP2		B3GALT1
TYRO3		CCN1
INPP4A		EPSTI1
TRIM71		H2AC16
COL9A3		LRRC8C
EIF2AK4		MIR99AHG
KCNK5		CAPN14
ANKRD13B		TAPBP
LAMA5		PHGDH
TRIB1		ENSG00000289291
MAP2K6		TKT
ITPR2		HID1
MBNL1		OSTF1
NSUN7		ENSG00000270066
WWC1		H2BC9
LINC01106		RTL8C
NUDT19		IGFBP6
GLIS3		ENSG00000280132
FBXL19-AS1		TAF4B
SRRM3		ZNF695
RILP		ENSG00000256101
LRP10		VASH1
CFAP410		TLE2
ZC3H12C		STX11
GLI2		PANX2
ZNF101		ENSG00000276649
FAM85B		CENPH
TENT5C		CCDC150
PTK7		TEX2
ASXL1		TENM4
GOLGA8B		KANK2
PVR		SBSPON
ENSG00000279369		SYNE4
POU5F1		RPS3AP26
CACNA1G		SCD5
PKIG		TMEM178A
TMCC3		MND1
PLPP1		SORBS1
MARCHF2		CLDN9
NUTM2D		NEK7
ANAPC1P1		ENSG00000253837
PRELID2		PRKAG2
OAZ2		ENSG00000237356
CTDSP1		WIPI1
RMI2		TMEFF1
HBP1		TONSL
RASSF4		SIAE
NFIC		ZFP36
TLE1		IMPA2
TAPBP		COL4A1
NBPF25P		CHN2
FYCO1		PER3
PTGES3L		MOB3C
SHROOM4		GIPR
CSPG4P11		ENSG00000280219
BAALC-AS1		IGIP
DAG1		SORCS2
PAXIP1-DT		TCEAL1
RFLNB		NEAT1
CYBA		APOC1
GLCCI1		ZMAT3
XPA		DPP7
PPM1B		HIPK3
MAD2L2		NIPSNAP3B
DNAJB6		DSCC1
FNDC3A		DPPA4
COQ3		BAIAP2L1
SELENOW		GTF2F2P1
TIAM1		RBMS3
EAF2		CMTM7
TRAF5		ENSG00000286039
TSPAN4		ALDH2
MT1E		ATP6V0E2
MT1G		GTF2IP7
MT1F		TMBIM1
MT2A		PANCR
ENSG00000260362		TMEM263
ENSG00000249988		LINC00963
LRRC4C		PRICKLE1
MT1H		ZNF710-AS1
IL33		RESF1
MT1L		ENSG00000267886
ENSG00000237316		MRAS
ENSG00000282278		ANKH
ENSG00000234350		MIR29B2CHG
MT1X		HS3ST3A1
ENSG00000223969		PRIM1
RFPL2		CDH24
PPP1R17		ENSG00000257207
ENSG00000234891		HERC3
TEX37		COL13A1
ENSG00000254587		ENSG00000284337
ENSG00000278875		TANC1
RGS8		PGPEP1
COL21A1		TRIB1
CBR3		SMAD9
PTPRB		MICAL3
PPP1R1B		TSPAN9
ENSG00000285982		ZNF878
TACR1		CLIP4
SERPINB9		COL4A2
ST8SIA5		ANK2
NTNG2		CHRNA7
GOLGA6D		DDIAS
MYC		TFEB
ENSG00000288940		TTC39A
TESC		CCDC69
NEFM		CHPF
ARMH1		NFKB1
RRM2B		RHOQ
GOLGA6C		PLIN4
GDF3		RCAN1
ENSG00000232110		LOXL4
PPFIA2		ARHGAP31
ITGB7		ENPP4
ECRG4		KCNJ2-AS1
MAPK10		ENSG00000267383
EDIL3		ENSG00000271959
TSHR		CENPV
LFNG		CENPO
HHIP		CFL2
SERPINE1		BMP4
SGK1		JAZF1
LINC02275		PCDHB10
LINC02885		PROCA1
SPATA16		CTH
TUBB6		PKN3
CNRIP1		FAM86DP
LIPH		ENSG00000277103
SAMD3		H2AC17
GLDC		ARL6IP5
TSHZ3		TRPV4
MICA		WNT3
CDKN1A		LMOD1
LINC02021		C18orf54
TSPAN13		CHAF1A
RHOXF1-AS1		ACACB
CDK14		WHAMMP3
TNS2		ENSG00000267868
SPOCK3		GREB1L
ATP5MC1		PPARGC1B
SPEF2		CRB2
CD177		ANXA2
RYR3		HASPIN
INPP5D		RPL29P19
GPC4		HIP1R
NBL1		ATP2A2
DPYSL5		CDC25A
GOLGA6B		ADRA2C
NETO1		PM20D2
SAPCD2		HECA
ACER2		ENSG00000279518
MAP3K21		DEPDC1B
ATP10A		H1-5
TSPEAR-AS1		WDHD1
UBXN10		RASGRP2
INA		RPL9P16
CDR2		XRCC2
ENSG00000234405		C11orf96
HSPA4L		STOX1
KIAA0930		C10orf82
MDFIC		FYCO1
ENSG00000241489		ENSG00000258824
JAG2		SHISA4
KPNA2		GUCY1B1
SLC22A15		LAMB1
SEC24D		MCM5
GOLGA6A		ENSG00000276075
CAPN6		ADRA2B
GNG4		H2BC14
CFAP43		ZNF540
MOB3B		ENSG00000289352
AKAP1		GPR146
LRRC9		GYG1
PARP1		AK1
JAZF1		SYNGR2
FLVCR2		APOBEC3G
SEMA3E		ENSG00000279118
LPAR3		PITPNM2
ACSL1		ATP1B1
ZNF432		MST1P2
LINC02018		ENSG00000280381
NECTIN1		ACOT1
NPTX2		H2AC13
WWP1		RTL8B
TMEM131		SLC22A5
HYDIN		CD27-AS1
ARSD		PXDC1
AR		LRP10
CCND3		FAM13A-AS1
IQGAP2		ZNF578
TGFBR3		PTP4A3
TRIM2		APOBEC3D
ACOT7		ENSG00000273733
SLC25A4		PALM2AKAP2
ANK2		PPFIA4
JPT1		ENSG00000250222
SNRPN		NUDT4
RRAGB		NDRG1
NDUFS6		MAP3K20
		ZDHHC14
		ITPRID2
		SRC
		H2BC18
		C12orf75
		CPEB3
		TUBA1A
		POLE
		HOXB2
		ADGRL3
		IRF9
		CCNB2
		SHMT1
		RHOBTB2
		LGI4
		TMEM38A
		DCAF12L1
		TOM1L2
		LINC01135
		CPNE8
		ARAP1
		ZFR2
		SOBP
		FAM86B3P
		CCDC138
		PSD3
		EMC3-AS1
		EHD4
		TMEM97
		C1orf198
		SYTL3
		CDC7
		COX14
		CDC6
		TTLL4
		UHRF1
		HSPB1
		ENSG00000093100
		ANTXR1
		PEA15
		MACROH2A2
		LINC02754
		CLTB
		ENSG00000256139
		LINC00954
		H2AC20
		HEG1
		FBXL7
		PPAT
		NEURL2
		CD59
		ZNF724
		PLBD1-AS1
		NASP
		E2F5
		ASPH
		SYNE1
		TIMELESS
		KLHL24
		COMMD3
		MAGI2
		ASB8
		TOR4A
		ITGAV
		ANO5
		ATXN1
		ENSG00000231859
		ZNF788P
		UQCRQ
		ASAH1
		ARMCX3
		ITGB3BP
		ZNF682
		CCDC136
		MTARC1
		TACC1
		SEMA6A
		HCFC2
		CA3-AS1
		BCL2L12
		RCC1
		TRAK2
		CTSB
		ENSG00000261101
		AAMDC
		LMNA
		ETFDH
		DNA2
		SVOPL
		CSNK2A2
		PHTF2
		RIN2
		ITGB1BP1
		GAB1
		C6orf89
		NIPAL3
		WHAMM
		CTF1
		PUS7
		RIPOR1
		ENSG00000279726
		CRAT
		MUTYH
		ZNF704
		AAK1
		SKA3
		ENSG00000274292
		ZBTB4
		SERINC1
		CHD1L
		MCM7
		ZNF589
		NOP56
		ALDH7A1
		SMYD1
		ENSG00000232939
		LHX1
		TECRL
		XIRP1
		ENSG00000267744
		UNC45B
		ENSG00000262920
		ENSG00000288781
		ENSG00000231811
		LHX1-DT
		ENSG00000234273
		KCNE1B
		SHISA6
		MYL7
		EVX1-AS
		DMBX1
		CAPN13
		TNNI1
		TTN
		ANKRD1
		ENSG00000223930
		ZNF560
		MIR1-1HG-AS1
		CORO7-PAM16
		ENSG00000224536
		TMPRSS11E
		ACTC1
		LINC01124
		OIT3
		ATP8B4
		ENSG00000254293
		ENSG00000286478
		ENSG00000229962
		TRIM55
		ZIC3
		CHAC1
		TPO
		CACNA1C
		ENSG00000254202
		DISP3
		FLI1
		KCNA1
		NPPB
		ESR1
		PTPN5
		PCSK9
		DYSF
		KCNIP4
		CHRNA9
		ARSL
		NEXN
		GRIK3
		TLCD4
		RASSF4
		NEBL
		FOXA3
		JPH2
		ENSG00000289089
		SEZ6L
		CALCR
		ZIC5
		CNTN5
		RNF207
		ENSG00000260398
		CCDC80
		EVX1
		GDAP1L1
		LHFPL4
		EMX1
		PAX7
		ENSG00000268896
		ENSG00000255583
		INHBE
		M1AP
		CDA
		ENSG00000283201
		ENSG00000288111
		ZIC2
		AQP10
		TRIM54
		DPF3
		NIPAL4
		ENSG00000286468
		CTNNA3
		PRSS44P
		C10orf71
		RNF150
		SAMD4A
		MYL4
		LINC01460
		TBX20
		TEX15
		IGSF21
		PPP1R3C
		ENSG00000288947
		FST
		PRSS43P
		ENO3
		UGT3A1
		ENSG00000284294
		TMEM190
		S100A4
		ASNS
		DRAXIN
		ENSG00000261553
		PALLD
		ENSG00000278934
		GCNT1
		SFRP5
		SELPLG
		GRIA4
		PPP1R13B
		CLVS2
		C6orf136
		BCO2
		ADSS1
		MCF2L-AS1
		TPM1
		ERBB4
		SNAI1
		LMO3
		BRINP1
		FPGT-TNNI3K
		ODAM
		ADAMTSL4
		SMIM24
		LINC00479
		ATP6V1G2
		PYGM
		SENP3-EIF4A1
		CDH23
		LZTS1
		RGMA
		CHRNB4
		TUBB2B
		MTRNR2L8
		MTURN
		MYOCD
		CPEB4
		ENSG00000257252
		USH2A
		PAX6
		ENSG00000236701
		CNN1
		DDN
		TOP1MT
		ELMO1
		TBC1D8-AS1
		CACNG7
		HRAT92
		CITED4
		DTX1
		SLIT3
		TSPAN2
		TOX
		PRKCE
		ANXA3
		ABLIM1
		HS3ST1
		MAFK
		SERPINE2
		ADCYAP1R1
		NLGN1
		MTRNR2L12
		SCAND2P
		PCOLCE2
		RCSD1
		APOC1P1
		KCNQ2
		PROX1
		CARMIL2
		USP2
		ENPEP
		GRIN2B
		INKA2-AS1
		GGT3P
		TGFB2
		IFIT1
		RAB3IP
		CXCR4
		OTX2
		ACE2
		PPIC
		GNPNAT1
		PTPRE
		HTR1D
		HCN4
		KCTD14
		TACR3
		CNMD
		TAC3
		CDC42EP3
		MXRA7
		SNHG26
		RILP
		SSH2
		FRMPD2
		SULT1C4
		PTPRR
		PLEKHA7
		TMC5
		ENSG00000288973
		LBH
		PLCB4
		SESN2
		LINC00158
		BMP7
		EHD3
		CHL1
		MT-ND5
		TANC2
		LTBP1
		PYGB
		EBF2
		B3GAT1
		PLAAT1
		SLC2A4
		ENSG00000258461
		CCDC141
		GPC1
		IL11
		ST8SIA3
		RN7SL689P
		ITLN2
		REPS2
		TMEM65
		STK39
		ADM2
		SBF2-AS1
		MEF2A
		EPB41L4A
		KCNN2
		RYR1
		ENSG00000278192
		MBNL2
		PPM1K
		ANKRD30B
		MGST3
		COMTD1
		ZFPM2
		TOB1-AS1
		LINC02525
		WFDC2
		GUCY1A1
		PNPLA3
		NNT
		SVIL
		IGLON5
		RNF208
		ATP6V0E2-AS1
		ANKRD9
		C19orf12
		GOT1
		ATP1A1
		ADCY2
[truncated: 340 more rows]

## Sheet: Supplemental Table S3
Supplemental Table S3. Identified DTA with coding potential change in at least one transcript variant
Isoform ID	Gene ID	Condition 1 (C1)	Condition 2 (C2)	Gene Biotype	Isoform Biotype	IF1	IF2	dIF	codingPotentialValue	codingPotential	noncoding form FC direction
ENST00000567490,1	AARS1	D30	D4	protein_coding	retained_intron	0.00865	0.04595	0.0373	0.0400747	FALSE	downregulated
ENST00000676211.1	AARS1	D30	D4	protein_coding	nonsense_mediated_decay	0.02765	0.143925	0.116275	1	TRUE
ENST00000676168.1	AARS1	D30	D4	protein_coding	nonsense_mediated_decay	0.01055	0.11775	0.1072	1	TRUE
ENST00000592568.1	ABCA5	D30	D4	protein_coding	protein_coding	0	0.117125	0.117125	NA	NA
ENST00000588877.5	ABCA5	D30	D4	protein_coding	protein_coding	0.163425	0.03505	-0.128375	NA	NA
ENST00000578270.5	ABHD3	D30	D4	protein_coding	protein_coding	0.2544	0.077125	-0.177275	0.990416	TRUE
ENST00000376166.5	ABI1	D30	D4	protein_coding	protein_coding	0.0586	0.24355	0.18495	1	TRUE
ENST00000376140.4	ABI1	D30	D4	protein_coding	protein_coding	0.206675	0	-0.206675	1	TRUE
ENST00000533855.5	ABI3BP	D30	D4	protein_coding	protein_coding	0.07895	0	-0.07895	NA	NA
ENST00000497021.1	ABI3BP	D30	D4	protein_coding	retained_intron	0.004625	0.29415	0.289525	NA	NA
ENST00000318560.6	ABL1	D30	D4	protein_coding	protein_coding	0.421975	0.67845	0.256475	1	TRUE
ENST00000428430,1	ABLIM1	D30	D4	protein_coding	protein_coding	0.00455	0.05445	0.0499	0.126137	FALSE	downregulated
ENST00000440467,5	ABLIM1	D30	D4	protein_coding	protein_coding	0.02855	0.47495	0.4464	0.153508	FALSE	downregulated
ENST00000651092.1	ABLIM1	D30	D4	protein_coding	protein_coding	0.2722	0.0596	-0.2126	0.61879	TRUE
ENST00000651023.1	ABLIM1	D30	D4	protein_coding	protein_coding	0.166825	0	-0.166825	0.703657	TRUE
ENST00000369253.6	ABLIM1	D30	D4	protein_coding	protein_coding	0.00755	0.117125	0.109575	1	TRUE
ENST00000285093.15	ACAA2	D30	D4	protein_coding	protein_coding	0.18465	0.087175	-0.097475	1	TRUE
ENST00000539864,1	ACACB	D30	D4	protein_coding	protein_coding	0.25845	0	-0.25845	0.202651	FALSE	upregulated
ENST00000537347,1	ACACB	D30	D4	protein_coding	retained_intron	0.1315	0.016525	-0.114975	0.13062	FALSE	upregulated
ENST00000396233,4	ACACB	D30	D4	protein_coding	retained_intron	0.128925	0.2672	0.138275	0.0385284	FALSE	downregulated
ENST00000544726,2	ACACB	D30	D4	protein_coding	protein_coding	0.033375	0.17965	0.146275	0.181522	FALSE	downregulated
ENST00000537279.1	ACACB	D30	D4	protein_coding	retained_intron	0.0316	0.110075	0.078475	0.946018	TRUE
ENST00000377848.7	ACACB	D30	D4	protein_coding	protein_coding	0	0.092925	0.092925	1	TRUE
ENST00000356839.10	ACADVL	D30	D4	protein_coding	protein_coding	0.4432	0.106025	-0.337175	1	TRUE
ENST00000678788.1	ACO2	D30	D4	protein_coding	protein_coding	0.000825	0.147375	0.14655	1	TRUE
ENST00000677554.1	ACO2	D30	D4	protein_coding	protein_coding	0.16265	0.040525	-0.122125	1	TRUE
ENST00000676883.1	ACO2	D30	D4	protein_coding	retained_intron	0.009475	0.0239	0.014425	0.861317	TRUE
ENST00000466237.2	ACO2	D30	D4	protein_coding	protein_coding	0.056225	0.205275	0.14905	1	TRUE
ENST00000498228.1	ACOT11	D30	D4	protein_coding	processed_transcript	0.11265	0.29795	0.1853	0.998377	TRUE
ENST00000336430.11	ACOT9	D30	D4	protein_coding	protein_coding	0.418375	0.58815	0.169775	1	TRUE
ENST00000467738.1	ACOX2	D30	D4	protein_coding	retained_intron	0	0.098325	0.098325	0.999999	TRUE
ENST00000302819.10	ACOX2	D30	D4	protein_coding	protein_coding	0.091825	0	-0.091825	1	TRUE
ENST00000614721,1	ACSM3	D30	D4	protein_coding	processed_transcript	0.30745	0.024675	-0.282775	0.434055	FALSE	upregulated
ENST00000564701,1	ACSM3	D30	D4	protein_coding	protein_coding	0.039875	0.003125	-0.03675	0.0226834	FALSE	upregulated
ENST00000253382.5	ACSS2	D30	D4	protein_coding	protein_coding	0.167025	0	-0.167025	1	TRUE
ENST00000684598.1	ACTN1	D30	D4	protein_coding	protein_coding	0.1593	0	-0.1593	1	TRUE
ENST00000683225.1	ACTN1	D30	D4	protein_coding	protein_coding	0.0396	0.0169	-0.0227	1	TRUE
ENST00000553882.2	ACTN1	D30	D4	protein_coding	retained_intron	0.039	0.007275	-0.031725	0.853186	TRUE
ENST00000683075,1	ACTN2	D30	D4	protein_coding	retained_intron	0.039425	0.11465	0.075225	0.0900557	FALSE	downregulated
ENST00000684122.1	ACTN2	D30	D4	protein_coding	retained_intron	0.03155	0.097825	0.066275	0.997021	TRUE
ENST00000683322.1	ACTN2	D30	D4	protein_coding	retained_intron	0.0148	0.080925	0.066125	1	TRUE
ENST00000683111.1	ACTN2	D30	D4	protein_coding	nonsense_mediated_decay	0	0.123025	0.123025	1	TRUE
ENST00000682966.1	ACTN2	D30	D4	protein_coding	retained_intron	0.07645	0.23565	0.1592	1	TRUE
ENST00000682692.1	ACTN2	D30	D4	protein_coding	retained_intron	0	0.045925	0.045925	1	TRUE
ENST00000651786.1	ACTN2	D30	D4	protein_coding	nonsense_mediated_decay	0.265725	0	-0.265725	1	TRUE
ENST00000542672.6	ACTN2	D30	D4	protein_coding	protein_coding	0.002325	0.1314	0.129075	1	TRUE
ENST00000366578.6	ACTN2	D30	D4	protein_coding	protein_coding	0.45155	0.003575	-0.447975	1	TRUE
ENST00000495553.1	ACTN4	D30	D4	protein_coding	processed_transcript	0.0091	0.176275	0.167175	NA	NA
ENST00000407644.6	ADD2	D30	D4	protein_coding	protein_coding	0.189375	0.4239	0.234525	1	TRUE
ENST00000264436.9	ADD2	D30	D4	protein_coding	protein_coding	0.6804	0.3638	-0.3166	1	TRUE
ENST00000488799,5	ADD3	D30	D4	protein_coding	processed_transcript	0.038925	0.155075	0.11615	0.0594034	FALSE	downregulated
ENST00000475954.5	ADD3	D30	D4	protein_coding	processed_transcript	0.110625	0.2858	0.175175	0.633229	TRUE
ENST00000360162.7	ADD3	D30	D4	protein_coding	protein_coding	0.04485	0.005875	-0.038975	1	TRUE
ENST00000356080.9	ADD3	D30	D4	protein_coding	protein_coding	0.097675	0.325	0.227325	1	TRUE
ENST00000277900.12	ADD3	D30	D4	protein_coding	protein_coding	0.444025	0	-0.444025	1	TRUE
ENST00000357991.7	ADGRG2	D30	D4	protein_coding	protein_coding	0	0.365175	0.365175	1	TRUE
ENST00000296932.13	ADGRG6	D30	D4	protein_coding	protein_coding	0.3383	0	-0.3383	1	TRUE
ENST00000468283,1	ADGRL2	D30	D4	protein_coding	processed_transcript	0.029875	0.01465	-0.015225	0.0480842	FALSE	upregulated
ENST00000686636.1	ADGRL2	D30	D4	protein_coding	protein_coding	0.064875	0.026075	-0.0388	1	TRUE
ENST00000674419.1	ADGRL2	D30	D4	protein_coding	protein_coding	0.181525	0.0076	-0.173925	1	TRUE
ENST00000674367.1	ADGRL2	D30	D4	protein_coding	retained_intron	0.054125	0.02435	-0.029775	1	TRUE
ENST00000472424.2	ADGRL2	D30	D4	protein_coding	retained_intron	0.04745	0.0245	-0.02295	0.998845	TRUE
ENST00000609540.1	ADPRM	D30	D4	protein_coding	protein_coding	0.01915	0.421125	0.401975	0.999999	TRUE
ENST00000473312.5	AGAP3	D30	D4	protein_coding	protein_coding	0.165525	0.00985	-0.155675	1	TRUE
ENST00000409979.6	AGFG1	D30	D4	protein_coding	protein_coding	0.148075	0.0005	-0.147575	1	TRUE
ENST00000310078.13	AGFG1	D30	D4	protein_coding	protein_coding	0.361375	0.220225	-0.14115	1	TRUE
ENST00000370163.7	AGL	D30	D4	protein_coding	protein_coding	0.37195	0.010975	-0.360975	1	TRUE
ENST00000361915.8	AGL	D30	D4	protein_coding	protein_coding	0.120175	0.63085	0.510675	1	TRUE
ENST00000294724.8	AGL	D30	D4	protein_coding	protein_coding	0.2823	0.125625	-0.156675	1	TRUE
ENST00000373204.6	AGO1	D30	D4	protein_coding	protein_coding	0.51455	0.73555	0.221	1	TRUE
ENST00000491784,3	AGTPBP1	D30	D4	protein_coding	processed_transcript	0.169825	0.0672	-0.102625	0.268232	FALSE	upregulated
ENST00000376081.8	AGTPBP1	D30	D4	protein_coding	processed_transcript	0.0291	0.21485	0.18575	0.999235	TRUE
ENST00000550338,5	AK2	D30	D4	protein_coding	nonsense_mediated_decay	0.1533	0.0365	-0.1168	0.182431	FALSE	upregulated
ENST00000672715.1	AK2	D30	D4	protein_coding	protein_coding	0.09745	0	-0.09745	0.968627	TRUE
ENST00000373449.7	AK2	D30	D4	protein_coding	protein_coding	0.01225	0.2151	0.20285	0.990357	TRUE
ENST00000680534.1	AKAP9	D30	D4	protein_coding	protein_coding	0.166175	0.0027	-0.163475	1	TRUE
ENST00000680074.1	AKAP9	D30	D4	protein_coding	retained_intron	0.04955	0.018	-0.03155	1	TRUE
ENST00000491695.2	AKAP9	D30	D4	protein_coding	protein_coding	0.08565	0.042125	-0.043525	1	TRUE
ENST00000621846.4	AKR1A1	D30	D4	protein_coding	protein_coding	0.4698	0.171175	-0.298625	1	TRUE
ENST00000471651.1	AKR1A1	D30	D4	protein_coding	protein_coding	0.128475	0.222425	0.09395	0.679791	TRUE
ENST00000673466.1	AKT3	D30	D4	protein_coding	protein_coding	0.150525	0.038425	-0.1121	NA	NA
ENST00000563060.6	ALDOA	D30	D4	protein_coding	protein_coding	0.07665	0.185	0.10835	NA	NA
ENST00000462121.1	ANKHD1	D30	D4	protein_coding	processed_transcript	0.105175	0.011225	-0.09395	0.996663	TRUE
ENST00000360839.7	ANKHD1	D30	D4	protein_coding	protein_coding	0.0455	0.1291	0.0836	1	TRUE
ENST00000650178.1	ANKS1A	D30	D4	protein_coding	protein_coding	0	0.1559	0.1559	0.964792	TRUE
ENST00000649117.1	ANKS1A	D30	D4	protein_coding	protein_coding	0.16115	0.020975	-0.140175	1	TRUE
ENST00000682428.1	ANO5	D30	D4	protein_coding	processed_transcript	0.000475	0.0303	0.029825	0.576292	TRUE
ENST00000324559.9	ANO5	D30	D4	protein_coding	protein_coding	0.132625	0	-0.132625	1	TRUE
ENST00000372921.10	ANXA7	D30	D4	protein_coding	protein_coding	0.0656	0.294875	0.229275	1	TRUE
ENST00000372919.8	ANXA7	D30	D4	protein_coding	protein_coding	0.61275	0.181925	-0.430825	1	TRUE
ENST00000479184.2	AP1S2	D30	D4	protein_coding	nonsense_mediated_decay	0.04535	0.1237	0.07835	0.746809	TRUE
ENST00000329235.6	AP1S2	D30	D4	protein_coding	protein_coding	0.5054	0.152075	-0.353325	0.987955	TRUE
ENST00000561455,5	AP3B2	D30	D4	protein_coding	processed_transcript	0.51675	0.007175	-0.509575	0.242917	FALSE	upregulated
ENST00000555448,5	AP5M1	D30	D4	protein_coding	nonsense_mediated_decay	0.183075	0.029175	-0.1539	0.118708	FALSE	upregulated
ENST00000534001,1	APLP2	D30	D4	protein_coding	processed_transcript	0.006375	0.259425	0.25305	0.106431	FALSE	downregulated
ENST00000338167.10	APLP2	D30	D4	protein_coding	protein_coding	0.420825	0.245675	-0.17515	1	TRUE
ENST00000463934,1	APOBEC3G	D30	D4	protein_coding	retained_intron	0.3552	0.07785	-0.27735	0.0916328	FALSE	upregulated
ENST00000407997.4	APOBEC3G	D30	D4	protein_coding	protein_coding	0.4313	0.7679	0.3366	1	TRUE
ENST00000588750,5	APOC1	D30	D4	protein_coding	protein_coding	0.162225	0.0011	-0.161125	0.307116	FALSE	upregulated
ENST00000592535,6	APOC1	D30	D4	protein_coding	protein_coding	0.500475	0.8148	0.314325	0.25448	FALSE	downregulated
ENST00000429686.5	ARAP1	D30	D4	protein_coding	protein_coding	0.0629	0.159	0.0961	1	TRUE
ENST00000334211.12	ARAP1	D30	D4	protein_coding	protein_coding	0.433025	0.11465	-0.318375	1	TRUE
ENST00000681656.1	ARFGEF2	D30	D4	protein_coding	nonsense_mediated_decay	0.036825	0.219075	0.18225	1	TRUE
ENST00000400198.8	ARGLU1	D30	D4	protein_coding	protein_coding	0.0631	0.040625	-0.022475	0.981603	TRUE
ENST00000509709,1	ARHGAP24	D30	D4	protein_coding	retained_intron	0.103025	0.0024	-0.100625	0.0149336	FALSE	upregulated
ENST00000509300,5	ARHGAP24	D30	D4	protein_coding	protein_coding	0.04685	0	-0.04685	0.0883896	FALSE	upregulated
ENST00000506421.5	ARHGAP24	D30	D4	protein_coding	processed_transcript	0.109175	0.014925	-0.09425	0.778254	TRUE
ENST00000395183.6	ARHGAP24	D30	D4	protein_coding	protein_coding	0.129	0.345225	0.216225	1	TRUE
ENST00000578442.1	ARHGAP44	D30	D4	protein_coding	retained_intron	0.125125	0.0136	-0.111525	0.974309	TRUE
ENST00000544416.6	ARHGAP44	D30	D4	protein_coding	nonsense_mediated_decay	0.033175	0.2269	0.193725	1	TRUE
ENST00000617585,1	ARHGEF1	D30	D4	protein_coding	retained_intron	0.1086	0.01085	-0.09775	0.21649	FALSE	upregulated
ENST00000382795.7	ARHGEF10	D30	D4	protein_coding	processed_transcript	0.141	0.0225	-0.1185	NA	NA
ENST00000375408.7	ARHGEF10L	D30	D4	protein_coding	protein_coding	0.361575	0.045	-0.316575	1	TRUE
ENST00000167825.5	ARHGEF10L	D30	D4	protein_coding	nonsense_mediated_decay	0.0433	0.373825	0.330525	1	TRUE
ENST00000475323.5	ARHGEF39	D30	D4	protein_coding	nonsense_mediated_decay	0.0616	0.34215	0.28055	0.924547	TRUE
ENST00000409359.7	ARHGEF4	D30	D4	protein_coding	protein_coding	0	0.1956	0.1956	1	TRUE
ENST00000637520.1	ARHGEF9	D30	D4	protein_coding	protein_coding	0.03	0.0056	-0.0244	1	TRUE
ENST00000637417.1	ARHGEF9	D30	D4	protein_coding	protein_coding	0.075675	0.013025	-0.06265	1	TRUE
ENST00000635729.1	ARHGEF9	D30	D4	protein_coding	protein_coding	0.026175	0.496275	0.4701	1	TRUE
ENST00000624210.3	ARHGEF9	D30	D4	protein_coding	protein_coding	0.319275	0.026675	-0.2926	1	TRUE
ENST00000374872.4	ARHGEF9	D30	D4	protein_coding	protein_coding	0.036825	0.008775	-0.02805	1	TRUE
ENST00000425034.6	ARL6IP6	D30	D4	protein_coding	nonsense_mediated_decay	0.004525	0.04145	0.036925	NA	NA
ENST00000455331.6	ARMCX4	D30	D4	protein_coding	nonsense_mediated_decay	0	0.133875	0.133875	1	TRUE
ENST00000380009.9	ARSK	D30	D4	protein_coding	protein_coding	0.59855	0.34555	-0.253	1	TRUE
ENST00000637840,1	ASAH1	D30	D4	protein_coding	retained_intron	0.013325	0.05005	0.036725	0.0133753	FALSE	downregulated
ENST00000381733.9	ASAH1	D30	D4	protein_coding	protein_coding	0.02265	0.078725	0.056075	1	TRUE
ENST00000444334.5	ASNS	D30	D4	protein_coding	protein_coding	0	0.20275	0.20275	1	TRUE
ENST00000394308.8	ASNS	D30	D4	protein_coding	protein_coding	0	0.062125	0.062125	1	TRUE
ENST00000518306,5	ASPH	D30	D4	protein_coding	protein_coding	0.27125	0.0797	-0.19155	0.426987	FALSE	upregulated
ENST00000522036,1	ASPH	D30	D4	protein_coding	retained_intron	0.0696	0.03345	-0.03615	0.0765111	FALSE	upregulated
ENST00000523897,5	ASPH	D30	D4	protein_coding	processed_transcript	0.009975	0.0337	0.023725	0.0129867	FALSE	downregulated
ENST00000541428.5	ASPH	D30	D4	protein_coding	protein_coding	0.119725	0.2582	0.138475	1	TRUE
ENST00000522603.5	ASPH	D30	D4	protein_coding	protein_coding	0.045425	0	-0.045425	0.9974	TRUE
ENST00000519678.5	ASPH	D30	D4	protein_coding	protein_coding	0.060825	0.222775	0.16195	0.911219	TRUE
ENST00000379454.9	ASPH	D30	D4	protein_coding	protein_coding	0.04955	0.114675	0.065125	1	TRUE
ENST00000534257,1	ATAD2	D30	D4	protein_coding	processed_transcript	0.01325	0.063175	0.049925	0.131078	FALSE	downregulated
ENST00000550993,1	ATAD2	D30	D4	protein_coding	retained_intron	0.070075	0.20315	0.133075	0.0136462	FALSE	downregulated
ENST00000519124.5	ATAD2	D30	D4	protein_coding	nonsense_mediated_decay	0.002925	0.02305	0.020125	NA	NA
ENST00000287394.10	ATAD2	D30	D4	protein_coding	protein_coding	0.733875	0.558125	-0.17575	1	TRUE
ENST00000529655.5	ATG13	D30	D4	protein_coding	protein_coding	0.11295	0.2402	0.12725	1	TRUE
ENST00000526508.5	ATG13	D30	D4	protein_coding	protein_coding	0.099375	0.009375	-0.09	1	TRUE
ENST00000392020.8	ATG16L1	D30	D4	protein_coding	protein_coding	0.0279	0.3766	0.3487	1	TRUE
ENST00000392018.1	ATG16L1	D30	D4	protein_coding	protein_coding	0.330025	0.008325	-0.3217	1	TRUE
ENST00000547050,1	ATP2A2	D30	D4	protein_coding	retained_intron	0.03125	0.15565	0.1244	0.346205	FALSE	downregulated
ENST00000550262.1	ATP2A2	D30	D4	protein_coding	retained_intron	0.00945	0.02495	0.0155	0.55088	TRUE
ENST00000539276.7	ATP2A2	D30	D4	protein_coding	protein_coding	0.01365	0.1589	0.14525	1	TRUE
ENST00000377685.9	ATP2A2	D30	D4	protein_coding	nonsense_mediated_decay	0.064375	0.53675	0.472375	1	TRUE
ENST00000313432.5	ATP2A2	D30	D4	protein_coding	retained_intron	0.0376	0.01565	-0.02195	0.712345	TRUE
ENST00000308664.10	ATP2A2	D30	D4	protein_coding	protein_coding	0.792725	0.063625	-0.7291	1	TRUE
ENST00000359142.7	ATP2B1	D30	D4	protein_coding	protein_coding	0.116875	0.003725	-0.11315	NA	NA
ENST00000356729,5	ATP2B4	D30	D4	protein_coding	protein_coding	0.064975	0.017775	-0.0472	0.208753	FALSE	upregulated
ENST00000367218.7	ATP2B4	D30	D4	protein_coding	protein_coding	0.562025	0.348275	-0.21375	1	TRUE
ENST00000357681.10	ATP2B4	D30	D4	protein_coding	protein_coding	0.0963	0.4047	0.3084	1	TRUE
ENST00000341360.6	ATP2B4	D30	D4	protein_coding	protein_coding	0.253375	0.184075	-0.0693	1	TRUE
ENST00000356708.12	ATP5F1C	D30	D4	protein_coding	protein_coding	0.021875	0.517525	0.49565	0.999994	TRUE
ENST00000335698.4	ATP5F1C	D30	D4	protein_coding	protein_coding	0.77525	0.22415	-0.5511	0.999993	TRUE
ENST00000691456.1	ATP7A	D30	D4	protein_coding	retained_intron	0.065975	0.1847	0.118725	1	TRUE
ENST00000341514.11	ATP7A	D30	D4	protein_coding	protein_coding	0.220025	0	-0.220025	1	TRUE
ENST00000492233,5	ATPAF1	D30	D4	protein_coding	protein_coding	0.036525	0.271925	0.2354	0.0582542	FALSE	downregulated
ENST00000664521,1	AUTS2	D30	D4	protein_coding	protein_coding	0.244325	0.033475	-0.21085	0.110551	FALSE	upregulated
ENST00000659051,1	AUTS2	D30	D4	protein_coding	nonsense_mediated_decay	0.111675	0.025825	-0.08585	0.0196668	FALSE	upregulated
ENST00000481994.1	AUTS2	D30	D4	protein_coding	retained_intron	0.013375	0.056425	0.04305	0.892239	TRUE
ENST00000403018.3	AUTS2	D30	D4	protein_coding	protein_coding	0.066225	0.03115	-0.035075	0.994921	TRUE
ENST00000540836.1	B4GALNT3	D30	D4	protein_coding	retained_intron	0.0235	0	-0.0235	NA	NA
ENST00000322843.3	B4GALNT3	D30	D4	protein_coding	protein_coding	0.4408	0.588675	0.147875	NA	NA
ENST00000602066.5	BABAM1	D30	D4	protein_coding	protein_coding	0.224975	0.14435	-0.080625	0.5	TRUE
ENST00000509916,5	BACE1	D30	D4	protein_coding	retained_intron	0	0.081225	0.081225	0.0315176	FALSE	downregulated
ENST00000294905,4	BAZ2B	D30	D4	protein_coding	protein_coding	0.242575	0.017775	-0.2248	0.226715	FALSE	upregulated
ENST00000588303,1	BCAM	D30	D4	protein_coding	retained_intron	0.0519	0.301325	0.249425	0.315303	FALSE	downregulated
ENST00000270233.12	BCAM	D30	D4	protein_coding	protein_coding	0.58395	0.396325	-0.187625	1	TRUE
ENST00000476194,1	BCLAF1	D30	D4	protein_coding	retained_intron	0.0656	0.017275	-0.048325	0.088139	FALSE	upregulated
ENST00000529917.5	BCLAF1	D30	D4	protein_coding	processed_transcript	0.02965	0.0089	-0.02075	0.52478	TRUE
ENST00000527613.5	BCLAF1	D30	D4	protein_coding	nonsense_mediated_decay	0.090875	0.0443	-0.046575	1	TRUE
ENST00000534122.5	BCO2	D30	D4	protein_coding	retained_intron	0.012925	0.122875	0.10995	0.650862	TRUE
ENST00000494860.5	BCO2	D30	D4	protein_coding	retained_intron	0.031625	0.289575	0.25795	0.999999	TRUE
ENST00000438022.5	BCO2	D30	D4	protein_coding	protein_coding	0.146325	0	-0.146325	1	TRUE
ENST00000375512.3	BICD2	D30	D4	protein_coding	protein_coding	0.865825	0.43185	-0.433975	1	TRUE
ENST00000356884.11	BICD2	D30	D4	protein_coding	protein_coding	0.134175	0.56815	0.433975	1	TRUE
ENST00000592115,5	BIRC5	D30	D4	protein_coding	retained_intron	0.221925	0.1188	-0.103125	0.0731591	FALSE	upregulated
ENST00000589892,1	BIRC5	D30	D4	protein_coding	processed_transcript	0.00245	0.186925	0.184475	0.139948	FALSE	downregulated
ENST00000481069,1	BIVM	D30	D4	protein_coding	processed_transcript	0.01975	0.254625	0.234875	0.0250353	FALSE	downregulated
ENST00000681142.1	BLM	D30	D4	protein_coding	protein_coding	0	0.3908	0.3908	1	TRUE
ENST00000355112.8	BLM	D30	D4	protein_coding	protein_coding	0.8334	0.322875	-0.510525	1	TRUE
ENST00000565409,5	BLOC1S6	D30	D4	protein_coding	protein_coding	0.03715	0.128475	0.091325	0.170597	FALSE	downregulated
ENST00000520626.6	BMP1	D30	D4	protein_coding	nonsense_mediated_decay	0.13875	0	-0.13875	1	TRUE
ENST00000650544.1	BMPER	D30	D4	protein_coding	protein_coding	0	0.045225	0.045225	1	TRUE
ENST00000306378.11	BPTF	D30	D4	protein_coding	protein_coding	0.005875	0.114325	0.10845	1	TRUE
ENST00000644969.2	BRAF	D30	D4	protein_coding	protein_coding	0.125375	0.005075	-0.1203	NA	NA
ENST00000496384.7	BRAF	D30	D4	protein_coding	protein_coding	0.172225	0.33415	0.161925	NA	NA
ENST00000682477.1	BRIP1	D30	D4	protein_coding	nonsense_mediated_decay	0.45745	0.291925	-0.165525	1	TRUE
ENST00000683743.1	BRPF1	D30	D4	protein_coding	protein_coding	0	0.156275	0.156275	NA	NA
ENST00000493173,1	BTN2A1	D30	D4	protein_coding	protein_coding	0.119675	0.521475	0.4018	0.0419272	FALSE	downregulated
ENST00000361232.7	BTN3A3	D30	D4	protein_coding	protein_coding	0.108575	0	-0.108575	1	TRUE
ENST00000473447,1	BUD31	D30	D4	protein_coding	retained_intron	0.0114	0.21245	0.20105	0.0176725	FALSE	downregulated
ENST00000410110.6	BZW1	D30	D4	protein_coding	protein_coding	0.10235	0.286375	0.184025	0.531017	TRUE
ENST00000337843.7	C1QTNF6	D30	D4	protein_coding	protein_coding	0.6779	0.3051	-0.3728	0.999904	TRUE
ENST00000423384,5	C1S	D30	D4	protein_coding	protein_coding	0	0.07935	0.07935	0.0393257	FALSE	downregulated
ENST00000543187,5	C1S	D30	D4	protein_coding	processed_transcript	0	0.139525	0.139525	0.393652	FALSE	downregulated
ENST00000406697.5	C1S	D30	D4	protein_coding	protein_coding	0	0.304	0.304	1	TRUE
ENST00000360817.10	C1S	D30	D4	protein_coding	protein_coding	0.353625	0	-0.353625	1	TRUE
ENST00000482186.5	C2CD2	D30	D4	protein_coding	retained_intron	0.187825	0.04105	-0.146775	NA	NA
ENST00000467074.6	C2CD2	D30	D4	protein_coding	retained_intron	0.13495	0.01215	-0.1228	NA	NA
ENST00000602053.1	C3	D30	D4	protein_coding	retained_intron	0.006375	0.073175	0.0668	NA	NA
ENST00000594270.5	C3	D30	D4	protein_coding	processed_transcript	0.172875	0	-0.172875	NA	NA
ENST00000245907.11	C3	D30	D4	protein_coding	protein_coding	0.2222	0.13375	-0.08845	NA	NA
ENST00000517697,6	CA3-AS1	D30	D4	lncRNA	lncRNA	0.2626	0.00685	-0.25575	0.0674368	FALSE	upregulated
ENST00000541871,1	CACNA1C	D30	D4	protein_coding	processed_transcript	0.220725	0	-0.220725	0.00884077	FALSE	upregulated
ENST00000682544.1	CACNA1C	D30	D4	protein_coding	protein_coding	0.21435	0.074875	-0.139475	1	TRUE
ENST00000481085,5	CACNA1D	D30	D4	protein_coding	protein_coding	0.07605	0	-0.07605	0.22608	FALSE	upregulated
ENST00000498251,2	CACNA1D	D30	D4	protein_coding	processed_transcript	0.103325	0.6933	0.589975	0.00831589	FALSE	downregulated
ENST00000636480.1	CACNA1D	D30	D4	protein_coding	retained_intron	0.51145	0.114975	-0.396475	0.998092	TRUE
ENST00000651896.1	CACNB2	D30	D4	protein_coding	processed_transcript	0.11075	0.43515	0.3244	0.545315	TRUE
ENST00000396576.6	CACNB2	D30	D4	protein_coding	protein_coding	0.0736	0.0188	-0.0548	1	TRUE
ENST00000282343.13	CACNB2	D30	D4	protein_coding	protein_coding	0.0572	0	-0.0572	1	TRUE
ENST00000456311,1	CAD	D30	D4	protein_coding	protein_coding	0.21075	0.00945	-0.2013	0.450765	FALSE	upregulated
ENST00000264705.9	CAD	D30	D4	protein_coding	protein_coding	0.355	0.613275	0.258275	1	TRUE
ENST00000463002,2	CADPS	D30	D4	protein_coding	retained_intron	0.045175	0	-0.045175	0.262153	FALSE	upregulated
ENST00000478570,5	CADPS	D30	D4	protein_coding	retained_intron	0.080525	0.14775	0.067225	0.211095	FALSE	downregulated
ENST00000612439.4	CADPS	D30	D4	protein_coding	protein_coding	0.061425	0.2233	0.161875	1	TRUE
ENST00000546443.5	CALCOCO1	D30	D4	protein_coding	protein_coding	0.0082	0.162025	0.153825	0.999855	TRUE
ENST00000430117.6	CALCOCO1	D30	D4	protein_coding	protein_coding	0.23245	0.093975	-0.138475	1	TRUE
ENST00000462181,1	CALD1	D30	D4	protein_coding	processed_transcript	0.180325	0	-0.180325	1.75167e-05	FALSE	upregulated
ENST00000475772,5	CALD1	D30	D4	protein_coding	retained_intron	0.060725	0.0178	-0.042925	0.167093	FALSE	upregulated
ENST00000424922.5	CALD1	D30	D4	protein_coding	protein_coding	0	0.100975	0.100975	1	TRUE
ENST00000393118.6	CALD1	D30	D4	protein_coding	protein_coding	0.03795	0.29065	0.2527	1	TRUE
ENST00000540479.6	CALML4	D30	D4	protein_coding	protein_coding	0.203975	0	-0.203975	NA	NA
ENST00000683506.1	CAMK2A	D30	D4	protein_coding	nonsense_mediated_decay	0.0305	0.2088	0.1783	0.960489	TRUE
ENST00000671881.1	CAMK2A	D30	D4	protein_coding	protein_coding	0.220225	0.032575	-0.18765	1	TRUE
ENST00000508738.5	CAMK2D	D30	D4	protein_coding	protein_coding	0.197775	0.0012	-0.196575	1	TRUE
ENST00000379773.6	CAMK2D	D30	D4	protein_coding	protein_coding	0	0.14435	0.14435	1	TRUE
ENST00000342666.9	CAMK2D	D30	D4	protein_coding	protein_coding	0.1579	0.3249	0.167	1	TRUE
ENST00000572326,1	CAMTA2	D30	D4	protein_coding	processed_transcript	0	0.1181	0.1181	0.0499761	FALSE	downregulated
ENST00000504734.5	CANX	D30	D4	protein_coding	protein_coding	0.103425	0.259125	0.1557	NA	NA
ENST00000397163.8	CAPN3	D30	D4	protein_coding	protein_coding	0.312625	0	-0.312625	1	TRUE
ENST00000375142.5	CAPZB	D30	D4	protein_coding	protein_coding	0.34005	0.000225	-0.339825	0.999994	TRUE
ENST00000264202.8	CAPZB	D30	D4	protein_coding	protein_coding	0.54155	0.9505	0.40895	0.999989	TRUE
ENST00000526890.5	CARS1	D30	D4	protein_coding	retained_intron	0.294825	0.113575	-0.18125	0.999191	TRUE
ENST00000675539,1	CASC9	D30	D4	lncRNA	retained_intron	0.161825	0.0105	-0.151325	1.15084e-05	FALSE	upregulated
ENST00000676364,1	CASC9	D30	D4	lncRNA	lncRNA	0.007275	0.128825	0.12155	0.463249	FALSE	downregulated
ENST00000645566.1	CASK	D30	D4	protein_coding	protein_coding	0	0.1441	0.1441	1	TRUE
ENST00000378166.9	CASK	D30	D4	protein_coding	protein_coding	0.3696	0.131975	-0.237625	1	TRUE
ENST00000509529,1	CAST	D30	D4	protein_coding	retained_intron	0.029025	0.0119	-0.017125	0.0671541	FALSE	upregulated
ENST00000675858.1	CAST	D30	D4	protein_coding	protein_coding	0.00715	0.024475	0.017325	1	TRUE
ENST00000510156.5	CAST	D30	D4	protein_coding	protein_coding	0.019925	0.10655	0.086625	0.998251	TRUE
ENST00000509903.5	CAST	D30	D4	protein_coding	protein_coding	0.012	0.187625	0.175625	1	TRUE
ENST00000508830.5	CAST	D30	D4	protein_coding	protein_coding	0.099575	0.0053	-0.094275	1	TRUE
ENST00000395813.5	CAST	D30	D4	protein_coding	protein_coding	0.12805	0.003025	-0.125025	1	TRUE
ENST00000343213.2	CAV2	D30	D4	protein_coding	protein_coding	0.17395	0	-0.17395	NA	NA
ENST00000507752,1	CBR4	D30	D4	protein_coding	nonsense_mediated_decay	0.098775	0.207825	0.10905	0.0799317	FALSE	downregulated
ENST00000306193.8	CBR4	D30	D4	protein_coding	protein_coding	0.583375	0.3803	-0.203075	0.971024	TRUE
ENST00000469420,1	CBX6	D30	D4	protein_coding	retained_intron	0.301	0.525	0.224	0.342973	FALSE	downregulated
ENST00000407418.8	CBX6	D30	D4	protein_coding	protein_coding	0.6937	0.4511	-0.2426	0.998977	TRUE
ENST00000498142,1	CCDC141	D30	D4	protein_coding	processed_transcript	0.0107	0.06665	0.05595	0.103575	FALSE	downregulated
ENST00000443758.7	CCDC141	D30	D4	protein_coding	protein_coding	0.195625	0.31835	0.122725	1	TRUE
ENST00000442740.1	CCDC51	D30	D4	protein_coding	protein_coding	0.1064	0.0058	-0.1006	0.999998	TRUE
ENST00000523799.5	CCNC	D30	D4	protein_coding	protein_coding	0.007725	0.06815	0.060425	0.998998	TRUE
ENST00000518714.5	CCNC	D30	D4	protein_coding	protein_coding	0.20455	0.069725	-0.134825	0.999697	TRUE
ENST00000486428.6	CCNC	D30	D4	protein_coding	protein_coding	0.02975	0.1546	0.12485	0.998504	TRUE
ENST00000543283.2	CCSER2	D30	D4	protein_coding	protein_coding	0.0727	0.001575	-0.071125	0.97768	TRUE
ENST00000498300.5	CCSER2	D30	D4	protein_coding	processed_transcript	0.169075	0.005325	-0.16375	0.997374	TRUE
ENST00000359979.8	CCSER2	D30	D4	protein_coding	protein_coding	0.236175	0.354275	0.1181	1	TRUE
ENST00000462133.5	CCT6A	D30	D4	protein_coding	processed_transcript	0.032575	0.169275	0.1367	NA	NA
ENST00000536388,5	CD27-AS1	D30	D4	lncRNA	retained_intron	0.169275	0.007975	-0.1613	0.0155276	FALSE	upregulated
ENST00000545339,5	CD27-AS1	D30	D4	lncRNA	lncRNA	0.140975	0.01125	-0.129725	0.118281	FALSE	upregulated
ENST00000535639,5	CD27-AS1	D30	D4	lncRNA	retained_intron	0.0788	0.00615	-0.07265	0.114692	FALSE	upregulated
ENST00000504270,2	CD27-AS1	D30	D4	lncRNA	retained_intron	0.32395	0.774025	0.450075	0.0140381	FALSE	downregulated
ENST00000488596,5	CD46	D30	D4	protein_coding	processed_transcript	0.0284	0.0088	-0.0196	0.0168351	FALSE	upregulated
ENST00000361309.6	CD47	D30	D4	protein_coding	protein_coding	0.02225	0.081525	0.059275	0.999997	TRUE
ENST00000355354.13	CD47	D30	D4	protein_coding	protein_coding	0.217275	0.0574	-0.159875	0.999878	TRUE
ENST00000346693,8	CD99L2	D30	D4	protein_coding	nonsense_mediated_decay	0.0455	0.159375	0.113875	0.395708	FALSE	downregulated
ENST00000466436.5	CD99L2	D30	D4	protein_coding	protein_coding	0.0522	0	-0.0522	0.999816	TRUE
ENST00000344548.7	CDC42	D30	D4	protein_coding	protein_coding	0.721075	0.831675	0.1106	0.976697	TRUE
ENST00000647662.1	CDC73	D30	D4	protein_coding	processed_transcript	0.27665	0.52085	0.2442	0.97008	TRUE
ENST00000367435.5	CDC73	D30	D4	protein_coding	protein_coding	0.215575	0.09995	-0.115625	0.999998	TRUE
ENST00000489669.1	CDCA7L	D30	D4	protein_coding	retained_intron	0.0673	0.01235	-0.05495	NA	NA
ENST00000457951.5	CDCA7L	D30	D4	protein_coding	protein_coding	0.001475	0.197525	0.19605	NA	NA
ENST00000447180.5	CDCA7L	D30	D4	protein_coding	protein_coding	0.1417	0.272175	0.130475	NA	NA
ENST00000435717.1	CDCA7L	D30	D4	protein_coding	protein_coding	0.1103	0.03465	-0.07565	NA	NA
ENST00000642626,1	CDK13	D30	D4	protein_coding	protein_coding	0.1376	0.044875	-0.092725	0.167699	FALSE	upregulated
ENST00000647453.1	CDK13	D30	D4	protein_coding	retained_intron	0.04165	0.020025	-0.021625	0.577166	TRUE
ENST00000577664,5	CDK5RAP3	D30	D4	protein_coding	nonsense_mediated_decay	0	0.061725	0.061725	0.0780526	FALSE	downregulated
ENST00000578996,1	CDK5RAP3	D30	D4	protein_coding	retained_intron	0.055725	0.2607	0.204975	0.0701428	FALSE	downregulated
ENST00000338399.9	CDK5RAP3	D30	D4	protein_coding	protein_coding	0.2978	0.09	-0.2078	1	TRUE
ENST00000503932,6	CDV3	D30	D4	protein_coding	nonsense_mediated_decay	0.0019	0.163675	0.161775	0.0707309	FALSE	downregulated
ENST00000264993.8	CDV3	D30	D4	protein_coding	protein_coding	0.329675	0.177725	-0.15195	0.999895	TRUE
ENST00000651608.1	CENPBD1P1	D30	D4	transcribed_processed_pseudogene	processed_transcript	0.62605	0.387175	-0.238875	0.708995	TRUE
ENST00000493504.1	CENPBD1P1	D30	D4	transcribed_processed_pseudogene	processed_transcript	0.37395	0.612825	0.238875	0.536583	TRUE
ENST00000257766.8	CEP162	D30	D4	protein_coding	protein_coding	0.22005	0.00875	-0.2113	1	TRUE
ENST00000544522,5	CEP57	D30	D4	protein_coding	protein_coding	0.00545	0.087725	0.082275	0.18661	FALSE	downregulated
ENST00000547138,5	CERS5	D30	D4	protein_coding	processed_transcript	0.169	0.015525	-0.153475	0.334909	FALSE	upregulated
ENST00000546406,1	CERS5	D30	D4	protein_coding	retained_intron	0.1351	0	-0.1351	0.0590197	FALSE	upregulated
ENST00000551697.5	CERS5	D30	D4	protein_coding	nonsense_mediated_decay	0.093375	0.01035	-0.083025	0.99993	TRUE
ENST00000547787.5	CERS5	D30	D4	protein_coding	nonsense_mediated_decay	0.009925	0.195525	0.1856	0.999657	TRUE
ENST00000438450.6	CERS5	D30	D4	protein_coding	nonsense_mediated_decay	0	0.0398	0.0398	0.984429	TRUE
ENST00000317551.12	CERS5	D30	D4	protein_coding	protein_coding	0.04185	0.146	0.10415	0.999998	TRUE
ENST00000392687.4	CERS6	D30	D4	protein_coding	protein_coding	0.606225	0.009375	-0.59685	0.999982	TRUE
ENST00000305747.11	CERS6	D30	D4	protein_coding	protein_coding	0.393775	0.990625	0.59685	0.999986	TRUE
ENST00000442513.7	CFAP221	D30	D4	protein_coding	protein_coding	0	0.268475	0.268475	NA	NA
ENST00000618450.1	CHD7	D30	D4	protein_coding	retained_intron	0.04245	0.017625	-0.024825	NA	NA
ENST00000527825.1	CHD7	D30	D4	protein_coding	nonsense_mediated_decay	0.0206	0.183975	0.163375	NA	NA
ENST00000525508.1	CHD7	D30	D4	protein_coding	protein_coding	0.07025	0.032225	-0.038025	NA	NA
ENST00000565832.5	CHD9	D30	D4	protein_coding	protein_coding	0.117925	0	-0.117925	NA	NA
ENST00000433028,6	CHEK2	D30	D4	protein_coding	nonsense_mediated_decay	0.2726	0.10985	-0.16275	0.129898	FALSE	upregulated
ENST00000472807,1	CHEK2	D30	D4	protein_coding	retained_intron	0.034125	0	-0.034125	0.147206	FALSE	upregulated
ENST00000519534,1	CHTF8	D30	D4	protein_coding	nonsense_mediated_decay	0.010125	0.1193	0.109175	0.460828	FALSE	downregulated
ENST00000548752,7	CHURC1	D30	D4	protein_coding	protein_coding	0.584875	0.86055	0.275675	0.181895	FALSE	downregulated
ENST00000549115.7	CHURC1	D30	D4	protein_coding	protein_coding	0.3292	0.100775	-0.228425	0.522561	TRUE
ENST00000567172.1	CIAO3	D30	D4	protein_coding	processed_transcript	0.0416	0.257175	0.215575	NA	NA
ENST00000590347,5	CIRBP	D30	D4	protein_coding	nonsense_mediated_decay	0.025075	0.002325	-0.02275	0.153294	FALSE	upregulated
ENST00000437669.5	CKMT2	D30	D4	protein_coding	protein_coding	0.169125	0	-0.169125	1	TRUE
ENST00000424301.6	CKMT2	D30	D4	protein_coding	protein_coding	0.0163	0.05525	0.03895	1	TRUE
ENST00000254035.9	CKMT2	D30	D4	protein_coding	protein_coding	0.5669	0.107075	-0.459825	1	TRUE
ENST00000480385.1	CLASP2	D30	D4	protein_coding	protein_coding	0.091675	0.02745	-0.064225	NA	NA
ENST00000476251.1	CLASP2	D30	D4	protein_coding	nonsense_mediated_decay	0.148475	0.024375	-0.1241	NA	NA
ENST00000512813,5	CLCN3	D30	D4	protein_coding	protein_coding	0.035825	0	-0.035825	0.148986	FALSE	upregulated
ENST00000347613.8	CLCN3	D30	D4	protein_coding	protein_coding	0.1563	0.304475	0.148175	1	TRUE
ENST00000495768,1	CLDN12	D30	D4	protein_coding	processed_transcript	0.132825	0.032975	-0.09985	0.0153207	FALSE	upregulated
ENST00000287916.8	CLDN12	D30	D4	protein_coding	protein_coding	0.316075	0.556825	0.24075	0.963558	TRUE
ENST00000541410,1	CLIP1	D30	D4	protein_coding	retained_intron	0.01165	0.05705	0.0454	0.439408	FALSE	downregulated
ENST00000620786.5	CLIP1	D30	D4	protein_coding	protein_coding	0.2694	0.02365	-0.24575	1	TRUE
ENST00000473565.5	CLK1	D30	D4	protein_coding	retained_intron	0.15905	0.101825	-0.057225	NA	NA
ENST00000251195.9	CLSPN	D30	D4	protein_coding	protein_coding	0.463525	0.25855	-0.204975	1	TRUE
ENST00000435891.5	CLSTN1	D30	D4	protein_coding	protein_coding	0.0311	0.20335	0.17225	1	TRUE
ENST00000377298.9	CLSTN1	D30	D4	protein_coding	protein_coding	0.5606	0.018075	-0.542525	1	TRUE
ENST00000472651,5	CLTC	D30	D4	protein_coding	protein_coding	0.3828	0.133725	-0.249075	0.139894	FALSE	upregulated
ENST00000579456.5	CLTC	D30	D4	protein_coding	protein_coding	0.08715	0.1856	0.09845	1	TRUE
ENST00000576634.6	CLUAP1	D30	D4	protein_coding	protein_coding	0.162675	0.0768	-0.085875	NA	NA
ENST00000575134.1	CLUAP1	D30	D4	protein_coding	nonsense_mediated_decay	0	0.09325	0.09325	NA	NA
ENST00000572600.5	CLUAP1	D30	D4	protein_coding	protein_coding	0.00835	0.068475	0.060125	NA	NA
ENST00000565029,5	CMIP	D30	D4	protein_coding	retained_intron	0.071125	0.0126	-0.058525	0.241703	FALSE	upregulated
ENST00000649644.1	CNOT6L	D30	D4	protein_coding	protein_coding	0.31865	0.02185	-0.2968	1	TRUE
ENST00000625365,2	CNTNAP2	D30	D4	protein_coding	protein_coding	0.0638	0.0008	-0.063	0.108082	FALSE	upregulated
ENST00000463592,3	CNTNAP2	D30	D4	protein_coding	protein_coding	0.642975	0.987825	0.34485	0.410119	FALSE	downregulated
ENST00000637555.1	CNTNAP2	D30	D4	protein_coding	retained_intron	0.063425	0.001025	-0.0624	0.996157	TRUE
ENST00000361727.8	CNTNAP2	D30	D4	protein_coding	protein_coding	0.141825	0.001625	-0.1402	1	TRUE
[truncated: 1,442 more rows]

## Sheet: Supplemental Table S4
Supplemental Table S4. List of enriched biological processes for genes exhibiting DGE and DTA, categorized by functional overlap between regulatory modes (D4 vs. D30)
[truncated: 1,813 more rows]

[truncated: 9 more sheets: Supplemental Table S5, Supplemental Table S6, Supplemental Table S7, Supplemental Table S8, Supplemental Table S9, Supplemental Table S10, Supplemental Table S11, Supplemental Table S12, Supplemental Table S13]
